# Supplementary material for: Altered DNA Methylation Landscapes of Polycomb-Repressed Loci Are Associated with Prostate Cancer Progression and ERG Oncogene Expression in Prostate Cancer
Source: Oxford University Press journal article supplement (doi:10.1158/1078-0432.ccr-12-3139), 2013-04-02
Supplement: 10780432ccr123139-sup-supplementary_table_1_xlsx_file_49k.xlsx [file 10780432ccr123139-sup-supplementary_table_1_xlsx_file_49k.xlsx]

## Sheet: Sheet1
Total GS ANOVA				GS6 vs GS7				GS7 vs GS8
GeneSymbol	Probe Location	GS vs GS8 Fold Change	ANOVA p-value	GeneSymbol	Probe Location	GS6 vs GS7 Log2 Fold Change	T-test p-value	GeneSymbol	Probe Location	GS7 vs GS8 Log2 Fold Change	T-test p-value
TTLL10	chr1:001099631-001099690	-1.01337	0.043	PRKCZ	chr1:002053582-002053638	-0.591299	0.0129846	TBX15	chr1:119328463-119328513	1.07963	0.0234691
PRKCZ	chr1:002053582-002053638	-1.09596	0.003	PRDM16	chr1:003172581-003172638	-0.662287	0.0376123	chr1:119344681-119344725	chr1:119344681-119344725	0.898148	0.0140259
chr1:002836834-002836883	chr1:002836834-002836883	1.01211	0.011	SESN2	chr1:028458369-028458415	-0.753388	0.0245193	chr1:119350952-119350996	chr1:119350952-119350996	0.63946	0.0461033
PRDM16	chr1:003172581-003172638	-1.07338	0.009	WDR57	chr1:031541888-031541944	-0.597736	0.013244	NENF	chr1:210672648-210672707	-0.623799	0.0287807
PARK7	chr1:007944704-007944763	-1.04878	0.005	DLGAP3	chr1:035104908-035104954	-0.604508	0.0312852	HLX1	chr1:219131801-219131860	0.805795	0.022297
ERRFI1	chr1:008008042-008008097	-1.14808	0.026	EIF2C3	chr1:036168741-036168800	-0.610456	0.0241113	chr1:219135440-219135484	chr1:219135440-219135484	0.628684	0.0152278
chr1:017348518-017348562	chr1:017348518-017348562	1.1272	0.003	chr1:050663080-050663139	chr1:050663080-050663139	-0.620417	0.0279437	chr10:094170672-094170720	chr10:094170672-094170720	0.775853	0.0319935
chr1:018983447-018983496	chr1:018983447-018983496	1.227	0.019	LRP8	chr1:053565463-053565509	-0.615003	0.0188432	FGF8	chr10:103529980-103530024	-0.629723	0.0184029
DSCR1L2	chr1:024734522-024734581	-1.02861	0.029	JUN	chr1:059019997-059020056	-0.63604	0.0463123	KNDC1	chr10:134866882-134866930	0.665622	0.008099
MAN1C1	chr1:025970394-025970452	-1.01115	0.027	FOXD3	chr1:063560688-063560734	-0.619567	0.0284992	KCNA4	chr11:029994251-029994297	0.846622	0.0368566
SESN2	chr1:028458369-028458415	-1.29485	0.003	BARHL2	chr1:090964724-090964774	-0.723282	0.000625921	PITPNM1	chr11:067029256-067029300	0.645515	7.80761e-06
DLGAP3	chr1:035104908-035104954	-1.04934	0.006	MTF2	chr1:093317064-093317121	-0.664074	0.0427528	SESN3	chr11:094605171-094605215	0.610582	0.00623218
SFPQ	chr1:035429976-035430035	-1.09528	0.01	GPR88	chr1:100778425-100778469	-0.617764	0.0135229	DHH	chr12:047771493-047771540	0.81566	0.0489611
EIF2C3	chr1:036168741-036168800	-1.10098	0	SLC25A24	chr1:108543860-108543919	-0.686003	0.0113734	B4GALNT1	chr12:056307946-056307990	0.694849	0.0498895
chr1:046729562-046729606	chr1:046729562-046729606	1.14007	0.024	chr1:119351378-119351423	chr1:119351378-119351423	0.665502	0.0189469	chr12:058275866-058275919	chr12:058275866-058275919	-0.585277	0.0310441
FOXD2	chr1:047683320-047683364	1.04317	0.011	ACP6	chr1:145609070-145609127	-0.619539	0.0313301	TBX3	chr12:113589176-113589226	0.808225	0.0177212
LRP8	chr1:053565463-053565509	-1.14479	0.005	TDRKH	chr1:150030152-150030211	-0.596392	0.0196254	COCH	chr14:030414489-030414533	0.646448	0.0369965
FOXD3	chr1:063560688-063560734	-1.13232	0.002	ADAR	chr1:152867155-152867214	-0.72063	0.00868991	ISL2	chr15:074421437-074421488	0.59006	0.0432713
USP33	chr1:077997370-077997424	-1.0493	0.004	LHX9	chr1:196154463-196154522	-0.66372	0.0483232	ATP2C2	chr16:082959717-082959761	-0.619725	0.0195708
BARHL2	chr1:090964724-090964774	-1.24282	0	NENF	chr1:210672648-210672707	-0.682163	0.0266629	ONECUT2	chr18:053259508-053259552	0.754351	0.0327974
MTF2	chr1:093317064-093317121	-1.02061	0.012	TSNAX	chr1:229730768-229730823	-0.63476	0.00926294	POLR2E-GPX4	chr19:001046511-001046555	0.687815	0.018928
hsa-mir-137	chr1:098284230-098284289	-1.14107	0.008	SDCCAG8	chr1:241704774-241704827	-0.6818	0.00970298	SEMA6B	chr19:004494289-004494348	-0.638791	0.010767
GPR88	chr1:100778425-100778469	-1.06309	0.001	chr10:000450110-000450169	chr10:000450110-000450169	-0.686154	0.0196028	BCAT2	chr19:053990230-053990274	-0.685166	0.00974362
SLC25A24	chr1:108543860-108543919	-1.22363	0.001	DHTKD1	chr10:012150621-012150671	-0.585766	0.0259695	KLF11	chr2:010100579-010100635	-0.652158	0.0496015
TBX15	chr1:119328463-119328513	2.28236	0.005	chr10:022765894-022765938	chr10:022765894-022765938	0.740151	0.038638	chr2:045008815-045008861	chr2:045008815-045008861	0.693112	0.0334291
TBX15	chr1:119333660-119333704	1.32255	0.032	ARHGAP21	chr10:025051908-025051952	-0.614193	0.00408616	EIF2AK3	chr2:088630720-088630764	0.788158	0.0242265
TBX15	chr1:119337255-119337299	1.54107	0.026	ACBD5	chr10:027569139-027569198	-0.593452	0.00713355	HOXD3	chr2:176735779-176735829	0.654854	0.0275752
chr1:119344681-119344725	chr1:119344681-119344725	1.66884	0.003	BAMBI	chr10:028997336-028997395	-0.68966	0.0392923	HOXD3	chr2:176738189-176738245	0.923362	0.00847535
chr1:119350952-119350996	chr1:119350952-119350996	1.05487	0.004	TRUB1	chr10:116687774-116687833	-0.772871	0.0290873	NKX2-2	chr20:021436253-021436312	0.945334	0.00516898
ACP6	chr1:145609070-145609127	-1.08247	0.005	VAX1	chr10:118882263-118882313	0.760562	0.0482678	NKX2-2	chr20:021437474-021437518	0.780252	0.0492622
SEMA6C	chr1:149370860-149370910	-1.06973	0.008	CTBP2	chr10:126829710-126829767	-0.719199	0.0328445	ZNF501	chr3:044745859-044745903	0.702064	0.00968122
TDRKH	chr1:150030152-150030211	-1.08952	0.003	EBF3	chr10:131587388-131587447	-0.608652	0.0416103	GP5	chr3:195600293-195600337	0.799354	0.0170903
ADAR	chr1:152867155-152867214	-1.24909	0.002	EBF3	chr10:131651072-131651131	-0.662864	0.0375586	chr4:041570155-041570205	chr4:041570155-041570205	1.26367	0.0102623
chr1:163833916-163833963	chr1:163833916-163833963	-1.04013	0.002	DUSP8	chr11:001552761-001552820	-0.738892	0.014406	SPATA18	chr4:052637928-052637972	0.768555	0.0382084
LHX9	chr1:196154463-196154522	-1.12237	0.002	ZNF143	chr11:009439771-009439830	-0.636981	0.0166569	GSH2	chr4:054671017-054671076	0.607831	0.00709481
LHX9	chr1:196157034-196157079	1.0774	0.036	CTSC	chr11:087710096-087710153	-0.797718	0.0282967	LSM6	chr4:147317014-147317068	-0.821608	0.0233248
NENF	chr1:210672648-210672707	-1.30596	0.001	chr11:093034659-093034703	chr11:093034659-093034703	-0.641658	0.018135	EBF1	chr5:158464953-158465003	0.970789	0.0115271
TGFB2	chr1:216587004-216587055	1.61994	0.022	FAM118B	chr11:125587033-125587082	-0.609947	0.0470529	HIST1H2BD	chr6:026279962-026280020	0.94091	0.0404259
HLX1	chr1:219131801-219131860	1.5017	0.008	CDKN1B	chr12:012767812-012767871	-0.757438	0.0268992	chr6:027172564-027172610	chr6:027172564-027172610	0.670864	0.0117726
HLX1	chr1:219134292-219134336	1.08324	0.037	FLJ22662	chr12:014611427-014611486	-0.635215	0.0474216	ZNF96	chr6:028475128-028475172	0.993982	0.0368663
chr1:219135440-219135484	chr1:219135440-219135484	1.11678	0.01	WBP11	chr12:014847155-014847213	-0.677531	0.038649	TFAP2B	chr6:050918953-050919000	0.655099	0.0162698
ACTA1	chr1:227635511-227635555	1.26957	0.009	DERA	chr12:015955408-015955453	-0.607593	0.0171576	chr6:074065521-074065567	chr6:074065521-074065567	0.592785	0.0460147
TSNAX	chr1:229730768-229730823	-1.03238	0.001	DHH	chr12:047771493-047771540	0.987954	0.0178629	HTR1B	chr6:078230176-078230222	-0.59063	0.019214
chr10:000449644-000449696	chr10:000449644-000449696	-1.34131	0.015	chr12:058275866-058275919	chr12:058275866-058275919	-0.709092	0.0222337	chr6:106540789-106540833	chr6:106540789-106540833	0.643338	0.036565
chr10:000515646-000515705	chr10:000515646-000515705	-1.00759	0.036	chr12:129754079-129754123	chr12:129754079-129754123	-0.643714	0.0407683	UNCX4.1	chr7:001252491-001252550	0.761343	0.0167391
LARP5	chr10:000845572-000845631	-1.19185	0.044	GPR133	chr12:130138887-130138937	0.653638	0.0186455	HOXA11	chr7:027192107-027192151	-0.70615	0.0417705
chr10:002533427-002533478	chr10:002533427-002533478	1.16325	0.029	PDX1	chr13:027389680-027389739	-0.59466	0.0364316	EBF2	chr8:025955446-025955495	0.744852	0.0445109
GDI2	chr10:005894614-005894673	-1.03696	0.021	DOCK9	chr13:098537596-098537640	-0.606277	0.0149282	SMARCA2	chr9:002037850-002037909	-0.639123	0.0376785
chr10:022765894-022765938	chr10:022765894-022765938	1.4605	0.014	chr13:111808918-111808962	chr13:111808918-111808962	0.667182	0.0283311	HSPA5	chr9:127042748-127042793	-0.60066	0.0411946
ARHGAP21	chr10:025051908-025051952	-1.11103	0.001	MCF2L	chr13:112711590-112711649	-0.846954	0.038552	LMX1B	chr9:128427187-128427237	0.588246	0.0104189
ACBD5	chr10:027569139-027569198	-1.10155	0	chr14:025743933-025743992	chr14:025743933-025743992	-0.620422	0.0358473
MKX	chr10:028074087-028074133	1.05848	0.014	chr14:036044192-036044251	chr14:036044192-036044251	-0.901707	0.0124704
BAMBI	chr10:028997336-028997395	-1.16222	0.008	FLJ39779	chr14:068331693-068331751	-0.617535	0.0350117
chr10:053840671-053840730	chr10:053840671-053840730	-1.23057	0.002	chr15:038586465-038586524	chr15:038586465-038586524	-0.70418	0.0302653
LOC439985	chr10:076827611-076827670	-1.1656	0.001	CEP152	chr15:046890236-046890295	-0.659333	0.0163789
chr10:094170798-094170844	chr10:094170798-094170844	1.20954	0.026	chr15:091154103-091154157	chr15:091154103-091154157	-0.653757	0.0388649
ARHGAP19	chr10:099042494-099042553	-1.04654	0.003	chr15:093671348-093671407	chr15:093671348-093671407	-0.631799	0.0468801
chr10:102409429-102409488	chr10:102409429-102409488	1.43397	0.026	chr16:000840857-000840901	chr16:000840857-000840901	0.613269	0.0321019
FGF8	chr10:103529980-103530024	-1.37439	0.001	SRRM2	chr16:002756502-002756547	0.648479	0.0426619
TRUB1	chr10:116687774-116687833	-1.22875	0.003	COG7	chr16:023372022-023372066	-0.615529	0.0247356
VAX1	chr10:118882263-118882313	1.83162	0.011	ZNF688	chr16:030490607-030490666	-0.625331	0.0220784
chr10:119484526-119484570	chr10:119484526-119484570	1.27294	0.021	PYDC1	chr16:031134781-031134837	-0.588696	0.00698081
CTBP2	chr10:126829710-126829767	-1.20122	0.007	IRX5	chr16:053525306-053525365	-0.628576	0.022683
ADAM12	chr10:128067511-128067570	-1.09642	0.003	ATP2C2	chr16:082959717-082959761	-0.772298	0.00417017
EBF3	chr10:131651072-131651131	-1.08522	0.002	TAX1BP3-TMEM93	chr17:003518723-003518767	-0.675366	0.0136075
EBF3	chr10:131654546-131654605	-1.04008	0.02	TAF15	chr17:031160305-031160364	-0.691601	0.0282993
EBF3	chr10:131660315-131660374	-1.01379	0.003	RPL27	chr17:038403950-038403995	-0.69271	0.00904152
KNDC1	chr10:134866882-134866930	1.12624	0.007	chr18:008697257-008697301	chr18:008697257-008697301	-0.677457	0.0263322
KNDC1	chr10:134883272-134883317	-1.04096	0.003	PPP4R1	chr18:009603677-009603734	-0.689612	0.0077222
DUSP8	chr11:001552761-001552820	-1.15389	0.002	SEC11C	chr18:054957488-054957547	-0.660194	0.0438962
ZNF214	chr11:006997549-006997608	-1.11301	0.004	chr18:071296334-071296393	chr18:071296334-071296393	-0.622453	0.0138075
NRIP3	chr11:008982915-008982971	1.01616	0.001	SEMA6B	chr19:004494289-004494348	-0.831697	0.0108817
ZNF143	chr11:009439771-009439830	-1.15071	0.001	KHSRP	chr19:006365673-006365732	-0.72725	0.0304667
BDNF	chr11:027679228-027679287	-1.00131	0.008	FLJ12949	chr19:010538076-010538125	-0.639749	0.0475728
BDNF	chr11:027700059-027700103	1.11657	0.028	SAMD1	chr19:014053202-014053247	-0.599514	0.0310825
KCNA4	chr11:029994251-029994297	1.41158	0.027	ANKRD27	chr19:037857258-037857313	-0.593976	0.0186192
NAT10	chr11:034083388-034083440	-1.14503	0.049	KCTD15	chr19:038980539-038980598	-0.724124	0.0141213
MTCH2	chr11:047620034-047620093	-1.062	0.015	LIM2	chr19:056589353-056589408	-0.815041	0.0476835
SIPA1	chr11:065166168-065166213	1.14414	0.029	ZNF274	chr19:063407845-063407904	-0.734203	0.0222028
PITPNM1	chr11:067029256-067029300	1.11479	0	chr2:000409955-000410014	chr2:000409955-000410014	-0.647772	0.0285991
FGF19	chr11:069227013-069227067	-1.11832	0.003	KLF11	chr2:010100500-010100544	-0.797186	0.0275911
NUMA1-LRRC51	chr11:071469204-071469248	-1.0561	0.003	SF3B14	chr2:024152723-024152767	-0.706632	0.00218404
PHOX2A	chr11:071633203-071633256	1.18206	0.036	chr2:039041258-039041311	chr2:039041258-039041311	-0.620375	0.0180908
EED	chr11:085632924-085632983	-1.07351	0.002	JMJD1A	chr2:086521213-086521272	-0.696125	0.046208
CCDC81	chr11:085763683-085763742	-1.03712	0.04	chr2:088533582-088533641	chr2:088533582-088533641	-0.608172	0.0280079
CTSC	chr11:087710096-087710153	-1.33006	0.001	EIF2AK3	chr2:088630720-088630764	0.77055	0.0168182
chr11:093034659-093034703	chr11:093034659-093034703	-1.18012	0.002	KCNIP3	chr2:095375566-095375613	-0.652518	0.0106935
ACAT1	chr11:107497990-107498049	-1.02706	0.023	AFF3	chr2:099576534-099576580	-0.600739	0.0148699
chr11:114529742-114529801	chr11:114529742-114529801	-1.2896	0.002	chr2:118660231-118660285	chr2:118660231-118660285	-0.609158	0.0258469
PKNOX2	chr11:124541526-124541570	-1.01184	0.005	ARHGEF4	chr2:131509716-131509768	-0.654694	0.00329364
FAM118B	chr11:125587033-125587082	-1.09217	0.007	CXCR4	chr2:136591857-136591906	-0.590725	0.0314507
WNK1	chr12:000733626-000733673	-1.06193	0.006	PSMD14	chr2:161873208-161873252	-0.642718	0.0253848
CDKN1B	chr12:012767812-012767871	-1.2677	0	DLX1	chr2:172656461-172656520	-0.623079	0.0207682
GPRC5A	chr12:012935992-012936051	-1.10148	0.018	CDCA7	chr2:173928473-173928517	-0.677439	0.0265381
FLJ22662	chr12:014611427-014611486	-1.11092	0.004	EVX2	chr2:176654668-176654727	-0.913043	0.0223336
H2AFJ	chr12:014819202-014819250	-1.08372	0.014	HOXD3	chr2:176738050-176738094	0.718062	0.0163306
WBP11	chr12:014847155-014847213	-1.05107	0.008	ICA1L	chr2:203445170-203445229	-0.60706	0.0391143
DERA	chr12:015955408-015955453	-1.1074	0.002	RQCD1	chr2:219142005-219142051	-0.603399	0.0234991
IPO8	chr12:030740178-030740223	-1.05893	0.002	FLJ32447	chr2:222869658-222869717	-0.629995	0.0226366
DHH	chr12:047771493-047771540	1.80361	0.002	chr2:234147597-234147647	chr2:234147597-234147647	-0.598233	0.0388306
FMNL3	chr12:048387881-048387940	-1.23263	0.003	MKKS-C20orf94	chr20:010363012-010363071	-0.649139	0.0311783
HOXC11	chr12:052653010-052653069	1.4847	0.049	SCAND1	chr20:034005973-034006017	-0.613293	0.0171822
HOXC4	chr12:052732060-052732119	-1.09069	0.004	L3MBTL	chr20:041569185-041569229	-0.646152	0.0161981
B4GALNT1	chr12:056307946-056307990	1.2703	0.008	SLC12A5	chr20:044120523-044120567	0.6816	0.0195799
chr12:058275866-058275919	chr12:058275866-058275919	-1.29437	0.001	chr20:059032711-059032766	chr20:059032711-059032766	-0.59995	0.0277944
chr12:061614743-061614789	chr12:061614743-061614789	-1.00021	0	ADRM1	chr20:060311769-060311813	-0.589621	0.0472193
TBX5	chr12:113325908-113325952	1.05344	0.018	ZBTB46	chr20:061909476-061909535	-0.779488	0.0193353
TBX3	chr12:113589176-113589226	1.55544	0.005	PTTG1IP	chr21:045118619-045118676	-0.63893	0.00985759
TBX3	chr12:113606140-113606191	-1.06367	0.014	COL6A1	chr21:046225512-046225571	-0.592848	0.0266926
chr12:126811476-126811535	chr12:126811476-126811535	-1.21306	0.013	C21orf56	chr21:046405883-046405927	-0.587864	0.0219827
GPR133	chr12:130138887-130138937	1.02914	0.016	SUHW2	chr22:021192581-021192636	-0.671447	0.0472722
chr12:131466722-131466777	chr12:131466722-131466777	-1.02243	0.036	FAM19A5	chr22:047533270-047533329	-0.716408	0.0184833
PDX1	chr13:027389680-027389739	-1.04394	0.002	chr22:048023950-048024009	chr22:048023950-048024009	-0.604608	0.0457281
KIAA0774	chr13:028975529-028975588	1.08146	0.018	LRRFIP2	chr3:037192021-037192080	-0.745433	0.0388361
NBEA	chr13:034943512-034943569	-1.00944	0.001	chr3:044013493-044013548	chr3:044013493-044013548	-0.639793	0.0411115
EPSTI1	chr13:042463956-042464014	-1.21658	0.01	FLJ42117	chr3:059010345-059010398	-0.607403	0.0379836
C13orf18	chr13:045859522-045859566	-1.01268	0.004	WDR5B	chr3:123617314-123617369	-0.702158	0.0395925
DOCK9	chr13:098537596-098537640	-1.09289	0.001	TF	chr3:134985159-134985218	-0.681345	0.0480501
chr13:111808918-111808962	chr13:111808918-111808962	1.40482	0.006	SOX14	chr3:138970217-138970263	0.752415	0.0485802
chr13:111943320-111943379	chr13:111943320-111943379	-1.47837	0.012	chr3:161425564-161425623	chr3:161425564-161425623	-0.588755	0.0135451
MCF2L	chr13:112711590-112711649	-1.42964	0	PAK2	chr3:197950947-197951005	-0.650957	0.00744762
MMP14	chr14:022376111-022376161	-1.042	0.003	LEF1	chr4:109308182-109308233	-0.682057	0.0119916
CBLN3-KIAA0323	chr14:023968733-023968779	-1.02272	0.004	LOC441046	chr4:144699919-144699978	-0.619533	0.0236876
chr14:025743933-025743992	chr14:025743933-025743992	-1.07153	0.002	LSM6	chr4:147317014-147317068	-0.953106	0.033066
COCH	chr14:030414489-030414533	1.07891	0.05	EDNRA	chr4:148622227-148622279	-0.637178	0.0408226
chr14:036044192-036044251	chr14:036044192-036044251	-1.47691	0.001	HAND2	chr4:174688041-174688092	-0.616666	0.0177091
SSTR1	chr14:037749807-037749856	1.25847	0.036	MRPL36-NDUFS6	chr5:001853187-001853246	-0.633879	0.0218783
LRFN5	chr14:041137112-041137171	-1.12697	0.024	chr5:002165236-002165287	chr5:002165236-002165287	-0.604644	0.0456458
KIAA1344	chr14:052089282-052089326	-1.0543	0.031	TARS	chr5:033476474-033476518	-0.600535	0.0188102
BMP4	chr14:053488428-053488472	1.27026	0.02	C5orf28	chr5:043519157-043519216	-0.614408	0.0316427
DACT1	chr14:058175372-058175431	-1.01398	0.001	MARVELD2	chr5:068747253-068747303	-0.630586	0.014014
FLJ39779	chr14:068331693-068331751	-1.13629	0.002	chr5:087934449-087934496	chr5:087934449-087934496	-0.752987	0.0185776
KIAA0247	chr14:069148881-069148940	-1.02886	0.033	chr5:092981977-092982036	chr5:092981977-092982036	-0.729089	0.0378425
chr14:075670649-075670708	chr14:075670649-075670708	-1.22404	0.024	DND1	chr5:140032932-140032977	-0.586055	0.0392438
chr14:103757055-103757099	chr14:103757055-103757099	-1.00574	0.002	TAF7	chr5:140680004-140680063	-0.741518	0.0440574
NIPA2	chr15:020585317-020585376	-1.11623	0.008	SH3RF2	chr5:145296289-145296343	-0.755617	0.0374712
SNRPN	chr15:022644567-022644611	-1.05483	0	POU4F3	chr5:145702969-145703013	0.705914	0.0451795
chr15:038586465-038586524	chr15:038586465-038586524	-1.34809	0.006	EBF1	chr5:158464953-158465003	0.770942	0.0224938
DLL4	chr15:039006016-039006060	1.18261	0.028	UBXD8	chr5:175807731-175807780	-0.634792	0.0351545
MAPKBP1	chr15:039853712-039853770	-1.00286	0.009	FOXC1	chr6:001558451-001558510	-0.629931	0.0279228
chr15:043783769-043783813	chr15:043783769-043783813	1.1455	0.018	HIST1H1B	chr6:027943285-027943341	0.823429	0.0375016
CEP152	chr15:046890236-046890295	-1.17268	0	TRIM26	chr6:030289419-030289470	-0.604409	0.00443105
ISLR2	chr15:072214502-072214548	1.02062	0.018	RPP21	chr6:030420787-030420831	-0.65591	0.0379343
ISL2	chr15:074421437-074421488	1.16436	0.037	IER3	chr6:030819402-030819461	-0.709849	0.0478897
KLHL25	chr15:084139411-084139455	-1.00468	0.018	HTR1B	chr6:078230176-078230222	-0.677591	0.0176154
ST8SIA2	chr15:090739160-090739204	-1.10039	0	chr6:078416482-078416541	chr6:078416482-078416541	-0.610705	0.0415678
chr15:091154103-091154157	chr15:091154103-091154157	-1.13235	0.008	SLC22A16	chr6:110904929-110904988	-0.66052	0.015508
chr15:093671348-093671407	chr15:093671348-093671407	-1.10001	0.003	PTPRK	chr6:128882593-128882642	-0.618826	0.0177429
chr15:094712480-094712531	chr15:094712480-094712531	1.28286	0.023	PEX7	chr6:137186152-137186211	-0.644353	0.0426324
C16orf75	chr16:011347171-011347215	-1.01391	0.005	C6orf208	chr6:169932193-169932248	-0.633815	0.00314092
COG7	chr16:023372022-023372066	-1.03153	0.002	UNCX4.1	chr7:001240405-001240464	-0.654814	0.04587
ATXN2L	chr16:028741575-028741619	-1.03963	0.032	chr7:039839250-039839309	chr7:039839250-039839309	-0.61664	0.0332985
ZNF688	chr16:030490607-030490666	-1.07098	0.002	ACA9	chr7:044992436-044992483	-0.669685	0.0183795
PYDC1	chr16:031134781-031134837	-1.05729	0.003	GTF2I	chr7:073711030-073711085	-0.638024	0.00423277
AKTIP	chr16:052093923-052093973	-1.13921	0.002	KRIT1	chr7:091712621-091712678	-0.640105	0.0304506
chr16:080337647-080337706	chr16:080337647-080337706	-1.0018	0.045	ARPC1B	chr7:098809617-098809675	-0.59616	0.0428107
ATP2C2	chr16:082959717-082959761	-1.39202	0	TES	chr7:115637521-115637576	-0.613543	0.0127227
chr17:000660403-000660462	chr17:000660403-000660462	-1.20467	0.009	chr7:130442577-130442636	chr7:130442577-130442636	-0.723559	0.00202307
TAX1BP3-TMEM93	chr17:003518723-003518767	-1.08685	0.001	ZNF282	chr7:148554156-148554215	-0.776305	0.0433707
MPDU1	chr17:007427950-007428003	-1.16692	0.001	WDR86	chr7:150737085-150737144	-0.903712	0.0360034
chr17:025952291-025952335	chr17:025952291-025952335	1.17838	0.038	PRKAG2	chr7:151204926-151204978	-0.651972	0.00400092
TAF15	chr17:031160305-031160364	-1.15167	0.008	HLXB9	chr7:156497211-156497270	-0.648309	0.0248631
RPL27	chr17:038403950-038403995	-1.24358	0.001	HLXB9	chr7:156504283-156504342	-0.674902	0.044904
GJA7	chr17:040262285-040262344	-1.20797	0.031	chr7:157172651-157172710	chr7:157172651-157172710	-0.794423	0.0410665
MAPT	chr17:041330510-041330554	1.01927	0.05	MYOM2	chr8:002065856-002065915	-0.857794	0.0229855
CACNA1G	chr17:045992348-045992398	1.45803	0.007	CSMD1	chr8:004836320-004836365	-0.609917	0.025633
chr17:053386750-053386809	chr17:053386750-053386809	-1.06059	0.001	ELP3	chr8:028006725-028006770	-0.636467	0.0098927
SOX9	chr17:067627808-067627857	-1.1524	0.016	TRPS1	chr8:116750689-116750745	-0.626194	0.0292197
chr17:073301169-073301228	chr17:073301169-073301228	-1.03249	0.035	ANKRD15	chr9:000495767-000495821	-0.959975	0.00546628
chr17:076984212-076984271	chr17:076984212-076984271	-1.05573	0	SMARCA2	chr9:002037850-002037909	-0.798148	0.00734678
ADCYAP1	chr18:000898516-000898567	-1.05845	0.015	chr9:014338713-014338757	chr9:014338713-014338757	-0.662958	0.0495292
chr18:008697257-008697301	chr18:008697257-008697301	-1.03825	0.011	C9orf82	chr9:026882194-026882245	-0.644831	0.0353365
KIAA0802	chr18:008697592-008697651	-1.03222	0.049	chr9:092920282-092920341	chr9:092920282-092920341	-0.798918	0.0321247
PPP4R1	chr18:009603677-009603734	-1.12211	0.002	NOL8	chr9:094127829-094127877	-0.61321	0.0358107
ONECUT2	chr18:053259909-053259958	1.22754	0.035	RAB14	chr9:123004279-123004333	-0.598119	0.0297936
SEC11C	chr18:054957488-054957547	-1.16339	0	chr9:127817471-127817530	chr9:127817471-127817530	-0.696742	0.0276997
chr18:071296334-071296393	chr18:071296334-071296393	-1.07163	0.001	CAMSAP1	chr9:137850906-137850965	-0.720779	0.0330022
NFATC1	chr18:075374474-075374533	-1.14607	0.007	chrX:039752897-039752946	chrX:039752897-039752946	-0.655096	0.0223709
chr19:000353206-000353263	chr19:000353206-000353263	-1.19588	0.003	BCOR	chrX:039835998-039836042	-0.610007	0.0356609
POLR2E-GPX4	chr19:001046511-001046555	1.25057	0.015	ZIC3	chrX:136477157-136477203	-0.591915	0.0297594
SEMA6B	chr19:004494289-004494348	-1.47049	0	PPP2R3B	chrY:000232922-000232980	-0.687154	0.0469084
JMJD2B	chr19:005025477-005025533	-1.08328	0.025	chrY:027182977-027183036	chrY:027182977-027183036	-0.762003	0.00629488
KHSRP	chr19:006365673-006365732	-1.22381	0.001
FLJ12949	chr19:010538076-010538125	-1.03099	0.007
ECSIT	chr19:011500637-011500681	-1.02582	0
SAMD1	chr19:014053202-014053247	-1.03268	0.012
COPE	chr19:018890816-018890863	-1.05602	0.01
CILP2	chr19:019510430-019510474	-1.01627	0.002
ANKRD27	chr19:037857258-037857313	-1.08464	0.002
KCTD15	chr19:038980539-038980598	-1.2644	0.001
ZNF30	chr19:040110091-040110150	-1.07641	0.008
ZNF146	chr19:041428167-041428211	1.41936	0.037
BCAT2	chr19:053990230-053990274	-1.43143	0.003
CD37	chr19:054533440-054533484	1.0783	0.023
LIM2	chr19:056589353-056589408	-1.27843	0.007
ZNF616	chr19:057334746-057334795	-1.23286	0.006
U2AF2	chr19:060859060-060859117	-1.05577	0
ZSCAN5	chr19:061420733-061420777	1.03806	0.023
ZNF274	chr19:063407845-063407904	-1.30476	0.001
chr2:000305222-000305281	chr2:000305222-000305281	-1.12065	0.03
KLF11	chr2:010100579-010100635	-1.32366	0.006
TRIB2	chr2:012776528-012776581	-1.1022	0.016
SF3B14	chr2:024152723-024152767	-1.23507	0
UCN	chr2:027383753-027383812	1.25862	0.036
CLIP4	chr2:029191393-029191445	2.50311	0.02
chr2:039041258-039041311	chr2:039041258-039041311	-1.00553	0.005
chr2:041922027-041922073	chr2:041922027-041922073	-1.04537	0.014
CCDC128	chr2:048521037-048521081	1.01599	0.002
JMJD1A	chr2:086521213-086521272	-1.17185	0
EIF2AK3	chr2:088630720-088630764	1.55871	0.001
chr2:088846602-088846646	chr2:088846602-088846646	-1.06899	0.001
KCNIP3	chr2:095375566-095375613	-1.10841	0.001
LIPT1	chr2:099137429-099137488	-1.09901	0.05
AFF3	chr2:099576534-099576580	-1.00616	0.003
POU3F3	chr2:104837357-104837403	-1.52673	0.022
chr2:118660231-118660285	chr2:118660231-118660285	-1.10374	0.003
ARHGEF4	chr2:131509716-131509768	-1.2216	0.001
RIF1	chr2:151974415-151974474	-1.00521	0.024
CDCA7	chr2:173928473-173928517	-1.22698	0.001
EVX2	chr2:176654668-176654727	-1.3871	0.001
HOXD8	chr2:176701659-176701709	1.03055	0.038
HOXD3	chr2:176736231-176736280	1.20321	0.025
HOXD3	chr2:176737609-176737653	1.08676	0.018
SATB2-FLJ32063	chr2:200034393-200034452	-1.21816	0.002
chr2:200424326-200424385	chr2:200424326-200424385	-1.13858	0.003
FZD7	chr2:202608786-202608830	1.22792	0.042
ICA1L	chr2:203445170-203445229	-1.04687	0.006
chr2:203587419-203587478	chr2:203587419-203587478	-1.12105	0.005
FZD5	chr2:208342033-208342077	-1.01821	0.004
RPE	chr2:210575330-210575385	-1.09625	0.014
chr2:213405029-213405073	chr2:213405029-213405073	-1.00846	0.005
BARD1	chr2:215382184-215382242	-1.03278	0.007
RQCD1	chr2:219142005-219142051	-1.15789	0.001
FLJ32447	chr2:222869658-222869717	-1.01822	0.003
WDFY1	chr2:224518465-224518524	-1.01155	0.008
chr2:234147597-234147647	chr2:234147597-234147647	-1.0216	0.004
TRPM8	chr2:234512656-234512715	-1.12787	0.037
GBX2	chr2:236745189-236745246	1.27076	0.013
CDC25B	chr20:003724542-003724586	-1.11603	0.002
C20orf103	chr20:009444734-009444784	1.06479	0.047
MKKS-C20orf94	chr20:010363012-010363071	-1.13466	0
C20orf23	chr20:016503445-016503492	1.00878	0.017
INSM1	chr20:020294776-020294835	-1.09145	0.009
NKX2-2	chr20:021436253-021436312	1.44802	0.015
NKX2-2	chr20:021437474-021437518	1.45855	0.026
C20orf112	chr20:030533780-030533839	-1.11476	0.005
SCAND1	chr20:034005973-034006017	-1.08967	0.002
L3MBTL	chr20:041570190-041570249	-1.02699	0
SLC12A5	chr20:044120523-044120567	1.09015	0.006
chr20:059032711-059032766	chr20:059032711-059032766	-1.00847	0.001
ADRM1	chr20:060311769-060311813	-1.01341	0.018
ZBTB46	chr20:061909476-061909535	-1.3239	0
PTTG1IP	chr21:045118619-045118676	-1.12351	0.001
COL6A1	chr21:046225512-046225571	-1.12208	0.001
C21orf56	chr21:046405883-046405927	-1.05211	0.002
SUHW2	chr22:021192581-021192636	-1.15906	0.006
SREBF2	chr22:040558801-040558847	-1.01691	0.003
chr22:041064721-041064780	chr22:041064721-041064780	-1.08506	0.043
FAM19A5	chr22:047533270-047533329	-1.16768	0.012
MKRN2	chr3:012574054-012574113	-1.07838	0
chr3:018461012-018461067	chr3:018461012-018461067	-1.05989	0
LRRFIP2	chr3:037192021-037192080	-1.19183	0.002
MOBP	chr3:039518690-039518738	1.52694	0.043
chr3:044013883-044013942	chr3:044013883-044013942	-1.15495	0.009
FLJ42117	chr3:059010345-059010398	-1.04886	0.009
WDR5B	chr3:123617314-123617369	-1.0312	0.047
TF	chr3:134985159-134985218	-1.11843	0.003
SOX14	chr3:138970217-138970263	1.57921	0.029
ZIC4	chr3:148599163-148599222	-1.38412	0.002
GP5	chr3:195600293-195600337	1.32227	0.005
PAK2	chr3:197950947-197951005	-1.10665	0.002
chr4:001039968-001040027	chr4:001039968-001040027	-1.01985	0.001
ABLIM2	chr4:008205178-008205227	-1.39977	0.004
HS3ST1	chr4:011038436-011038495	-1.03942	0.005
PHOX2B	chr4:041446947-041447006	-1.12127	0.013
chr4:041570155-041570205	chr4:041570155-041570205	2.02511	0.02
SPATA18	chr4:052637928-052637972	1.28055	0.025
KIT	chr4:055218054-055218103	1.09798	0.003
chr4:057105500-057105559	chr4:057105500-057105559	-1.18046	0.003
COX18	chr4:074153692-074153751	-1.01556	0.009
CXCL5	chr4:075083161-075083205	1.2906	0.037
RAP1GDS1	chr4:099402226-099402281	-1.03468	0.007
LEF1	chr4:109308182-109308233	-1.23215	0.007
ELOVL6	chr4:111338583-111338642	-1.01616	0.006
chr4:137496955-137497014	chr4:137496955-137497014	-1.35991	0.009
chr4:139701128-139701186	chr4:139701128-139701186	-1.03578	0.032
LOC441046	chr4:144699919-144699978	-1.02436	0
LSM6	chr4:147317014-147317068	-1.77471	0.001
EDNRA	chr4:148622227-148622279	-1.11288	0.009
chr4:171183285-171183344	chr4:171183285-171183344	-1.08355	0.01
HAND2	chr4:174688041-174688092	-1.05119	0.003
NEIL3	chr4:178467763-178467822	-1.14367	0.007
HELT	chr4:186174243-186174287	1.59471	0.031
chr4:190465488-190465538	chr4:190465488-190465538	-1.19218	0.023
MRPL36-NDUFS6	chr5:001853187-001853246	-1.01312	0.015
chr5:002165236-002165287	chr5:002165236-002165287	-1.04052	0.003
TRIO	chr5:014198376-014198431	-1.05712	0.013
TARS	chr5:033476474-033476518	-1.04522	0.001
MARVELD2	chr5:068747253-068747303	-1.08973	0.007
TNPO1	chr5:072179552-072179611	-1.01904	0.001
SV2C	chr5:075502307-075502366	-1.13301	0.002
chr5:092981977-092982036	chr5:092981977-092982036	-1.07852	0.011
ZH2C2	chr5:102483514-102483561	-1.09245	0.007
AFF4	chr5:132326605-132326664	-1.10119	0.018
CXCL14	chr5:134942914-134942958	1.0185	0.024
PCDHA8	chr5:140201558-140201602	-1.01502	0.038
TAF7	chr5:140680004-140680063	-1.26861	0.001
PCDHGC3	chr5:140838309-140838368	1.22339	0.043
KCTD16	chr5:143565064-143565123	-1.02419	0.001
SH3RF2	chr5:145296289-145296343	-1.26227	0.001
POU4F3	chr5:145702969-145703013	1.39335	0.016
GLRA1	chr5:151284538-151284586	-1.08151	0.04
EBF1	chr5:158464953-158465003	1.74173	0
NKX2-5	chr5:172593751-172593810	1.07639	0.026
chr5:172605589-172605640	chr5:172605589-172605640	1.44355	0.028
SFXN1	chr5:174838090-174838134	-1.10909	0.006
CPLX2	chr5:175232385-175232444	-1.20125	0.007
UBXD8	chr5:175807731-175807780	-1.19705	0.001
chr5:177546600-177546659	chr5:177546600-177546659	-1.04577	0.012
FOXC1	chr6:001558534-001558593	-1.17914	0.004
SERPINB6	chr6:002915995-002916054	-1.08363	0.017
chr6:006003664-006003723	chr6:006003664-006003723	-1.24555	0.01
chr6:010428047-010428106	chr6:010428047-010428106	-1.03982	0.004
HIST1H2BD	chr6:026279962-026280020	1.68093	0.021
HIST1H2BE	chr6:026292376-026292425	1.04217	0.018
chr6:027172564-027172610	chr6:027172564-027172610	1.52845	0.002
chr6:027571183-027571227	chr6:027571183-027571227	1.41606	0.007
HIST1H1B	chr6:027943285-027943341	1.73704	0.016
ZNF96	chr6:028475128-028475172	1.82355	0.023
TRIM26	chr6:030289419-030289470	-1.10064	0.001
RPP21	chr6:030420787-030420831	-1.24304	0.004
IER3	chr6:030819402-030819461	-1.2326	0.001
BAT2	chr6:031695685-031695744	-1.20905	0.007
TFAP2B	chr6:050918953-050919000	1.1505	0.017
COL9A1	chr6:071049362-071049409	1.93653	0.016
chr6:074065521-074065567	chr6:074065521-074065567	1.03966	0.024
chr6:074081375-074081424	chr6:074081375-074081424	1.80367	0.025
HTR1B	chr6:078230176-078230222	-1.26822	0.001
U50B	chr6:086444639-086444693	-1.18172	0.008
KIAA0776	chr6:097076872-097076931	-1.02123	0.027
POU3F2	chr6:099396885-099396944	-1.05456	0.029
SIM1	chr6:101019421-101019479	1.22832	0.026
SLC22A16	chr6:110904929-110904988	-1.10115	0.005
PTPRK	chr6:128882593-128882642	-1.04129	0.004
PEX7	chr6:137186152-137186211	-1.07713	0.004
WDR27	chr6:169804442-169804501	-1.10051	0.021
C6orf208	chr6:169932193-169932248	-1.05548	0
UNCX4.1	chr7:001240405-001240464	-1.07637	0.005
UNCX4.1	chr7:001252491-001252550	1.21399	0.027
MICALL2	chr7:001465530-001465574	-1.01367	0
FOXK1	chr7:004769186-004769245	-1.1299	0.006
IGF2BP3	chr7:023480983-023481042	-1.18785	0.005
HOXA3	chr7:027128548-027128605	-1.04564	0.01
HOXA11	chr7:027192107-027192151	-1.47639	0.005
HOXA11	chr7:027195224-027195268	-1.33699	0.027
TAX1BP1	chr7:027747181-027747240	-1.01112	0
chr7:039839250-039839309	chr7:039839250-039839309	-1.03547	0
ACA9	chr7:044992436-044992483	-1.12686	0.003
GTF2I	chr7:073711030-073711085	-1.03077	0
KRIT1	chr7:091712621-091712678	-1.11499	0.009
LMTK2	chr7:097638660-097638719	-1.30288	0.001
ARPC1B	chr7:098809617-098809675	-1.10123	0.013
TES	chr7:115637521-115637576	-1.07509	0.001
FEZF1	chr7:121727241-121727285	1.32292	0.037
IMPDH1	chr7:127836750-127836801	-1.01733	0.005
chr7:130442577-130442636	chr7:130442577-130442636	-1.29231	0
PLXNA4B	chr7:131911291-131911335	1.07043	0.002
LUC7L2	chr7:138694499-138694551	-1.00393	0.006
KIAA0738	chr7:143213572-143213631	-1.12017	0.018
ZNF282	chr7:148554156-148554215	-1.23624	0.006
WDR86	chr7:150737085-150737144	-1.49791	0.002
PRKAG2	chr7:151204926-151204978	-1.1275	0
chr7:154858821-154858865	chr7:154858821-154858865	1.11553	0.05
HLXB9	chr7:156490392-156490451	1.23468	0.046
HLXB9	chr7:156497211-156497270	-1.18613	0.001
HLXB9	chr7:156504283-156504342	-1.04857	0.011
chr7:157172651-157172710	chr7:157172651-157172710	-1.09825	0.012
chr7:157176818-157176869	chr7:157176818-157176869	-1.01438	0.011
chr7:157286916-157286975	chr7:157286916-157286975	-1.03981	0.025
chr7:157383265-157383320	chr7:157383265-157383320	-1.04675	0.021
chr8:000837494-000837553	chr8:000837494-000837553	-1.00849	0.048
chr8:001100926-001100973	chr8:001100926-001100973	1.0943	0.031
MYOM2	chr8:002065856-002065915	-1.39903	0
chr8:002229767-002229826	chr8:002229767-002229826	-1.17626	0.032
CSMD1	chr8:004836320-004836365	-1.08121	0.001
chr8:011575808-011575856	chr8:011575808-011575856	-1.02436	0.017
chr8:023620399-023620443	chr8:023620399-023620443	1.01135	0.026
ELP3	chr8:028006725-028006770	-1.14386	0.001
SNAI2	chr8:049986128-049986187	-1.37235	0.011
SNTG1	chr8:050984745-050984804	-1.22672	0.008
chr8:061997793-061997850	chr8:061997793-061997850	-1.02872	0.006
FAM82B-CPNE3	chr8:087590290-087590344	-1.00359	0.008
OTUD6B	chr8:092151946-092151992	-1.02087	0.027
chr8:103682145-103682192	chr8:103682145-103682192	1.09455	0.024
TRPS1	chr8:116749135-116749188	1.03912	0.033
TRPS1	chr8:116750689-116750745	-1.09125	0.008
MYC	chr8:128815682-128815741	-1.08588	0.014
ANKRD15	chr9:000495767-000495821	-1.57074	0
SMARCA2	chr9:002037850-002037909	-1.43727	0
UHRF2	chr9:006402334-006402381	-1.01505	0.008
chr9:014338713-014338757	chr9:014338713-014338757	-1.00724	0.008
chr9:018428589-018428635	chr9:018428589-018428635	1.09163	0.022
KLHL9	chr9:021325612-021325671	-1.01614	0.002
CDKN2A	chr9:021958245-021958292	1.08104	0.008
C9orf82	chr9:026882194-026882245	-1.13837	0.003
PLAA-IFT74	chr9:026946241-026946299	-1.04608	0.035
chr9:029204991-029205036	chr9:029204991-029205036	1.09186	0.04
FOXB2	chr9:078825797-078825846	-1.02639	0
chr9:092920282-092920341	chr9:092920282-092920341	-1.3977	0.007
IARS	chr9:094095481-094095540	-1.02733	0.013
NOL8	chr9:094127829-094127877	-1.07653	0.007
ANP32B	chr9:099787593-099787648	-1.30593	0.009
RAB14	chr9:123004279-123004333	-1.10981	0.006
LHX6	chr9:124029731-124029789	-1.18644	0.023
LHX2	chr9:125818882-125818935	1.00041	0.017
NR5A1	chr9:126289493-126289551	-1.03573	0.01
HSPA5	chr9:127042748-127042793	-1.36651	0.003
chr9:127817471-127817530	chr9:127817471-127817530	-1.19844	0
PRDM12	chr9:132530595-132530654	-1.06299	0.012
CAMSAP1	chr9:137850906-137850965	-1.19224	0.002
ARX	chrX:024931794-024931853	-1.01222	0.02
chrX:039752897-039752946	chrX:039752897-039752946	-1.0679	0.001
BCOR	chrX:039835998-039836042	-1.05602	0.009
chrX:064544802-064544856	chrX:064544802-064544856	-1.12441	0.002
OGT	chrX:070669268-070669327	-1.01166	0.048
PPP2R3B	chrY:000232922-000232980	-1.1613	0.006
chrY:027182977-027183036	chrY:027182977-027183036	-1.03147	0.004
