# Supplementary material for: Altered DNA Methylation Landscapes of Polycomb-Repressed Loci Are Associated with Prostate Cancer Progression and ERG Oncogene Expression in Prostate Cancer
Source: Oxford University Press journal article supplement (doi:10.1158/1078-0432.ccr-12-3139), 2013-04-02
Supplement: 10780432ccr123139-sup-supplementary_table_2_xlsx_file_17k.xlsx [file 10780432ccr123139-sup-supplementary_table_2_xlsx_file_17k.xlsx]

## Sheet: Sheet1
Sample Number	ERG expression status (0 - negative; 1 - positive)	Stage	Gleason Score	Primary + Secondary Gleason Pattern	Surgicals Margins	Metastasis	Zones
1	N/A	pT3a	6	3+3	negative	Unknown	Peripheral, Central
2	0	pT2	6	3+3	negative	Unknown	Peripheral
3	1	pT2	6	3+3	negative	Unknown	Peripheral
4	0	pT2	6	3+3	positive	Unknown	Peripheral, transitional
5	0	pT3a	6	3+3	negative	Unknown	Peripheral, transitional
6	1	pT2	6	3+3	negative	Unknown	Peripheral
7	0	pT2	6	3+3	negative	Unknown	Peripheral
8	0	pT2	6	3+3	positive	Negative	Peripheral, transitional, central
9	1	pT2	6	3+3	negative	Negative	Peripheral, transitional
10	0	pT2	6	3+3	positive	Unknown	Peripheral
11	1	pT3b	7	3+4	negative	Unknown	Unknown
12	1	pT2	7	3+4	negative	Unknown	Peripheral
13	1	pT3a	7	3+4	positive	Unknown	Peripheral, transitional
14	0	pT2	7	3+4	negative	Unknown	Unknown
16	0	pT2	7	3+4	positive	Unknown	Peripheral
17	1	pT3b	7	3+4	negative	Lymph Node Met	Peripheral, Central
18	0	pT2	7	3+4	negative	Unknown	Peripheral
19	N/A	pT3a	7	3+4	negative	Unknown	Peripheral, transitional, central
20	1	pT2	7	3+4	negative	Unknown	Peripheral
21	0	pT2	7	3+4	negative	Unknown	Peripheral
22	1	pT3a	7	4+3	negative	Lymph Node Met	Unknown
23	0	pT3a	7	4+3	negative	Lymph Node Met	Unknown
24	1	pT2	7	4+3	positive	Unknown	Peripheral
25	N/A	pT3a	7	4+3	negative	Unknown	Peripheral, central
26	0	pT3a	7	4+3	negative	Unknown	Peripheral, transitional
27	0	pT3a	7	4+3	negative	Negative	Unknown
28	0	pT3a	7	4+3	negative	Unknown	Unknown
29	0	pT3b	7	4+3	negative	Unknown	Peripheral
30	1	pT3b	7	4+3	positive	Negative	Unknown
31	1	pT3b	8	4+4	positive	Lymph Node Met	Peripheral, central
32	1	pT3a	8	4+4	negative	Unknown	Unknown
33	N/A	pT4	8	4+4	positive	Negative	Unknown
34	0	pT2	8	4+4	negative	Unknown	Unknown
35	1	pT3a	8	4+4	negative	Negative	Unknown
36	N/A	pT3a	9	4+5	negative	Unknown	Peripheral
37	1	pT3b	9	5+4	positive	Negative	Unknown
38	1	pT3a	9	4+5	negative	Unknown	Unknown
39	0	pT3b	9	4+5	positive	Lymph Node Met	Unknown
40	0	pT3b	9	4+5	positive	Negative	Unknown
