# Supplementary material for: Altered DNA Methylation Landscapes of Polycomb-Repressed Loci Are Associated with Prostate Cancer Progression and ERG Oncogene Expression in Prostate Cancer
Source: Oxford University Press journal article supplement (doi:10.1158/1078-0432.ccr-12-3139), 2013-04-02
Supplement: 10780432ccr123139-sup-supplementary_table_3_xlsx_file_76k.xlsx [file 10780432ccr123139-sup-supplementary_table_3_xlsx_file_76k.xlsx]

## Sheet: Sheet1
ERG positive vs. ERG negative				ERG negative/GS associated				ERG positive/GS associated
Symbol	Probe Location	ERG positive vs ERG negative	T-test p-value	GeneSymbol	Probe Location	GS6 vs GS7-10 Fold Change	ANOVA p-value	GeneSymbol	Probe Location	GS6 vs GS7-10 Fold Change	ANOVA p-value
CACNA1D	chr3:053505074-053505118	-1.77491	0.000458426	NPR3	chr5:032749064-032749109	-2.29485	0.029	chr1:002836834-002836883	chr1:002836834-002836883	1.55039	0.003
GREM1	chr15:030798699-030798744	-1.43991	0.000139185	hsa-mir-137	chr1:098291535-098291591	-1.84106	0.048	PRDM16	chr1:003018459-003018518	-1.13646	0.021
CACNA1D	chr3:053505179-053505234	-1.43306	0.00467714	VGLL2	chr6:117691542-117691586	-1.8176	0.008	PRDM16	chr1:003062126-003062182	1.0793	0.025
SP8	chr7:020789743-020789797	-1.42028	0.00298429	HOXA11	chr7:027195224-027195268	-1.80227	0.011	ICMT-HES3	chr1:006224234-006224278	1.10106	0.016
TMEM26	chr10:062882522-062882567	-1.372	0.0184186	NR4A2	chr2:156884513-156884557	-1.70759	0.011	CAMTA1	chr1:006766788-006766847	-1.25403	0.044
chr16:012905247-012905306	chr16:012905247-012905306	-1.3497	0.0150673	FOXD3	chr1:063558298-063558357	-1.66856	0.002	C1orf126-TMEM51	chr1:015352409-015352456	-1.29766	0.009
HEXA	chr15:070455213-070455261	-1.3425	0.00605598	chr13:111675356-111675415	chr13:111675356-111675415	-1.6592	0.004	PAX7	chr1:018830922-018830966	1.10572	0.033
TFAP2A	chr6:010518578-010518630	-1.30598	0.00837655	MYOM2	chr8:002065856-002065915	-1.62018	0.001	FAM46B	chr1:027211536-027211580	-1.07454	0.037
RAB6B	chr3:135097860-135097904	-1.29982	0.000515299	EVX2	chr2:176654569-176654628	-1.60879	0.031	EPB41	chr1:029114616-029114670	-1.00656	0.024
CDC42BPA	chr1:225573376-225573433	-1.2867	0.00174455	chr5:002696343-002696402	chr5:002696343-002696402	-1.6071	0.013	TTMB	chr1:029322540-029322584	-1.31779	0.028
DKFZP586H2123	chr11:035503630-035503676	-1.27554	0.00636935	chr8:011508359-011508418	chr8:011508359-011508418	-1.60154	0.039	RBBP4	chr1:032889658-032889702	-1.11753	0.007
chrY:019698857-019698901	chrY:019698857-019698901	-1.23094	0.0383773	PAP2D	chr1:099243602-099243661	-1.5773	0.016	COL9A2	chr1:040553829-040553873	1.09618	0.008
HHEX	chr10:094438777-094438824	-1.22886	0.0018775	LEMD2	chr6:033847540-033847584	-1.54705	0.002	ZNF684	chr1:040769654-040769713	-1.09105	0.023
BNC2	chr9:016818882-016818933	-1.19752	0.00646259	chr14:036044192-036044251	chr14:036044192-036044251	-1.51844	0.004	FAM80A	chr1:042619560-042619619	-1.20835	0.006
PODXL	chr7:130893127-130893182	-1.1573	0.0318988	chr10:000449644-000449696	chr10:000449644-000449696	-1.49132	0.021	U55	chr1:045014061-045014105	-1.08052	0.032
chr6:013877712-013877756	chr6:013877712-013877756	-1.1494	0.0462271	LIM2	chr19:056589353-056589408	-1.48522	0.001	NSUN4	chr1:046579132-046579176	-1.04729	0.045
CALCA	chr11:014950216-014950269	-1.14892	0.0324093	PIGC	chr1:170679378-170679437	-1.47782	0.018	FAAH	chr1:046632434-046632478	-1.18238	0
GPR161	chr1:166371865-166371912	-1.13448	0.00756575	SIM1	chr6:101010355-101010399	-1.46645	0.046	FOXD2	chr1:047683421-047683465	1.70809	0.015
DLX1	chr2:172659675-172659727	-1.07984	0.0205166	PPP6C	chr9:126991135-126991189	-1.46002	0.015	GLIS1	chr1:053975901-053975956	-1.20296	0.025
HOXA13	chr7:027210988-027211032	-1.072	0.0225796	chr12:123789559-123789609	chr12:123789559-123789609	-1.45906	0.028	PCSK9	chr1:055277789-055277833	-1.18081	0.005
TOR1AIP2	chr1:178113462-178113519	-1.05909	0.000858297	CDYL	chr6:004720023-004720067	-1.44691	0.022	chr1:061281444-061281488	chr1:061281444-061281488	-1.05368	0.047
CYP1A1	chr15:072806266-072806318	-1.03781	0.0223683	chr13:111943320-111943379	chr13:111943320-111943379	-1.44552	0.041	chr1:061292415-061292474	chr1:061292415-061292474	-1.18985	0.001
TMLHE	chrX:154495300-154495344	-1.01318	0.0330011	SNTG1	chr8:050984745-050984804	-1.41686	0.004	FOXD3	chr1:063558407-063558451	1.36576	0.012
chr16:084539174-084539218	chr16:084539174-084539218	1.00251	0.000632464	chr4:038848520-038848579	chr4:038848520-038848579	-1.41234	0.007	FOXD3	chr1:063560688-063560734	-1.15719	0.011
ONECUT2	chr18:053257703-053257762	1.0044	0.0233475	ICMT-HES3	chr1:006224560-006224619	-1.40814	0.038	FOXD3	chr1:063561723-063561767	1.22986	0.039
ZBTB46	chr20:061873561-061873620	1.00471	0.000914324	SESN2	chr1:028458369-028458415	-1.40013	0.001	FOXD3	chr1:063568726-063568770	1.93993	0.009
CDX4	chrX:072583807-072583855	1.00763	0.00610549	CTSC	chr11:087710096-087710153	-1.39865	0.003	LRRC40	chr1:070443709-070443753	-1.01497	0.02
FOXD3	chr1:063558671-063558715	1.01143	0.000143594	FMNL3	chr12:048387881-048387940	-1.39354	0.015	FUBP1	chr1:078216783-078216842	-1.45582	0.021
TRIM67	chr1:229363496-229363555	1.01414	0.0221578	ACA28	chr14:102871292-102871347	-1.38941	0.006	MCOLN2	chr1:085235241-085235285	-1.25609	0.028
chrY:000294404-000294447	chrY:000294404-000294447	1.01765	0.00547917	ABLIM2	chr4:008205178-008205227	-1.38448	0.001	BARHL2	chr1:090954722-090954767	1.21172	0.016
chr12:129737545-129737604	chr12:129737545-129737604	1.01828	0.00215173	TFAP2D	chr6:050800051-050800110	-1.38199	0.019	BARHL2	chr1:090964071-090964125	1.52397	0.029
chr8:023619540-023619589	chr8:023619540-023619589	1.01963	0.0315857	LARP5	chr10:000845572-000845631	-1.37577	0.034	BARHL2	chr1:090965322-090965366	1.91684	0.016
NPR3	chr5:032749167-032749216	1.0199	0.0404668	TBR1	chr2:161981437-161981481	-1.36964	0.023	GCLM	chr1:094148049-094148103	-1.03778	0.004
SIM1	chr6:101022385-101022430	1.02435	0.0144714	chr12:113620499-113620554	chr12:113620499-113620554	-1.36953	0.015	GPR88	chr1:100778425-100778469	-1.3909	0.004
PRDM16	chr1:003070959-003071005	1.02758	0.000969612	chr13:049598601-049598645	chr13:049598601-049598645	-1.35529	0.004	RNPC3	chr1:103840965-103841014	-1.10202	0.02
FOXD3	chr1:063557661-063557720	1.03081	0.00333128	chr11:128739578-128739637	chr11:128739578-128739637	-1.35302	0.021	RAP1A	chr1:111963661-111963714	-1.29361	0.039
chr19:051274273-051274321	chr19:051274273-051274321	1.03157	0.00678829	CDH13	chr16:081218594-081218638	-1.35283	0.002	VANGL1	chr1:115987002-115987055	-1.14845	0.016
SPATA18	chr4:052637928-052637972	1.04276	0.00436246	BCAT2	chr19:053990230-053990274	-1.3426	0.034	chr1:116511581-116511640	chr1:116511581-116511640	-1.11182	0.046
COL9A1	chr6:071049362-071049409	1.0451	0.0353502	ATRNL1	chr10:116844122-116844181	-1.33506	0.037	TBX15	chr1:119328463-119328513	1.84432	0.025
chrY:000378309-000378354	chrY:000378309-000378354	1.04623	0.0029453	MGC4655	chr16:065741252-065741302	-1.33039	0.002	TBX15	chr1:119337255-119337299	1.72533	0.031
chr5:072562288-072562336	chr5:072562288-072562336	1.04645	0.0159937	chr19:000353206-000353263	chr19:000353206-000353263	-1.32777	0.013	chr1:119344681-119344725	chr1:119344681-119344725	2.34466	0.001
FOXD1	chr5:072776537-072776581	1.0496	0.0211968	NIPA1	chr15:020636763-020636822	-1.32774	0.015	chr1:144702121-144702166	chr1:144702121-144702166	1.91771	0.022
WIT1	chr11:032417270-032417314	1.05016	0.030367	EIF3S9	chr7:002360522-002360571	-1.3239	0.002	chr1:146185079-146185132	chr1:146185079-146185132	2.11623	0.027
ACTA1	chr1:227635972-227636018	1.05164	0.0112415	TRPM8	chr2:234512656-234512715	-1.30809	0.024	chr1:146242223-146242270	chr1:146242223-146242270	1.71918	0.018
chr3:182927308-182927365	chr3:182927308-182927365	1.05363	0.00500508	ATG12	chr5:115205146-115205190	-1.30419	0	chr1:147422887-147422931	chr1:147422887-147422931	1.17061	0.006
EBF2	chr8:025965385-025965440	1.05629	0.0247308	PCSK5	chr9:077694957-077695016	-1.30385	0.018	HIST2H2AC	chr1:148125567-148125625	-1.27782	0.002
WT1	chr11:032406324-032406369	1.0654	0.0101463	ACA9	chr7:044992436-044992483	-1.30046	0.002	SEMA6C	chr1:149370860-149370910	-1.01238	0.035
SIX2	chr2:045081096-045081146	1.06985	0.00427428	LSM6	chr4:147317014-147317068	-1.28709	0.012	TDRKH	chr1:150030074-150030124	-1.12676	0.039
COL9A2	chr1:040553618-040553662	1.07263	0.00029081	ANKRD15	chr9:000495767-000495821	-1.28285	0.006	CHRNB2	chr1:152807105-152807149	-1.06691	0.043
chr1:227610207-227610257	chr1:227610207-227610257	1.07367	0.00100513	chr11:022807291-022807350	chr11:022807291-022807350	-1.27283	0.004	hsa-mir-9-1	chr1:154657490-154657535	-1.21722	0.025
SHOX	chrY:000501132-000501175	1.07501	0.0296475	SATB2-FLJ32063	chr2:200033461-200033520	-1.26762	0.009	chr1:154693626-154693672	chr1:154693626-154693672	-1.08295	0.033
HAND2	chr4:174688314-174688373	1.0823	0.0063016	GPRC5A	chr12:012935992-012936051	-1.26632	0.027	NUF2	chr1:161558376-161558427	-1.05493	0.049
ZIC2	chr13:099439850-099439909	1.08376	0.0102965	OSBP2	chr22:029420104-029420148	-1.266	0.002	LMX1A	chr1:163590167-163590226	1.85191	0.03
NFIX	chr19:012984795-012984847	1.08436	0.0252674	GHSR	chr3:173650553-173650604	-1.26507	0.017	C1orf32	chr1:165183668-165183719	2.31223	0.014
VWC2	chr7:049785271-049785324	1.09453	0.0174472	chr17:000660403-000660462	chr17:000660403-000660462	-1.26417	0.003	C1orf125	chr1:177601540-177601599	-1.21213	0.001
EN2	chr7:154941264-154941315	1.10362	0.00646214	chr13:094417813-094417863	chr13:094417813-094417863	-1.26045	0.027	RGS2	chr1:191044268-191044318	-1.28317	0.011
PHOX2B	chr4:041443908-041443957	1.10686	0.0307438	chr17:058398054-058398100	chr17:058398054-058398100	-1.2593	0.025	NR5A2	chr1:198271594-198271640	1.90939	0.032
TBX15	chr1:119328463-119328513	1.12114	0.0316637	POFUT2	chr21:045539664-045539719	-1.25727	0.005	NR5A2	chr1:198278037-198278081	1.00035	0.032
MEIS2	chr15:035177455-035177499	1.13211	0.0340604	ZNF528	chr19:057592660-057592719	-1.25713	0	NAV1	chr1:199884747-199884791	-1.18864	0.039
chr1:090965401-090965446	chr1:090965401-090965446	1.13635	0.000458337	SIM1	chr6:101022385-101022430	-1.25503	0.048	NUCKS1	chr1:203984965-203985017	-1.03591	0.016
LRRTM1	chr2:080383855-080383900	1.13996	0.019841	PRKCE	chr2:045732845-045732889	-1.25398	0.036	NENF	chr1:210672648-210672707	-1.36806	0.011
chr11:018187243-018187287	chr11:018187243-018187287	1.14239	0.000776161	MMP9	chr20:044076566-044076616	-1.25346	0.028	VASH2	chr1:211190479-211190523	-1.20073	0.022
chr7:154858707-154858754	chr7:154858707-154858754	1.14396	0.0238651	FEZF2	chr3:062333716-062333765	-1.25272	0.033	chr1:211629644-211629696	chr1:211629644-211629696	1.10026	0.004
chr5:077183344-077183392	chr5:077183344-077183392	1.14616	0.00085736	DMRT3	chr9:000966072-000966131	-1.25032	0	PROX1	chr1:212225611-212225655	1.35703	0.031
chr15:087753392-087753436	chr15:087753392-087753436	1.15134	0.0242861	chr9:127817471-127817530	chr9:127817471-127817530	-1.24959	0.001	RRP15	chr1:216525309-216525365	-1.0763	0.035
SIM1	chr6:101001654-101001713	1.161	0.00146813	chr7:104729264-104729323	chr7:104729264-104729323	-1.24958	0.05	HLX1	chr1:219131637-219131681	1.18886	0.029
NKX2-2	chr20:021438487-021438538	1.17017	0.0490734	chr2:203587419-203587478	chr2:203587419-203587478	-1.24932	0.013	chr1:219135440-219135484	chr1:219135440-219135484	1.1718	0.016
WIT1	chr11:032416461-032416505	1.17108	0.00228177	chr5:072565746-072565805	chr5:072565746-072565805	-1.24871	0.023	TMEM63A	chr1:224137356-224137400	-1.10561	0.005
FLJ32063	chr2:200043978-200044031	1.17815	0.00243619	OTUD6B	chr8:092151946-092151992	-1.24801	0.033	SDCCAG8	chr1:241704774-241704827	-1.13556	0.043
GPR50	chrX:150093946-150093992	1.18723	0.0350587	METT10D	chr17:002361731-002361776	-1.24731	0.012	SDCCAG8	chr1:241712961-241713020	-1.1753	0.04
BARHL2	chr1:090965044-090965088	1.19212	0.00119718	FGF8	chr10:103529980-103530024	-1.24724	0.022	AKT3	chr1:242081273-242081332	-1.59595	0.004
KLK10	chr19:056214354-056214398	1.20891	0.00343665	chr2:039041258-039041311	chr2:039041258-039041311	-1.24606	0.002	ADSS-C1orf101	chr1:242691047-242691102	-1.14239	0
GEFT	chr12:056290473-056290517	1.2142	0.00233662	CARM1	chr19:010842397-010842456	-1.2443	0.025	chr1:247134240-247134299	chr1:247134240-247134299	-1.06024	0.047
FOXB2	chr9:078818692-078818736	1.21785	0.0130634	BCOR	chrX:039835998-039836042	-1.24421	0.02	chr10:000515646-000515705	chr10:000515646-000515705	-1.02523	0.015
PRDM16	chr1:003061865-003061909	1.21974	6.21203e-05	chr17:072179626-072179682	chr17:072179626-072179682	-1.24302	0.004	chr10:002533427-002533478	chr10:002533427-002533478	1.64268	0.001
chr6:072355270-072355314	chr6:072355270-072355314	1.22325	0.00916114	chr10:022582781-022582840	chr10:022582781-022582840	-1.23758	0.001	chr10:011692930-011692981	chr10:011692930-011692981	1.07168	0.029
WNT16	chr7:120757844-120757888	1.22464	0.00826195	LRFN5	chr14:041137112-041137171	-1.22433	0.02	C10orf38	chr10:015294510-015294569	-1.05289	0.023
VAX1	chr10:118882367-118882411	1.22843	0.0261365	NKX2-2	chr20:021444623-021444679	-1.22391	0.001	PLXDC2	chr10:020146049-020146096	-1.01627	0.047
LBX1	chr10:102986568-102986612	1.22992	0.00244951	LIPT1	chr2:099137429-099137488	-1.22334	0.038	chr10:022557964-022558023	chr10:022557964-022558023	-1.0563	0.027
chr13:111010216-111010263	chr13:111010216-111010263	1.23054	0.000151964	RSF1	chr11:077202552-077202611	-1.21975	0.043	ARHGAP21	chr10:025051908-025051952	-1.03201	0.028
WT1	chr11:032409090-032409134	1.23945	0.00220612	IRGQ	chr19:048790729-048790773	-1.21871	0.018	BAMBI	chr10:028997336-028997395	-1.25207	0.016
LRP1B	chr2:142605025-142605075	1.24302	0.0398691	IER3	chr6:030819402-030819461	-1.21485	0.005	MAP3K8	chr10:030762647-030762691	-1.17425	0.029
chr1:226724189-226724244	chr1:226724189-226724244	1.26118	0.00346975	MIER1	chr1:067169129-067169188	-1.21356	0.003	ARHGAP12	chr10:032257991-032258042	-1.52835	0.003
DLX4	chr17:045397160-045397219	1.26692	0.000278628	SLC25A24	chr1:108543860-108543919	-1.21286	0.005	ATOH7	chr10:069661531-069661590	-1.29497	0.011
LIN28B	chr6:105507829-105507874	1.27006	0.00359377	IMPDH1	chr7:127836750-127836801	-1.21039	0.001	MMRN2	chr10:088693018-088693068	-1.11789	0.011
chr9:071216606-071216665	chr9:071216606-071216665	1.27033	0.00339078	chr11:115956262-115956321	chr11:115956262-115956321	-1.20493	0.014	FAS	chr10:090741143-090741197	-1.20008	0.029
PCDHGA7	chr5:140742599-140742643	1.27309	0.0158633	HIST1H1C	chr6:026164786-026164839	-1.20102	0.005	hsa-mir-607-LCOR	chr10:098582104-098582148	-1.47613	0.002
chr20:020948765-020948809	chr20:020948765-020948809	1.27502	0.00599364	chr12:073217667-073217726	chr12:073217667-073217726	-1.1987	0.005	chr10:101271182-101271226	chr10:101271182-101271226	1.00758	0.042
IRS4	chrX:107862945-107862989	1.28494	0.000382304	chr10:053840671-053840730	chr10:053840671-053840730	-1.19502	0.005	NKX2-3	chr10:101279919-101279968	1.60193	0.033
FOXD3	chr1:063568726-063568770	1.28791	0.00265389	MAP7	chr6:136912487-136912543	-1.19464	0.022	CNNM2	chr10:104667579-104667623	-1.01619	0.027
TWIST1	chr7:019118701-019118745	1.29447	0.000802628	BARHL2	chr1:090964439-090964487	-1.19117	0.034	ADRA2A	chr10:112827197-112827241	-1.10421	0.011
CHRM1	chr11:062447967-062448011	1.29678	0.000102321	ATP5H	chr17:070542747-070542791	-1.19071	0.015	TRUB1	chr10:116687774-116687833	-1.37875	0.01
chr5:043030541-043030585	chr5:043030541-043030585	1.30604	0.0226988	GJA3	chr13:019634011-019634059	-1.19018	0.038	PNLIPRP2	chr10:118377482-118377541	-1.13875	0.049
ZNF96	chr6:028475128-028475172	1.30754	0.00794105	VWA2	chr10:115988916-115988975	-1.19018	0.013	chr10:119484822-119484866	chr10:119484822-119484866	1.11401	0.023
GALNT17	chr4:172970213-172970260	1.311	0.00100147	chr2:000305222-000305281	chr2:000305222-000305281	-1.18793	0.025	ADAM12	chr10:128067511-128067570	-1.03422	0.004
DCHS2	chr4:155473502-155473553	1.31507	0.0133037	chr12:129754079-129754123	chr12:129754079-129754123	-1.1854	0.046	chr10:134571933-134571984	chr10:134571933-134571984	1.23206	0.011
TWIST1	chr7:019112356-019112414	1.31928	0.00893132	chr16:087598044-087598103	chr16:087598044-087598103	-1.18091	0.02	KNDC1	chr10:134843054-134843108	1.2352	0.048
chr6:033192780-033192824	chr6:033192780-033192824	1.32668	0.00376146	WBP11	chr12:014847155-014847213	-1.17707	0.011	TOLLIP	chr11:001268194-001268242	-1.11933	0.022
FEZF2	chr3:062331048-062331102	1.34958	0.00092186	KIAA0701	chr12:099059987-099060036	-1.17382	0.036	ZBED5	chr11:010836689-010836739	-1.06209	0.013
HIST1H3G-HIST1H2BI	chr6:026380459-026380505	1.35719	0.00450092	chr17:073301169-073301228	chr17:073301169-073301228	-1.17315	0.038	DBX1	chr11:020141477-020141521	1.77546	0.041
chr5:154007039-154007085	chr5:154007039-154007085	1.36122	0.0206069	IRAK1BP1	chr6:079634508-079634567	-1.17266	0.001	GAS2	chr11:022644799-022644854	-1.56481	0.008
chr4:041570155-041570205	chr4:041570155-041570205	1.37211	0.0119453	CPLX2	chr5:175232385-175232444	-1.17248	0.006	BDNF	chr11:027700138-027700194	1.20957	0.047
CPNE4	chr3:133236845-133236899	1.3862	0.00316273	ELMOD1	chr11:106967227-106967271	-1.16949	0.003	PAX6	chr11:031791331-031791375	-1.0824	0.011
IRX1	chr5:003650576-003650630	1.4015	0.00740124	PRPF4B	chr6:003963378-003963437	-1.16746	0.047	WT1	chr11:032408948-032408999	1.49758	0.007
PAX9	chr14:036197562-036197606	1.41962	0.000512911	TAF7	chr5:140680004-140680063	-1.16726	0.017	WT1	chr11:032411345-032411400	2.42959	0.03
SOX17	chr8:055530161-055530220	1.42265	0.0132448	LHX9	chr1:196154463-196154522	-1.16716	0.013	WIT1	chr11:032417270-032417314	2.06908	0.023
chr17:072179544-072179588	chr17:072179544-072179588	1.42553	0.0223068	EBF3	chr10:131587388-131587447	-1.16259	0.004	ALX4	chr11:044283930-044283979	1.66334	0.009
chr10:031463362-031463410	chr10:031463362-031463410	1.43681	0.000374712	MIPOL1	chr14:036737268-036737320	-1.16087	0.034	PRPF19-TMEM109	chr11:060438164-060438208	-1.03462	0.027
TEPP	chr16:056577078-056577137	1.46676	0.00611949	PCDHGA2	chr5:140699583-140699642	-1.15906	0.047	MAP3K11	chr11:065139657-065139701	-1.20678	0.042
SIM1	chr6:101004020-101004064	1.48349	0.00871438	ATOH1	chr4:094974739-094974794	-1.15801	0.026	CFL1-MUS81	chr11:065383203-065383251	-1.10924	0.021
HTR1B	chr6:078228956-078229002	1.51388	0.00688084	PTPRG	chr3:061521667-061521726	-1.15724	0.003	RBM4	chr11:066163129-066163174	-1.05155	0.039
PAX3	chr2:222876845-222876895	1.53065	0.00982474	RAB14	chr9:123004279-123004333	-1.15387	0.015	CCND1	chr11:069163918-069163977	-1.12088	0.041
NR4A2	chr2:156884703-156884747	1.53354	0.000237718	CCDC21	chr1:026424535-026424579	-1.15233	0.02	PHOX2A	chr11:071633203-071633256	2.11488	0.006
IFNA8	chr9:021392686-021392738	1.53493	0.000247536	SIX6	chr14:060046812-060046871	-1.15199	0.007	GAB2	chr11:077807056-077807115	-1.11171	0.001
chr4:174659041-174659086	chr4:174659041-174659086	1.54474	0.00132679	C20orf112	chr20:030533780-030533839	-1.15131	0.01	CCDC90B	chr11:082675218-082675266	-1.27055	0.002
PRKCE	chr2:045732957-045733001	1.57554	0.000123192	TPM1	chr15:061128518-061128570	-1.15029	0.008	ACAT1	chr11:107497990-107498049	-1.28834	0.013
FLJ46347	chr2:174899050-174899094	1.60391	0.00504861	L3MBTL	chr20:041569095-041569147	-1.14963	0.016	LAYN	chr11:110916739-110916783	-1.15867	0.037
LYPD3	chr19:048671277-048671321	1.64928	0.00161707	chr11:093034659-093034703	chr11:093034659-093034703	-1.14937	0.003	C11orf57	chr11:111450212-111450256	-1.23836	0.032
OLIG3	chr6:137859963-137860009	1.68102	0.000322184	ANKRD27	chr19:037857258-037857313	-1.14629	0.021	FKBP4	chr12:002773539-002773590	-1.04464	0.026
TRIB2	chr2:012775885-012775934	1.77763	0.000150209	APEX1	chr14:019993378-019993427	-1.14543	0.02	FAM80B	chr12:008741405-008741449	-1.0203	0.016
COL9A2	chr1:040554281-040554336	1.78246	7.85204e-05	HLXB9	chr7:156504283-156504342	-1.14438	0.025	CDKN1B	chr12:012767812-012767871	-1.10424	0.021
WT1	chr11:032411345-032411400	1.99307	0.00337908	VAV2	chr9:135823933-135823992	-1.14364	0.017	chr12:013608220-013608264	chr12:013608220-013608264	1.00618	0.015
chr4:174658948-174658998	chr4:174658948-174658998	2.068	0.00146416	INSR	chr19:007218265-007218324	-1.1427	0.002	WBP11	chr12:014847290-014847341	-1.2706	0.031
				chr22:016911555-016911614	chr22:016911555-016911614	-1.14268	0.017	DHH	chr12:047771493-047771540	2.21118	0.006
				ELOVL6	chr4:111338583-111338642	-1.14204	0.025	ATF1	chr12:049444957-049445001	1.10117	0.001
				STIL	chr1:047552792-047552845	-1.14001	0.014	LETMD1	chr12:049727796-049727855	-1.16063	0.007
				SH3RF2	chr5:145296289-145296343	-1.13944	0.002	chr12:050527758-050527802	chr12:050527758-050527802	-1.07092	0.014
				PCM1	chr8:017825595-017825646	-1.13862	0.026	HOXC11	chr12:052653010-052653069	1.48745	0.039
				HNRPUL1	chr19:046461786-046461845	-1.1383	0.002	RPS26	chr12:054722444-054722496	-1.01374	0.038
				IFT140-CRAMP1L	chr16:001600005-001600055	-1.13652	0.025	chr12:058275866-058275919	chr12:058275866-058275919	-1.24328	0.003
				WDR86	chr7:150737085-150737144	-1.13185	0.037	NUP107	chr12:067367310-067367363	-1.00432	0.022
				ELAVL2	chr9:023812687-023812746	-1.13162	0.013	DUSP6	chr12:088269439-088269483	-1.08262	0.002
				MRPL36-NDUFS6	chr5:001853187-001853246	-1.12854	0.027	PPP1CC	chr12:109664846-109664896	-1.31015	0.003
				HSPC148	chr11:094345873-094345932	-1.12808	0.005	LHX5	chr12:112387007-112387055	-1.23223	0.009
				ERRFI1	chr1:008008042-008008097	-1.12773	0.05	TBX5	chr12:113318513-113318557	-1.08827	0.02
				BVES	chr6:105691905-105691960	-1.12717	0.009	TBX3	chr12:113589176-113589226	1.58205	0.01
				ICA1L	chr2:203444896-203444955	-1.1256	0.003	EP400	chr12:131000372-131000416	-1.41373	0.008
				RQCD1	chr2:219142005-219142051	-1.12558	0.008	chr12:131466722-131466777	chr12:131466722-131466777	-1.0578	0.017
				CRTAP	chr3:033130224-033130283	-1.12535	0.004	chr12:131577734-131577786	chr12:131577734-131577786	-1.0699	0.033
				MOS	chr8:057192635-057192694	-1.12527	0.02	GJB2	chr13:019664252-019664298	-1.02858	0.033
				RNF111	chr15:057066931-057066990	-1.12414	0.025	SACS	chr13:022847835-022847879	-1.11892	0.01
				IFT88	chr13:020039719-020039764	-1.12348	0.044	chr13:022938884-022938928	chr13:022938884-022938928	-1.15018	0.021
				C4orf16	chr4:113371896-113371955	-1.12161	0.026	LNX2-POLR1D	chr13:027093500-027093548	-1.2642	0.04
				TLE3	chr15:068177823-068177882	-1.12012	0.025	chr13:049553824-049553871	chr13:049553824-049553871	-1.1163	0.005
				OTP	chr5:076960291-076960350	-1.1195	0.049	chr13:049602803-049602850	chr13:049602803-049602850	-1.13761	0.03
				RNF149	chr2:101290764-101290819	-1.1186	0.01	DLEU7	chr13:050316204-050316255	-1.15375	0.005
				CLTB	chr5:175775624-175775668	-1.11792	0.004	DHRS12	chr13:051276566-051276618	-1.12103	0.021
				chr12:065750017-065750066	chr12:065750017-065750066	-1.11692	0.032	ATP7B	chr13:051483228-051483277	-1.09799	0.011
				TEKT3	chr17:015185321-015185375	-1.11532	0.025	SPRY2	chr13:079813055-079813101	-1.12519	0.032
				SEC11C	chr18:054957488-054957547	-1.1144	0.001	SLITRK5	chr13:087127298-087127346	1.28879	0.025
				CENPF	chr1:212849171-212849228	-1.11359	0.015	SOX21	chr13:094152658-094152706	2.08849	0.02
				COIL	chr17:052393573-052393632	-1.1133	0.03	DOCK9	chr13:098537596-098537640	-1.28522	0.007
				MCF2L	chr13:112711590-112711649	-1.11306	0.015	ZIC2	chr13:099439464-099439508	1.0429	0.044
				chr1:243383293-243383337	chr1:243383293-243383337	-1.11261	0.04	FGF14	chr13:101366957-101367001	-1.31433	0.001
				NAT10	chr11:034083388-034083440	-1.11217	0.031	IRS2	chr13:109237763-109237809	-1.05626	0.014
				ISL2	chr15:074419303-074419347	-1.11145	0.036	COL4A2	chr13:109836398-109836457	1.30527	0.024
				chr18:044756620-044756664	chr18:044756620-044756664	-1.11105	0	ING1	chr13:110163628-110163672	-2.04159	0.018
				PRPSAP1	chr17:071862292-071862351	-1.11086	0.042	chr13:110860707-110860766	chr13:110860707-110860766	-1.16555	0.006
				NEUROG2	chr4:113663842-113663901	-1.11086	0.025	chr13:111675469-111675518	chr13:111675469-111675518	1.09616	0.05
				ATF3	chr1:210847836-210847895	-1.11016	0	SOX1	chr13:111760581-111760625	1.34497	0.021
				KCNIP3	chr2:095375566-095375613	-1.10995	0.008	SOX1	chr13:111776232-111776277	1.03365	0.008
				LYPLAL1	chr1:217413942-217413992	-1.10892	0	APEX1	chr14:019993317-019993367	-1.21104	0.025
				chr20:024847185-024847242	chr20:024847185-024847242	-1.10881	0.012	C14orf119	chr14:022634388-022634440	-1.09763	0.05
				chr4:155632300-155632356	chr4:155632300-155632356	-1.10703	0.007	NPAS3	chr14:032472939-032472996	-1.00713	0.013
				C17orf81	chr17:007096438-007096497	-1.10696	0.034	TITF1	chr14:036060340-036060399	1.50156	0.002
				DGUOK	chr2:074007825-074007874	-1.10663	0.022	TITF1	chr14:036061931-036061982	2.38289	0.039
				FLJ42117	chr3:059010984-059011032	-1.10648	0.005	TITF1	chr14:036063748-036063792	1.34514	0.025
				LMTK2	chr7:097638660-097638719	-1.10641	0.027	FOXA1	chr14:037134427-037134473	-1.08539	0.042
				COPE	chr19:018890816-018890863	-1.10535	0.011	GPR135	chr14:059001848-059001892	-1.03076	0.019
				chr5:001782321-001782380	chr5:001782321-001782380	-1.10443	0.007	SIX6	chr14:060046995-060047041	1.20334	0.035
				LIMK2	chr22:030002374-030002433	-1.10378	0.002	chr14:061349806-061349850	chr14:061349806-061349850	-1.1243	0.004
				EVI5L	chr19:007832853-007832897	-1.10131	0.004	ZFP36L1	chr14:068331097-068331154	-1.04317	0.049
				NOL8	chr9:094127829-094127877	-1.10103	0.001	SFRS5	chr14:069303731-069303775	-1.06298	0.045
				PTPRK	chr6:128882593-128882642	-1.09861	0.003	ABCD4	chr14:073839012-073839071	-1.08264	0.029
				CTTNBP2	chr7:117301131-117301186	-1.09858	0.02	SEL1L	chr14:081069495-081069539	1.00082	0.009
				chr17:054091705-054091764	chr17:054091705-054091764	-1.09839	0	GSC	chr14:094309137-094309181	1.2231	0.007
				C21orf29	chr21:044953785-044953832	-1.09826	0.006	chr14:100362092-100362143	chr14:100362092-100362143	1.03257	0.006
				FAM19A5	chr22:047533270-047533329	-1.09736	0.038	chr14:100901262-100901308	chr14:100901262-100901308	1.49544	0.044
				ATG3	chr3:113762772-113762816	-1.09717	0.004	chr14:101298630-101298681	chr14:101298630-101298681	-1.16701	0.01
				ZFP37	chr9:114859180-114859239	-1.0962	0.027	DYNC1H1	chr14:101500675-101500719	-1.13924	0.007
				CRH	chr8:067252571-067252628	-1.09398	0.036	chr15:019347688-019347732	chr15:019347688-019347732	-1.07759	0.01
				chr6:006003664-006003723	chr6:006003664-006003723	-1.09362	0.013	SNRPN	chr15:022644567-022644611	-1.10926	0
				BTRC	chr10:103103694-103103740	-1.09315	0.004	DUOXA2	chr15:043196361-043196405	1.23234	0.049
				C6orf151	chr6:007535304-007535357	-1.09277	0.05	chr15:043783934-043783982	chr15:043783934-043783982	1.1331	0.048
				CDX2	chr13:027438289-027438348	-1.09199	0.01	RASL12	chr15:063156078-063156131	-1.09899	0.043
				chr3:018461012-018461067	chr3:018461012-018461067	-1.09199	0.006	IQCH	chr15:065334231-065334275	1.15711	0.022
				NUMA1-LRRC51	chr11:071469204-071469248	-1.09193	0.01	chr15:068664348-068664402	chr15:068664348-068664402	-1.14129	0.037
				XPNPEP1	chr10:111672692-111672751	-1.09088	0.042	ARIH1	chr15:070554356-070554400	-1.13264	0.008
				chr19:047136639-047136683	chr19:047136639-047136683	-1.09082	0.018	ISLR2	chr15:072214502-072214548	1.50511	0.006
				CDKN1B	chr12:012767812-012767871	-1.09017	0.001	ISL2	chr15:074421437-074421488	2.04875	0.009
				BLM	chr15:089061329-089061385	-1.09003	0.006	chr15:076911038-076911082	chr15:076911038-076911082	-1.24586	0.001
				RPS5	chr19:063584322-063584368	-1.08936	0.002	RASGRF1	chr15:077169713-077169757	-1.16553	0.004
				chr15:093188938-093188994	chr15:093188938-093188994	-1.08923	0.027	WDR73	chr15:082978340-082978384	-1.65459	0.002
				ARX	chrX:024931544-024931591	-1.0884	0.004	chr15:087750456-087750500	chr15:087750456-087750500	1.66306	0.011
				NFIL3	chr9:093223834-093223892	-1.08825	0.009	chr15:087753299-087753357	chr15:087753299-087753357	1.67669	0.044
				PRDM16	chr1:003172581-003172638	-1.08807	0.019	NR2F2	chr15:094666659-094666718	-1.10112	0.012
				CCDC41	chr12:093377670-093377714	-1.08683	0.037	NTN2L	chr16:002457715-002457759	-1.14677	0.013
				ANP32E	chr1:148473526-148473581	-1.08625	0.015	ZNF174	chr16:003391704-003391763	-1.05948	0.028
				NKIRAS2	chr17:037422624-037422668	-1.086	0.006	chr16:010387182-010387226	chr16:010387182-010387226	1.12482	0.034
				chr15:097420362-097420415	chr15:097420362-097420415	-1.08464	0.002	DEXI-KIAA0350	chr16:010945881-010945925	-1.42288	0.04
				SETD6	chr16:057106753-057106803	-1.08416	0.042	COG7	chr16:023372022-023372066	-1.19099	0.013
				ID2	chr2:008740179-008740238	-1.08255	0.005	chr16:030793579-030793626	chr16:030793579-030793626	-1.30541	0.005
				UBE2W	chr8:074953966-074954019	-1.08102	0.015	ZNF423	chr16:048230099-048230143	1.07602	0.013
				TSLP	chr5:110436577-110436621	-1.08058	0.02	IRX3	chr16:052878044-052878103	-1.19027	0.014
				TTC26	chr7:138469133-138469184	-1.08034	0.017	IRX6	chr16:053922430-053922486	1.82171	0.03
				ZIC5	chr13:099406237-099406286	-1.08013	0.035	NUDT21-OGFOD1	chr16:055042869-055042915	-1.18401	0.003
				LHX2	chr9:125820314-125820373	-1.0801	0.004	TEPP	chr16:056577078-056577137	2.63432	0.002
				JMJD2B	chr19:005025477-005025533	-1.07997	0.006	ZNF319	chr16:056588771-056588815	-1.16239	0.011
				ERG	chr21:038955590-038955646	-1.07985	0.005	CBFB	chr16:065620830-065620877	-1.10201	0.023
				MAFB	chr20:038753064-038753123	-1.07885	0.033	ATP2C2	chr16:082959717-082959761	-1.21801	0.029
				HPGD	chr4:175680459-175680518	-1.07878	0.022	KIAA0182	chr16:084204012-084204057	-1.19474	0.05
				ARFGAP3	chr22:041582533-041582585	-1.07809	0.024	chr16:085086514-085086568	chr16:085086514-085086568	1.87912	0.027
				TAX1BP1	chr7:027747181-027747240	-1.07754	0.001	chr16:086722181-086722240	chr16:086722181-086722240	-1.01807	0.035
				WNT5A	chr3:055496466-055496525	-1.07631	0.003	MGC16385	chr16:088566969-088567013	-1.38986	0.005
				LOC339524	chr1:087371142-087371196	-1.07583	0.047	BCL6B	chr17:006868198-006868242	-1.28255	0.027
				ACAA1	chr3:038153118-038153162	-1.07533	0.014	TP53-WDR79	chr17:007532287-007532331	-1.02248	0.03
				chr5:092981977-092982036	chr5:092981977-092982036	-1.07488	0.049	CYB5D1	chr17:007702107-007702157	-1.01068	0.05
				MIER3	chr5:056282617-056282663	-1.07455	0	HS3ST3B1	chr17:014146293-014146337	-1.03067	0.013
				chr15:022569617-022569676	chr15:022569617-022569676	-1.07447	0.019	HS3ST3B1	chr17:014152993-014153050	-1.21531	0.03
				TMEM69	chr1:045924746-045924790	-1.07409	0.024	NOS2A	chr17:023144576-023144629	-1.02646	0.01
				UBXD8	chr5:175807731-175807780	-1.0737	0.009	LHX1	chr17:032371363-032371409	1.43539	0.018
				chr6:072351021-072351080	chr6:072351021-072351080	-1.0724	0.003	THRAP4	chr17:035464317-035464363	-1.28061	0.049
				chr11:007997143-007997188	chr11:007997143-007997188	-1.0719	0.011	KRT27	chr17:036189253-036189312	1.08484	0.03
				POLR1A	chr2:086186617-086186676	-1.07133	0	ITGA2B	chr17:039818427-039818475	-1.1785	0.029
				FNBP1	chr9:131843998-131844053	-1.07121	0.023	hsa-mir-196a-1	chr17:044074457-044074501	1.34969	0.031
				chrX:064544802-064544856	chrX:064544802-064544856	-1.07097	0.025	chr17:050671114-050671158	chr17:050671114-050671158	-1.26116	0.038
				CEP350	chr1:178190245-178190289	-1.07092	0.034	BZRAP1	chr17:053757243-053757287	-1.19988	0.02
				WDR27	chr6:169804442-169804501	-1.06886	0.01	BCAS3	chr17:056109350-056109407	-1.0276	0.045
				SEMA6B	chr19:004494289-004494348	-1.06848	0.017	SOX9	chr17:067624907-067624951	1.27547	0.025
				TUBGCP3	chr13:112289675-112289731	-1.06676	0.01	KIAA0195	chr17:070964068-070964114	-1.01599	0.017
				FEZF2	chr3:062330279-062330338	-1.06641	0.006	ACA47	chr17:072596252-072596307	1.02084	0.037
				chr6:028565949-028566008	chr6:028565949-028566008	-1.06573	0.033	chr17:072763799-072763843	chr17:072763799-072763843	1.2362	0.032
				ANK1	chr8:041773930-041773989	-1.0656	0.006	CBX8	chr17:075388835-075388890	-1.39359	0.001
				HBII-108	chr3:052695301-052695345	-1.06558	0.022	chr17:076930712-076930771	chr17:076930712-076930771	-1.49718	0.014
				EIF3S7	chr22:035254773-035254825	-1.06498	0.006	SLC16A3	chr17:077796298-077796342	1.03035	0.022
				PCDHGA8	chr5:140752907-140752966	-1.06481	0.014	chr18:000102529-000102584	chr18:000102529-000102584	-1.19618	0.017
				ISY1	chr3:130363192-130363243	-1.06443	0.002	TTMA	chr18:005880232-005880285	-1.3892	0.028
				AGPAT3	chr21:044227006-044227065	-1.0633	0.024	VAPA	chr18:009905077-009905121	-1.09616	0.038
				POU3F2	chr6:099385972-099386029	-1.0632	0.003	GNAL	chr18:011679098-011679147	1.11575	0.021
				chr10:133494858-133494917	chr10:133494858-133494917	-1.06302	0.026	C18orf1	chr18:013207022-013207069	-1.12654	0.016
				FOXE1	chr9:099660024-099660075	-1.06281	0.013	KIAA1772	chr18:017077390-017077449	-1.03778	0.015
				chr14:033599236-033599280	chr14:033599236-033599280	-1.0628	0.03	ANKRD29	chr18:019453813-019453872	1.04674	0.038
				ZNF295	chr21:042302125-042302184	-1.06272	0.017	NARS	chr18:053448687-053448740	-1.26863	0.02
				chr4:139701128-139701186	chr4:139701128-139701186	-1.06192	0.025	BCL2	chr18:059138407-059138456	-1.16854	0.003
				chr17:023578462-023578506	chr17:023578462-023578506	-1.06116	0.008	C18orf51	chr18:070274511-070274562	-1.3567	0.005
				FOXK1	chr7:004769186-004769245	-1.06111	0.031	chr18:071296334-071296393	chr18:071296334-071296393	-1.05301	0.009
				chr7:151793041-151793094	chr7:151793041-151793094	-1.06102	0.014	NFATC1	chr18:075256228-075256277	-1.04207	0.016
				PRDM12	chr9:132530595-132530654	-1.06098	0.011	NFATC1	chr18:075354615-075354659	-1.23194	0.005
				KRTAP5-6	chr11:001672514-001672567	-1.06073	0.023	POLR2E-GPX4	chr19:001046511-001046555	1.29052	0.01
				HNRPLL	chr2:038682564-038682620	-1.06057	0.031	DAZAP1	chr19:001379700-001379759	-1.22178	0.03
				TF	chr3:134985159-134985218	-1.05994	0.01	UQCR	chr19:001556065-001556109	-1.07636	0.034
				WNT11	chr11:075599912-075599960	-1.05958	0.028	SGTA	chr19:002725292-002725336	-1.00595	0.014
				chr6:138524336-138524386	chr6:138524336-138524386	-1.05954	0.003	ICAM1	chr19:010242667-010242711	-1.08242	0.015
				PAPOLB	chr7:004868338-004868397	-1.05899	0.021	FLJ12949	chr19:010537613-010537657	-1.30261	0.016
				ZIC4	chr3:148599163-148599222	-1.05813	0.021	NR2F6	chr19:017218528-017218580	-1.57068	0.002
				PRDM13	chr6:100173025-100173084	-1.05801	0.024	PLVAP	chr19:017348985-017349032	1.37207	0.014
				LAMA2	chr6:129293056-129293115	-1.0575	0.002	POP4	chr19:034788895-034788939	-1.80602	0.001
				SLC35B4	chr7:133652219-133652263	-1.05735	0.005	chr19:036539737-036539795	chr19:036539737-036539795	-1.17274	0.021
				PHLDA2	chr11:002906346-002906390	-1.05727	0.007	CEBPA	chr19:038486065-038486109	-1.10262	0.029
				chr4:189440643-189440702	chr4:189440643-189440702	-1.0572	0.015	KCTD15	chr19:038980539-038980598	-1.10318	0.016
				chr7:004314135-004314194	chr7:004314135-004314194	-1.05653	0.032	ZNF30	chr19:040110091-040110150	-1.14613	0.01
				PAX8	chr2:113749889-113749943	-1.05612	0.019	LOC644096	chr19:041176685-041176729	1.06157	0.017
				RHPN1	chr8:144522281-144522325	-1.05605	0.008	ZNF790	chr19:041958885-041958944	1.81403	0.033
				SERP1	chr3:151746248-151746299	-1.05573	0.003	SIPA1L3	chr19:043265082-043265126	-1.01491	0.038
				DCPS	chr11:125678665-125678724	-1.055	0.006	FOSB	chr19:050662756-050662801	-1.12568	0.047
				MAPKBP1	chr15:039853712-039853770	-1.05346	0.022	NPAS1	chr19:052216378-052216423	-1.04944	0.014
				POU3F2	chr6:099389408-099389452	-1.05308	0.026	MEIS3	chr19:052614590-052614635	-1.09589	0.018
				SLITRK5	chr13:087124600-087124647	-1.05279	0.021	ZNF331	chr19:058716039-058716083	-1.11596	0.042
				EMX2	chr10:119286375-119286420	-1.05198	0.009	U2AF2	chr19:060858961-060859017	-1.02983	0.019
				chr17:043210444-043210499	chr17:043210444-043210499	-1.05146	0.02	U2AF2	chr19:060877835-060877894	-1.2153	0.027
				NFIX	chr19:012985216-012985271	-1.05062	0.013	EPN1	chr19:060907107-060907151	1.20457	0.003
				TTLL10	chr1:001099631-001099690	-1.0497	0.046	ZSCAN5	chr19:061420733-061420777	1.18826	0.02
				EBF3	chr10:131660315-131660374	-1.04856	0.003	chr19:062911842-062911890	chr19:062911842-062911890	2.36321	0.004
				TAP1-PSMB9	chr6:032929798-032929842	-1.04676	0.007	ZNF544	chr19:063431989-063432033	-1.06138	0.044
				chr15:021674220-021674266	chr15:021674220-021674266	-1.04673	0.032	TPO	chr2:001523176-001523235	1.31093	0.027
				hsa-mir-124a-1	chr8:009794222-009794269	-1.04615	0.004	MYT1L	chr2:001780588-001780632	-1.18076	0.043
				ARHGAP21	chr10:025053405-025053460	-1.04588	0.027	ODC1	chr2:010505219-010505276	1.07884	0.035
				chr20:059032711-059032766	chr20:059032711-059032766	-1.0457	0.002	KCNF1	chr2:010970262-010970306	-1.26405	0.01
				PRKAG2	chr7:151204926-151204978	-1.04415	0	LPIN1	chr2:011803944-011803995	-1.22003	0.017
				LHB	chr19:054213611-054213656	-1.04299	0.042	SF3B14	chr2:024152723-024152767	-1.02034	0.043
				DSCR1L2	chr1:024734522-024734581	-1.04294	0.05	DPYSL5	chr2:026923897-026923943	-1.09404	0.05
				IARS	chr9:094096131-094096190	-1.04275	0.004	PRO1853	chr2:037312707-037312766	-1.2698	0.009
				KHSRP	chr19:006365673-006365732	-1.04141	0.023	PPM1B	chr2:044248903-044248949	-1.03271	0.037
				chr1:050663080-050663139	chr1:050663080-050663139	-1.04056	0.004	PRKCE	chr2:045732845-045732889	1.42674	0.035
				EBF1	chr5:158466399-158466458	-1.04037	0	EPAS1	chr2:046380242-046380291	2.15065	0.042
				chr9:123928975-123929034	chr9:123928975-123929034	-1.04002	0.016	BCL11A	chr2:060635682-060635736	-1.40102	0.023
				C1orf61	chr1:154672280-154672339	-1.0386	0.017	SPRED2-FLJ16124	chr2:065516314-065516372	-1.05909	0.049
				ZNF471	chr19:061710498-061710555	-1.03785	0.012	ANTXR1	chr2:069093779-069093827	-1.0852	0.021
				HS3ST3B1	chr17:014145015-014145059	-1.03765	0.035	MXD1	chr2:070029723-070029782	1.15063	0.047
				EGR2	chr10:064247515-064247574	-1.03697	0.003	MPHOSPH10	chr2:071211194-071211238	-1.08098	0.048
				chr15:032663123-032663167	chr15:032663123-032663167	-1.03693	0.005	EMX1	chr2:073001563-073001607	1.24472	0.021
				C14orf112	chr14:069896129-069896181	-1.0368	0.005	LBX2	chr2:074584334-074584378	1.00456	0.042
				TEX14-RAD51C	chr17:054124769-054124824	-1.03629	0.007	MAT2A	chr2:085619947-085619991	-1.05926	0.031
				TMEM145	chr19:047522106-047522157	-1.03488	0.001	chr2:088846602-088846646	chr2:088846602-088846646	-1.14239	0.029
				JAK2	chr9:005033280-005033339	-1.0348	0.012	KIAA1754L	chr2:096351653-096351712	-1.04516	0.05
				CAMSAP1	chr9:137850906-137850965	-1.03474	0.03	SEMA4C	chr2:096894539-096894584	1.0532	0.003
				GRIN1	chr9:139162385-139162444	-1.03443	0.018	TXNDC9-EIF5B	chr2:099319943-099320002	-1.09949	0.002
				MAP2K7	chr19:007874261-007874315	-1.03369	0.031	POU3F3	chr2:104837357-104837403	-2.35797	0.003
				chr7:157172651-157172710	chr7:157172651-157172710	-1.03347	0.034	FLJ44006-BCL2L11	chr2:111592265-111592324	-1.4384	0.04
				KCND2	chr7:119700001-119700060	-1.03279	0.017	FLJ44006-BCL2L11	chr2:111594143-111594202	-1.09362	0.027
				GLTP	chr12:108767797-108767848	-1.03236	0.008	DPP10	chr2:115636812-115636865	1.77761	0.032
				SEMA5A	chr5:009599765-009599812	-1.03228	0.006	chr2:120916109-120916165	chr2:120916109-120916165	-1.05134	0.035
				KLHDC2	chr14:049303885-049303944	-1.02941	0.019	SFT2D3	chr2:128175956-128176000	-1.02921	0.01
				TBCCD1-DNAJB11	chr3:187770947-187770994	-1.02897	0.037	MCM6	chr2:136349784-136349832	-1.0957	0.029
				LBX1	chr10:102972389-102972448	-1.02864	0.008	NXPH2	chr2:139254048-139254097	-1.05143	0.013
				chr12:113366097-113366144	chr12:113366097-113366144	-1.02841	0.026	NR4A2	chr2:156884761-156884805	1.43904	0.02
				chr10:002922128-002922187	chr10:002922128-002922187	-1.0283	0.002	chr2:156964967-156965020	chr2:156964967-156965020	-1.03571	0.015
				PSMA3	chr14:057781711-057781758	-1.02826	0.001	TANK	chr2:161803169-161803217	-1.2009	0.032
				CDC5L	chr6:044463048-044463107	-1.02824	0.035	TBR1	chr2:161981774-161981818	1.63753	0.033
				KCNA2	chr1:110950979-110951023	-1.02731	0.003	SSB	chr2:170363777-170363821	-1.07683	0.033
				SMARCA2	chr9:002037850-002037909	-1.02727	0.007	DLX2	chr2:172667692-172667736	-1.1724	0.013
				ITGB5	chr3:126089225-126089269	-1.02583	0.004	DLX2	chr2:172681255-172681299	1.22087	0.033
				chr8:145882379-145882437	chr8:145882379-145882437	-1.02563	0.031	FLJ46347	chr2:174899050-174899094	2.32814	0.018
				SLFN12	chr17:030758986-030759045	-1.02536	0.047	EVX2	chr2:176656045-176656089	1.43426	0.023
				HOXA3	chr7:027128548-027128605	-1.02532	0.019	HOXD11	chr2:176681940-176681999	-1.32061	0.004
				THYN1	chr11:133628013-133628066	-1.02504	0.002	HOXD3	chr2:176735779-176735829	1.36354	0.004
				RNGTT	chr6:089730291-089730344	-1.024	0.029	HOXD3	chr2:176737609-176737653	1.35161	0.017
				GNAS	chr20:056850360-056850410	-1.02335	0.009	SATB2-FLJ32063	chr2:200033921-200033980	-1.39805	0.001
				LRAT	chr4:155881409-155881464	-1.02282	0.031	CFLAR	chr2:201691591-201691644	-1.02431	0.007
				LOC644168	chr10:050276787-050276846	-1.02276	0.002	FLJ20309	chr2:206658011-206658062	-1.04949	0.038
				ONECUT2	chr18:053256047-053256102	-1.02252	0.047	PIP5K3	chr2:208838880-208838939	-1.59092	0.01
				HS3ST3B1	chr17:014147282-014147338	-1.02195	0.015	RPE	chr2:210575330-210575385	-1.29757	0.046
				CD247	chr1:165691030-165691089	-1.02059	0.005	FN1	chr2:216008465-216008512	-1.01285	0.008
				TUBGCP3	chr13:112249702-112249750	-1.0198	0.041	GLB1L	chr2:219816362-219816409	1.09851	0.047
				chr4:190969238-190969297	chr4:190969238-190969297	-1.01959	0.003	FLJ32447	chr2:222870183-222870240	2.12172	0.033
				NEUROG2	chr4:113656052-113656098	-1.01954	0.01	chr2:222891691-222891735	chr2:222891691-222891735	-1.31162	0.008
				HES4	chr1:000924178-000924237	-1.01809	0.031	PTMA	chr2:232280019-232280064	-1.0854	0.032
				NR2F2	chr15:094678727-094678775	-1.01675	0	GBX2	chr2:236739045-236739104	-1.3499	0.031
				FRMD1	chr6:168216233-168216292	-1.01566	0.01	chr20:001732612-001732658	chr20:001732612-001732658	-1.20083	0.043
				C5orf4-CNOT8	chr5:154217541-154217585	-1.01552	0.038	CDC25B	chr20:003724542-003724586	-1.27665	0.013
				chr19:014045133-014045177	chr19:014045133-014045177	-1.01506	0.006	C20orf103	chr20:009435205-009435249	1.80017	0.016
				DND1	chr5:140032932-140032977	-1.01483	0.014	C20orf103	chr20:009444734-009444784	1.32933	0.03
				RBM35A	chr8:095720997-095721041	-1.01467	0.007	BFSP1	chr20:017460216-017460267	-1.02605	0.041
				CDCA7	chr2:173928473-173928517	-1.01465	0.021	INSM1	chr20:020294682-020294741	-1.1452	0.024
				SPTAN1	chr9:130353968-130354027	-1.01425	0.002	NKX2-2	chr20:021436189-021436236	1.19792	0.034
				AGTR1	chr3:149898064-149898123	-1.01422	0.003	NKX2-2	chr20:021437474-021437518	1.91654	0.034
				GFM2	chr5:074098242-074098301	-1.01415	0.025	FOXA2	chr20:022511941-022511985	-1.07201	0.047
				chr19:034713135-034713179	chr19:034713135-034713179	-1.01345	0	chr20:037112536-037112592	chr20:037112536-037112592	-1.08082	0.01
				INPP5A	chr10:134447367-134447416	-1.01314	0.011	CBLN4	chr20:054012708-054012752	-1.13731	0.029
				USP52-IL23A	chr12:055014170-055014214	-1.01128	0.001	HRH3	chr20:060227514-060227558	1.34849	0.044
				JUN	chr1:059023268-059023312	-1.01125	0.046	chr20:060984205-060984264	chr20:060984205-060984264	-1.09008	0.028
				PPP2CA	chr5:133590447-133590495	-1.01071	0.001	chr20:061932055-061932099	chr20:061932055-061932099	-1.17907	0.015
				KIAA0738	chr7:143213572-143213631	-1.01007	0.043	ADAMTS5	chr21:027260838-027260897	1.32054	0.03
				chr10:118537556-118537613	chr10:118537556-118537613	-1.00993	0.029	OLIG2	chr21:033328025-033328071	1.86252	0.005
				YWHAQ	chr2:009687529-009687580	-1.00954	0.037	PRDM15	chr21:042094944-042094998	1.4588	0.034
				MALT1	chr18:054489075-054489134	-1.00912	0.03	chr21:044968071-044968116	chr21:044968071-044968116	1.61733	0.049
				SLC16A14	chr2:230640631-230640690	-1.00897	0.045	COL6A1	chr21:046225512-046225571	-1.00024	0.007
				CCDC81	chr11:085763683-085763742	-1.00865	0.011	RASL10A	chr22:028039881-028039925	1.04475	0.003
				IGSF11	chr3:120235710-120235769	-1.00678	0.014	U43	chr22:038045570-038045614	-1.60548	0
				CRBN	chr3:003195991-003196042	-1.00659	0.016	TTLL1	chr22:041814939-041814998	-1.14544	0.011
				C18orf4	chr18:063334154-063334208	-1.00578	0.008	TSPO	chr22:041877984-041878031	-1.12394	0.029
				DLX1	chr2:172656355-172656408	-1.00559	0.044	PHF21B	chr22:043783070-043783114	-1.14563	0.033
				SUPT7L	chr2:027740004-027740063	-1.00544	0	LRRN1	chr3:003815800-003815850	-1.01876	0.026
				chr15:024635013-024635059	chr15:024635013-024635059	-1.00483	0.016	MKRN2	chr3:012574054-012574113	-1.40494	0.01
				RAP1GDS1	chr4:099402226-099402281	-1.00433	0.022	chr3:013220838-013220882	chr3:013220838-013220882	1.10311	0.041
				PRR15	chr7:029570718-029570773	-1.00401	0.006	WNT7A	chr3:013871045-013871089	1.12174	0.008
				RAB12	chr18:008598713-008598768	-1.00336	0.035	C3orf19	chr3:014668206-014668250	-1.03174	0.035
				SMAD7	chr18:044731574-044731633	-1.00312	0.023	chr3:018461257-018461308	chr3:018461257-018461308	-1.26529	0.017
				PRDM15	chr21:042109585-042109644	-1.00292	0.038	STT3B	chr3:031548600-031548644	-1.04568	0.002
				HNRPC	chr14:020807605-020807664	-1.00286	0.024	ZNF501	chr3:044745859-044745903	1.23288	0.019
				F7	chr13:112799568-112799623	-1.00254	0.018	UQCRC1	chr3:048622304-048622348	-1.18761	0.021
				chr12:063461486-063461545	chr12:063461486-063461545	-1.00199	0.036	IHPK1	chr3:049798515-049798559	-1.0657	0.008
				chr4:057105500-057105559	chr4:057105500-057105559	-1.00197	0.033	CISH-MAPKAPK3	chr3:050624400-050624454	-1.04705	0.016
				STK35	chr20:002031082-002031129	-1.00141	0.003	RBM15B	chr3:051404266-051404310	-1.0059	0.007
				NR4A2	chr2:156906204-156906263	-1.00096	0.019	CACNA1D	chr3:053505074-053505118	-1.47943	0.045
				DNAJB2	chr2:219852782-219852826	-1.00087	0	chr3:054097207-054097255	chr3:054097207-054097255	-1.25128	0.002
				USP44	chr12:094467105-094467164	-1.00065	0.005	FEZF2	chr3:062331048-062331102	1.47108	0.018
				CYP2E1	chr10:135192220-135192279	-1.00018	0.044	chr3:065317846-065317890	chr3:065317846-065317890	-1.33655	0.041
				ZCCHC10	chr5:132389877-132389921	-1.00014	0.002	RPL24	chr3:102887974-102888018	-1.38125	0.005
				FOXF1	chr16:085100418-085100472	-1.00001	0.029	WDR5B	chr3:123617314-123617369	-1.59774	0.032
				TELO2	chr16:001490627-001490671	1.0022	0.022	FOXL2	chr3:140140361-140140418	1.69191	0.007
				IRAK2	chr3:010251209-010251253	1.01673	0.044	SERP1-EIF2A	chr3:151747178-151747222	-1.18819	0.03
				chr8:026361690-026361734	chr8:026361690-026361734	1.01737	0.027	RAP2B	chr3:154361577-154361636	-1.11953	0.013
				NFATC1	chr18:075372145-075372193	1.02202	0.028	SGEF	chr3:155322392-155322443	-1.17029	0.028
				TOLLIP	chr11:001287594-001287638	1.0233	0.004	GOLPH4	chr3:169295655-169295699	-1.03674	0.017
				chr10:000675108-000675152	chr10:000675108-000675152	1.04131	0.048	B3GNT5	chr3:184454133-184454177	-1.17552	0.023
				PIP5K1C	chr19:003604453-003604497	1.04618	0.022	FGFRL1	chr4:000994643-000994702	-1.37842	0.002
				chr8:103682145-103682192	chr8:103682145-103682192	1.05713	0.013	chr4:001034394-001034451	chr4:001034394-001034451	1.0119	0.036
				INSIG1	chr7:154719564-154719614	1.05886	0.015	chr4:001397584-001397628	chr4:001397584-001397628	1.00958	0.013
				TMEM70	chr8:075051485-075051544	1.05952	0.008	RGS12	chr4:003288713-003288760	-1.13958	0.033
				PCNT	chr21:046657205-046657249	1.06456	0.016	MSX1	chr4:004910620-004910670	1.64512	0.02
				PPP2R3B	chrY:000233559-000233606	1.11471	0.042	TBC1D14	chr4:007040210-007040260	-1.01236	0.008
				NDUFS7	chr19:001342226-001342276	1.14101	0.025	RAB28	chr4:013095615-013095659	-1.05611	0.025
				NOLC1	chr10:103902106-103902150	1.17444	0.007	RBPSUH	chr4:025970534-025970593	-1.06161	0.024
				chr8:001100926-001100973	chr8:001100926-001100973	1.23135	0.022	SCC-112	chr4:039655901-039655945	1.16959	0.015
				C16orf30	chr16:001538943-001538987	1.29126	0.05	FLJ20273	chr4:040134541-040134585	-1.40424	0.038
				WFS1	chr4:006354364-006354408	1.48627	0.004	chr4:041570155-041570205	chr4:041570155-041570205	2.47483	0.011
				GPR161	chr1:166371865-166371912	1.49352	0.022	SPATA18	chr4:052637928-052637972	1.48335	0.012
								SHROOM3	chr4:077726002-077726061	-1.1893	0.048
								chr4:077942083-077942127	chr4:077942083-077942127	1.11721	0.004
								PITX2	chr4:111780048-111780092	1.07772	0.011
								MAML3	chr4:141293278-141293329	-1.03286	0.007
								LOC441046	chr4:144699919-144699978	-1.10796	0.003
								LSM6	chr4:147316719-147316763	-1.18199	0.021
								DCHS2	chr4:155473502-155473553	1.95873	0.006
								chr4:174658646-174658690	chr4:174658646-174658690	1.04269	0.007
								HELT	chr4:186174143-186174187	1.11054	0.04
								PDLIM3	chr4:186693128-186693187	-1.09214	0.028
								chr5:000145226-000145270	chr5:000145226-000145270	-1.03505	0.014
								chr5:002696343-002696402	chr5:002696343-002696402	1.42938	0
								CEI	chr5:002807554-002807613	-1.02466	0.036
								IRX1	chr5:003650235-003650294	-1.20181	0.041
								IRX1	chr5:003654419-003654473	1.21416	0.026
								CTNND2	chr5:011438552-011438598	-1.20181	0.026
								GDNF	chr5:037873885-037873944	-1.00736	0.05
								ITGA2	chr5:052321199-052321243	-1.06351	0.039
								UNG2	chr5:054565873-054565917	-1.18648	0.036
								LOC375449	chr5:065929234-065929282	-1.09299	0.012
								TNPO1	chr5:072179552-072179611	-1.05607	0.012
								chr5:072712503-072712553	chr5:072712503-072712553	1.27984	0.045
								ANKRA2	chr5:072897005-072897052	-1.39603	0.024
								FLJ35779	chr5:075048985-075049032	-1.23987	0.048
								CETN3	chr5:089741416-089741475	-1.03837	0.027
								ARRDC3	chr5:090712378-090712425	-1.098	0.011
								ZH2C2	chr5:102483514-102483561	-1.36886	0.002
								AFF4	chr5:132326605-132326664	-1.21256	0.005
								CXCL14	chr5:134942641-134942694	1.31611	0.034
								chr5:139106118-139106169	chr5:139106118-139106169	1.29457	0.002
								chr5:139119433-139119492	chr5:139119433-139119492	-1.39462	0.033
								PCDHGA3	chr5:140703684-140703740	2.62591	0.003
								PCDHGA4	chr5:140714828-140714872	1.36178	0.012
								PCDHGB4	chr5:140747497-140747552	1.99441	0.046
								PCDHGB5	chr5:140759171-140759222	2.2332	0.023
								PCDHGA10	chr5:140774444-140774493	1.3028	0.012
								PCDHGA11	chr5:140780845-140780904	2.442	0.003
								PCDHGA11	chr5:140783016-140783060	1.14233	0.017
								PCDHGA12	chr5:140790881-140790940	1.2963	0.029
								PCDHGC3	chr5:140837988-140838047	1.8495	0.036
								EBF1	chr5:158464953-158465003	1.05796	0.008
								TLX3	chr5:170668797-170668844	-1.40656	0.001
								NKX2-5	chr5:172593751-172593810	1.42819	0.019
								chr5:172605589-172605640	chr5:172605589-172605640	2.17898	0.001
								BTNL9	chr5:180412125-180412184	-1.10547	0.011
								TRIM41	chr5:180576819-180576866	-1.01583	0.006
								chr6:001323750-001323796	chr6:001323750-001323796	1.05628	0.02
								FOXC1	chr6:001558057-001558116	-1.20328	0.017
								NRN1	chr6:005948358-005948416	1.51307	0.019
								TFAP2A	chr6:010525832-010525884	1.07475	0.033
								TBC1D7	chr6:013437013-013437057	-1.03696	0.029
								SOX4	chr6:021703027-021703072	-1.04422	0.049
								HIST1H2AB	chr6:026141772-026141831	-1.1269	0.003
								HIST1H3G-HIST1H2BI	chr6:026380459-026380505	2.01934	0.001
								chr6:027172564-027172610	chr6:027172564-027172610	1.45229	0.02
								PRSS16	chr6:027336114-027336158	1.63613	0.014
								chr6:027571183-027571227	chr6:027571183-027571227	1.59142	0.038
								ZNF307-C6orf194	chr6:028334899-028334952	1.29354	0.005
								C6orf194	chr6:028335139-028335183	1.44712	0.013
								ZNF96	chr6:028475128-028475172	2.08896	0.021
								GTF2H4	chr6:030989492-030989536	-1.40111	0.005
								BAT2	chr6:031695685-031695744	-1.02113	0.035
								PRRT1	chr6:032224542-032224586	1.83112	0.017
								chr6:041581042-041581099	chr6:041581042-041581099	-1.32221	0
								TMEM63B	chr6:044228349-044228393	1.0206	0.038
								CD2AP	chr6:047553175-047553223	-1.16867	0
								COL9A1	chr6:071049362-071049409	2.52179	0.022
								chr6:072186651-072186695	chr6:072186651-072186695	-1.09702	0.011
								chr6:072351513-072351561	chr6:072351513-072351561	1.07051	0.012
								chr6:072355270-072355314	chr6:072355270-072355314	1.30257	0.037
								chr6:074065521-074065567	chr6:074065521-074065567	1.31968	0.035
								U50B	chr6:086445018-086445077	-1.14196	0.017
								chr6:087921968-087922012	chr6:087921968-087922012	-1.01784	0.018
								C6orf166	chr6:088468474-088468521	-1.01616	0.014
								chr6:088934233-088934281	chr6:088934233-088934281	1.76289	0.047
								SIM1	chr6:101002524-101002573	2.60877	0.005
								SIM1	chr6:101004020-101004064	2.99864	0.009
								SIM1	chr6:101022497-101022556	2.45301	0.036
								GRIK2	chr6:101957066-101957110	1.24562	0.042
								LIN28B	chr6:105507584-105507636	1.81518	0.019
								chr6:106535687-106535746	chr6:106535687-106535746	1.19608	0.013
								C6orf203	chr6:107456389-107456433	-1.01258	0.001
								LACE1	chr6:108722552-108722606	-1.31255	0.006
								SLC22A16	chr6:110904929-110904988	-1.17133	0.005
								TCF21	chr6:134255862-134255920	1.19668	0.003
								MAP7	chr6:136723415-136723460	-1.54867	0.049
								MAP3K5	chr6:137155294-137155338	-1.04423	0.007
								CCDC28A	chr6:139136201-139136246	-1.02165	0.02
								SHPRH	chr6:146327243-146327297	-1.22466	0.024
								chr6:150011537-150011581	chr6:150011537-150011581	-1.01329	0.003
								chr6:166274227-166274286	chr6:166274227-166274286	-1.00819	0.039
								UNCX4.1	chr7:001244225-001244272	1.45437	0.008
								TTYH3	chr7:002664585-002664629	-1.83144	0
								KIAA1856	chr7:005427975-005428031	-1.13684	0.039
								FSCN1	chr7:005614143-005614190	1.19869	0.013
								chr7:006542908-006542967	chr7:006542908-006542967	-1.05351	0.039
								NXPH1	chr7:008449587-008449636	1.70479	0.049
								chr7:012410231-012410288	chr7:012410231-012410288	-1.25294	0.021
								IGF2BP3	chr7:023480481-023480525	-1.04132	0.024
								chr7:025864948-025864992	chr7:025864948-025864992	2.31857	0.004
								hsa-mir-148a	chr7:025956455-025956514	-1.06805	0.038
								SNX10	chr7:026383441-026383496	2.09002	0.034
								HOXA13	chr7:027205208-027205252	-1.13245	0.041
								KIAA0644	chr7:028964975-028965028	-1.36482	0.026
								PRR15	chr7:029570657-029570715	-1.27522	0.02
								POU6F2	chr7:039419986-039420041	-1.1848	0.014
								GLI3	chr7:042234010-042234069	-1.14626	0.033
								chr7:045094689-045094733	chr7:045094689-045094733	1.17065	0.007
								chr7:054923934-054923993	chr7:054923934-054923993	-1.03182	0.035
								AUTS2	chr7:068702714-068702758	-1.09368	0.004
								BAZ1B	chr7:072574587-072574631	-1.1217	0.017
								ZNF804B	chr7:088227283-088227327	-1.12754	0.026
								chr7:089586937-089586981	chr7:089586937-089586981	-1.00455	0.049
								FZD1	chr7:090734171-090734219	1.31909	0.043
								LMTK2	chr7:097638660-097638719	-1.07488	0.026
								ZCWPW1	chr7:099864016-099864071	-1.10765	0.009
								MLL5	chr7:104440968-104441020	-1.21208	0.022
								TES	chr7:115637521-115637576	-1.07934	0.033
								PTPRZ1	chr7:121300794-121300839	-1.122	0.003
								FEZF1	chr7:121727241-121727285	2.068	0.01
								chr7:121744474-121744518	chr7:121744474-121744518	1.57333	0.02
								TSPAN33	chr7:128596642-128596686	-1.1116	0.029
								ZC3HC1	chr7:129478128-129478187	-1.13113	0.005
								chr7:130442577-130442636	chr7:130442577-130442636	-1.22388	0.018
								TRIM24	chr7:137795234-137795291	-1.1514	0.007
								chr7:154858586-154858639	chr7:154858586-154858639	1.85297	0.036
								HLXB9	chr7:156489857-156489901	1.53195	0.016
								HLXB9	chr7:156490556-156490603	1.89473	0.011
								HLXB9	chr7:156497211-156497270	-1.00269	0.031
								chr7:157286916-157286975	chr7:157286916-157286975	-1.28012	0.02
								chr7:157910542-157910596	chr7:157910542-157910596	-1.48175	0.023
								CLN8	chr8:001698575-001698634	-1.0882	0.032
								GATA4	chr8:011604636-011604683	1.05471	0.039
								chr8:020204991-020205038	chr8:020204991-020205038	-1.14114	0.001
								chr8:023619682-023619726	chr8:023619682-023619726	1.00966	0.029
								chr8:023622944-023622991	chr8:023622944-023622991	1.60558	0.03
								EBF2	chr8:025955446-025955495	1.47495	0.026
								DPYSL2	chr8:026491502-026491557	-1.18718	0.006
								ELP3	chr8:028006725-028006770	-1.06655	0.015
								DUSP4	chr8:029264580-029264624	-1.14406	0.015
								DUSP4	chr8:029266332-029266391	-1.32114	0.026
								LSM1	chr8:038153152-038153197	-1.01098	0.018
								HTRA4	chr8:038951433-038951481	-1.17597	0.027
								chr8:068035885-068035931	chr8:068035885-068035931	-1.69613	0.011
								chr8:081653885-081653929	chr8:081653885-081653929	-1.25018	0.007
								WDR21C	chr8:088955452-088955496	1.00651	0.037
								EFCBP1	chr8:091873357-091873401	-1.08758	0.042
								CCNE2	chr8:095977777-095977821	-1.09528	0.008
								TM7SF4	chr8:105411543-105411594	1.16682	0.023
								MYC	chr8:128815682-128815741	-1.18449	0.047
								ANKRD15	chr9:000495767-000495821	-1.52413	0.039
								C9orf150	chr9:012765667-012765722	-1.08472	0.004
								chr9:014337804-014337848	chr9:014337804-014337848	-1.34938	0.028
								chr9:014338970-014339026	chr9:014338970-014339026	-1.92443	0.025
								IFNA8	chr9:021392927-021392971	1.95305	0.033
								CDKN2B	chr9:021998982-021999029	-1.05397	0.007
								C9orf82	chr9:026882194-026882245	-1.30626	0.012
								chr9:029204698-029204743	chr9:029204698-029204743	2.13469	0.034
								RECK	chr9:036027475-036027532	-1.06947	0.029
								APBA1	chr9:071477872-071477916	-1.10056	0.047
								FOXB2	chr9:078818995-078819039	1.05344	0.003
								FOXB2	chr9:078821509-078821553	1.1744	0.032
								ROR2	chr9:093750835-093750885	-1.27565	0.013
								IARS	chr9:094095481-094095540	-1.14199	0.025
								GABBR2	chr9:100510219-100510266	-1.03173	0.026
								NR4A3	chr9:101623240-101623292	-1.09305	0
								NR4A3	chr9:101624792-101624843	-1.16033	0.009
								chr9:122876596-122876650	chr9:122876596-122876650	1.00073	0.028
								LHX2	chr9:125818533-125818592	2.26955	0.032
								HSPA5	chr9:127042748-127042793	-1.4102	0.024
								LMX1B	chr9:128426031-128426075	1.28222	0.034
								chr9:131239471-131239528	chr9:131239471-131239528	-1.00461	0.04
								COL5A1	chr9:136800238-136800282	1.1676	0.011
								NOTCH1	chr9:138559348-138559395	-1.03813	0.017
								TUBB2C	chr9:139255396-139255446	-1.18912	0.045
								PNPLA4	chrX:007855660-007855711	-1.29597	0.035
								chrX:027792154-027792213	chrX:027792154-027792213	1.23713	0.017
								chrX:039913793-039913852	chrX:039913793-039913852	-1.07323	0.012
								RP2	chrX:046581969-046582017	-1.10114	0.031
								CACNA1F	chrX:048974262-048974306	1.50334	0.036
								CDX4	chrX:072583960-072584006	1.19249	0.025
								RPS6KA6	chrX:083329184-083329229	1.24237	0.002
								CSTF2	chrX:099962020-099962064	-1.02678	0.048
								IRS4	chrX:107865248-107865296	-1.12573	0.005
								OTEX	chrX:119133877-119133929	-1.05103	0.011
								chrX:122694762-122694806	chrX:122694762-122694806	-1.09187	0.008
								chrX:123294481-123294531	chrX:123294481-123294531	1.08111	0.006
								hsa-mir-542	chrX:133507869-133507915	1.33929	0.008
								chrX:135962106-135962161	chrX:135962106-135962161	-1.21795	0.013
								chrX:139349125-139349183	chrX:139349125-139349183	-1.10863	0.05
								chrX:149283268-149283326	chrX:149283268-149283326	-1.07078	0.004
								chrY:016077633-016077677	chrY:016077633-016077677	-1.02065	0.033
