# Supplementary material for: Altered DNA Methylation Landscapes of Polycomb-Repressed Loci Are Associated with Prostate Cancer Progression and ERG Oncogene Expression in Prostate Cancer
Source: Oxford University Press journal article supplement (doi:10.1158/1078-0432.ccr-12-3139), 2013-04-02
Supplement: 10780432ccr123139-sup-supplementary_table_5_xlsx_file_337k.xlsx [file 10780432ccr123139-sup-supplementary_table_5_xlsx_file_337k.xlsx]

## Sheet: Sheet1
ERG positive																ERG negative
GS associated hypomethylated DMRs								GS associated hypermethylated DMRs								GS associated hypomethylated DMRs								GS associated hypermethylated DMRs
Annotation Cluster 1	Enrichment Score: 3.8931667382144184							Annotation Cluster 1	Enrichment Score: 23.513545963276716							Annotation Cluster 1	Enrichment Score: 6.9874667959370225							Annotation Cluster 1	Enrichment Score: 9.603510662237957
Category	Term	Count	PValue	Genes	Bonferroni	Benjamini	FDR	Category	Term	Count	PValue	Genes	Bonferroni	Benjamini	FDR	Category	Term	Count	PValue	Genes	Bonferroni	Benjamini	FDR	Category	Term	Count	PValue	Genes	Bonferroni	Benjamini	FDR
GOTERM_MF_FAT	GO:0030528~transcription regulator activity	51	3.63868e-06	FOXA2, POU6F2, RBM4, PAX6, GLI3, CBFB, HOXD11, FUBP1, MLL5, NR2F6, ATOH7, NR2F2, MYC, ELP3, GTF2H4, FOSB, MYT1L, BAZ1B, FOXC1, IRX3, CAMTA1, HOXA13, GLIS1, IRX1, SOX4, PRDM16, ZNF174, ZFP36L1, NPAS1, MEIS3, NPAS3, BCL2, BCL11A, GBX2, LHX5, POU3F3, MAML3, TLX3, APEX1, ING1, NFATC1, FOXD3, CEBPA, TBX5, FOXA1, AFF4, TRIM24, NR4A3, DLX2, NOTCH1, BCL6B	0.00142172	0.00142172	0.00505832	GOTERM_MF_FAT	GO:0003700~transcription factor activity	51	1.85242e-31	SOX21, HELT, EVX2, CDX4, PAX7, GATA4, FOXB2, OLIG2, ALX4, PITX2, PHOX2A, TBX15, GSC, EMX1, BARHL2, MXD1, TBR1, SIX6, PROX1, HOXC11, MSX1, HOXD3, TFAP2A, LBX2, IRX6, SOX1, IRX1, SOX9, WT1, ATF1, TCF21, LHX1, LHX2, FOXD2, NKX2-5, DBX1, SIM1, NKX2-2, NKX2-3, FOXD3, ZNF423, FOXL2, TBX3, LMX1B, EPAS1, NR4A2, LMX1A, DLX2, ISL2, EBF1, NR5A2	2.53781e-29	2.53781e-29	2.17736e-28	GOTERM_MF_FAT	GO:0043565~sequence-specific DNA binding	35	3.6231e-10	CDX2, FOXK1, EVX2, HOXA11, ONECUT2, NFIX, PRDM16, OTP, ARX, ATOH1, HOXA3, FOXF1, LHX2, PAX8, POU3F2, NR2F2, NFIL3, LHX9, NKX2-2, FOXD3, ERG, LBX1, SMAD7, MAFB, TAF7, EMX2, BARHL2, NR4A2, NEUROG2, SIX6, ISL2, DLX1, ATF3, JUN, FOXE1	1.46373e-07	1.46373e-07	5.06084e-07	SP_PIR_KEYWORDS	dna-binding	31	2.9288e-14	CDX4, IRX1, ONECUT2, NFIX, PAX3, PRDM16, WT1, ZIC2, MEIS2, OLIG3, PAX9, HAND2, FOXB2, SOX17, FOXD1, NKX2-2, SIM1, TWIST1, FOXD3, PHOX2B, TBX15, LBX1, BARHL2, NR4A2, SIX2, VAX1, EN2, FEZF2, EBF2, DLX4, SHOX	3.45857e-12	3.45857e-12	3.35398e-11
GOTERM_MF_FAT	GO:0043565~sequence-specific DNA binding	28	5.91582e-06	IRX3, HOXA13, FOXA2, POU6F2, IRX1, PAX6, PRDM16, GLI3, HOXD11, MEIS3, GBX2, NR2F6, LHX5, POU3F3, TLX3, NR2F2, MYC, NFATC1, FOXD3, CEBPA, TBX5, FOXA1, TRIM24, NR4A3, FOSB, DLX2, NOTCH1, FOXC1	0.00231042	0.00115588	0.00822378	GOTERM_MF_FAT	GO:0043565~sequence-specific DNA binding	43	5.44854e-31	IRX6, SOX1, EVX2, CDX4, IRX1, PRDM16, SOX9, ATF1, WT1, TCF21, LHX1, LHX2, PAX7, GATA4, FOXB2, OLIG2, ALX4, FOXD2, NKX2-5, DBX1, NKX2-2, NKX2-3, FOXD3, PITX2, PHOX2A, FOXL2, GSC, EPAS1, LMX1B, EMX1, TBX3, BARHL2, NR4A2, LMX1A, PROX1, SIX6, DLX2, ISL2, MSX1, HOXC11, HOXD3, NR5A2, LBX2	7.4645e-29	3.73225e-29	6.4043e-28	GOTERM_BP_FAT	GO:0045449~regulation of transcription	82	1.61843e-09	CDX2, RSF1, FOXK1, EVX2, ZNF295, KCNIP3, ATOH1, CDCA7, MIER1, FOXF1, MIER3, PAX8, NR2F2, NFIL3, INSR, PTPRK, LBX1, EGR2, DMRT3, EMX2, BARHL2, TLE3, CDC5L, SIX6, TBR1, ZFP37, HES4, JUN, KHSRP, VGLL2, TFAP2D, CARM1, SMARCA2, IRAK1BP1, ABLIM2, BLM, HOXA11, ONECUT2, NFIX, PRDM16, OTP, ARX, PRDM13, PRDM12, PRDM15, CDYL, HOXA3, LHX2, PPP2CA, RQCD1, ZNF471, SUPT7L, POU3F2, BCOR, LHX9, NKX2-2, SIM1, FOXD…	2.96658e-06	2.96658e-06	2.75427e-06	GOTERM_MF_FAT	GO:0043565~sequence-specific DNA binding	22	3.79833e-14	PHOX2B, LBX1, CDX4, ONECUT2, BARHL2, IRX1, NR4A2, SIX2, NFIX, VAX1, EN2, PAX3, PRDM16, WT1, MEIS2, HAND2, DLX4, SHOX, FOXB2, FOXD1, NKX2-2, FOXD3	4.32854e-12	4.32854e-12	4.31766e-11
GOTERM_BP_FAT	GO:0031328~positive regulation of cellular biosynthetic process	28	9.98678e-06	HOXA13, FOXA2, GLIS1, RBM4, PAX6, SOX4, PRDM16, GDNF, GLI3, CBFB, MLL5, POU3F3, MAML3, NR2F2, ING1, MYC, FOXD3, CEBPA, ICAM1, IRS2, TBX5, FOXA1, ITGA2, TRIM24, NR4A3, DLX2, NOTCH1, FOXC1	0.0174429	0.00584843	0.0169151	SP_PIR_KEYWORDS	Homeobox	26	2.49315e-24	IRX6, CDX4, EVX2, IRX1, LHX1, PAX7, LHX2, ALX4, NKX2-5, NKX2-2, PITX2, NKX2-3, PHOX2A, GSC, EMX1, LMX1B, BARHL2, LMX1A, SIX6, PROX1, DLX2, ISL2, HOXC11, MSX1, HOXD3, LBX2	4.23836e-22	2.11918e-22	3.0416e-21	GOTERM_BP_FAT	GO:0051252~regulation of RNA metabolic process	64	3.58738e-09	CDX2, RSF1, FOXK1, EVX2, HNRPLL, KCNIP3, ATOH1, FOXF1, PAX8, NR2F2, NFIL3, INSR, LBX1, EGR2, DMRT3, EMX2, BARHL2, TLE3, CDC5L, TBR1, SIX6, ZFP37, HES4, JUN, VGLL2, TFAP2D, CARM1, SMARCA2, ABLIM2, HOXA11, ONECUT2, NFIX, PRDM16, OTP, ARX, PRDM15, HOXA3, LHX2, ZNF471, POU3F2, BCOR, LHX9, SIM1, NKX2-2, FOXD3, ZNF528, ERG, MAFB, SMAD7, TAF7, L3MBTL, GRIN1, NR4A2, NEUROG2, ELAVL2, ISL2, DLX1, ATF3, CDK…	6.57564e-06	3.28783e-06	6.10505e-06	SP_PIR_KEYWORDS	Homeobox	14	1.0517e-12	PHOX2B, LBX1, CDX4, ONECUT2, BARHL2, IRX1, SIX2, EN2, PAX3, VAX1, MEIS2, DLX4, SHOX, NKX2-2	1.24102e-10	6.20511e-11	1.20363e-09
SP_PIR_KEYWORDS	nucleus	97	1.07588e-05	FGF14, U2AF2, LSM6, RBM15B, RBM4, CBX8, CBFB, HOXD11, MLL5, SFRS5, LSM1, ATOH7, ZC3HC1, SNRPN, SF3B14, TRIM41, PPP1CC, BAZ1B, EP400, BAT2, CAMTA1, HOXA13, SOX4, IGF2BP3, ZNF331, DAZAP1, MEIS3, LHX5, MAML3, CSTF2, EPB41, FOXA1, NUF2, MPHOSPH10, SSB, NR4A3, DLX2, NOTCH1, CDKN1B, BCL6B, POP4, ZNF319, RNPC3, FOXA2, POU6F2, PAX6, PTMA, GLI3, FUBP1, CCNE2, HIST2H2AC, NR2F6, NR2F2, MYC, ELP3, RBBP4, ZNF…	0.00293286	0.00293286	0.0141692	UP_SEQ_FEATURE	DNA-binding region:Homeobox	23	1.64476e-22	PHOX2A, GSC, EMX1, LMX1B, CDX4, EVX2, BARHL2, LMX1A, SIX6, DLX2, ISL2, HOXC11, MSX1, LHX1, PAX7, HOXD3, LHX2, ALX4, NKX2-5, LBX2, NKX2-2, PITX2, NKX2-3	7.00668e-20	7.00668e-20	2.31514e-19	GOTERM_BP_FAT	GO:0006355~regulation of transcription, DNA-dependent	63	3.6511e-09	CDX2, RSF1, FOXK1, EVX2, KCNIP3, ATOH1, FOXF1, PAX8, NR2F2, NFIL3, INSR, LBX1, EGR2, DMRT3, EMX2, BARHL2, TLE3, CDC5L, TBR1, SIX6, ZFP37, HES4, JUN, VGLL2, TFAP2D, CARM1, SMARCA2, ABLIM2, HOXA11, ONECUT2, NFIX, PRDM16, OTP, ARX, PRDM15, HOXA3, LHX2, ZNF471, POU3F2, BCOR, LHX9, SIM1, NKX2-2, FOXD3, ZNF528, ERG, MAFB, SMAD7, TAF7, L3MBTL, GRIN1, NR4A2, NEUROG2, ELAVL2, ISL2, DLX1, ATF3, CDKN1B, ID2…	6.69245e-06	2.23082e-06	6.2135e-06	INTERPRO	IPR001356:Homeobox	14	1.17524e-12	PHOX2B, LBX1, CDX4, ONECUT2, BARHL2, IRX1, SIX2, EN2, PAX3, VAX1, MEIS2, DLX4, SHOX, NKX2-2	1.61014e-10	1.61014e-10	1.38145e-09
GOTERM_BP_FAT	GO:0009891~positive regulation of biosynthetic process	28	1.23506e-05	HOXA13, FOXA2, GLIS1, RBM4, PAX6, SOX4, PRDM16, GDNF, GLI3, CBFB, MLL5, POU3F3, MAML3, NR2F2, ING1, MYC, FOXD3, CEBPA, ICAM1, IRS2, TBX5, FOXA1, ITGA2, TRIM24, NR4A3, DLX2, NOTCH1, FOXC1	0.0215268	0.00542571	0.0209184	INTERPRO	IPR017970:Homeobox, conserved site	25	1.87551e-22	IRX6, CDX4, EVX2, IRX1, LHX1, PAX7, LHX2, ALX4, NKX2-5, NKX2-2, PITX2, NKX2-3, PHOX2A, GSC, EMX1, LMX1B, BARHL2, LMX1A, SIX6, DLX2, ISL2, HOXC11, MSX1, HOXD3, LBX2	3.60099e-20	3.60099e-20	2.33504e-19	SP_PIR_KEYWORDS	transcription regulation	62	4.38881e-08	CDX2, RSF1, FOXK1, ZNF295, KCNIP3, ATOH1, CDCA7, MIER1, FOXF1, MIER3, PAX8, NR2F2, NFIL3, LBX1, EGR2, DMRT3, BARHL2, TLE3, CDC5L, TBR1, ZFP37, HES4, JUN, KHSRP, VGLL2, TFAP2D, CARM1, SMARCA2, IRAK1BP1, HOXA11, ONECUT2, NFIX, PRDM16, OTP, ARX, PRDM13, PRDM12, PRDM15, CDYL, HOXA3, LHX2, RQCD1, ZNF471, SUPT7L, POU3F2, BCOR, SIM1, FOXD3, ZNF528, ERG, MAFB, SMAD7, C17ORF81, TAF7, L3MBTL, NR4A2, NEUROG…	1.39563e-05	1.39563e-05	5.91686e-05	INTERPRO	IPR017970:Homeobox, conserved site	14	1.25404e-12	PHOX2B, LBX1, CDX4, ONECUT2, BARHL2, IRX1, SIX2, EN2, PAX3, VAX1, MEIS2, DLX4, SHOX, NKX2-2	1.71798e-10	8.58987e-11	1.47397e-09
GOTERM_BP_FAT	GO:0010557~positive regulation of macromolecule biosynthetic process	27	1.39601e-05	HOXA13, FOXA2, GLIS1, RBM4, PAX6, SOX4, PRDM16, GDNF, GLI3, CBFB, MLL5, POU3F3, MAML3, NR2F2, ING1, MYC, FOXD3, CEBPA, IRS2, TBX5, FOXA1, ITGA2, TRIM24, NR4A3, DLX2, NOTCH1, FOXC1	0.0242979	0.0049075	0.0236441	INTERPRO	IPR001356:Homeobox	25	2.55524e-22	IRX6, CDX4, EVX2, IRX1, LHX1, PAX7, LHX2, ALX4, NKX2-5, NKX2-2, PITX2, NKX2-3, PHOX2A, GSC, EMX1, LMX1B, BARHL2, LMX1A, SIX6, DLX2, ISL2, HOXC11, MSX1, HOXD3, LBX2	4.90607e-20	2.45303e-20	3.18131e-19	SP_PIR_KEYWORDS	Transcription	63	4.39157e-08	CDX2, RSF1, FOXK1, ZNF295, KCNIP3, ATOH1, CDCA7, MIER1, FOXF1, MIER3, PAX8, NR2F2, NFIL3, LBX1, EGR2, DMRT3, BARHL2, TLE3, POLR1A, CDC5L, TBR1, ZFP37, HES4, JUN, KHSRP, VGLL2, TFAP2D, CARM1, SMARCA2, IRAK1BP1, HOXA11, ONECUT2, NFIX, PRDM16, OTP, ARX, PRDM13, PRDM12, PRDM15, CDYL, HOXA3, LHX2, RQCD1, ZNF471, SUPT7L, POU3F2, BCOR, SIM1, FOXD3, ZNF528, ERG, MAFB, SMAD7, C17ORF81, TAF7, L3MBTL, NR4A2…	1.39651e-05	6.98257e-06	5.92059e-05	INTERPRO	IPR012287:Homeodomain-related	14	2.08165e-12	PHOX2B, LBX1, CDX4, ONECUT2, BARHL2, IRX1, SIX2, EN2, PAX3, VAX1, MEIS2, DLX4, SHOX, NKX2-2	2.85189e-10	9.50628e-11	2.44683e-09
GOTERM_BP_FAT	GO:0045941~positive regulation of transcription	25	1.57625e-05	FOXA2, HOXA13, GLIS1, RBM4, PAX6, SOX4, PRDM16, GDNF, GLI3, CBFB, MLL5, POU3F3, MAML3, NR2F2, ING1, MYC, FOXD3, CEBPA, TBX5, FOXA1, TRIM24, NR4A3, DLX2, NOTCH1, FOXC1	0.0273916	0.00461826	0.0266964	INTERPRO	IPR012287:Homeodomain-related	24	7.43679e-21	PHOX2A, IRX6, GSC, EMX1, LMX1B, CDX4, EVX2, BARHL2, IRX1, LMX1A, SIX6, DLX2, HOXC11, MSX1, LHX1, PAX7, HOXD3, LHX2, ALX4, NKX2-5, LBX2, NKX2-2, PITX2, NKX2-3	1.42786e-18	4.75954e-19	9.25891e-18	GOTERM_MF_FAT	GO:0003700~transcription factor activity	41	6.6396e-08	CDX2, FOXK1, EVX2, HOXA11, ONECUT2, NFIX, OTP, ARX, ATOH1, HOXA3, FOXF1, LHX2, PAX8, POU3F2, NR2F2, NFIL3, LHX9, SIM1, NKX2-2, FOXD3, ERG, LBX1, EGR2, SMAD7, MAFB, DMRT3, TAF7, EMX2, L3MBTL, BARHL2, NR4A2, SIX6, TBR1, ZFP37, ISL2, DLX1, ATF3, JUN, EBF1, FOXE1, TFAP2D	2.68236e-05	1.34119e-05	9.27436e-05	GOTERM_MF_FAT	GO:0003700~transcription factor activity	23	4.06819e-11	PHOX2B, TBX15, LBX1, CDX4, ONECUT2, BARHL2, IRX1, NR4A2, SIX2, NFIX, VAX1, EN2, PAX3, WT1, MEIS2, HAND2, DLX4, SHOX, FOXB2, FOXD1, NKX2-2, SIM1, FOXD3	4.63774e-09	2.31887e-09	4.6266e-08
GOTERM_BP_FAT	GO:0010628~positive regulation of gene expression	25	2.2459e-05	FOXA2, HOXA13, GLIS1, RBM4, PAX6, SOX4, PRDM16, GDNF, GLI3, CBFB, MLL5, POU3F3, MAML3, NR2F2, ING1, MYC, FOXD3, CEBPA, TBX5, FOXA1, TRIM24, NR4A3, DLX2, NOTCH1, FOXC1	0.0388004	0.00563736	0.038036	SMART	SM00389:HOX	25	5.28232e-19	IRX6, CDX4, EVX2, IRX1, LHX1, PAX7, LHX2, ALX4, NKX2-5, NKX2-2, PITX2, NKX2-3, PHOX2A, GSC, EMX1, LMX1B, BARHL2, LMX1A, SIX6, DLX2, ISL2, HOXC11, MSX1, HOXD3, LBX2	2.85245e-17	2.85245e-17	5.17485e-16	GOTERM_MF_FAT	GO:0030528~transcription regulator activity	54	7.19789e-08	RSF1, CDX2, FOXK1, EVX2, KCNIP3, ATOH1, FOXF1, PAX8, NR2F2, NFIL3, EGR2, LBX1, DMRT3, BARHL2, EMX2, TBR1, SIX6, ZFP37, HES4, JUN, VGLL2, TFAP2D, CARM1, SMARCA2, HOXA11, ONECUT2, NFIX, PRDM16, OTP, ARX, HOXA3, LHX2, POU3F2, SUPT7L, BCOR, APEX1, LHX9, SIM1, NKX2-2, FOXD3, ERG, MAFB, SMAD7, TAF7, L3MBTL, NR4A2, NEUROG2, ISL2, DLX1, ATF3, ID2, EBF3, EBF1, FOXE1	2.90791e-05	9.69311e-06	0.000100542	UP_SEQ_FEATURE	DNA-binding region:Homeobox	12	5.19222e-11	PHOX2B, LBX1, CDX4, BARHL2, DLX4, ONECUT2, SHOX, SIX2, EN2, VAX1, PAX3, NKX2-2	1.64593e-08	1.64593e-08	6.99666e-08
GOTERM_MF_FAT	GO:0003700~transcription factor activity	36	2.44992e-05	IRX3, HOXA13, FOXA2, POU6F2, IRX1, PAX6, SOX4, GLI3, CBFB, ZNF174, HOXD11, ZFP36L1, FUBP1, NPAS1, MEIS3, GBX2, NR2F6, POU3F3, LHX5, TLX3, NR2F2, MYC, NFATC1, FOXD3, CEBPA, TBX5, FOXA1, AFF4, GTF2H4, NR4A3, FOSB, MYT1L, DLX2, NOTCH1, BAZ1B, FOXC1	0.00953358	0.00318801	0.0340531									SP_PIR_KEYWORDS	dna-binding	57	1.90288e-07	CDX2, FOXK1, EVX2, ZNF295, ATOH1, FOXF1, PAX8, NR2F2, NFIL3, LBX1, EGR2, HIST1H1C, DMRT3, EMX2, BARHL2, CDC5L, TBR1, SIX6, ZFP37, HES4, JUN, KHSRP, TFAP2D, SMARCA2, BLM, HOXA11, ONECUT2, NFIX, PRDM16, OTP, ARX, PRDM13, PRDM12, PRDM15, HOXA3, LHX2, ZNF471, POU3F2, LHX9, SIM1, NKX2-2, FOXD3, ZNF528, ERG, MAFB, L3MBTL, NR4A2, NEUROG2, FEZF2, ISL2, DLX1, ATF3, EBF3, ZIC4, EBF1, ZIC5, FOXE1	6.05097e-05	2.01703e-05	0.00025654	GOTERM_MF_FAT	GO:0030528~transcription regulator activity	27	1.45816e-10	CDX4, IRX1, ONECUT2, NFIX, PAX3, PRDM16, WT1, MEIS2, OLIG3, HAND2, FOXB2, FOXD1, NKX2-2, SIM1, TWIST1, FOXD3, PHOX2B, TBX15, LBX1, BARHL2, NR4A2, SIX2, EN2, VAX1, EBF2, DLX4, SHOX	1.6623e-08	5.541e-09	1.65831e-07
GOTERM_BP_FAT	GO:0045893~positive regulation of transcription, DNA-dependent	22	3.74331e-05	CEBPA, FOXA2, HOXA13, TBX5, GLIS1, FOXA1, RBM4, PAX6, SOX4, NR4A3, PRDM16, GDNF, CBFB, DLX2, MLL5, NOTCH1, POU3F3, FOXC1, MAML3, NR2F2, MYC, FOXD3	0.0638301	0.00821089	0.0633882	Annotation Cluster 2	Enrichment Score: 20.682722188574658							SP_PIR_KEYWORDS	nucleus	102	4.2659e-07	PRPF4B, CDX2, LSM6, STK35, LEMD2, DCPS, ATOH1, CDCA7, MIER1, FOXF1, MIER3, DND1, MAP2K7, LBX1, EMX2, BARHL2, TBR1, SIX6, CEP350, HES4, JUN, PSMA3, SNTG1, VGLL2, TFAP2D, SMARCA2, IRAK1BP1, BLM, HOXA11, ONECUT2, COIL, OTP, ARX, HOXA3, LHX2, ISY1, NAT10, SUPT7L, BCOR, LHX9, NKX2-2, ZNF528, MAFB, SMAD7, L3MBTL, TAF7, NR4A2, NEUROG2, MALT1, FEZF2, DLX1, ATF3, CDKN1B, EBF3, ZIC4, C1ORF61, EBF1, ZIC5, R…	0.000135647	2.71308e-05	0.000575115	GOTERM_MF_FAT	GO:0003677~DNA binding	32	1.82683e-10	CDX4, IRX1, ONECUT2, NFIX, PAX3, PRDM16, LIN28B, WT1, ZIC2, MEIS2, OLIG3, PAX9, HAND2, FOXB2, SOX17, FOXD1, NKX2-2, SIM1, TWIST1, FOXD3, PHOX2B, TBX15, LBX1, BARHL2, NR4A2, SIX2, VAX1, EN2, FEZF2, EBF2, DLX4, SHOX	2.08258e-08	5.20646e-09	2.07758e-07
GOTERM_BP_FAT	GO:0051173~positive regulation of nitrogen compound metabolic process	26	4.22696e-05	FOXA2, HOXA13, GLIS1, RBM4, PAX6, SOX4, PRDM16, GDNF, GLI3, CBFB, MLL5, POU3F3, MAML3, NR2F2, ING1, MYC, FOXD3, CEBPA, ICAM1, TBX5, FOXA1, TRIM24, NR4A3, DLX2, NOTCH1, FOXC1	0.0717745	0.00824147	0.0715755	Category	Term	Count	PValue	Genes	Bonferroni	Benjamini	FDR	GOTERM_BP_FAT	GO:0006350~transcription	65	9.38202e-07	CDX2, RSF1, FOXK1, ZNF295, KCNIP3, ATOH1, CDCA7, MIER1, FOXF1, MIER3, PAX8, NR2F2, NFIL3, LBX1, EGR2, DMRT3, BARHL2, TLE3, POLR1A, CDC5L, TBR1, ZFP37, HES4, JUN, KHSRP, VGLL2, TFAP2D, CARM1, SMARCA2, IRAK1BP1, HOXA11, ONECUT2, NFIX, PRDM16, OTP, ARX, PRDM13, PRDM12, PRDM15, CDYL, HOXA3, LHX2, RQCD1, ZNF471, SUPT7L, POU3F2, BCOR, APEX1, SIM1, FOXD3, ZNF528, ERG, MAFB, SMAD7, C17ORF81, L3MBTL, TAF7…	0.00171825	0.000343886	0.00159663	GOTERM_BP_FAT	GO:0006355~regulation of transcription, DNA-dependent	28	1.94386e-10	CDX4, IRX1, ONECUT2, NFIX, PAX3, PRDM16, LIN28B, WT1, MEIS2, PAX9, HAND2, FOXB2, FOXD1, NKX2-2, SIM1, TWIST1, FOXD3, PHOX2B, TBX15, LBX1, BARHL2, NR4A2, SIX2, VAX1, EN2, EBF2, DLX4, SHOX	9.89424e-08	9.89424e-08	2.80626e-07
GOTERM_BP_FAT	GO:0051254~positive regulation of RNA metabolic process	22	4.28527e-05	CEBPA, FOXA2, HOXA13, TBX5, GLIS1, FOXA1, RBM4, PAX6, SOX4, NR4A3, PRDM16, GDNF, CBFB, DLX2, MLL5, NOTCH1, POU3F3, FOXC1, MAML3, NR2F2, MYC, FOXD3	0.0727277	0.00752237	0.0725625	GOTERM_MF_FAT	GO:0003700~transcription factor activity	51	1.85242e-31	SOX21, HELT, EVX2, CDX4, PAX7, GATA4, FOXB2, OLIG2, ALX4, PITX2, PHOX2A, TBX15, GSC, EMX1, BARHL2, MXD1, TBR1, SIX6, PROX1, HOXC11, MSX1, HOXD3, TFAP2A, LBX2, IRX6, SOX1, IRX1, SOX9, WT1, ATF1, TCF21, LHX1, LHX2, FOXD2, NKX2-5, DBX1, SIM1, NKX2-2, NKX2-3, FOXD3, ZNF423, FOXL2, TBX3, LMX1B, EPAS1, NR4A2, LMX1A, DLX2, ISL2, EBF1, NR5A2	2.53781e-29	2.53781e-29	2.17736e-28	GOTERM_MF_FAT	GO:0003677~DNA binding	65	4.11564e-06	CDX2, FOXK1, EVX2, ZNF295, KCNIP3, ATOH1, MIER1, FOXF1, MIER3, PAX8, NR2F2, NFIL3, LBX1, EGR2, HIST1H1C, DMRT3, EMX2, BARHL2, POLR1A, CDC5L, TBR1, SIX6, ZFP37, HES4, JUN, KHSRP, TFAP2D, SMARCA2, BLM, HOXA11, ONECUT2, WBP11, NFIX, PRDM16, OTP, ARX, PRDM13, PRDM12, PRDM15, HOXA3, LHX2, ZNF471, POU3F2, LHX9, APEX1, SIM1, NKX2-2, FOXD3, ZNF528, ERG, MAFB, SMAD7, TAF7, L3MBTL, NR4A2, NEUROG2, FEZF2, I…	0.00166134	0.000415594	0.00574868	SMART	SM00389:HOX	14	2.76025e-10	PHOX2B, LBX1, CDX4, ONECUT2, BARHL2, IRX1, SIX2, EN2, PAX3, VAX1, MEIS2, DLX4, SHOX, NKX2-2	1.21451e-08	1.21451e-08	2.58242e-07
GOTERM_BP_FAT	GO:0045935~positive regulation of nucleobase, nucleoside, nucleotide and nucleic acid metabolic process	25	7.84026e-05	FOXA2, HOXA13, GLIS1, RBM4, PAX6, SOX4, PRDM16, GDNF, GLI3, CBFB, MLL5, POU3F3, MAML3, NR2F2, ING1, MYC, FOXD3, CEBPA, TBX5, FOXA1, TRIM24, NR4A3, DLX2, NOTCH1, FOXC1	0.129033	0.0105707	0.132722	GOTERM_MF_FAT	GO:0043565~sequence-specific DNA binding	43	5.44854e-31	IRX6, SOX1, EVX2, CDX4, IRX1, PRDM16, SOX9, ATF1, WT1, TCF21, LHX1, LHX2, PAX7, GATA4, FOXB2, OLIG2, ALX4, FOXD2, NKX2-5, DBX1, NKX2-2, NKX2-3, FOXD3, PITX2, PHOX2A, FOXL2, GSC, EPAS1, LMX1B, EMX1, TBX3, BARHL2, NR4A2, LMX1A, PROX1, SIX6, DLX2, ISL2, MSX1, HOXC11, HOXD3, NR5A2, LBX2	7.4645e-29	3.73225e-29	6.4043e-28	GOTERM_BP_FAT	GO:0010557~positive regulation of macromolecule biosynthetic process	29	6.13592e-06	ABLIM2, RSF1, CDX2, FOXK1, BLM, ONECUT2, PRDM16, ATOH1, FOXF1, PAX8, POU3F2, NR2F2, INSR, NKX2-2, FOXD3, EGR2, MAFB, GRIN1, BARHL2, TAF7, NR4A2, NEUROG2, TBR1, EBF3, JUN, EBF1, FOXE1, VGLL2, SMARCA2	0.0111842	0.000936826	0.0104417	GOTERM_BP_FAT	GO:0051252~regulation of RNA metabolic process	28	3.40765e-10	CDX4, IRX1, ONECUT2, NFIX, PAX3, PRDM16, LIN28B, WT1, MEIS2, PAX9, HAND2, FOXB2, FOXD1, NKX2-2, SIM1, TWIST1, FOXD3, PHOX2B, TBX15, LBX1, BARHL2, NR4A2, SIX2, VAX1, EN2, EBF2, DLX4, SHOX	1.73449e-07	8.67246e-08	4.91946e-07
GOTERM_BP_FAT	GO:0010604~positive regulation of macromolecule metabolic process	30	9.16382e-05	HOXA13, FOXA2, GLIS1, RBM4, PAX6, SOX4, PRDM16, GDNF, GLI3, CBFB, MLL5, BCL2, POU3F3, PCSK9, MAML3, NR2F2, ING1, MYC, FOXD3, CEBPA, IRS2, TBX5, FOXA1, ITGA2, TRIM24, NR4A3, DLX2, CCND1, NOTCH1, FOXC1	0.149111	0.0114676	0.155111	SP_PIR_KEYWORDS	dna-binding	58	2.56641e-28	SOX21, HELT, EVX2, CDX4, ZIC2, PAX7, GATA4, FOXB2, OLIG2, ALX4, PITX2, PHOX2A, TBX15, GSC, EMX1, BARHL2, ZNF501, ZNF790, MXD1, PROX1, TBR1, SIX6, MSX1, HOXC11, HOXD3, TFAP2A, LBX2, IRX6, SOX1, IRX1, PRDM16, SOX9, WT1, ATF1, TCF21, PRDM15, LHX1, LHX2, FOXD2, NKX2-5, SIM1, NKX2-2, ZNF423, NKX2-3, FOXD3, FOXL2, EPAS1, LMX1B, TBX3, NR4A2, LMX1A, FEZF1, FEZF2, DLX2, ISL2, EBF2, EBF1, NR5A2	4.3629e-26	4.3629e-26	3.13098e-25	GOTERM_BP_FAT	GO:0006357~regulation of transcription from RNA polymerase II promoter	29	0.000110088	ABLIM2, CDX2, FOXK1, ONECUT2, PRDM16, KCNIP3, ATOH1, PAX8, POU3F2, NR2F2, BCOR, NKX2-2, FOXD3, EGR2, LBX1, SMAD7, MAFB, GRIN1, BARHL2, TAF7, NR4A2, NEUROG2, TBR1, DLX1, ID2, JUN, FOXE1, VGLL2, SMARCA2	0.182744	0.0125334	0.187184	GOTERM_BP_FAT	GO:0045449~regulation of transcription	32	1.98196e-09	CDX4, IRX1, ONECUT2, NFIX, PAX3, PRDM16, LIN28B, WT1, MEIS2, OLIG3, PAX9, HAND2, FOXB2, SOX17, FOXD1, NKX2-2, SIM1, TWIST1, FOXD3, PHOX2B, TBX15, LBX1, ZBTB46, BARHL2, NR4A2, SIX2, VAX1, EN2, FEZF2, EBF2, DLX4, SHOX	1.00882e-06	3.36273e-07	2.86127e-06
SP_PIR_KEYWORDS	Transcription	53	0.000104954	FOXA2, POU6F2, RBM15B, RBM4, PAX6, CBX8, GLI3, CBFB, HOXD11, FUBP1, MLL5, NR2F6, ATOH7, NR2F2, MYC, ELP3, RBBP4, ZNF544, GTF2H4, ZNF684, LPIN1, MCM6, MYT1L, BAZ1B, FOXC1, IRX3, CAMTA1, HOXA13, GLIS1, CTNND2, SOX4, PRDM16, ZNF331, ZNF174, ZNF30, NPAS1, NPAS3, BCL11A, GBX2, LHX5, POU3F3, MAML3, NFATC1, FOXD3, INSM1, CEBPA, TBX5, FOXA1, AFF4, TRIM24, NR4A3, NOTCH1, ZNF319	0.0282473	0.00950585	0.138144	GOTERM_MF_FAT	GO:0030528~transcription regulator activity	53	1.53266e-24	SOX21, HELT, EVX2, CDX4, PAX7, GATA4, FOXB2, OLIG2, ALX4, PITX2, PHOX2A, TBX15, GSC, EMX1, BARHL2, MXD1, TBR1, SIX6, PROX1, HOXC11, MSX1, HOXD3, TFAP2A, LBX2, IRX6, SOX1, IRX1, SOX9, PRDM16, WT1, ATF1, TCF21, LHX1, LHX2, FOXD2, NKX2-5, DBX1, SIM1, NKX2-2, ZNF423, NKX2-3, FOXD3, FOXL2, EPAS1, TBX3, LMX1B, NR4A2, LMX1A, DLX2, ISL2, EBF2, EBF1, NR5A2	2.09974e-22	6.99915e-23	1.80151e-21									SP_PIR_KEYWORDS	transcription regulation	26	3.71781e-09	CDX4, ONECUT2, NFIX, PAX3, PRDM16, WT1, PAX9, OLIG3, HAND2, FOXB2, SOX17, FOXD1, SIM1, TWIST1, FOXD3, PHOX2B, TBX15, ZBTB46, LBX1, BARHL2, NR4A2, EN2, VAX1, FEZF2, EBF2, SHOX	4.38702e-07	1.09676e-07	4.25481e-06
GOTERM_BP_FAT	GO:0051252~regulation of RNA metabolic process	49	0.000105884	FOXA2, POU6F2, RBM15B, RBM4, PAX6, GDNF, CBFB, HOXD11, MLL5, NR2F6, NR2F2, MYC, ELP3, ZNF544, GTF2H4, ZNF684, FOSB, MYT1L, FOXC1, IRX3, HOXA13, GLIS1, IRX1, SOX4, PRDM16, ZNF331, ZNF174, ZNF30, ZFP36L1, NPAS1, RPS26, MEIS3, NPAS3, GBX2, LHX5, POU3F3, MAML3, TLX3, NFATC1, FOXD3, CEBPA, TBX5, FOXA1, TRIM24, NR4A3, DLX2, NOTCH1, CDKN1B, BCL6B	0.170206	0.0115934	0.179204	SP_PIR_KEYWORDS	Homeobox	26	2.49315e-24	IRX6, CDX4, EVX2, IRX1, LHX1, PAX7, LHX2, ALX4, NKX2-5, NKX2-2, PITX2, NKX2-3, PHOX2A, GSC, EMX1, LMX1B, BARHL2, LMX1A, SIX6, PROX1, DLX2, ISL2, HOXC11, MSX1, HOXD3, LBX2	4.23836e-22	2.11918e-22	3.0416e-21	Annotation Cluster 2	Enrichment Score: 5.454603194262465							SP_PIR_KEYWORDS	Transcription	25	3.24623e-08	CDX4, ONECUT2, NFIX, PAX3, PRDM16, WT1, PAX9, OLIG3, HAND2, FOXB2, SOX17, FOXD1, SIM1, TWIST1, FOXD3, PHOX2B, ZBTB46, LBX1, TBX15, BARHL2, NR4A2, VAX1, FEZF2, EBF2, SHOX	3.83054e-06	7.6611e-07	3.71511e-05
SP_PIR_KEYWORDS	transcription regulation	52	0.000110273	FOXA2, POU6F2, RBM15B, RBM4, PAX6, CBX8, GLI3, HOXD11, FUBP1, MLL5, NR2F6, ATOH7, NR2F2, MYC, ELP3, RBBP4, ZNF544, GTF2H4, ZNF684, LPIN1, MCM6, MYT1L, BAZ1B, FOXC1, IRX3, CAMTA1, HOXA13, GLIS1, CTNND2, SOX4, PRDM16, ZNF331, ZNF174, ZNF30, NPAS1, NPAS3, BCL11A, GBX2, LHX5, POU3F3, MAML3, NFATC1, FOXD3, INSM1, CEBPA, TBX5, FOXA1, AFF4, TRIM24, NR4A3, NOTCH1, ZNF319	0.0296576	0.00749832	0.14514	GOTERM_MF_FAT	GO:0003677~DNA binding	60	1.0138e-21	SOX21, HELT, EVX2, CDX4, ZIC2, PAX7, GATA4, FOXB2, OLIG2, ALX4, PITX2, PHOX2A, TBX15, GSC, EMX1, BARHL2, ZNF501, ZNF790, MXD1, PROX1, TBR1, SIX6, MSX1, HOXC11, HOXD3, TFAP2A, LBX2, IRX6, SOX1, IRX1, PRDM16, SOX9, LIN28B, WT1, ATF1, TCF21, PRDM15, LHX1, LHX2, FOXD2, NKX2-5, DBX1, SIM1, NKX2-2, ZNF423, NKX2-3, FOXD3, FOXL2, EPAS1, LMX1B, TBX3, NR4A2, LMX1A, FEZF1, FEZF2, DLX2, ISL2, EBF2, EBF1, NR5…	1.38891e-19	3.47227e-20	1.19164e-18	Category	Term	Count	PValue	Genes	Bonferroni	Benjamini	FDR	GOTERM_BP_FAT	GO:0006350~transcription	25	1.61258e-06	CDX4, ONECUT2, NFIX, PAX3, PRDM16, WT1, PAX9, OLIG3, HAND2, FOXB2, SOX17, FOXD1, SIM1, TWIST1, FOXD3, PHOX2B, ZBTB46, LBX1, TBX15, BARHL2, NR4A2, VAX1, FEZF2, EBF2, SHOX	0.000820465	0.000164147	0.00232797
GOTERM_BP_FAT	GO:0045944~positive regulation of transcription from RNA polymerase II promoter	18	0.000144421	CEBPA, FOXA2, HOXA13, TBX5, GLIS1, FOXA1, RBM4, PAX6, NR4A3, GDNF, CBFB, DLX2, NOTCH1, POU3F3, FOXC1, MAML3, MYC, FOXD3	0.224686	0.0148584	0.24435	GOTERM_BP_FAT	GO:0006355~regulation of transcription, DNA-dependent	54	3.85382e-21	SOX21, HELT, EVX2, CDX4, PAX7, GATA4, FOXB2, OLIG2, ALX4, PITX2, PHOX2A, TBX15, GSC, EMX1, BARHL2, ZNF790, TBR1, SIX6, PROX1, MSX1, HOXC11, HOXD3, TFAP2A, LBX2, IRX6, SOX1, IRX1, PRDM16, SOX9, LIN28B, WT1, ATF1, TCF21, PRDM15, LHX1, LHX2, FOXD2, NKX2-5, DBX1, SIM1, NKX2-2, NKX2-3, FOXD3, FOXL2, EPAS1, TBX3, LMX1B, NR4A2, LMX1A, DLX2, ISL2, EBF2, EBF1, NR5A2	3.96558e-18	3.96558e-18	6.11111e-18	GOTERM_BP_FAT	GO:0051252~regulation of RNA metabolic process	64	3.58738e-09	CDX2, RSF1, FOXK1, EVX2, HNRPLL, KCNIP3, ATOH1, FOXF1, PAX8, NR2F2, NFIL3, INSR, LBX1, EGR2, DMRT3, EMX2, BARHL2, TLE3, CDC5L, TBR1, SIX6, ZFP37, HES4, JUN, VGLL2, TFAP2D, CARM1, SMARCA2, ABLIM2, HOXA11, ONECUT2, NFIX, PRDM16, OTP, ARX, PRDM15, HOXA3, LHX2, ZNF471, POU3F2, BCOR, LHX9, SIM1, NKX2-2, FOXD3, ZNF528, ERG, MAFB, SMAD7, TAF7, L3MBTL, GRIN1, NR4A2, NEUROG2, ELAVL2, ISL2, DLX1, ATF3, CDK…	6.57564e-06	3.28783e-06	6.10505e-06	SP_PIR_KEYWORDS	nucleus	33	2.82399e-06	CDX4, IRX1, ONECUT2, NFIX, PAX3, PRDM16, LIN28B, WT1, ZIC2, MEIS2, OLIG3, PAX9, HAND2, FOXB2, SOX17, FOXD1, SIM1, NKX2-2, TWIST1, FOXD3, PHOX2B, TBX15, LBX1, ZBTB46, BARHL2, NR4A2, SIX2, VAX1, EN2, FEZF2, EBF2, DLX4, SHOX	0.000333176	5.55371e-05	0.00323184
GOTERM_BP_FAT	GO:0045449~regulation of transcription	62	0.000343961	FOXA2, POU6F2, RBM15B, RBM4, PAX6, CBX8, GLI3, GDNF, CBFB, HOXD11, FUBP1, MLL5, NR2F6, NR2F2, ATOH7, MYC, ICAM1, ELP3, RBBP4, ZNF544, GTF2H4, ZNF684, FOSB, MCM6, MYT1L, BAZ1B, FOXC1, CAMTA1, IRX3, HOXA13, GLIS1, IRX1, CTNND2, SOX4, PRDM16, ZNF331, ZNF174, ZNF30, NPAS1, MEIS3, NPAS3, BCL11A, GBX2, LHX5, POU3F3, MAML3, TLX3, ING1, NFATC1, FOXD3, INSM1, CEBPA, TBX5, FOXA1, AFF4, TRIM24, NR4A3, DLX2,…	0.454561	0.0284523	0.581035	GOTERM_BP_FAT	GO:0051252~regulation of RNA metabolic process	54	1.08224e-20	SOX21, HELT, EVX2, CDX4, PAX7, GATA4, FOXB2, OLIG2, ALX4, PITX2, PHOX2A, TBX15, GSC, EMX1, BARHL2, ZNF790, TBR1, SIX6, PROX1, MSX1, HOXC11, HOXD3, TFAP2A, LBX2, IRX6, SOX1, IRX1, PRDM16, SOX9, LIN28B, WT1, ATF1, TCF21, PRDM15, LHX1, LHX2, FOXD2, NKX2-5, DBX1, SIM1, NKX2-2, NKX2-3, FOXD3, FOXL2, EPAS1, TBX3, LMX1B, NR4A2, LMX1A, DLX2, ISL2, EBF2, EBF1, NR5A2	1.11362e-17	5.56811e-18	1.71613e-17	GOTERM_BP_FAT	GO:0006355~regulation of transcription, DNA-dependent	63	3.6511e-09	CDX2, RSF1, FOXK1, EVX2, KCNIP3, ATOH1, FOXF1, PAX8, NR2F2, NFIL3, INSR, LBX1, EGR2, DMRT3, EMX2, BARHL2, TLE3, CDC5L, TBR1, SIX6, ZFP37, HES4, JUN, VGLL2, TFAP2D, CARM1, SMARCA2, ABLIM2, HOXA11, ONECUT2, NFIX, PRDM16, OTP, ARX, PRDM15, HOXA3, LHX2, ZNF471, POU3F2, BCOR, LHX9, SIM1, NKX2-2, FOXD3, ZNF528, ERG, MAFB, SMAD7, TAF7, L3MBTL, GRIN1, NR4A2, NEUROG2, ELAVL2, ISL2, DLX1, ATF3, CDKN1B, ID2…	6.69245e-06	2.23082e-06	6.2135e-06	GOTERM_BP_FAT	GO:0030182~neuron differentiation	9	0.000848805	FEZF2, LBX1, BARHL2, ONECUT2, NR4A2, EN2, VAX1, PAX3, NKX2-2	0.350937	0.0213794	1.21842
SP_PIR_KEYWORDS	dna-binding	47	0.000387468	HIST1H2AB, IRX3, FOXA2, HOXA13, POU6F2, IRX1, GLIS1, PAX6, SOX4, PRDM16, GLI3, ZNF331, ZNF174, HOXD11, ZFP36L1, FUBP1, ZNF30, NPAS1, MEIS3, NPAS3, HIST2H2AC, NR2F6, GBX2, POU3F3, LHX5, TLX3, NR2F2, ATOH7, MYC, NFATC1, FOXD3, CEBPA, INSM1, TBX5, ZNF544, FOXA1, ZNF684, FOSB, NR4A3, TRIM24, MCM6, MYT1L, DLX2, BCL6B, FOXC1, ZNF319, EP400	0.100395	0.0209376	0.509121	GOTERM_BP_FAT	GO:0045449~regulation of transcription	60	4.62101e-18	SOX21, HELT, EVX2, CDX4, PAX7, GATA4, FOXB2, OLIG2, ALX4, PITX2, PHOX2A, TBX15, GSC, EMX1, BARHL2, ZNF501, ZNF790, MXD1, PROX1, TBR1, SIX6, MSX1, HOXC11, HOXD3, TFAP2A, LBX2, IRX6, SOX1, IRX1, PRDM16, SOX9, LIN28B, WT1, ATF1, TCF21, PRDM15, LHX1, LHX2, FOXD2, NKX2-5, DBX1, SIM1, NKX2-2, ZNF423, NKX2-3, FOXD3, FOXL2, EPAS1, LMX1B, TBX3, FZD1, NR4A2, LMX1A, FEZF1, FEZF2, DLX2, ISL2, EBF2, EBF1, NR5…	4.75502e-15	1.58501e-15	7.32767e-15	GOTERM_MF_FAT	GO:0030528~transcription regulator activity	54	7.19789e-08	RSF1, CDX2, FOXK1, EVX2, KCNIP3, ATOH1, FOXF1, PAX8, NR2F2, NFIL3, EGR2, LBX1, DMRT3, BARHL2, EMX2, TBR1, SIX6, ZFP37, HES4, JUN, VGLL2, TFAP2D, CARM1, SMARCA2, HOXA11, ONECUT2, NFIX, PRDM16, OTP, ARX, HOXA3, LHX2, POU3F2, SUPT7L, BCOR, APEX1, LHX9, SIM1, NKX2-2, FOXD3, ERG, MAFB, SMAD7, TAF7, L3MBTL, NR4A2, NEUROG2, ISL2, DLX1, ATF3, ID2, EBF3, EBF1, FOXE1	2.90791e-05	9.69311e-06	0.000100542
GOTERM_BP_FAT	GO:0006355~regulation of transcription, DNA-dependent	46	0.000462923	IRX3, FOXA2, HOXA13, POU6F2, RBM4, IRX1, GLIS1, PAX6, SOX4, PRDM16, GDNF, CBFB, ZNF331, ZNF174, HOXD11, ZNF30, NPAS1, MEIS3, MLL5, NPAS3, GBX2, NR2F6, POU3F3, LHX5, MAML3, TLX3, NR2F2, MYC, NFATC1, FOXD3, CEBPA, ELP3, TBX5, ZNF544, FOXA1, GTF2H4, ZNF684, FOSB, NR4A3, TRIM24, MYT1L, DLX2, NOTCH1, CDKN1B, BCL6B, FOXC1	0.557741	0.0364053	0.78125	SP_PIR_KEYWORDS	transcription regulation	47	5.10958e-17	SOX21, HELT, SOX1, CDX4, PRDM16, SOX9, ATF1, WT1, TCF21, PRDM15, LHX1, LHX2, PAX7, GATA4, FOXB2, OLIG2, ALX4, FOXD2, SIM1, ZNF423, NKX2-3, FOXD3, PHOX2A, FOXL2, TBX15, GSC, EPAS1, LMX1B, TBX3, BARHL2, ZNF501, ZNF790, NR4A2, LMX1A, MXD1, PROX1, TBR1, FEZF1, FEZF2, MSX1, HOXC11, HOXD3, EBF2, EBF1, TFAP2A, NR5A2, LBX2	8.68628e-15	2.17157e-15	6.2336e-14	GOTERM_BP_FAT	GO:0010604~positive regulation of macromolecule metabolic process	38	1.39314e-07	ABLIM2, RSF1, CDX2, BLM, FOXK1, BTRC, PRKAG2, ONECUT2, PRDM16, HNRPLL, AGTR1, ATOH1, FOXF1, PAX8, POU3F2, NR2F2, INSR, NKX2-2, FOXD3, EGR2, SMAD7, MAFB, TAF7, GRIN1, BARHL2, NR4A2, NEUROG2, TBR1, CDH13, EBF3, JUN, PSMA3, EBF1, FOXE1, VGLL2, JAK2, IFT88, SMARCA2	0.00025533	6.38387e-05	0.000237087	Annotation Cluster 2	Enrichment Score: 4.232249711865546
GOTERM_BP_FAT	GO:0006350~transcription	52	0.000892828	FOXA2, POU6F2, RBM15B, RBM4, PAX6, CBX8, GLI3, PTMA, CBFB, HOXD11, FUBP1, MLL5, NR2F6, ATOH7, NR2F2, MYC, ELP3, RBBP4, ZNF544, GTF2H4, ZNF684, MCM6, MYT1L, BAZ1B, FOXC1, CAMTA1, HOXA13, GLIS1, CTNND2, SOX4, PRDM16, ZNF331, ZNF174, ZNF30, NPAS1, NPAS3, BCL11A, GBX2, LHX5, MAML3, APEX1, NFATC1, FOXD3, INSM1, CEBPA, TBX5, FOXA1, AFF4, TRIM24, NR4A3, NOTCH1, ZNF319	0.792757	0.0634737	1.50163	SP_PIR_KEYWORDS	Transcription	46	7.90764e-16	SOX21, HELT, SOX1, CDX4, PRDM16, SOX9, ATF1, WT1, TCF21, PRDM15, LHX1, LHX2, PAX7, GATA4, FOXB2, OLIG2, ALX4, FOXD2, SIM1, ZNF423, NKX2-3, FOXD3, PHOX2A, FOXL2, TBX15, EPAS1, LMX1B, TBX3, BARHL2, ZNF501, ZNF790, NR4A2, LMX1A, MXD1, PROX1, TBR1, FEZF1, FEZF2, MSX1, HOXC11, HOXD3, EBF2, EBF1, TFAP2A, NR5A2, LBX2	1.32117e-13	2.64233e-14	9.4369e-13	GOTERM_BP_FAT	GO:0051173~positive regulation of nitrogen compound metabolic process	30	2.19859e-06	ABLIM2, RSF1, CDX2, FOXK1, BLM, ONECUT2, PRDM16, HNRPLL, ATOH1, FOXF1, PAX8, POU3F2, NR2F2, INSR, NKX2-2, FOXD3, EGR2, MAFB, GRIN1, TAF7, NR4A2, NEUROG2, TBR1, EBF3, JUN, EBF1, FOXE1, VGLL2, JAK2, SMARCA2	0.00402191	0.000671445	0.00374153	Category	Term	Count	PValue	Genes	Bonferroni	Benjamini	FDR
GOTERM_BP_FAT	GO:0006357~regulation of transcription from RNA polymerase II promoter	25	0.00112628	FOXA2, HOXA13, GLIS1, RBM4, PAX6, PRDM16, GDNF, CBFB, ZNF174, NPAS1, POU3F3, MAML3, NR2F2, MYC, FOXD3, CEBPA, ELP3, TBX5, FOXA1, NR4A3, FOSB, DLX2, NOTCH1, BCL6B, FOXC1	0.862705	0.0763527	1.89076	SP_PIR_KEYWORDS	nucleus	60	3.17067e-12	SOX21, HELT, EVX2, CDX4, ZIC2, PAX7, GATA4, FOXB2, OLIG2, ALX4, PITX2, PHOX2A, TBX15, GSC, EMX1, BARHL2, ZNF501, ZNF790, MXD1, PROX1, TBR1, SIX6, MSX1, HOXC11, HOXD3, TFAP2A, LBX2, EPN1, IRX6, SOX1, IRX1, PRDM16, SOX9, LIN28B, WT1, ATF1, TCF21, PRDM15, LHX1, LHX2, FOXD2, NKX2-5, SIM1, NKX2-2, ZNF423, NKX2-3, FOXD3, FOXL2, EPAS1, LMX1B, TBX3, NR4A2, LMX1A, FEZF1, FEZF2, DLX2, ISL2, EBF2, EBF1, NR5…	5.39017e-10	8.98361e-11	3.86818e-09	GOTERM_BP_FAT	GO:0010628~positive regulation of gene expression	28	2.83212e-06	ABLIM2, CDX2, RSF1, FOXK1, BLM, ONECUT2, PRDM16, ATOH1, FOXF1, PAX8, POU3F2, NR2F2, NKX2-2, FOXD3, EGR2, MAFB, GRIN1, TAF7, NR4A2, NEUROG2, TBR1, CDH13, EBF3, JUN, EBF1, FOXE1, VGLL2, SMARCA2	0.00517783	0.000741337	0.00481963	GOTERM_BP_FAT	GO:0006357~regulation of transcription from RNA polymerase II promoter	16	5.10765e-07	LBX1, CDX4, ONECUT2, BARHL2, NR4A2, SIX2, PAX3, VAX1, PRDM16, WT1, MEIS2, PAX9, HAND2, NKX2-2, FOXD3, TWIST1	0.000259946	6.49928e-05	0.000737365
GOTERM_MF_FAT	GO:0003677~DNA binding	57	0.00216021	FOXA2, POU6F2, PAX6, GLI3, CBFB, HOXD11, FUBP1, HIST2H2AC, NR2F6, NR2F2, ATOH7, MYC, ELP3, ZNF544, GTF2H4, ZNF684, FOSB, MCM6, MYT1L, BAZ1B, FOXC1, EP400, HIST1H2AB, IRX3, HOXA13, GLIS1, IRX1, SOX4, WBP11, PRDM16, ZNF331, ZNF174, ZFP36L1, ZNF30, NPAS1, MEIS3, NPAS3, GBX2, LHX5, POU3F3, TLX3, APEX1, NFATC1, FOXD3, INSM1, CEBPA, SHPRH, TBX5, FOXA1, AFF4, TRIM24, NR4A3, DLX2, NOTCH1, ZBED5, BCL6B, Z…	0.570681	0.19054	2.9616	GOTERM_BP_FAT	GO:0006350~transcription	46	5.37757e-12	SOX21, HELT, SOX1, CDX4, PRDM16, SOX9, ATF1, WT1, TCF21, PRDM15, LHX1, LHX2, PAX7, GATA4, FOXB2, OLIG2, ALX4, FOXD2, SIM1, ZNF423, NKX2-3, FOXD3, PHOX2A, FOXL2, TBX15, EPAS1, LMX1B, TBX3, BARHL2, ZNF501, ZNF790, NR4A2, LMX1A, MXD1, PROX1, TBR1, FEZF1, FEZF2, MSX1, HOXC11, HOXD3, EBF2, EBF1, TFAP2A, NR5A2, LBX2	5.53354e-09	1.38338e-09	8.52739e-09	GOTERM_BP_FAT	GO:0045935~positive regulation of nucleobase, nucleoside, nucleotide and nucleic acid metabolic process	29	4.09158e-06	ABLIM2, CDX2, RSF1, FOXK1, BLM, ONECUT2, PRDM16, HNRPLL, ATOH1, FOXF1, PAX8, POU3F2, NR2F2, INSR, NKX2-2, FOXD3, EGR2, MAFB, GRIN1, TAF7, NR4A2, NEUROG2, TBR1, EBF3, JUN, EBF1, FOXE1, VGLL2, SMARCA2	0.00747182	0.000937045	0.00696287	GOTERM_BP_FAT	GO:0010557~positive regulation of macromolecule biosynthetic process	13	1.69927e-05	ONECUT2, BARHL2, NR4A2, SIX2, PAX3, PRDM16, WT1, MEIS2, PAX9, HAND2, EBF2, NKX2-2, FOXD3	0.00861207	0.00144052	0.0245288
GOTERM_MF_FAT	GO:0016563~transcription activator activity	17	0.00269879	FOXA2, TBX5, RBM4, TRIM24, NR4A3, PRDM16, CBFB, MYT1L, MLL5, NOTCH1, BCL2, POU3F3, FOXC1, MAML3, APEX1, ING1, NFATC1	0.652383	0.190494	3.6872									GOTERM_BP_FAT	GO:0031328~positive regulation of cellular biosynthetic process	30	4.63609e-06	ABLIM2, RSF1, CDX2, FOXK1, BLM, ONECUT2, PRDM16, ATOH1, FOXF1, PAX8, POU3F2, NR2F2, INSR, NKX2-2, FOXD3, EGR2, MAFB, GRIN1, BARHL2, TAF7, NR4A2, NEUROG2, TBR1, EBF3, JUN, EBF1, FOXE1, VGLL2, JAK2, SMARCA2	0.00846197	0.000943774	0.00788947	GOTERM_BP_FAT	GO:0031328~positive regulation of cellular biosynthetic process	13	2.56428e-05	ONECUT2, BARHL2, NR4A2, SIX2, PAX3, PRDM16, WT1, MEIS2, PAX9, HAND2, EBF2, NKX2-2, FOXD3	0.0129675	0.00186288	0.0370129
GOTERM_MF_FAT	GO:0003702~RNA polymerase II transcription factor activity	10	0.0381776	CEBPA, FOXA2, TBX5, GLIS1, RBM4, GTF2H4, POU3F3, FOXC1, NR2F2, CBFB	1	0.815682	41.7913	Annotation Cluster 3	Enrichment Score: 7.711083084720201							GOTERM_BP_FAT	GO:0009891~positive regulation of biosynthetic process	30	5.82551e-06	ABLIM2, RSF1, CDX2, FOXK1, BLM, ONECUT2, PRDM16, ATOH1, FOXF1, PAX8, POU3F2, NR2F2, INSR, NKX2-2, FOXD3, EGR2, MAFB, GRIN1, BARHL2, TAF7, NR4A2, NEUROG2, TBR1, EBF3, JUN, EBF1, FOXE1, VGLL2, JAK2, SMARCA2	0.0106214	0.00106725	0.00991346	GOTERM_BP_FAT	GO:0009891~positive regulation of biosynthetic process	13	2.88012e-05	ONECUT2, BARHL2, NR4A2, SIX2, PAX3, PRDM16, WT1, MEIS2, PAX9, HAND2, EBF2, NKX2-2, FOXD3	0.0145531	0.00183083	0.041571
SP_PIR_KEYWORDS	activator	12	0.18615	CEBPA, CAMTA1, NOTCH1, FOXA2, FOXA1, GLIS1, SOX4, MAML3, PRDM16, MYC, FOXD3, NFATC1	1	0.818048	93.3656	Category	Term	Count	PValue	Genes	Bonferroni	Benjamini	FDR	GOTERM_BP_FAT	GO:0045941~positive regulation of transcription	27	5.90388e-06	ABLIM2, CDX2, RSF1, FOXK1, BLM, ONECUT2, PRDM16, ATOH1, FOXF1, PAX8, POU3F2, NR2F2, NKX2-2, FOXD3, EGR2, MAFB, GRIN1, TAF7, NR4A2, NEUROG2, TBR1, EBF3, JUN, EBF1, FOXE1, VGLL2, SMARCA2	0.0107635	0.000983321	0.0100468	GOTERM_BP_FAT	GO:0045941~positive regulation of transcription	12	2.97486e-05	MEIS2, PAX9, HAND2, EBF2, ONECUT2, NR4A2, SIX2, PAX3, PRDM16, NKX2-2, WT1, FOXD3	0.0150282	0.00168106	0.0429381
								GOTERM_BP_FAT	GO:0006357~regulation of transcription from RNA polymerase II promoter	26	1.00551e-10	SOX21, HELT, CDX4, SOX9, PRDM16, WT1, GATA4, OLIG2, ALX4, NKX2-5, NKX2-2, FOXD3, NKX2-3, FOXL2, GSC, TBX3, LMX1B, EPAS1, BARHL2, NR4A2, TBR1, PROX1, DLX2, MSX1, TFAP2A, NR5A2	1.03467e-07	1.72444e-08	1.59446e-07	GOTERM_BP_FAT	GO:0010557~positive regulation of macromolecule biosynthetic process	29	6.13592e-06	ABLIM2, RSF1, CDX2, FOXK1, BLM, ONECUT2, PRDM16, ATOH1, FOXF1, PAX8, POU3F2, NR2F2, INSR, NKX2-2, FOXD3, EGR2, MAFB, GRIN1, BARHL2, TAF7, NR4A2, NEUROG2, TBR1, EBF3, JUN, EBF1, FOXE1, VGLL2, SMARCA2	0.0111842	0.000936826	0.0104417	GOTERM_BP_FAT	GO:0010628~positive regulation of gene expression	12	3.62823e-05	MEIS2, PAX9, HAND2, EBF2, ONECUT2, NR4A2, SIX2, PAX3, PRDM16, NKX2-2, WT1, FOXD3	0.0182986	0.0018451	0.0523664
Annotation Cluster 2	Enrichment Score: 2.8688946701795945							GOTERM_BP_FAT	GO:0045941~positive regulation of transcription	22	1.00001e-09	FOXL2, TBX3, LMX1B, EPAS1, NR4A2, SOX9, PRDM16, TBR1, PROX1, WT1, DLX2, TCF21, EBF2, EBF1, GATA4, NR5A2, ALX4, NKX2-5, NKX2-2, FOXD3, NKX2-3, ZNF423	1.02901e-06	1.47001e-07	1.58574e-06	GOTERM_BP_FAT	GO:0051254~positive regulation of RNA metabolic process	24	1.33739e-05	ABLIM2, EGR2, CDX2, FOXK1, MAFB, GRIN1, ONECUT2, TAF7, NR4A2, NEUROG2, PRDM16, TBR1, HNRPLL, ATOH1, JUN, FOXF1, PAX8, FOXE1, VGLL2, POU3F2, NR2F2, SMARCA2, NKX2-2, FOXD3	0.0242164	0.00188395	0.0227574	GOTERM_BP_FAT	GO:0045944~positive regulation of transcription from RNA polymerase II promoter	10	3.64589e-05	MEIS2, PAX9, HAND2, ONECUT2, NR4A2, SIX2, PAX3, NKX2-2, WT1, FOXD3	0.0183868	0.00168566	0.0526211
Category	Term	Count	PValue	Genes	Bonferroni	Benjamini	FDR	GOTERM_BP_FAT	GO:0010628~positive regulation of gene expression	22	1.70584e-09	FOXL2, TBX3, LMX1B, EPAS1, NR4A2, SOX9, PRDM16, TBR1, PROX1, WT1, DLX2, TCF21, EBF2, EBF1, GATA4, NR5A2, ALX4, NKX2-5, NKX2-2, FOXD3, NKX2-3, ZNF423	1.75531e-06	2.19413e-07	2.70499e-06	GOTERM_BP_FAT	GO:0045893~positive regulation of transcription, DNA-dependent	23	3.57058e-05	ABLIM2, EGR2, CDX2, FOXK1, MAFB, GRIN1, ONECUT2, TAF7, NR4A2, NEUROG2, PRDM16, TBR1, ATOH1, JUN, FOXF1, PAX8, FOXE1, VGLL2, POU3F2, NR2F2, SMARCA2, NKX2-2, FOXD3	0.063354	0.00466408	0.0607472	GOTERM_BP_FAT	GO:0045893~positive regulation of transcription, DNA-dependent	11	4.17224e-05	MEIS2, PAX9, HAND2, ONECUT2, NR4A2, SIX2, PAX3, PRDM16, NKX2-2, WT1, FOXD3	0.0210132	0.0017682	0.0602158
GOTERM_MF_FAT	GO:0043565~sequence-specific DNA binding	28	5.91582e-06	IRX3, HOXA13, FOXA2, POU6F2, IRX1, PAX6, PRDM16, GLI3, HOXD11, MEIS3, GBX2, NR2F6, LHX5, POU3F3, TLX3, NR2F2, MYC, NFATC1, FOXD3, CEBPA, TBX5, FOXA1, TRIM24, NR4A3, FOSB, DLX2, NOTCH1, FOXC1	0.00231042	0.00115588	0.00822378	GOTERM_BP_FAT	GO:0010557~positive regulation of macromolecule biosynthetic process	23	2.48958e-09	FOXL2, TBX3, LMX1B, EPAS1, BARHL2, NR4A2, SOX9, PRDM16, TBR1, PROX1, WT1, DLX2, TCF21, EBF2, EBF1, GATA4, NR5A2, ALX4, NKX2-5, NKX2-2, FOXD3, ZNF423, NKX2-3	2.56178e-06	2.84642e-07	3.9478e-06	GOTERM_BP_FAT	GO:0006357~regulation of transcription from RNA polymerase II promoter	29	0.000110088	ABLIM2, CDX2, FOXK1, ONECUT2, PRDM16, KCNIP3, ATOH1, PAX8, POU3F2, NR2F2, BCOR, NKX2-2, FOXD3, EGR2, LBX1, SMAD7, MAFB, GRIN1, BARHL2, TAF7, NR4A2, NEUROG2, TBR1, DLX1, ID2, JUN, FOXE1, VGLL2, SMARCA2	0.182744	0.0125334	0.187184	GOTERM_BP_FAT	GO:0051254~positive regulation of RNA metabolic process	11	4.5134e-05	MEIS2, PAX9, HAND2, ONECUT2, NR4A2, SIX2, PAX3, PRDM16, NKX2-2, WT1, FOXD3	0.0227119	0.00176565	0.0651381
SP_PIR_KEYWORDS	Homeobox	12	0.000788746	DLX2, IRX3, MEIS3, HOXA13, POU6F2, IRX1, PAX6, GBX2, LHX5, POU3F3, TLX3, HOXD11	0.193791	0.0303045	1.03386	GOTERM_BP_FAT	GO:0031328~positive regulation of cellular biosynthetic process	23	5.83758e-09	FOXL2, TBX3, LMX1B, EPAS1, BARHL2, NR4A2, SOX9, PRDM16, TBR1, PROX1, WT1, DLX2, TCF21, EBF2, EBF1, GATA4, NR5A2, ALX4, NKX2-5, NKX2-2, FOXD3, ZNF423, NKX2-3	6.00685e-06	6.00687e-07	9.25681e-06	GOTERM_BP_FAT	GO:0045944~positive regulation of transcription from RNA polymerase II promoter	17	0.000967076	ABLIM2, EGR2, MAFB, ONECUT2, TAF7, GRIN1, NR4A2, NEUROG2, TBR1, ATOH1, JUN, PAX8, VGLL2, POU3F2, SMARCA2, NKX2-2, FOXD3	0.830264	0.0635747	1.6331	GOTERM_BP_FAT	GO:0045935~positive regulation of nucleobase, nucleoside, nucleotide and nucleic acid metabolic process	12	7.40016e-05	MEIS2, PAX9, HAND2, EBF2, ONECUT2, NR4A2, SIX2, PAX3, PRDM16, NKX2-2, WT1, FOXD3	0.0369676	0.00268697	0.10678
INTERPRO	IPR017970:Homeobox, conserved site	12	0.0010492	DLX2, IRX3, MEIS3, HOXA13, POU6F2, IRX1, PAX6, GBX2, LHX5, POU3F3, TLX3, HOXD11	0.409612	0.409612	1.50115	GOTERM_BP_FAT	GO:0045935~positive regulation of nucleobase, nucleoside, nucleotide and nucleic acid metabolic process	22	6.07207e-09	FOXL2, TBX3, LMX1B, EPAS1, NR4A2, SOX9, PRDM16, TBR1, PROX1, WT1, DLX2, TCF21, EBF2, EBF1, GATA4, NR5A2, ALX4, NKX2-5, NKX2-2, FOXD3, NKX2-3, ZNF423	6.24814e-06	5.68014e-07	9.62864e-06	SP_PIR_KEYWORDS	activator	18	0.00319963	EGR2, CDX2, FOXK1, MAFB, ONECUT2, NFIX, NEUROG2, CDC5L, PRDM16, ATOH1, EBF3, FOXF1, EBF1, POU3F2, TFAP2D, NFIL3, SMARCA2, FOXD3	0.639086	0.119609	4.22856	GOTERM_BP_FAT	GO:0051173~positive regulation of nitrogen compound metabolic process	12	9.24792e-05	MEIS2, PAX9, HAND2, EBF2, ONECUT2, NR4A2, SIX2, PAX3, PRDM16, NKX2-2, WT1, FOXD3	0.0459833	0.00313335	0.133425
INTERPRO	IPR001356:Homeobox	11	0.00338396	DLX2, IRX3, MEIS3, HOXA13, POU6F2, IRX1, PAX6, GBX2, POU3F3, TLX3, HOXD11	0.817614	0.572933	4.7667	GOTERM_BP_FAT	GO:0009891~positive regulation of biosynthetic process	23	7.60663e-09	FOXL2, TBX3, LMX1B, EPAS1, BARHL2, NR4A2, SOX9, PRDM16, TBR1, PROX1, WT1, DLX2, TCF21, EBF2, EBF1, GATA4, NR5A2, ALX4, NKX2-5, NKX2-2, FOXD3, ZNF423, NKX2-3	7.82719e-06	6.52268e-07	1.2062e-05									GOTERM_BP_FAT	GO:0010604~positive regulation of macromolecule metabolic process	13	0.000242194	ONECUT2, BARHL2, NR4A2, SIX2, PAX3, PRDM16, WT1, MEIS2, PAX9, HAND2, EBF2, NKX2-2, FOXD3	0.115994	0.00682614	0.349076
INTERPRO	IPR012287:Homeodomain-related	11	0.00464881	DLX2, IRX3, MEIS3, HOXA13, POU6F2, IRX1, PAX6, GBX2, POU3F3, TLX3, HOXD11	0.90359	0.541463	6.49343	GOTERM_BP_FAT	GO:0051173~positive regulation of nitrogen compound metabolic process	22	1.05695e-08	FOXL2, TBX3, LMX1B, EPAS1, NR4A2, SOX9, PRDM16, TBR1, PROX1, WT1, DLX2, TCF21, EBF2, EBF1, GATA4, NR5A2, ALX4, NKX2-5, NKX2-2, FOXD3, NKX2-3, ZNF423	1.0876e-05	7.7686e-07	1.67604e-05	Annotation Cluster 3	Enrichment Score: 3.697147242727795							GOTERM_MF_FAT	GO:0016563~transcription activator activity	5	0.121508	HAND2, NR4A2, PAX3, PRDM16, WT1	1	0.878736	77.0833
UP_SEQ_FEATURE	DNA-binding region:Homeobox	9	0.00837439	DLX2, HOXA13, POU6F2, PAX6, GBX2, LHX5, POU3F3, TLX3, HOXD11	0.999479	0.919548	12.284	GOTERM_BP_FAT	GO:0045893~positive regulation of transcription, DNA-dependent	19	1.51103e-08	FOXL2, TBX3, LMX1B, EPAS1, NR4A2, SOX9, PRDM16, TBR1, PROX1, WT1, DLX2, TCF21, GATA4, NR5A2, ALX4, NKX2-5, NKX2-2, FOXD3, NKX2-3	1.55483e-05	1.03656e-06	2.39608e-05	Category	Term	Count	PValue	Genes	Bonferroni	Benjamini	FDR
SMART	SM00389:HOX	11	0.0128294	DLX2, IRX3, MEIS3, HOXA13, POU6F2, IRX1, PAX6, GBX2, POU3F3, TLX3, HOXD11	0.808485	0.808485	13.9254	GOTERM_BP_FAT	GO:0051254~positive regulation of RNA metabolic process	19	1.71882e-08	FOXL2, TBX3, LMX1B, EPAS1, NR4A2, SOX9, PRDM16, TBR1, PROX1, WT1, DLX2, TCF21, GATA4, NR5A2, ALX4, NKX2-5, NKX2-2, FOXD3, NKX2-3	1.76865e-05	1.10542e-06	2.72558e-05	GOTERM_MF_FAT	GO:0043565~sequence-specific DNA binding	35	3.6231e-10	CDX2, FOXK1, EVX2, HOXA11, ONECUT2, NFIX, PRDM16, OTP, ARX, ATOH1, HOXA3, FOXF1, LHX2, PAX8, POU3F2, NR2F2, NFIL3, LHX9, NKX2-2, FOXD3, ERG, LBX1, SMAD7, MAFB, TAF7, EMX2, BARHL2, NR4A2, NEUROG2, SIX6, ISL2, DLX1, ATF3, JUN, FOXE1	1.46373e-07	1.46373e-07	5.06084e-07	Annotation Cluster 3	Enrichment Score: 2.3467297270336887
								GOTERM_BP_FAT	GO:0010604~positive regulation of macromolecule metabolic process	23	3.11251e-07	FOXL2, TBX3, LMX1B, EPAS1, BARHL2, NR4A2, SOX9, PRDM16, TBR1, PROX1, WT1, DLX2, TCF21, EBF2, EBF1, GATA4, NR5A2, ALX4, NKX2-5, NKX2-2, FOXD3, ZNF423, NKX2-3	0.000320226	1.3925e-05	0.000493557	UP_SEQ_FEATURE	DNA-binding region:Homeobox	17	3.029e-08	CDX2, LBX1, EVX2, HOXA11, ONECUT2, BARHL2, EMX2, SIX6, OTP, ARX, DLX1, ISL2, HOXA3, LHX2, POU3F2, LHX9, NKX2-2	2.55038e-05	2.55038e-05	4.68077e-05	Category	Term	Count	PValue	Genes	Bonferroni	Benjamini	FDR
Annotation Cluster 3	Enrichment Score: 2.2291640285124377							GOTERM_BP_FAT	GO:0045944~positive regulation of transcription from RNA polymerase II promoter	15	7.10293e-07	FOXL2, LMX1B, EPAS1, NR4A2, SOX9, TBR1, WT1, DLX2, GATA4, ALX4, NR5A2, NKX2-5, NKX2-2, FOXD3, NKX2-3	0.000730624	2.92352e-05	0.00112632	GOTERM_MF_FAT	GO:0003700~transcription factor activity	41	6.6396e-08	CDX2, FOXK1, EVX2, HOXA11, ONECUT2, NFIX, OTP, ARX, ATOH1, HOXA3, FOXF1, LHX2, PAX8, POU3F2, NR2F2, NFIL3, LHX9, SIM1, NKX2-2, FOXD3, ERG, LBX1, EGR2, SMAD7, MAFB, DMRT3, TAF7, EMX2, L3MBTL, BARHL2, NR4A2, SIX6, TBR1, ZFP37, ISL2, DLX1, ATF3, JUN, EBF1, FOXE1, TFAP2D	2.68236e-05	1.34119e-05	9.27436e-05	GOTERM_BP_FAT	GO:0006357~regulation of transcription from RNA polymerase II promoter	16	5.10765e-07	LBX1, CDX4, ONECUT2, BARHL2, NR4A2, SIX2, PAX3, VAX1, PRDM16, WT1, MEIS2, PAX9, HAND2, NKX2-2, FOXD3, TWIST1	0.000259946	6.49928e-05	0.000737365
Category	Term	Count	PValue	Genes	Bonferroni	Benjamini	FDR	GOTERM_MF_FAT	GO:0016563~transcription activator activity	11	0.00081583	EPAS1, GATA4, NR4A2, TFAP2A, SOX9, NR5A2, PRDM16, NKX2-5, WT1, ZNF423, NKX2-3	0.10579	0.0184632	0.954745	SP_PIR_KEYWORDS	Homeobox	17	4.48857e-07	CDX2, LBX1, EVX2, HOXA11, ONECUT2, BARHL2, EMX2, SIX6, OTP, ARX, DLX1, ISL2, HOXA3, LHX2, POU3F2, LHX9, NKX2-2	0.000142726	2.37892e-05	0.000605135	GOTERM_BP_FAT	GO:0000122~negative regulation of transcription from RNA polymerase II promoter	8	0.000203522	MEIS2, CDX4, VAX1, PAX3, PRDM16, WT1, FOXD3, TWIST1	0.098417	0.00607577	0.293413
GOTERM_BP_FAT	GO:0006928~cell motion	18	0.00125408	ICAM1, SLC22A16, TUBB2C, DPYSL5, PAX6, ITGA2, RPL24, GDNF, CD2AP, SEMA6C, GAB2, GBX2, ADRA2A, POU3F3, FOXC1, TLX3, NR2F2, FN1	0.890418	0.0815259	2.10317									INTERPRO	IPR001356:Homeobox	17	5.22461e-07	CDX2, LBX1, EVX2, HOXA11, ONECUT2, BARHL2, EMX2, SIX6, OTP, ARX, DLX1, ISL2, HOXA3, LHX2, POU3F2, LHX9, NKX2-2	0.000270598	0.000270598	0.000756104	GOTERM_BP_FAT	GO:0045892~negative regulation of transcription, DNA-dependent	8	0.00113339	MEIS2, CDX4, VAX1, PAX3, PRDM16, WT1, FOXD3, TWIST1	0.438545	0.0258963	1.62383
GOTERM_BP_FAT	GO:0051674~localization of cell	12	0.00885263	ICAM1, SLC22A16, GAB2, PAX6, GBX2, POU3F3, FOXC1, TLX3, NR2F2, CD2AP, GDNF, FN1	1	0.251844	13.9826	Annotation Cluster 4	Enrichment Score: 6.2168216481730685							INTERPRO	IPR017970:Homeobox, conserved site	17	5.59354e-07	CDX2, LBX1, EVX2, HOXA11, ONECUT2, BARHL2, EMX2, SIX6, OTP, ARX, DLX1, ISL2, HOXA3, LHX2, POU3F2, LHX9, NKX2-2	0.000289703	0.000144862	0.000809495	GOTERM_BP_FAT	GO:0051253~negative regulation of RNA metabolic process	8	0.00123713	MEIS2, CDX4, VAX1, PAX3, PRDM16, WT1, FOXD3, TWIST1	0.467457	0.0270234	1.77123
GOTERM_BP_FAT	GO:0048870~cell motility	12	0.00885263	ICAM1, SLC22A16, GAB2, PAX6, GBX2, POU3F3, FOXC1, TLX3, NR2F2, CD2AP, GDNF, FN1	1	0.251844	13.9826	Category	Term	Count	PValue	Genes	Bonferroni	Benjamini	FDR	INTERPRO	IPR012287:Homeodomain-related	17	9.56716e-07	CDX2, LBX1, EVX2, HOXA11, ONECUT2, BARHL2, EMX2, CDC5L, SIX6, OTP, ARX, DLX1, HOXA3, LHX2, POU3F2, LHX9, NKX2-2	0.000495456	0.000165179	0.00138455	GOTERM_BP_FAT	GO:0010629~negative regulation of gene expression	9	0.00193149	MEIS2, CDX4, VAX1, PAX3, PRDM16, LIN28B, WT1, FOXD3, TWIST1	0.626217	0.0385985	2.75251
GOTERM_BP_FAT	GO:0016477~cell migration	11	0.0123275	ICAM1, GAB2, PAX6, GBX2, POU3F3, FOXC1, TLX3, NR2F2, CD2AP, GDNF, FN1	1	0.274875	18.9505	GOTERM_BP_FAT	GO:0048598~embryonic morphogenesis	16	9.13931e-09	FOXL2, TBX15, GSC, TBX3, PROX1, ZIC2, TCF21, DLX2, MSX1, HOXC11, LHX1, HOXD3, GATA4, TFAP2A, ALX4, WNT7A	9.40431e-06	7.23411e-07	1.44925e-05	SMART	SM00389:HOX	17	5.4533e-06	CDX2, LBX1, EVX2, HOXA11, ONECUT2, BARHL2, EMX2, SIX6, OTP, ARX, DLX1, ISL2, HOXA3, LHX2, POU3F2, LHX9, NKX2-2	0.00069778	0.00069778	0.00633291	GOTERM_BP_FAT	GO:0045934~negative regulation of nucleobase, nucleoside, nucleotide and nucleic acid metabolic process	9	0.00209349	HTR1B, MEIS2, CDX4, VAX1, PAX3, PRDM16, WT1, FOXD3, TWIST1	0.655859	0.0401968	2.98013
								GOTERM_BP_FAT	GO:0003002~regionalization	13	2.79526e-08	GSC, EMX1, LMX1B, TBX3, DLX2, HOXC11, LHX1, HOXD3, LHX2, PAX7, GATA4, ALX4, WNT7A	2.87628e-05	1.59795e-06	4.43252e-05	GOTERM_BP_FAT	GO:0030182~neuron differentiation	20	0.000425764	EGR2, LBX1, ONECUT2, BARHL2, EMX2, NR4A2, NEUROG2, TBR1, OTP, ARX, SEMA5A, FEZF2, ATOH1, DLX1, ISL2, LHX2, POU3F2, JAK2, SLITRK5, NKX2-2	0.541865	0.0320014	0.722106	GOTERM_BP_FAT	GO:0051172~negative regulation of nitrogen compound metabolic process	9	0.00220734	HTR1B, MEIS2, CDX4, VAX1, PAX3, PRDM16, WT1, FOXD3, TWIST1	0.675276	0.0408027	3.13981
Annotation Cluster 4	Enrichment Score: 2.043696059448853							GOTERM_BP_FAT	GO:0007389~pattern specification process	14	1.00818e-07	GSC, EMX1, LMX1B, TBX3, DLX2, HOXC11, LHX1, PAX7, HOXD3, LHX2, GATA4, ALX4, WNT7A, PITX2	0.000103736	4.94007e-06	0.00015987	GOTERM_BP_FAT	GO:0045165~cell fate commitment	10	0.00102123	ISL2, DLX1, ATOH1, LBX1, HOXA11, BARHL2, ONECUT2, NEUROG2, NR2F2, NKX2-2	0.846317	0.0625404	1.7238	GOTERM_BP_FAT	GO:0031327~negative regulation of cellular biosynthetic process	9	0.0035096	HTR1B, MEIS2, CDX4, VAX1, PAX3, PRDM16, WT1, FOXD3, TWIST1	0.832961	0.0543879	4.94891
Category	Term	Count	PValue	Genes	Bonferroni	Benjamini	FDR	GOTERM_BP_FAT	GO:0001501~skeletal system development	14	7.7562e-07	GSC, TBX15, TBX3, SOX9, COL9A1, DLX2, COL9A2, MSX1, HOXC11, HOXD3, PAX7, TFAP2A, ALX4, WNT7A	0.000797795	3.06962e-05	0.00122991	GOTERM_BP_FAT	GO:0051960~regulation of nervous system development	11	0.00232869	TF, ISL2, DLX1, ATOH1, LBX1, BARHL2, GRIN1, POU3F2, GHSR, NKX2-2, OTP	0.986067	0.0989829	3.88994	GOTERM_BP_FAT	GO:0009890~negative regulation of biosynthetic process	9	0.00404089	HTR1B, MEIS2, CDX4, VAX1, PAX3, PRDM16, WT1, FOXD3, TWIST1	0.872671	0.057185	5.6779
GOTERM_BP_FAT	GO:0001763~morphogenesis of a branching structure	10	2.47914e-06	SPRY2, DLX2, NOTCH1, FOXA2, BCL2, FOXA1, CTNND2, GBX2, GLI3, HOXD11	0.00435871	0.00435871	0.00419927	GOTERM_BP_FAT	GO:0009952~anterior/posterior pattern formation	6	0.00412448	HOXC11, TBX3, LHX1, HOXD3, GATA4, ALX4	0.985777	0.0471788	6.34368	GOTERM_BP_FAT	GO:0060284~regulation of cell development	11	0.00387684	ISL2, DLX1, ATOH1, LBX1, SMAD7, HOXA11, BARHL2, GRIN1, POU3F2, NKX2-2, OTP	0.999191	0.135243	6.39672	GOTERM_BP_FAT	GO:0016481~negative regulation of transcription	8	0.00461461	MEIS2, CDX4, VAX1, PAX3, PRDM16, WT1, FOXD3, TWIST1	0.905037	0.063304	6.45926
GOTERM_BP_FAT	GO:0045165~cell fate commitment	13	4.28935e-06	FOXA2, POU6F2, FOXA1, PAX6, GDNF, GLI3, HOXD11, SPRY2, DLX2, NOTCH1, BCL2, NR2F2, TLX3	0.00752936	0.0037718	0.0072654									GOTERM_BP_FAT	GO:0048663~neuron fate commitment	5	0.00897062	ISL2, DLX1, ATOH1, LBX1, NKX2-2	1	0.244182	14.2172	GOTERM_BP_FAT	GO:0010558~negative regulation of macromolecule biosynthetic process	8	0.0118148	MEIS2, CDX4, VAX1, PAX3, PRDM16, WT1, FOXD3, TWIST1	0.997641	0.120775	15.7668
GOTERM_BP_FAT	GO:0035295~tube development	14	5.47036e-05	CEBPA, SHROOM3, FOXA2, TBX5, FOXA1, NR4A3, GDNF, GLI3, HOXD11, SPRY2, NOTCH1, BCL2, GBX2, FOXC1	0.0918906	0.00872449	0.092621	Annotation Cluster 5	Enrichment Score: 5.469214874472446							GOTERM_BP_FAT	GO:0050767~regulation of neurogenesis	9	0.0112534	ISL2, DLX1, ATOH1, LBX1, BARHL2, GRIN1, POU3F2, NKX2-2, OTP	1	0.269707	17.5186	GOTERM_BP_FAT	GO:0010605~negative regulation of macromolecule metabolic process	9	0.0170331	MEIS2, CDX4, VAX1, PAX3, PRDM16, LIN28B, WT1, FOXD3, TWIST1	0.999841	0.160451	21.9654
GOTERM_BP_FAT	GO:0048754~branching morphogenesis of a tube	8	7.42172e-05	SPRY2, NOTCH1, FOXA2, BCL2, FOXA1, GBX2, GLI3, HOXD11	0.122585	0.0108388	0.125641	Category	Term	Count	PValue	Genes	Bonferroni	Benjamini	FDR	GOTERM_BP_FAT	GO:0048665~neuron fate specification	3	0.0339583	ATOH1, LBX1, NKX2-2	1	0.513065	44.4534	GOTERM_BP_FAT	GO:0001654~eye development	3	0.103645	MEIS2, VAX1, WT1	1	0.575497	79.3949
GOTERM_BP_FAT	GO:0048663~neuron fate commitment	7	0.000104175	DLX2, NOTCH1, FOXA2, FOXA1, PAX6, TLX3, GLI3	0.167703	0.0121632	0.176314	GOTERM_BP_FAT	GO:0048598~embryonic morphogenesis	16	9.13931e-09	FOXL2, TBX15, GSC, TBX3, PROX1, ZIC2, TCF21, DLX2, MSX1, HOXC11, LHX1, HOXD3, GATA4, TFAP2A, ALX4, WNT7A	9.40431e-06	7.23411e-07	1.44925e-05	GOTERM_BP_FAT	GO:0045664~regulation of neuron differentiation	7	0.0350572	ISL2, ATOH1, LBX1, BARHL2, GRIN1, POU3F2, NKX2-2	1	0.520486	45.519	GOTERM_MF_FAT	GO:0043566~structure-specific DNA binding	3	0.143686	VAX1, WT1, FOXD3	1	0.890347	82.8659
GOTERM_BP_FAT	GO:0001708~cell fate specification	7	0.000222541	NOTCH1, FOXA2, FOXA1, TLX3, GDNF, GLI3, HOXD11	0.324405	0.0204285	0.376291	GOTERM_BP_FAT	GO:0043009~chordate embryonic development	16	2.50285e-08	TBX15, GSC, LMX1B, EPAS1, TBX3, PROX1, ZIC2, DLX2, MSX1, HOXD3, PAX7, GATA4, TFAP2A, ALX4, NKX2-5, FOXD3	2.5754e-05	1.51496e-06	3.96883e-05	GOTERM_BP_FAT	GO:0001708~cell fate specification	4	0.0675263	ATOH1, LBX1, HOXA11, NKX2-2	1	0.678287	69.5721	SP_PIR_KEYWORDS	chromosomal rearrangement	3	0.258855	PAX3, PRDM16, WT1	1	0.844393	96.7557
GOTERM_BP_FAT	GO:0035239~tube morphogenesis	10	0.000265737	SPRY2, NOTCH1, SHROOM3, FOXA2, BCL2, FOXA1, GBX2, NR4A3, GLI3, HOXD11	0.373929	0.0231426	0.449175	GOTERM_BP_FAT	GO:0009792~embryonic development ending in birth or egg hatching	16	2.82157e-08	TBX15, GSC, LMX1B, EPAS1, TBX3, PROX1, ZIC2, DLX2, MSX1, HOXD3, PAX7, GATA4, TFAP2A, ALX4, NKX2-5, FOXD3	2.90335e-05	1.5281e-06	4.47423e-05	GOTERM_BP_FAT	GO:0045596~negative regulation of cell differentiation	8	0.0733607	ISL2, DLX1, LBX1, CDX2, SMAD7, MAFB, PRDM16, NKX2-2	1	0.703117	72.6547	GOTERM_MF_FAT	GO:0016564~transcription repressor activity	3	0.428991	MEIS2, PAX3, PRDM16	1	0.992656	99.8292
GOTERM_BP_FAT	GO:0048598~embryonic morphogenesis	14	0.00225703	SHROOM3, FOXA2, HOXA13, TBX5, NR4A3, GLI3, HOXD11, SPRY2, DLX2, NOTCH1, GBX2, ROR2, FOXC1, MYC	0.98134	0.124284	3.75514	GOTERM_BP_FAT	GO:0048568~embryonic organ development	12	6.67413e-08	TCF21, DLX2, FOXL2, GSC, TBX15, EPAS1, HOXD3, GATA4, TFAP2A, ALX4, PROX1, FOXD3	6.86744e-05	3.43383e-06	0.000105833	GOTERM_BP_FAT	GO:0021515~cell differentiation in spinal cord	3	0.0854863	ISL2, LBX1, NKX2-2	1	0.738845	78.146
GOTERM_BP_FAT	GO:0048665~neuron fate specification	4	0.00232127	FOXA2, FOXA1, TLX3, GLI3	0.983341	0.123739	3.86004	GOTERM_BP_FAT	GO:0048562~embryonic organ morphogenesis	10	6.91854e-07	TCF21, DLX2, FOXL2, GSC, TBX15, HOXD3, GATA4, TFAP2A, ALX4, PROX1	0.000711665	2.96628e-05	0.00109709	GOTERM_BP_FAT	GO:0045665~negative regulation of neuron differentiation	3	0.129519	ISL2, LBX1, NKX2-2	1	0.835232	90.5634	Annotation Cluster 4	Enrichment Score: 2.2896011517316563
GOTERM_BP_FAT	GO:0045665~negative regulation of neuron differentiation	5	0.00259928	IRX3, NOTCH1, FOXA2, PAX6, TLX3	0.989805	0.133514	4.31283	GOTERM_BP_FAT	GO:0001501~skeletal system development	14	7.7562e-07	GSC, TBX15, TBX3, SOX9, COL9A1, DLX2, COL9A2, MSX1, HOXC11, HOXD3, PAX7, TFAP2A, ALX4, WNT7A	0.000797795	3.06962e-05	0.00122991	GOTERM_BP_FAT	GO:0021510~spinal cord development	3	0.177508	ISL2, LBX1, NKX2-2	1	0.897872	96.405	Category	Term	Count	PValue	Genes	Bonferroni	Benjamini	FDR
GOTERM_BP_FAT	GO:0030324~lung development	7	0.00428941	CEBPA, SPRY2, NOTCH1, FOXA2, TBX5, FOXA1, GLI3	0.999486	0.185115	7.02259	GOTERM_BP_FAT	GO:0048705~skeletal system morphogenesis	8	2.13422e-05	DLX2, GSC, TBX15, HOXD3, TFAP2A, SOX9, ALX4, WNT7A	0.021722	0.000522754	0.0338376									INTERPRO	IPR001092:Basic helix-loop-helix dimerisation region bHLH	5	0.000920725	OLIG3, HAND2, EBF2, SIM1, TWIST1	0.118559	0.0249236	1.07689
GOTERM_BP_FAT	GO:0051960~regulation of nervous system development	10	0.00477354	DLX2, IRX3, NOTCH1, FOXA2, BCL2, FOXA1, PAX6, LHX5, CHRNB2, TLX3	0.999782	0.198982	7.78539	GOTERM_BP_FAT	GO:0048706~embryonic skeletal system development	7	2.4366e-05	DLX2, GSC, TBX15, PAX7, HOXD3, TFAP2A, ALX4	0.0247612	0.000569678	0.0386309	Annotation Cluster 4	Enrichment Score: 3.0872123403814125							SMART	SM00353:HLH	5	0.00477364	OLIG3, HAND2, EBF2, SIM1, TWIST1	0.189856	0.0999199	4.37806
GOTERM_BP_FAT	GO:0030323~respiratory tube development	7	0.00509516	CEBPA, SPRY2, NOTCH1, FOXA2, TBX5, FOXA1, GLI3	0.999877	0.20609	8.28888	GOTERM_BP_FAT	GO:0048704~embryonic skeletal system morphogenesis	6	6.77399e-05	DLX2, GSC, TBX15, HOXD3, TFAP2A, ALX4	0.0673327	0.00126659	0.107363	Category	Term	Count	PValue	Genes	Bonferroni	Benjamini	FDR	UP_SEQ_FEATURE	domain:Helix-loop-helix motif	4	0.00780923	OLIG3, HAND2, SIM1, TWIST1	0.916695	0.391677	10.0256
GOTERM_BP_FAT	GO:0032583~regulation of gene-specific transcription	8	0.00609887	CEBPA, DLX2, NOTCH1, CDKN1B, FOXA2, TBX5, NR2F2, GDNF	0.999979	0.231185	9.84356	GOTERM_BP_FAT	GO:0048701~embryonic cranial skeleton morphogenesis	3	0.00796143	DLX2, TBX15, TFAP2A	0.999732	0.0829378	11.9048	GOTERM_BP_FAT	GO:0006928~cell motion	21	0.000142442	PTPRK, EGR2, BARHL2, EMX2, NR4A2, NEUROG2, VAV2, TPM1, TBR1, ARX, SEMA5A, CTTNBP2, FEZF2, CDH13, ATOH1, ISL2, LHX2, FOXE1, POU3F2, JAK2, NR2F2	0.229807	0.0152423	0.242133	UP_SEQ_FEATURE	DNA-binding region:Basic motif	4	0.0202306	OLIG3, HAND2, SIM1, TWIST1	0.998464	0.555078	24.0738
GOTERM_BP_FAT	GO:0060541~respiratory system development	7	0.00667733	CEBPA, SPRY2, NOTCH1, FOXA2, TBX5, FOXA1, GLI3	0.999993	0.226344	10.7283	GOTERM_BP_FAT	GO:0001701~in utero embryonic development	6	0.0106385	MSX1, LMX1B, TBX3, EPAS1, GATA4, FOXD3	0.999983	0.105212	15.5999	GOTERM_BP_FAT	GO:0048858~cell projection morphogenesis	15	0.000156129	EGR2, ONECUT2, NR4A2, NEUROG2, PCM1, TBR1, ARX, SEMA5A, FEZF2, ATOH1, ISL2, LHX2, JAK2, IFT88, SLITRK5	0.248893	0.0157747	0.265371
GOTERM_BP_FAT	GO:0050767~regulation of neurogenesis	9	0.00751447	DLX2, IRX3, NOTCH1, FOXA2, BCL2, FOXA1, PAX6, CHRNB2, TLX3	0.999998	0.237562	11.9941									GOTERM_BP_FAT	GO:0032989~cellular component morphogenesis	19	0.000204077	EGR2, ONECUT2, NR4A2, NEUROG2, PCM1, TPM1, TBR1, ARX, SEMA5A, FEZF2, ATOH1, ISL2, ANK1, LHX2, FOXF1, JAK2, MAP7, SLITRK5, IFT88	0.312099	0.0194974	0.346733	Annotation Cluster 5	Enrichment Score: 2.1869619447260047
GOTERM_BP_FAT	GO:0060284~regulation of cell development	10	0.00754797	DLX2, IRX3, NOTCH1, FOXA2, BCL2, FOXA1, PAX6, CHRNB2, TLX3, HOXD11	0.999998	0.234327	12.0444	Annotation Cluster 6	Enrichment Score: 5.218724238810125							GOTERM_BP_FAT	GO:0000902~cell morphogenesis	18	0.000218075	EGR2, ONECUT2, NR4A2, NEUROG2, PCM1, TBR1, ARX, SEMA5A, FEZF2, ATOH1, ISL2, ANK1, LHX2, FOXF1, JAK2, MAP7, IFT88, SLITRK5	0.329529	0.0197903	0.370476	Category	Term	Count	PValue	Genes	Bonferroni	Benjamini	FDR
GOTERM_BP_FAT	GO:0045664~regulation of neuron differentiation	8	0.00759773	IRX3, NOTCH1, FOXA2, BCL2, FOXA1, PAX6, CHRNB2, TLX3	0.999999	0.23164	12.1191	Category	Term	Count	PValue	Genes	Bonferroni	Benjamini	FDR	GOTERM_BP_FAT	GO:0032990~cell part morphogenesis	15	0.000254992	EGR2, ONECUT2, NR4A2, NEUROG2, PCM1, TBR1, ARX, SEMA5A, FEZF2, ATOH1, ISL2, LHX2, JAK2, IFT88, SLITRK5	0.373408	0.021024	0.433063	GOTERM_BP_FAT	GO:0045596~negative regulation of cell differentiation	7	0.000301404	PHOX2B, LBX1, SIX2, VAX1, PRDM16, NKX2-2, TWIST1	0.142246	0.00804314	0.434242
GOTERM_BP_FAT	GO:0045597~positive regulation of cell differentiation	10	0.0101763	IRX3, NOTCH1, CDKN2B, FOXA2, TBX5, BCL2, FOXA1, PAX6, GLI3, HOXD11	1	0.271075	15.9079	GOTERM_BP_FAT	GO:0006357~regulation of transcription from RNA polymerase II promoter	26	1.00551e-10	SOX21, HELT, CDX4, SOX9, PRDM16, WT1, GATA4, OLIG2, ALX4, NKX2-5, NKX2-2, FOXD3, NKX2-3, FOXL2, GSC, TBX3, LMX1B, EPAS1, BARHL2, NR4A2, TBR1, PROX1, DLX2, MSX1, TFAP2A, NR5A2	1.03467e-07	1.72444e-08	1.59446e-07	GOTERM_BP_FAT	GO:0030030~cell projection organization	18	0.000348124	EGR2, ONECUT2, NR4A2, NEUROG2, PCM1, VAV2, TPM1, TBR1, ARX, SEMA5A, CDH13, FEZF2, ATOH1, ISL2, LHX2, JAK2, SLITRK5, IFT88	0.47177	0.0273674	0.590793	GOTERM_BP_FAT	GO:0050767~regulation of neurogenesis	6	0.00099436	PHOX2B, LBX1, BARHL2, VWC2, VAX1, NKX2-2	0.397327	0.023825	1.42596
GOTERM_BP_FAT	GO:0051094~positive regulation of developmental process	11	0.0113612	IRX3, NOTCH1, CDKN2B, FOXA2, TBX5, BCL2, FOXA1, PAX6, VASH2, GLI3, HOXD11	1	0.269903	17.5968	GOTERM_BP_FAT	GO:0010629~negative regulation of gene expression	17	1.06812e-06	GSC, TBX3, HELT, CDX4, FZD1, SOX9, PRDM16, PROX1, LIN28B, WT1, TCF21, DLX2, MSX1, OLIG2, NKX2-5, FOXD3, ZNF423	0.0010985	4.07065e-05	0.00169374	GOTERM_BP_FAT	GO:0030182~neuron differentiation	20	0.000425764	EGR2, LBX1, ONECUT2, BARHL2, EMX2, NR4A2, NEUROG2, TBR1, OTP, ARX, SEMA5A, FEZF2, ATOH1, DLX1, ISL2, LHX2, POU3F2, JAK2, SLITRK5, NKX2-2	0.541865	0.0320014	0.722106	GOTERM_BP_FAT	GO:0051960~regulation of nervous system development	6	0.00170573	PHOX2B, LBX1, BARHL2, VWC2, VAX1, NKX2-2	0.580611	0.0355589	2.43446
GOTERM_BP_FAT	GO:0060429~epithelium development	9	0.0122625	SHROOM3, FOXA2, TBX5, BCL2, FOXA1, PAX6, NR2F2, GLI3, HOXD11	1	0.280642	18.8602	GOTERM_BP_FAT	GO:0016481~negative regulation of transcription	16	1.68132e-06	GSC, HELT, TBX3, CDX4, FZD1, SOX9, PRDM16, PROX1, WT1, TCF21, DLX2, MSX1, OLIG2, NKX2-5, FOXD3, ZNF423	0.00172858	6.17867e-05	0.00266608	GOTERM_BP_FAT	GO:0007411~axon guidance	9	0.000862555	ARX, SEMA5A, FEZF2, ISL2, ATOH1, EGR2, LHX2, NEUROG2, TBR1	0.794384	0.0613099	1.45781	GOTERM_BP_FAT	GO:0060284~regulation of cell development	6	0.00233449	PHOX2B, LBX1, BARHL2, VWC2, VAX1, NKX2-2	0.695671	0.0401923	3.31785
GOTERM_BP_FAT	GO:0009952~anterior/posterior pattern formation	8	0.0122875	NOTCH1, FOXA2, PAX6, GBX2, ROR2, NR2F2, GLI3, HOXD11	1	0.277577	18.8949	GOTERM_BP_FAT	GO:0045892~negative regulation of transcription, DNA-dependent	14	2.63591e-06	GSC, HELT, TBX3, CDX4, SOX9, PRDM16, PROX1, WT1, TCF21, DLX2, MSX1, OLIG2, NKX2-5, FOXD3	0.00270868	9.04078e-05	0.00417975	GOTERM_BP_FAT	GO:0007409~axonogenesis	12	0.00090555	ARX, SEMA5A, FEZF2, ISL2, ATOH1, EGR2, LHX2, NR4A2, NEUROG2, JAK2, TBR1, SLITRK5	0.80998	0.0618733	1.52995	GOTERM_BP_FAT	GO:0045664~regulation of neuron differentiation	5	0.00328657	PHOX2B, LBX1, BARHL2, VWC2, NKX2-2	0.812808	0.0526174	4.64132
GOTERM_BP_FAT	GO:0007389~pattern specification process	11	0.0151618	DLX2, NOTCH1, SHROOM3, FOXA2, TBX5, PAX6, GBX2, ROR2, NR2F2, GLI3, HOXD11	1	0.295034	22.8014	GOTERM_BP_FAT	GO:0051253~negative regulation of RNA metabolic process	14	3.16771e-06	GSC, HELT, TBX3, CDX4, SOX9, PRDM16, PROX1, WT1, TCF21, DLX2, MSX1, OLIG2, NKX2-5, FOXD3	0.00325427	0.000105142	0.005023	GOTERM_BP_FAT	GO:0048667~cell morphogenesis involved in neuron differentiation	12	0.00157829	ARX, SEMA5A, FEZF2, ISL2, ATOH1, EGR2, LHX2, NR4A2, NEUROG2, JAK2, TBR1, SLITRK5	0.944717	0.0865056	2.65228	GOTERM_BP_FAT	GO:0045666~positive regulation of neuron differentiation	3	0.00573976	PHOX2B, VWC2, NKX2-2	0.946601	0.0723744	7.97418
GOTERM_BP_FAT	GO:0045596~negative regulation of cell differentiation	9	0.0206961	DLX2, IRX3, CCND1, NOTCH1, FOXA2, PAX6, TLX3, PRDM16, GLI3	1	0.355114	29.8298	GOTERM_BP_FAT	GO:0045934~negative regulation of nucleobase, nucleoside, nucleotide and nucleic acid metabolic process	16	6.39647e-06	GSC, HELT, TBX3, CDX4, FZD1, SOX9, PRDM16, PROX1, WT1, TCF21, DLX2, MSX1, OLIG2, NKX2-5, FOXD3, ZNF423	0.00656038	0.000199434	0.0101426	GOTERM_BP_FAT	GO:0048812~neuron projection morphogenesis	12	0.00185862	ARX, SEMA5A, FEZF2, ISL2, ATOH1, EGR2, LHX2, NR4A2, NEUROG2, JAK2, TBR1, SLITRK5	0.966959	0.0928333	3.11637	GOTERM_BP_FAT	GO:0045665~negative regulation of neuron differentiation	3	0.0109365	PHOX2B, LBX1, NKX2-2	0.996292	0.11696	14.6794
GOTERM_BP_FAT	GO:0003002~regionalization	9	0.0206961	DLX2, NOTCH1, FOXA2, PAX6, GBX2, ROR2, NR2F2, GLI3, HOXD11	1	0.355114	29.8298	GOTERM_BP_FAT	GO:0051172~negative regulation of nitrogen compound metabolic process	16	7.53084e-06	GSC, HELT, TBX3, CDX4, FZD1, SOX9, PRDM16, PROX1, WT1, TCF21, DLX2, MSX1, OLIG2, NKX2-5, FOXD3, ZNF423	0.00771931	0.000227893	0.0119412	GOTERM_BP_FAT	GO:0000904~cell morphogenesis involved in differentiation	12	0.0050368	ARX, SEMA5A, FEZF2, ISL2, ATOH1, EGR2, LHX2, NR4A2, NEUROG2, JAK2, TBR1, SLITRK5	0.999904	0.16597	8.23447	GOTERM_BP_FAT	GO:0045597~positive regulation of cell differentiation	3	0.256628	PHOX2B, VWC2, NKX2-2	1	0.852029	98.6175
GOTERM_BP_FAT	GO:0010551~regulation of specific transcription from RNA polymerase II promoter	6	0.0233135	CEBPA, DLX2, NOTCH1, FOXA2, TBX5, GDNF	1	0.363513	32.9397	GOTERM_BP_FAT	GO:0010558~negative regulation of macromolecule biosynthetic process	16	1.40783e-05	GSC, HELT, TBX3, CDX4, FZD1, SOX9, PRDM16, PROX1, WT1, TCF21, DLX2, MSX1, OLIG2, NKX2-5, FOXD3, ZNF423	0.0143822	0.000381155	0.022322	GOTERM_BP_FAT	GO:0031175~neuron projection development	12	0.0072258	ARX, SEMA5A, FEZF2, ISL2, ATOH1, EGR2, LHX2, NR4A2, NEUROG2, JAK2, TBR1, SLITRK5	0.999998	0.208013	11.6104	GOTERM_BP_FAT	GO:0051094~positive regulation of developmental process	3	0.328646	PHOX2B, VWC2, NKX2-2	1	0.913149	99.6825
GOTERM_BP_FAT	GO:0048729~tissue morphogenesis	8	0.0250085	NOTCH1, SHROOM3, TBX5, BCL2, FOXC1, NR4A3, GLI3, HOXD11	1	0.381119	34.884	GOTERM_BP_FAT	GO:0031327~negative regulation of cellular biosynthetic process	16	1.89534e-05	GSC, HELT, TBX3, CDX4, FZD1, SOX9, PRDM16, PROX1, WT1, TCF21, DLX2, MSX1, OLIG2, NKX2-5, FOXD3, ZNF423	0.0193143	0.000475575	0.0300507	GOTERM_BP_FAT	GO:0048666~neuron development	13	0.0192734	EGR2, ONECUT2, NR4A2, NEUROG2, TBR1, SEMA5A, ARX, FEZF2, ATOH1, ISL2, LHX2, JAK2, SLITRK5	1	0.374612	28.1938
GOTERM_BP_FAT	GO:0021915~neural tube development	5	0.0338953	SHROOM3, FOXA2, PAX6, GBX2, GLI3	1	0.433253	44.2394	GOTERM_BP_FAT	GO:0009890~negative regulation of biosynthetic process	16	2.42684e-05	GSC, HELT, TBX3, CDX4, FZD1, SOX9, PRDM16, PROX1, WT1, TCF21, DLX2, MSX1, OLIG2, NKX2-5, FOXD3, ZNF423	0.0246633	0.000580588	0.0384762									Annotation Cluster 6	Enrichment Score: 2.0946319973536425
GOTERM_BP_FAT	GO:0030900~forebrain development	7	0.0407551	DLX2, NOTCH1, PAX6, POU3F3, CHRNB2, NR2F2, GLI3	1	0.483404	50.5795	GOTERM_BP_FAT	GO:0000122~negative regulation of transcription from RNA polymerase II promoter	11	3.1696e-05	DLX2, MSX1, GSC, HELT, CDX4, OLIG2, PRDM16, PROX1, NKX2-5, WT1, FOXD3	0.0320895	0.000708785	0.0502493	Annotation Cluster 5	Enrichment Score: 2.7853677545799225							Category	Term	Count	PValue	Genes	Bonferroni	Benjamini	FDR
GOTERM_BP_FAT	GO:0021543~pallium development	4	0.0434163	DLX2, PAX6, POU3F3, GLI3	1	0.493427	52.8513	GOTERM_BP_FAT	GO:0010605~negative regulation of macromolecule metabolic process	17	0.000114214	GSC, TBX3, HELT, CDX4, FZD1, SOX9, PRDM16, PROX1, LIN28B, WT1, TCF21, DLX2, MSX1, OLIG2, NKX2-5, FOXD3, ZNF423	0.110889	0.00195696	0.180958	Category	Term	Count	PValue	Genes	Bonferroni	Benjamini	FDR	GOTERM_BP_FAT	GO:0001764~neuron migration	5	0.000202193	PHOX2B, BARHL2, NR4A2, VAX1, TWIST1	0.0978067	0.00641226	0.2915
GOTERM_BP_FAT	GO:0043193~positive regulation of gene-specific transcription	5	0.0481169	CEBPA, NOTCH1, TBX5, NR2F2, GDNF	1	0.51232	56.6257	GOTERM_MF_FAT	GO:0016564~transcription repressor activity	8	0.00842303	MSX1, TBX3, HELT, MXD1, PRDM16, PROX1, NKX2-5, ZNF423	0.686151	0.109422	9.46422	GOTERM_BP_FAT	GO:0006928~cell motion	21	0.000142442	PTPRK, EGR2, BARHL2, EMX2, NR4A2, NEUROG2, VAV2, TPM1, TBR1, ARX, SEMA5A, CTTNBP2, FEZF2, CDH13, ATOH1, ISL2, LHX2, FOXE1, POU3F2, JAK2, NR2F2	0.229807	0.0152423	0.242133	GOTERM_BP_FAT	GO:0006928~cell motion	8	0.0037846	PHOX2B, FEZF2, LYPD3, BARHL2, NR4A2, VAX1, PAX3, TWIST1	0.854854	0.056808	5.32689
GOTERM_BP_FAT	GO:0021532~neural tube patterning	3	0.0555293	FOXA2, PAX6, GBX2	1	0.544536	62.0053									GOTERM_BP_FAT	GO:0001764~neuron migration	7	0.00100103	ARX, CTTNBP2, ATOH1, BARHL2, NR4A2, NEUROG2, NR2F2	0.840516	0.0634615	1.68998	GOTERM_BP_FAT	GO:0016477~cell migration	6	0.00648489	PHOX2B, BARHL2, NR4A2, VAX1, PAX3, TWIST1	0.963541	0.0794545	8.96482
GOTERM_BP_FAT	GO:0030855~epithelial cell differentiation	5	0.0651649	SHROOM3, FOXA2, FOXA1, PAX6, NR2F2	1	0.58501	68.0636	Annotation Cluster 7	Enrichment Score: 4.61766023355318							GOTERM_BP_FAT	GO:0016477~cell migration	13	0.00262169	PTPRK, BARHL2, EMX2, NR4A2, NEUROG2, VAV2, ARX, CDH13, CTTNBP2, ATOH1, FOXE1, POU3F2, NR2F2	0.991867	0.0993206	4.36917	GOTERM_BP_FAT	GO:0048870~cell motility	6	0.00960794	PHOX2B, BARHL2, NR4A2, VAX1, PAX3, TWIST1	0.992658	0.110417	13.0099
GOTERM_BP_FAT	GO:0043009~chordate embryonic development	11	0.0655849	CEBPA, DLX2, SHROOM3, FOXA2, PAX6, GBX2, ROR2, FOXC1, GLI3, APBA1, FOXD3	1	0.58207	68.3058	Category	Term	Count	PValue	Genes	Bonferroni	Benjamini	FDR	GOTERM_BP_FAT	GO:0051674~localization of cell	13	0.00562662	PTPRK, BARHL2, EMX2, NR4A2, NEUROG2, VAV2, ARX, CDH13, CTTNBP2, ATOH1, FOXE1, POU3F2, NR2F2	0.999968	0.180367	9.15586	GOTERM_BP_FAT	GO:0051674~localization of cell	6	0.00960794	PHOX2B, BARHL2, NR4A2, VAX1, PAX3, TWIST1	0.992658	0.110417	13.0099
GOTERM_BP_FAT	GO:0009792~embryonic development ending in birth or egg hatching	11	0.0687174	CEBPA, DLX2, SHROOM3, FOXA2, PAX6, GBX2, ROR2, FOXC1, GLI3, APBA1, FOXD3	1	0.591804	70.0582	GOTERM_BP_FAT	GO:0030182~neuron differentiation	22	9.31588e-12	PHOX2A, SOX1, EMX1, HELT, LMX1B, BARHL2, NR4A2, LMX1A, TBR1, FEZF1, DLX2, FEZF2, BDNF, ISL2, LHX1, PAX7, LHX2, OLIG2, CACNA1F, SLITRK5, WNT7A, NKX2-2	9.58604e-09	1.91721e-09	1.47724e-08	GOTERM_BP_FAT	GO:0048870~cell motility	13	0.00562662	PTPRK, BARHL2, EMX2, NR4A2, NEUROG2, VAV2, ARX, CDH13, CTTNBP2, ATOH1, FOXE1, POU3F2, NR2F2	0.999968	0.180367	9.15586	GOTERM_BP_FAT	GO:0016265~death	4	0.590554	HAND2, NR4A2, PAX3, TWIST1	1	0.99164	99.9997
GOTERM_BP_FAT	GO:0010552~positive regulation of specific transcription from RNA polymerase II promoter	4	0.0756151	CEBPA, NOTCH1, TBX5, GDNF	1	0.610328	73.6009	GOTERM_BP_FAT	GO:0000904~cell morphogenesis involved in differentiation	12	2.20288e-06	FEZF1, FEZF2, ISL2, BDNF, LHX2, NR4A2, LMX1A, CACNA1F, SOX9, PROX1, TBR1, SLITRK5	0.00226419	7.81611e-05	0.0034931
GOTERM_BP_FAT	GO:0009953~dorsal/ventral pattern formation	4	0.078949	FOXA2, PAX6, GLI3, HOXD11	1	0.621874	75.1682	GOTERM_BP_FAT	GO:0007409~axonogenesis	10	1.4842e-05	FEZF1, FEZF2, ISL2, BDNF, LHX2, NR4A2, LMX1A, CACNA1F, TBR1, SLITRK5	0.0151565	0.000381742	0.0235328	Annotation Cluster 6	Enrichment Score: 2.434505137393237							Annotation Cluster 7	Enrichment Score: 2.0278070519288716
SP_PIR_KEYWORDS	DNA binding	10	0.0837196	HIST1H2AB, ZNF30, INSM1, HOXA13, PAX6, GBX2, SOX4, NR2F2, GLI3, HOXD11	1	0.662085	68.3854	GOTERM_BP_FAT	GO:0048667~cell morphogenesis involved in neuron differentiation	10	2.79286e-05	FEZF1, FEZF2, ISL2, BDNF, LHX2, NR4A2, LMX1A, CACNA1F, TBR1, SLITRK5	0.0283299	0.000638439	0.044278	Category	Term	Count	PValue	Genes	Bonferroni	Benjamini	FDR	Category	Term	Count	PValue	Genes	Bonferroni	Benjamini	FDR
GOTERM_BP_FAT	GO:0021537~telencephalon development	4	0.100241	DLX2, PAX6, POU3F3, GLI3	1	0.678533	83.2909	GOTERM_BP_FAT	GO:0048812~neuron projection morphogenesis	10	3.24199e-05	FEZF1, FEZF2, ISL2, BDNF, LHX2, NR4A2, LMX1A, CACNA1F, TBR1, SLITRK5	0.0328103	0.00070955	0.0513968	GOTERM_BP_FAT	GO:0035270~endocrine system development	8	0.000242136	HOXA3, PAX8, ONECUT2, CRH, FOXE1, POU3F2, NKX2-2, OTP	0.358464	0.0209158	0.411273	GOTERM_BP_FAT	GO:0045165~cell fate commitment	5	0.00389339	LBX1, BARHL2, ONECUT2, PAX3, NKX2-2	0.862702	0.0567275	5.47603
GOTERM_BP_FAT	GO:0010720~positive regulation of cell development	4	0.123554	NOTCH1, BCL2, PAX6, HOXD11	1	0.730946	89.289	GOTERM_BP_FAT	GO:0048666~neuron development	12	4.84551e-05	FEZF1, FEZF2, ISL2, BDNF, LMX1B, SOX1, LHX2, NR4A2, LMX1A, CACNA1F, TBR1, SLITRK5	0.0486388	0.000977198	0.0768089	GOTERM_BP_FAT	GO:0048732~gland development	8	0.00925652	CTTNBP2, BCAT2, HOXA3, PAX8, CRH, FOXE1, POU3F2, OTP	1	0.247311	14.6374	GOTERM_BP_FAT	GO:0021515~cell differentiation in spinal cord	3	0.00676302	LBX1, PAX3, NKX2-2	0.968383	0.0807945	9.33204
GOTERM_BP_FAT	GO:0048589~developmental growth	4	0.135885	NOTCH1, BCL2, GLI3, HOXD11	1	0.747449	91.5744	GOTERM_BP_FAT	GO:0000902~cell morphogenesis	12	7.5261e-05	FEZF1, FEZF2, ISL2, BDNF, LHX2, NR4A2, LMX1A, CACNA1F, SOX9, PROX1, TBR1, SLITRK5	0.0745235	0.00138202	0.119277	GOTERM_BP_FAT	GO:0030878~thyroid gland development	3	0.0221808	HOXA3, PAX8, FOXE1	1	0.401865	31.7317	GOTERM_BP_FAT	GO:0021510~spinal cord development	3	0.0159813	LBX1, PAX3, NKX2-2	0.999725	0.154097	20.7512
GOTERM_BP_FAT	GO:0007398~ectoderm development	4	0.340852	NOTCH1, FOXA2, BCL2, PAX6	1	0.936769	99.9141	GOTERM_BP_FAT	GO:0048858~cell projection morphogenesis	10	9.58296e-05	FEZF1, FEZF2, ISL2, BDNF, LHX2, NR4A2, LMX1A, CACNA1F, TBR1, SLITRK5	0.093907	0.00167002	0.151851									GOTERM_BP_FAT	GO:0048663~neuron fate commitment	3	0.0183946	LBX1, PAX3, NKX2-2	0.999921	0.169141	23.5113
GOTERM_BP_FAT	GO:0001701~in utero embryonic development	5	0.362102	CEBPA, FOXC1, GLI3, APBA1, FOXD3	1	0.946811	99.9507	GOTERM_BP_FAT	GO:0032990~cell part morphogenesis	10	0.000133764	FEZF1, FEZF2, ISL2, BDNF, LHX2, NR4A2, LMX1A, CACNA1F, TBR1, SLITRK5	0.128599	0.00221774	0.211903	Annotation Cluster 7	Enrichment Score: 2.3982703048689453
GOTERM_BP_FAT	GO:0008544~epidermis development	3	0.559171	NOTCH1, BCL2, PAX6	1	0.986886	99.9999	GOTERM_BP_FAT	GO:0031175~neuron projection development	10	0.000133764	FEZF1, FEZF2, ISL2, BDNF, LHX2, NR4A2, LMX1A, CACNA1F, TBR1, SLITRK5	0.128599	0.00221774	0.211903	Category	Term	Count	PValue	Genes	Bonferroni	Benjamini	FDR	Annotation Cluster 8	Enrichment Score: 1.8868305747084917
								GOTERM_BP_FAT	GO:0007411~axon guidance	7	0.000154824	FEZF1, FEZF2, ISL2, BDNF, LHX2, LMX1A, TBR1	0.147282	0.0025258	0.245227	GOTERM_BP_FAT	GO:0016481~negative regulation of transcription	19	0.0016008	PTPRK, RSF1, CDX2, FOXK1, SMAD7, L3MBTL, TAF7, CENPF, PRDM16, KCNIP3, DLX1, CDKN1B, ID2, YWHAQ, FOXE1, BCOR, NR2F2, SMARCA2, FOXD3	0.946955	0.0851436	2.68961	Category	Term	Count	PValue	Genes	Bonferroni	Benjamini	FDR
Annotation Cluster 5	Enrichment Score: 1.998815366884488							GOTERM_BP_FAT	GO:0032989~cellular component morphogenesis	12	0.000196573	FEZF1, FEZF2, ISL2, BDNF, LHX2, NR4A2, LMX1A, CACNA1F, SOX9, PROX1, TBR1, SLITRK5	0.183145	0.00310737	0.311257	GOTERM_BP_FAT	GO:0010629~negative regulation of gene expression	20	0.00195373	PTPRK, RSF1, CDX2, FOXK1, SMAD7, L3MBTL, TAF7, CENPF, PRDM16, KCNIP3, DLX1, CDKN1B, ID2, YWHAQ, FOXE1, BCOR, NR2F2, INSR, SMARCA2, FOXD3	0.972255	0.0947775	3.27336	INTERPRO	IPR011991:Winged helix repressor DNA-binding	5	0.00489954	PAX9, FOXB2, PAX3, FOXD1, FOXD3	0.489766	0.106088	5.60967
Category	Term	Count	PValue	Genes	Bonferroni	Benjamini	FDR	GOTERM_BP_FAT	GO:0006928~cell motion	13	0.000234571	LMX1B, SOX1, BARHL2, NR4A2, LMX1A, TBR1, COL5A1, FEZF1, FEZF2, BDNF, ISL2, LHX2, NKX2-3	0.214474	0.00354374	0.371319	GOTERM_BP_FAT	GO:0045892~negative regulation of transcription, DNA-dependent	16	0.00206392	CDX2, RSF1, FOXK1, SMAD7, TAF7, PRDM16, KCNIP3, DLX1, CDKN1B, ID2, YWHAQ, FOXE1, BCOR, NR2F2, SMARCA2, FOXD3	0.977338	0.0972895	3.45494	UP_SEQ_FEATURE	DNA-binding region:Fork-head	3	0.012943	FOXB2, FOXD1, FOXD3	0.983913	0.497564	16.1004
GOTERM_BP_FAT	GO:0006357~regulation of transcription from RNA polymerase II promoter	25	0.00112628	FOXA2, HOXA13, GLIS1, RBM4, PAX6, PRDM16, GDNF, CBFB, ZNF174, NPAS1, POU3F3, MAML3, NR2F2, MYC, FOXD3, CEBPA, ELP3, TBX5, FOXA1, NR4A3, FOSB, DLX2, NOTCH1, BCL6B, FOXC1	0.862705	0.0763527	1.89076	GOTERM_BP_FAT	GO:0030030~cell projection organization	10	0.00183004	FEZF1, FEZF2, ISL2, BDNF, LHX2, NR4A2, LMX1A, CACNA1F, TBR1, SLITRK5	0.848146	0.0230009	2.86282	GOTERM_BP_FAT	GO:0010558~negative regulation of macromolecule biosynthetic process	21	0.00210504	PTPRK, RSF1, CDX2, FOXK1, BLM, SMAD7, L3MBTL, TAF7, CENPF, PRDM16, KCNIP3, DLX1, CDKN1B, ID2, YWHAQ, FOXE1, BCOR, NR2F2, GHSR, SMARCA2, FOXD3	0.978987	0.0966521	3.52262	INTERPRO	IPR018122:Transcription factor, fork head, conserved site	3	0.0135209	FOXB2, FOXD1, FOXD3	0.845105	0.23389	14.7866
GOTERM_BP_FAT	GO:0051253~negative regulation of RNA metabolic process	15	0.00324569	CEBPA, GLIS1, FOXA1, TRIM24, FOSB, PRDM16, ZNF174, NPAS1, RPS26, DLX2, CDKN1B, BCL6B, POU3F3, NR2F2, FOXD3	0.996747	0.150972	5.35787									GOTERM_BP_FAT	GO:0045934~negative regulation of nucleobase, nucleoside, nucleotide and nucleic acid metabolic process	20	0.00225836	PTPRK, RSF1, CDX2, FOXK1, BLM, SMAD7, L3MBTL, TAF7, CENPF, PRDM16, KCNIP3, DLX1, CDKN1B, ID2, YWHAQ, FOXE1, BCOR, NR2F2, SMARCA2, FOXD3	0.984145	0.100812	3.77458	INTERPRO	IPR001766:Transcription factor, fork head	3	0.0135209	FOXB2, FOXD1, FOXD3	0.845105	0.23389	14.7866
GOTERM_BP_FAT	GO:0000122~negative regulation of transcription from RNA polymerase II promoter	12	0.00561688	CEBPA, DLX2, NPAS1, FOXA1, GLIS1, BCL6B, POU3F3, FOSB, NR2F2, PRDM16, FOXD3, ZNF174	0.999951	0.219735	9.10012	Annotation Cluster 8	Enrichment Score: 4.50483221365318							GOTERM_BP_FAT	GO:0032583~regulation of gene-specific transcription	9	0.00232566	DLX1, CDKN1B, LBX1, SMAD7, TAF7, BCOR, NR2F2, INSR, SMARCA2	0.985989	0.101203	3.88497	SMART	SM00339:FH	3	0.0317426	FOXB2, FOXD1, FOXD3	0.758122	0.376937	26.0508
GOTERM_BP_FAT	GO:0045892~negative regulation of transcription, DNA-dependent	14	0.00732274	CEBPA, GLIS1, FOXA1, FOSB, TRIM24, PRDM16, ZNF174, NPAS1, DLX2, CDKN1B, BCL6B, POU3F3, NR2F2, FOXD3	0.999998	0.236464	11.7057	Category	Term	Count	PValue	Genes	Bonferroni	Benjamini	FDR	GOTERM_BP_FAT	GO:0051253~negative regulation of RNA metabolic process	16	0.00238814	CDX2, RSF1, FOXK1, SMAD7, TAF7, PRDM16, KCNIP3, DLX1, CDKN1B, ID2, YWHAQ, FOXE1, BCOR, NR2F2, SMARCA2, FOXD3	0.987508	0.0990898	3.98735
GOTERM_BP_FAT	GO:0016481~negative regulation of transcription	16	0.0104589	CEBPA, RBM15B, GLIS1, FOXA1, TRIM24, FOSB, PRDM16, GLI3, ZNF174, NPAS1, DLX2, CDKN1B, BCL6B, POU3F3, NR2F2, FOXD3	1	0.269476	16.3136	GOTERM_BP_FAT	GO:0045165~cell fate commitment	9	9.87959e-06	DLX2, ISL2, HOXC11, PAX7, BARHL2, OLIG2, SOX9, PROX1, NKX2-2	0.0101147	0.000290419	0.0156652	GOTERM_BP_FAT	GO:0051172~negative regulation of nitrogen compound metabolic process	20	0.00248299	PTPRK, RSF1, CDX2, FOXK1, BLM, SMAD7, L3MBTL, TAF7, CENPF, PRDM16, KCNIP3, DLX1, CDKN1B, ID2, YWHAQ, FOXE1, BCOR, NR2F2, SMARCA2, FOXD3	0.989506	0.0983849	4.14258	Annotation Cluster 9	Enrichment Score: 1.371696323425662
GOTERM_BP_FAT	GO:0010629~negative regulation of gene expression	17	0.0111068	CEBPA, RBM15B, GLIS1, FOXA1, TRIM24, FOSB, PRDM16, GLI3, ZNF174, DLX2, NPAS1, CDKN1B, BCL6B, POU3F3, NR2F2, MYC, FOXD3	1	0.268294	17.237	GOTERM_BP_FAT	GO:0021510~spinal cord development	6	1.03707e-05	PHOX2A, ISL2, PAX7, OLIG2, PROX1, NKX2-2	0.0106148	0.000296388	0.0164439	GOTERM_BP_FAT	GO:0031327~negative regulation of cellular biosynthetic process	21	0.00252755	PTPRK, RSF1, CDX2, FOXK1, BLM, SMAD7, L3MBTL, TAF7, CENPF, PRDM16, KCNIP3, DLX1, CDKN1B, ID2, YWHAQ, FOXE1, BCOR, NR2F2, GHSR, SMARCA2, FOXD3	0.990331	0.0979504	4.21543	Category	Term	Count	PValue	Genes	Bonferroni	Benjamini	FDR
GOTERM_BP_FAT	GO:0045934~negative regulation of nucleobase, nucleoside, nucleotide and nucleic acid metabolic process	17	0.0124373	CEBPA, RBM15B, GLIS1, FOXA1, TRIM24, FOSB, PRDM16, GLI3, ZNF174, DLX2, NPAS1, RPS26, CDKN1B, BCL6B, POU3F3, NR2F2, FOXD3	1	0.273556	19.1031	GOTERM_BP_FAT	GO:0021515~cell differentiation in spinal cord	5	3.41176e-05	PHOX2A, ISL2, PAX7, OLIG2, NKX2-2	0.0344985	0.000731142	0.0540875	GOTERM_MF_FAT	GO:0016564~transcription repressor activity	14	0.00292587	CDX2, RSF1, FOXK1, TAF7, L3MBTL, PRDM16, KCNIP3, ATF3, ID2, FOXE1, BCOR, NFIL3, NR2F2, APEX1	0.693882	0.210817	4.01029	GOTERM_BP_FAT	GO:0035239~tube morphogenesis	5	0.00258269	LBX1, HAND2, PAX3, ZIC2, TWIST1	0.731872	0.0429277	3.66451
GOTERM_BP_FAT	GO:0051172~negative regulation of nitrogen compound metabolic process	17	0.013392	CEBPA, RBM15B, GLIS1, FOXA1, TRIM24, FOSB, PRDM16, GLI3, ZNF174, DLX2, NPAS1, RPS26, CDKN1B, BCL6B, POU3F3, NR2F2, FOXD3	1	0.27778	20.4175	GOTERM_BP_FAT	GO:0048663~neuron fate commitment	5	0.000273617	DLX2, ISL2, PAX7, OLIG2, NKX2-2	0.245417	0.00401464	0.433002	GOTERM_BP_FAT	GO:0010605~negative regulation of macromolecule metabolic process	25	0.00311496	CDX2, RSF1, FOXK1, BLM, PRDM16, KCNIP3, PPP2CA, BCOR, NR2F2, INSR, FOXD3, PTPRK, SMAD7, L3MBTL, TAF7, CENPF, DLX1, CDKN1B, ID2, JUN, PSMA3, FOXE1, YWHAQ, GHSR, SMARCA2	0.996716	0.114562	5.17087	GOTERM_BP_FAT	GO:0043009~chordate embryonic development	7	0.00466007	TBX15, HAND2, SIX2, PAX3, ZIC2, FOXD3, TWIST1	0.907219	0.0622363	6.52091
GOTERM_BP_FAT	GO:0010605~negative regulation of macromolecule metabolic process	21	0.0209904	CEBPA, RBM15B, GLIS1, FOXA1, TRIM24, IGF2BP3, FOSB, PRDM16, GLI3, ZNF174, DLX2, NPAS1, RPS26, CDKN1B, BCL6B, POU3F3, PCSK9, NR2F2, MYC, CLN8, FOXD3	1	0.349258	30.1861									GOTERM_BP_FAT	GO:0009890~negative regulation of biosynthetic process	21	0.00329427	PTPRK, RSF1, CDX2, FOXK1, BLM, SMAD7, L3MBTL, TAF7, CENPF, PRDM16, KCNIP3, DLX1, CDKN1B, ID2, YWHAQ, FOXE1, BCOR, NR2F2, GHSR, SMARCA2, FOXD3	0.997638	0.118392	5.46073	GOTERM_BP_FAT	GO:0009792~embryonic development ending in birth or egg hatching	7	0.00487776	TBX15, HAND2, SIX2, PAX3, ZIC2, FOXD3, TWIST1	0.916995	0.0633973	6.81563
GOTERM_BP_FAT	GO:0010558~negative regulation of macromolecule biosynthetic process	17	0.0221411	CEBPA, RBM15B, GLIS1, FOXA1, TRIM24, IGF2BP3, FOSB, PRDM16, GLI3, ZNF174, DLX2, NPAS1, CDKN1B, BCL6B, POU3F3, NR2F2, FOXD3	1	0.358066	31.5631	Annotation Cluster 9	Enrichment Score: 4.063715679635866							GOTERM_BP_FAT	GO:0000122~negative regulation of transcription from RNA polymerase II promoter	12	0.00940414	DLX1, CDX2, ID2, SMAD7, TAF7, FOXE1, BCOR, NR2F2, PRDM16, SMARCA2, FOXD3, KCNIP3	1	0.247176	14.8536	GOTERM_BP_FAT	GO:0001843~neural tube closure	3	0.00965233	PAX3, ZIC2, TWIST1	0.992823	0.108466	13.0662
GOTERM_BP_FAT	GO:0031327~negative regulation of cellular biosynthetic process	17	0.0251888	CEBPA, RBM15B, GLIS1, FOXA1, TRIM24, IGF2BP3, FOSB, PRDM16, GLI3, ZNF174, DLX2, NPAS1, CDKN1B, BCL6B, POU3F3, NR2F2, FOXD3	1	0.380104	35.0877	Category	Term	Count	PValue	Genes	Bonferroni	Benjamini	FDR	GOTERM_BP_FAT	GO:0032582~negative regulation of gene-specific transcription	5	0.0114114	CDKN1B, SMAD7, TAF7, BCOR, SMARCA2	1	0.269475	17.7427	GOTERM_BP_FAT	GO:0060606~tube closure	3	0.00965233	PAX3, ZIC2, TWIST1	0.992823	0.108466	13.0662
GOTERM_BP_FAT	GO:0009890~negative regulation of biosynthetic process	17	0.0303402	CEBPA, RBM15B, GLIS1, FOXA1, TRIM24, IGF2BP3, FOSB, PRDM16, GLI3, ZNF174, DLX2, NPAS1, CDKN1B, BCL6B, POU3F3, NR2F2, FOXD3	1	0.412704	40.6598	INTERPRO	IPR015492:Protocadherin gamma	7	1.63472e-09	PCDHGA12, PCDHGA10, PCDHGA11, PCDHGC3, PCDHGA4, PCDHGA3, PCDHGB5, PCDHGB4	3.13867e-07	7.84667e-08	2.03525e-06	GOTERM_BP_FAT	GO:0010551~regulation of specific transcription from RNA polymerase II promoter	6	0.0304142	DLX1, LBX1, SMAD7, TAF7, BCOR, SMARCA2	1	0.482274	40.8816	GOTERM_BP_FAT	GO:0060429~epithelium development	5	0.00975558	ONECUT2, PAX3, WT1, ZIC2, TWIST1	0.993194	0.107214	13.1969
								UP_SEQ_FEATURE	domain:Cadherin 6	8	2.47228e-07	PCDHGA12, DCHS2, PCDHGA10, PCDHGA11, PCDHGC3, PCDHGA4, PCDHGA3, PCDHGB5, PCDHGB4	0.000105314	3.51058e-05	0.000347994	GOTERM_BP_FAT	GO:0010553~negative regulation of specific transcription from RNA polymerase II promoter	4	0.0404805	SMAD7, TAF7, BCOR, SMARCA2	1	0.549461	50.5018	GOTERM_BP_FAT	GO:0014020~primary neural tube formation	3	0.0116053	PAX3, ZIC2, TWIST1	0.997372	0.121172	15.5086
Annotation Cluster 6	Enrichment Score: 1.9471780404187469							UP_SEQ_FEATURE	domain:Cadherin 5	8	1.50687e-06	PCDHGA12, DCHS2, PCDHGA10, PCDHGA11, PCDHGC3, PCDHGA4, PCDHGA3, PCDHGB5, PCDHGB4	0.000641722	0.000160469	0.00212103									GOTERM_BP_FAT	GO:0035295~tube development	5	0.0155455	LBX1, HAND2, PAX3, ZIC2, TWIST1	0.999656	0.153074	20.243
Category	Term	Count	PValue	Genes	Bonferroni	Benjamini	FDR	INTERPRO	IPR013164:Cadherin, N-terminal	7	1.98686e-06	PCDHGA12, PCDHGA10, PCDHGA11, PCDHGC3, PCDHGA4, PCDHGA3, PCDHGB5, PCDHGB4	0.000381405	7.62927e-05	0.00247364	Annotation Cluster 8	Enrichment Score: 2.239666212088702							GOTERM_BP_FAT	GO:0001841~neural tube formation	3	0.0159813	PAX3, ZIC2, TWIST1	0.999725	0.154097	20.7512
UP_SEQ_FEATURE	zinc finger region:PHD-type	6	0.00111947	MLL5, SHPRH, BAZ1B, PHF21B, TRIM24, ING1	0.634676	0.634676	1.73055	UP_SEQ_FEATURE	domain:Cadherin 3	8	2.43421e-06	PCDHGA12, DCHS2, PCDHGA10, PCDHGA11, PCDHGC3, PCDHGA4, PCDHGA3, PCDHGB5, PCDHGB4	0.00103644	0.000207374	0.00342631	Category	Term	Count	PValue	Genes	Bonferroni	Benjamini	FDR	GOTERM_BP_FAT	GO:0001838~embryonic epithelial tube formation	3	0.0183946	PAX3, ZIC2, TWIST1	0.999921	0.169141	23.5113
INTERPRO	IPR019787:Zinc finger, PHD-finger	6	0.0133503	MLL5, SHPRH, BAZ1B, PHF21B, TRIM24, ING1	0.998826	0.675185	17.6057	UP_SEQ_FEATURE	domain:Cadherin 4	8	2.43421e-06	PCDHGA12, DCHS2, PCDHGA10, PCDHGA11, PCDHGC3, PCDHGA4, PCDHGA3, PCDHGB5, PCDHGB4	0.00103644	0.000207374	0.00342631	GOTERM_BP_FAT	GO:0030900~forebrain development	12	8.22633e-05	ARX, FEZF2, DLX1, LHX2, EMX2, ZIC5, GRIN1, NEUROG2, POU3F2, NR2F2, IFT88, OTP	0.139976	0.0100026	0.139905	GOTERM_BP_FAT	GO:0035148~tube lumen formation	3	0.0192312	PAX3, ZIC2, TWIST1	0.999949	0.173105	24.4471
INTERPRO	IPR001965:Zinc finger, PHD-type	6	0.0179773	MLL5, SHPRH, BAZ1B, PHF21B, TRIM24, ING1	0.999889	0.72773	23.0014	UP_SEQ_FEATURE	domain:Cadherin 1	8	2.95686e-06	PCDHGA12, DCHS2, PCDHGA10, PCDHGA11, PCDHGC3, PCDHGA4, PCDHGA3, PCDHGB5, PCDHGB4	0.00125883	0.000209915	0.00416195	GOTERM_BP_FAT	GO:0021537~telencephalon development	7	0.00119428	ARX, DLX1, LHX2, EMX2, GRIN1, POU3F2, IFT88	0.888131	0.0682204	2.01312	GOTERM_BP_FAT	GO:0016331~morphogenesis of embryonic epithelium	3	0.0325272	PAX3, ZIC2, TWIST1	1	0.267796	37.9598
INTERPRO	IPR019786:Zinc finger, PHD-type, conserved site	6	0.0179773	MLL5, SHPRH, BAZ1B, PHF21B, TRIM24, ING1	0.999889	0.72773	23.0014	UP_SEQ_FEATURE	domain:Cadherin 2	8	2.95686e-06	PCDHGA12, DCHS2, PCDHGA10, PCDHGA11, PCDHGC3, PCDHGA4, PCDHGA3, PCDHGB5, PCDHGB4	0.00125883	0.000209915	0.00416195	GOTERM_BP_FAT	GO:0021543~pallium development	5	0.0097421	ARX, DLX1, EMX2, GRIN1, POU3F2	1	0.251312	15.3466	GOTERM_BP_FAT	GO:0060562~epithelial tube morphogenesis	3	0.0401965	PAX3, ZIC2, TWIST1	1	0.315922	44.6937
SMART	SM00249:PHD	6	0.0380324	MLL5, SHPRH, BAZ1B, PHF21B, TRIM24, ING1	0.993009	0.808789	36.2564	INTERPRO	IPR002126:Cadherin	8	6.44339e-06	PCDHGA12, DCHS2, PCDHGA10, PCDHGA11, PCDHGC3, PCDHGA4, PCDHGA3, PCDHGB5, PCDHGB4	0.00123637	0.000206168	0.00802181	GOTERM_BP_FAT	GO:0021846~cell proliferation in forebrain	3	0.0125746	ARX, EMX2, POU3F2	1	0.285495	19.3743	GOTERM_BP_FAT	GO:0021915~neural tube development	3	0.0436732	PAX3, ZIC2, TWIST1	1	0.333615	47.5165
								GOTERM_BP_FAT	GO:0007156~homophilic cell adhesion	8	5.85078e-05	PCDHGA12, DCHS2, PCDHGA10, PCDHGA11, PCDHGC3, PCDHGA4, PCDHGA3, PCDHGB5, PCDHGB4	0.0584297	0.00115714	0.0927371	GOTERM_BP_FAT	GO:0021987~cerebral cortex development	4	0.020428	ARX, EMX2, GRIN1, POU3F2	1	0.384321	29.619	GOTERM_BP_FAT	GO:0048598~embryonic morphogenesis	5	0.0532725	TBX15, SIX2, PAX3, ZIC2, TWIST1	1	0.386671	54.6297
Annotation Cluster 7	Enrichment Score: 1.843728583407452							SMART	SM00112:CA	8	6.38442e-05	PCDHGA12, DCHS2, PCDHGA10, PCDHGA11, PCDHGC3, PCDHGA4, PCDHGA3, PCDHGB5, PCDHGB4	0.00344176	0.00172236	0.0625277	GOTERM_BP_FAT	GO:0021761~limbic system development	4	0.0222974	DLX1, EMX2, POU3F2, OTP	1	0.399679	31.8701	GOTERM_BP_FAT	GO:0002009~morphogenesis of an epithelium	3	0.0808468	PAX3, ZIC2, TWIST1	1	0.499474	70.3893
Category	Term	Count	PValue	Genes	Bonferroni	Benjamini	FDR	GOTERM_BP_FAT	GO:0016337~cell-cell adhesion	9	0.00113585	PCDHGA12, DCHS2, PCDHGA10, PCDHGA11, PCDHGC3, SOX9, PCDHGA4, PCDHGA3, PCDHGB5, PCDHGB4	0.689462	0.0150729	1.78602	GOTERM_BP_FAT	GO:0021885~forebrain cell migration	3	0.0383176	ARX, EMX2, POU3F2	1	0.544792	48.5683	GOTERM_BP_FAT	GO:0048729~tissue morphogenesis	3	0.18348	PAX3, ZIC2, TWIST1	1	0.780696	94.6407
GOTERM_BP_FAT	GO:0043066~negative regulation of apoptosis	13	0.00912758	CFLAR, ZC3HC1, SOX4, GDNF, GCLM, NOTCH1, BCL2, POU3F3, FOXC1, HSPA5, FAS, CLN8, MYC	1	0.254543	14.3859	SP_PIR_KEYWORDS	cell adhesion	8	0.0123136	PCDHGA12, DCHS2, PCDHGA10, PCDHGA11, PCDHGC3, PCDHGA4, PCDHGA3, PCDHGB5, PCDHGB4	0.878313	0.104934	14.0287									GOTERM_BP_FAT	GO:0048568~embryonic organ development	3	0.192469	TBX15, SIX2, FOXD3	1	0.793399	95.4322
GOTERM_BP_FAT	GO:0043069~negative regulation of programmed cell death	13	0.0102454	CFLAR, ZC3HC1, SOX4, GDNF, GCLM, NOTCH1, BCL2, POU3F3, FOXC1, HSPA5, FAS, CLN8, MYC	1	0.268644	16.0073	GOTERM_BP_FAT	GO:0007155~cell adhesion	11	0.0381143	PCDHGA12, DCHS2, COL9A1, PCDHGA10, PCDHGA11, PCDHGC3, SOX9, PCDHGA4, PCDHGA3, COL5A1, PCDHGB5, PCDHGB4	1	0.279464	46.0012	Annotation Cluster 9	Enrichment Score: 1.997019230913266							GOTERM_BP_FAT	GO:0007507~heart development	3	0.236306	LBX1, HAND2, PAX3	1	0.835613	97.9594
GOTERM_BP_FAT	GO:0060548~negative regulation of cell death	13	0.0106624	CFLAR, ZC3HC1, SOX4, GDNF, GCLM, NOTCH1, BCL2, POU3F3, FOXC1, HSPA5, FAS, CLN8, MYC	1	0.270065	16.6047	GOTERM_BP_FAT	GO:0022610~biological adhesion	11	0.0384286	PCDHGA12, DCHS2, COL9A1, PCDHGA10, PCDHGA11, PCDHGC3, SOX9, PCDHGA4, PCDHGA3, COL5A1, PCDHGB5, PCDHGB4	1	0.279513	46.2803	Category	Term	Count	PValue	Genes	Bonferroni	Benjamini	FDR	GOTERM_BP_FAT	GO:0016265~death	4	0.590554	HAND2, NR4A2, PAX3, TWIST1	1	0.99164	99.9997
GOTERM_BP_FAT	GO:0042981~regulation of apoptosis	22	0.0132589	CFLAR, ZC3HC1, HOXA13, TBX5, TUBB2C, SOX4, GCLM, GLI3, GDNF, NOTCH1, MAP3K5, CDKN1B, RASGRF1, BCL2, POU3F3, PCSK9, FOXC1, FAS, HSPA5, CLN8, MYC, MAP3K11	1	0.27866	20.2355	SP_PIR_KEYWORDS	calcium	10	0.0469121	PCDHGA12, DCHS2, PCDHGA10, PCDHGA11, TPO, PCDHGC3, CACNA1F, PCDHGA4, PCDHGA3, PCDHGB5, PCDHGB4	0.999716	0.31015	44.3551	UP_SEQ_FEATURE	domain:SET	5	0.00734823	PRDM13, PRDM12, PRDM15, SETD6, PRDM16	0.997991	0.873817	10.7718	GOTERM_BP_FAT	GO:0006915~apoptosis	3	0.72232	HAND2, PAX3, TWIST1	1	0.998529	100
GOTERM_BP_FAT	GO:0043067~regulation of programmed cell death	22	0.0149467	CFLAR, ZC3HC1, HOXA13, TBX5, TUBB2C, SOX4, GCLM, GLI3, GDNF, NOTCH1, MAP3K5, CDKN1B, RASGRF1, BCL2, POU3F3, PCSK9, FOXC1, FAS, HSPA5, CLN8, MYC, MAP3K11	1	0.294707	22.5153	SP_PIR_KEYWORDS	cell membrane	17	0.214608	PCDHGA12, DHH, PCDHGA10, TM7SF4, PCDHGA11, GRIK2, PLVAP, PCDHGC3, PCDHGA4, NRN1, PCDHGA3, PCDHGB5, PCDHGB4, SLC16A3, HRH3, RASL10A, EPN1, ISLR2	1	0.757345	94.7511	INTERPRO	IPR001214:SET	5	0.00852266	PRDM13, PRDM12, PRDM15, SETD6, PRDM16	0.988129	0.588	11.6504	GOTERM_BP_FAT	GO:0012501~programmed cell death	3	0.730493	HAND2, PAX3, TWIST1	1	0.99865	100
GOTERM_BP_FAT	GO:0010941~regulation of cell death	22	0.0156219	CFLAR, ZC3HC1, HOXA13, TBX5, TUBB2C, SOX4, GCLM, GLI3, GDNF, NOTCH1, MAP3K5, CDKN1B, RASGRF1, BCL2, POU3F3, PCSK9, FOXC1, FAS, HSPA5, CLN8, MYC, MAP3K11	1	0.299304	23.4101	GOTERM_MF_FAT	GO:0005509~calcium ion binding	10	0.229153	PCDHGA12, DCHS2, PCDHGA10, PCDHGA11, TPO, PCDHGC3, CACNA1F, PCDHGA4, PCDHGA3, PCDHGB5, PCDHGB4	1	0.877228	95.3075	SMART	SM00317:SET	5	0.0162999	PRDM13, PRDM12, PRDM15, SETD6, PRDM16	0.877981	0.650687	17.3748	GOTERM_BP_FAT	GO:0008219~cell death	3	0.811646	HAND2, PAX3, TWIST1	1	0.999759	100
GOTERM_BP_FAT	GO:0006916~anti-apoptosis	8	0.0402135	CFLAR, ZC3HC1, BCL2, FOXC1, FAS, HSPA5, GDNF, MYC	1	0.481832	50.1047
								Annotation Cluster 10	Enrichment Score: 3.3421373546130124							Annotation Cluster 10	Enrichment Score: 1.9295142583582834							Annotation Cluster 10	Enrichment Score: 1.1888146721838049
Annotation Cluster 8	Enrichment Score: 1.8208563976953938							Category	Term	Count	PValue	Genes	Bonferroni	Benjamini	FDR	Category	Term	Count	PValue	Genes	Bonferroni	Benjamini	FDR	Category	Term	Count	PValue	Genes	Bonferroni	Benjamini	FDR
Category	Term	Count	PValue	Genes	Bonferroni	Benjamini	FDR	INTERPRO	IPR001092:Basic helix-loop-helix dimerisation region bHLH	8	9.21074e-06	TCF21, HELT, EPAS1, EBF2, EBF1, OLIG2, MXD1, SIM1	0.00176691	0.000252607	0.0114669	GOTERM_BP_FAT	GO:0007389~pattern specification process	14	0.00114965	EGR2, CDX2, MAFB, HOXA11, EMX2, SEMA5A, DLX1, HOXA3, LHX2, FOXF1, BCOR, NR2F2, IFT88, PCSK5	0.878582	0.0678707	1.93857	GOTERM_BP_FAT	GO:0045893~positive regulation of transcription, DNA-dependent	11	4.17224e-05	MEIS2, PAX9, HAND2, ONECUT2, NR4A2, SIX2, PAX3, PRDM16, NKX2-2, WT1, FOXD3	0.0210132	0.0017682	0.0602158
GOTERM_BP_FAT	GO:0030182~neuron differentiation	20	0.000171896	FOXA2, PTPRZ1, FOXA1, DPYSL5, PAX6, RPL24, GLI3, GDNF, DLX2, NOTCH1, SEMA6C, RASGRF1, BCL2, GBX2, NR2F6, PCSK9, LHX5, CHRNB2, TLX3, CLN8	0.261332	0.0166874	0.290773	SMART	SM00353:HLH	8	9.00546e-05	TCF21, HELT, EPAS1, EBF2, EBF1, OLIG2, MXD1, SIM1	0.00485136	0.00161974	0.0881875	GOTERM_BP_FAT	GO:0003002~regionalization	10	0.0109849	DLX1, HOXA3, EGR2, MAFB, LHX2, HOXA11, EMX2, NR2F2, PCSK5, IFT88	1	0.267644	17.1367	GOTERM_BP_FAT	GO:0051254~positive regulation of RNA metabolic process	11	4.5134e-05	MEIS2, PAX9, HAND2, ONECUT2, NR4A2, SIX2, PAX3, PRDM16, NKX2-2, WT1, FOXD3	0.0227119	0.00176565	0.0651381
GOTERM_BP_FAT	GO:0000904~cell morphogenesis involved in differentiation	12	0.00297908	NOTCH1, SEMA6C, PTPRZ1, BCL2, PAX6, GBX2, DPYSL5, CHRNB2, RPL24, ANTXR1, NFATC1, FN1	0.994789	0.147261	4.92815	UP_SEQ_FEATURE	DNA-binding region:Basic motif	7	0.000391328	TCF21, HELT, EPAS1, OLIG2, MXD1, ATF1, SIM1	0.153579	0.0165356	0.54942	GOTERM_BP_FAT	GO:0009952~anterior/posterior pattern formation	6	0.128853	HOXA3, HOXA11, EMX2, NR2F2, PCSK5, IFT88	1	0.835705	90.4398	GOTERM_MF_FAT	GO:0016563~transcription activator activity	5	0.121508	HAND2, NR4A2, PAX3, PRDM16, WT1	1	0.878736	77.0833
GOTERM_BP_FAT	GO:0000902~cell morphogenesis	14	0.00663351	SHROOM3, PTPRZ1, DPYSL5, PAX6, RPL24, NOTCH1, SEMA6C, BCL2, GBX2, CHRNB2, MAP7, ANTXR1, FN1, NFATC1	0.999992	0.229414	10.6615	UP_SEQ_FEATURE	domain:Helix-loop-helix motif	6	0.000581336	TCF21, HELT, EPAS1, OLIG2, MXD1, SIM1	0.219422	0.0222684	0.815176									GOTERM_CC_FAT	GO:0044451~nucleoplasm part	4	0.202838	LBX1, HAND2, PRDM16, WT1	1	0.923406	90.2918
GOTERM_BP_FAT	GO:0031175~neuron projection development	11	0.0119928	NOTCH1, SEMA6C, PTPRZ1, RASGRF1, BCL2, PAX6, GBX2, DPYSL5, CHRNB2, RPL24, GDNF	1	0.278962	18.4841	INTERPRO	IPR011598:Helix-loop-helix DNA-binding	3	0.103168	TCF21, OLIG2, MXD1	1	0.729272	74.2222	Annotation Cluster 11	Enrichment Score: 1.7502666191052303							GOTERM_MF_FAT	GO:0008134~transcription factor binding	5	0.215998	PHOX2B, MEIS2, HAND2, SOX17, PRDM16	1	0.954149	93.7179
GOTERM_BP_FAT	GO:0032989~cellular component morphogenesis	14	0.0130135	SHROOM3, PTPRZ1, DPYSL5, PAX6, RPL24, NOTCH1, SEMA6C, BCL2, GBX2, CHRNB2, MAP7, ANTXR1, FN1, NFATC1	1	0.277526	19.8988									Category	Term	Count	PValue	Genes	Bonferroni	Benjamini	FDR	GOTERM_MF_FAT	GO:0003712~transcription cofactor activity	4	0.235165	PHOX2B, MEIS2, HAND2, PRDM16	1	0.952938	95.2591
GOTERM_BP_FAT	GO:0007409~axonogenesis	9	0.018415	NOTCH1, SEMA6C, PTPRZ1, BCL2, PAX6, GBX2, DPYSL5, CHRNB2, RPL24	1	0.335932	27.0091	Annotation Cluster 11	Enrichment Score: 3.233207557726294							UP_SEQ_FEATURE	domain:LIM zinc-binding 2	5	0.00794145	ABLIM2, ISL2, LIMK2, LHX2, LHX9	0.998785	0.813318	11.5923	GOTERM_CC_FAT	GO:0031981~nuclear lumen	6	0.382896	LBX1, MEIS2, HAND2, PRDM16, NKX2-2, WT1	1	0.990807	99.303
GOTERM_BP_FAT	GO:0030030~cell projection organization	13	0.0211986	PTPRZ1, DPYSL5, PAX6, RPL24, GDNF, LPIN1, CD2AP, NOTCH1, SEMA6C, RASGRF1, BCL2, GBX2, CHRNB2	1	0.348851	30.4371	Category	Term	Count	PValue	Genes	Bonferroni	Benjamini	FDR	UP_SEQ_FEATURE	domain:LIM zinc-binding 1	5	0.00794145	ABLIM2, ISL2, LIMK2, LHX2, LHX9	0.998785	0.813318	11.5923	GOTERM_CC_FAT	GO:0005654~nucleoplasm	4	0.461543	LBX1, HAND2, PRDM16, WT1	1	0.994815	99.8285
GOTERM_BP_FAT	GO:0048667~cell morphogenesis involved in neuron differentiation	9	0.0266249	NOTCH1, SEMA6C, PTPRZ1, BCL2, PAX6, GBX2, DPYSL5, CHRNB2, RPL24	1	0.390613	36.6887	GOTERM_BP_FAT	GO:0060284~regulation of cell development	11	3.25083e-06	DLX2, ISL2, BDNF, TBX3, HOXD3, BARHL2, LMX1A, PROX1, NKX2-5, WNT7A, NKX2-2	0.00333952	0.000104529	0.00515481	SP_PIR_KEYWORDS	LIM domain	5	0.0218922	ABLIM2, ISL2, LIMK2, LHX2, LHX9	0.999123	0.443778	25.8012	GOTERM_CC_FAT	GO:0070013~intracellular organelle lumen	6	0.570403	LBX1, MEIS2, HAND2, PRDM16, NKX2-2, WT1	1	0.996802	99.9832
GOTERM_BP_FAT	GO:0048666~neuron development	12	0.0271431	NOTCH1, SEMA6C, PTPRZ1, RASGRF1, BCL2, PAX6, GBX2, DPYSL5, NR2F6, CHRNB2, RPL24, GDNF	1	0.390288	37.2573	GOTERM_BP_FAT	GO:0051960~regulation of nervous system development	10	1.4238e-05	DLX2, ISL2, BDNF, LHX1, HOXD3, BARHL2, LMX1A, NKX2-5, WNT7A, NKX2-2	0.0145442	0.000375597	0.0225753	INTERPRO	IPR001781:Zinc finger, LIM-type	5	0.0265659	ABLIM2, ISL2, LIMK2, LHX2, LHX9	0.999999	0.863641	32.2714	GOTERM_CC_FAT	GO:0043233~organelle lumen	6	0.585664	LBX1, MEIS2, HAND2, PRDM16, NKX2-2, WT1	1	0.995689	99.9884
GOTERM_BP_FAT	GO:0048812~neuron projection morphogenesis	9	0.0295799	NOTCH1, SEMA6C, PTPRZ1, BCL2, PAX6, GBX2, DPYSL5, CHRNB2, RPL24	1	0.407748	39.8668	GOTERM_BP_FAT	GO:0050767~regulation of neurogenesis	9	3.57854e-05	DLX2, ISL2, BDNF, HOXD3, BARHL2, LMX1A, NKX2-5, WNT7A, NKX2-2	0.0361541	0.000751224	0.0567308	SMART	SM00132:LIM	5	0.0483342	ABLIM2, ISL2, LIMK2, LHX2, LHX9	0.998238	0.795118	43.7486	GOTERM_CC_FAT	GO:0031974~membrane-enclosed lumen	6	0.601817	LBX1, MEIS2, HAND2, PRDM16, NKX2-2, WT1	1	0.991907	99.9923
GOTERM_BP_FAT	GO:0048858~cell projection morphogenesis	9	0.0576756	NOTCH1, SEMA6C, PTPRZ1, BCL2, PAX6, GBX2, DPYSL5, CHRNB2, RPL24	1	0.552991	63.4417	GOTERM_BP_FAT	GO:0045664~regulation of neuron differentiation	8	6.44213e-05	ISL2, BDNF, HOXD3, BARHL2, LMX1A, NKX2-5, WNT7A, NKX2-2	0.0641421	0.00122687	0.102106
GOTERM_BP_FAT	GO:0032990~cell part morphogenesis	9	0.0718332	NOTCH1, SEMA6C, PTPRZ1, BCL2, PAX6, GBX2, DPYSL5, CHRNB2, RPL24	1	0.603458	71.7106	GOTERM_BP_FAT	GO:0045596~negative regulation of cell differentiation	9	0.000224797	DLX2, ISL2, BDNF, TBX3, LMX1A, SOX9, PRDM16, NKX2-5, NKX2-2	0.206532	0.00344692	0.355873	Annotation Cluster 12	Enrichment Score: 1.5672491112137408							Annotation Cluster 11	Enrichment Score: 1.057969643146512
GOTERM_BP_FAT	GO:0007411~axon guidance	5	0.116338	SEMA6C, PAX6, GBX2, DPYSL5, RPL24	1	0.718326	87.6929	GOTERM_BP_FAT	GO:0045666~positive regulation of neuron differentiation	4	0.000750721	BDNF, HOXD3, NKX2-5, NKX2-2	0.538273	0.0105302	1.18382	Category	Term	Count	PValue	Genes	Bonferroni	Benjamini	FDR	Category	Term	Count	PValue	Genes	Bonferroni	Benjamini	FDR
								GOTERM_BP_FAT	GO:0051094~positive regulation of developmental process	7	0.0186146	BDNF, HOXD3, GATA4, PROX1, NKX2-5, WNT7A, NKX2-2	1	0.158554	25.7668	GOTERM_BP_FAT	GO:0001764~neuron migration	7	0.00100103	ARX, CTTNBP2, ATOH1, BARHL2, NR4A2, NEUROG2, NR2F2	0.840516	0.0634615	1.68998	GOTERM_CC_FAT	GO:0044420~extracellular matrix part	3	0.0297954	COL9A1, COL9A2, VWC2	0.872148	0.872148	26.7423
Annotation Cluster 9	Enrichment Score: 1.783679987390713							GOTERM_BP_FAT	GO:0035270~endocrine system development	3	0.0954559	HOXD3, NKX2-5, NKX2-2	1	0.514178	79.6251	GOTERM_BP_FAT	GO:0021954~central nervous system neuron development	3	0.116447	ARX, NR4A2, NEUROG2	1	0.81613	87.8387	SP_PIR_KEYWORDS	extracellular matrix	4	0.0314414	COL9A1, COL9A2, WNT16, VWC2	0.97694	0.290146	30.6224
Category	Term	Count	PValue	Genes	Bonferroni	Benjamini	FDR	GOTERM_BP_FAT	GO:0045597~positive regulation of cell differentiation	4	0.248901	BDNF, HOXD3, NKX2-5, NKX2-2	1	0.832196	98.9312	GOTERM_BP_FAT	GO:0021953~central nervous system neuron differentiation	3	0.170481	ARX, NR4A2, NEUROG2	1	0.893462	95.845	GOTERM_CC_FAT	GO:0005578~proteinaceous extracellular matrix	4	0.0331139	COL9A1, COL9A2, WNT16, VWC2	0.89872	0.681755	29.2795
GOTERM_BP_FAT	GO:0030856~regulation of epithelial cell differentiation	4	0.0062607	CCND1, NOTCH1, CDKN2B, PAX6	0.999984	0.231625	10.0919																	GOTERM_MF_FAT	GO:0005201~extracellular matrix structural constituent	3	0.039692	COL9A1, COL9A2, WNT16	0.990119	0.602845	36.9099
GOTERM_BP_FAT	GO:0030858~positive regulation of epithelial cell differentiation	3	0.00864358	NOTCH1, CDKN2B, PAX6	1	0.254841	13.6748	Annotation Cluster 12	Enrichment Score: 3.176446419501471							Annotation Cluster 13	Enrichment Score: 1.532429951144295							GOTERM_CC_FAT	GO:0031012~extracellular matrix	4	0.0415684	COL9A1, COL9A2, WNT16, VWC2	0.944261	0.61801	35.3891
GOTERM_BP_FAT	GO:0050678~regulation of epithelial cell proliferation	4	0.0823462	NOTCH1, CDKN1B, CDKN2B, PAX6	1	0.633137	76.6748	Category	Term	Count	PValue	Genes	Bonferroni	Benjamini	FDR	Category	Term	Count	PValue	Genes	Bonferroni	Benjamini	FDR	GOTERM_CC_FAT	GO:0044421~extracellular region part	5	0.107009	COL9A1, COL9A2, WNT16, VWC2, IFNA8	0.999545	0.853984	68.7875
								GOTERM_BP_FAT	GO:0030902~hindbrain development	6	8.6792e-05	PHOX2A, LMX1B, LHX1, LMX1A, TBR1, WNT7A	0.0854406	0.00153869	0.13754	GOTERM_MF_FAT	GO:0016564~transcription repressor activity	14	0.00292587	CDX2, RSF1, FOXK1, TAF7, L3MBTL, PRDM16, KCNIP3, ATF3, ID2, FOXE1, BCOR, NFIL3, NR2F2, APEX1	0.693882	0.210817	4.01029	GOTERM_CC_FAT	GO:0005576~extracellular region	7	0.131675	COL9A1, COL9A2, WNT16, TEPP, VWC2, KLK10, IFNA8	0.999932	0.853418	76.6018
Annotation Cluster 10	Enrichment Score: 1.7584256952277018							GOTERM_BP_FAT	GO:0009953~dorsal/ventral pattern formation	6	8.6792e-05	GSC, LMX1B, LHX1, PAX7, LHX2, WNT7A	0.0854406	0.00153869	0.13754	GOTERM_MF_FAT	GO:0003712~transcription cofactor activity	13	0.0221827	CDX2, TAF7, PRDM16, KCNIP3, ATF3, VGLL2, SUPT7L, CARM1, NFIL3, NR2F2, BCOR, SMARCA2, APEX1	0.999884	0.77919	26.9	SP_PIR_KEYWORDS	Secreted	7	0.185402	COL9A1, COL9A2, WNT16, TEPP, VWC2, KLK10, IFNA8	1	0.80074	90.4325
Category	Term	Count	PValue	Genes	Bonferroni	Benjamini	FDR	GOTERM_BP_FAT	GO:0022037~metencephalon development	5	0.000133278	PHOX2A, LMX1B, LHX1, LMX1A, WNT7A	0.128162	0.00224587	0.211133	GOTERM_MF_FAT	GO:0008134~transcription factor binding	16	0.032177	CDX2, MAFB, TAF7, CENPF, PRDM16, KCNIP3, ATF3, JUN, VGLL2, SUPT7L, BCOR, CARM1, NFIL3, NR2F2, SMARCA2, APEX1	0.999998	0.848566	36.6722	SP_PIR_KEYWORDS	signal	12	0.202506	COL9A1, COL9A2, WNT16, LYPD3, LRP1B, LRRTM1, TEPP, VWC2, PCDHGA7, KLK10, IFNA8, NPR3	1	0.792092	92.4954
GOTERM_CC_FAT	GO:0043228~non-membrane-bounded organelle	50	0.00698111	VAPA, RBM15B, TUBB2C, RBM4, PDLIM3, CBX8, GLI3, CD2AP, TTLL1, FUBP1, ARHGAP21, SPRY2, HIST2H2AC, DYNC1H1, MYC, ELP3, RBBP4, ANKRA2, NAV1, BAZ1B, FOXC1, NUP107, EP400, MAP3K11, HIST1H2AB, SDCCAG8, SHROOM3, FKBP4, GLIS1, CETN3, ZNF174, DAZAP1, RPS26, RGS12, APEX1, SHPRH, CSTF2, EPB41, BFSP1, MPHOSPH10, NUF2, GAS2, RPL24, SSB, DPYSL2, TRIM24, CDC25B, FAAH, MAP7, POP4	0.851255	0.851255	8.8092	PIR_SUPERFAMILY	PIRSF002642:transcription factor isl-1	3	0.000196661	ISL2, LMX1B, LMX1A	0.0101752	0.0101752	0.190905	GOTERM_MF_FAT	GO:0003714~transcription corepressor activity	7	0.0389751	ATF3, CDX2, BCOR, NR2F2, NFIL3, APEX1, KCNIP3	1	0.799332	42.6105	UP_SEQ_FEATURE	signal peptide	12	0.203335	COL9A1, COL9A2, WNT16, LYPD3, LRP1B, LRRTM1, TEPP, VWC2, PCDHGA7, KLK10, IFNA8, NPR3	1	0.999258	95.3263
GOTERM_CC_FAT	GO:0043232~intracellular non-membrane-bounded organelle	50	0.00698111	VAPA, RBM15B, TUBB2C, RBM4, PDLIM3, CBX8, GLI3, CD2AP, TTLL1, FUBP1, ARHGAP21, SPRY2, HIST2H2AC, DYNC1H1, MYC, ELP3, RBBP4, ANKRA2, NAV1, BAZ1B, FOXC1, NUP107, EP400, MAP3K11, HIST1H2AB, SDCCAG8, SHROOM3, FKBP4, GLIS1, CETN3, ZNF174, DAZAP1, RPS26, RGS12, APEX1, SHPRH, CSTF2, EPB41, BFSP1, MPHOSPH10, NUF2, GAS2, RPL24, SSB, DPYSL2, TRIM24, CDC25B, FAAH, MAP7, POP4	0.851255	0.851255	8.8092	UP_SEQ_FEATURE	domain:LIM zinc-binding 1	5	0.000216305	ISL2, LMX1B, LHX1, LHX2, LMX1A	0.0880369	0.0101873	0.304037	GOTERM_MF_FAT	GO:0016563~transcription activator activity	13	0.050404	RSF1, FOXK1, TAF7, NR4A2, PRDM16, FOXF1, PAX8, VGLL2, TFAP2D, SUPT7L, CARM1, SMARCA2, APEX1	1	0.850355	51.4424	GOTERM_MF_FAT	GO:0005198~structural molecule activity	4	0.41833	COL9A1, COL9A2, WNT16, ACTA1	1	0.994187	99.7893
GOTERM_CC_FAT	GO:0005856~cytoskeleton	24	0.108861	SDCCAG8, SHROOM3, ANKRA2, VAPA, EPB41, TUBB2C, BFSP1, CETN3, PDLIM3, GAS2, DPYSL2, TTLL1, CD2AP, ZNF174, CDC25B, ARHGAP21, SPRY2, NAV1, FAAH, MAP7, DYNC1H1, MYC, APEX1, MAP3K11	1	0.859048	78.0659	UP_SEQ_FEATURE	domain:LIM zinc-binding 2	5	0.000216305	ISL2, LMX1B, LHX1, LHX2, LMX1A	0.0880369	0.0101873	0.304037	GOTERM_MF_FAT	GO:0003713~transcription coactivator activity	7	0.155723	TAF7, VGLL2, SUPT7L, CARM1, PRDM16, APEX1, SMARCA2	1	0.948868	90.6
								SP_PIR_KEYWORDS	LIM domain	5	0.00081041	ISL2, LMX1B, LHX1, LHX2, LMX1A	0.128749	0.010546	0.984213									Annotation Cluster 12	Enrichment Score: 0.9396542325318493
Annotation Cluster 11	Enrichment Score: 1.6500653127644669							INTERPRO	IPR001781:Zinc finger, LIM-type	5	0.00128955	ISL2, LMX1B, LHX1, LHX2, LMX1A	0.219448	0.0304945	1.59371	Annotation Cluster 14	Enrichment Score: 1.5322371661130405							Category	Term	Count	PValue	Genes	Bonferroni	Benjamini	FDR
Category	Term	Count	PValue	Genes	Bonferroni	Benjamini	FDR	GOTERM_BP_FAT	GO:0021549~cerebellum development	4	0.00145732	LMX1B, LHX1, LMX1A, WNT7A	0.777022	0.0188167	2.28607	Category	Term	Count	PValue	Genes	Bonferroni	Benjamini	FDR	GOTERM_BP_FAT	GO:0001568~blood vessel development	4	0.0806862	CDX4, HAND2, SOX17, WT1	1	0.504399	70.3146
GOTERM_BP_FAT	GO:0021554~optic nerve development	3	0.00320066	CHRNB2, RPL24, GLI3	0.996478	0.153069	5.28543	SMART	SM00132:LIM	5	0.00476876	ISL2, LMX1B, LHX1, LHX2, LMX1A	0.227505	0.0624942	4.57496	GOTERM_BP_FAT	GO:0045637~regulation of myeloid cell differentiation	6	0.00585463	ID2, MAFB, JUN, L3MBTL, GNAS, PRDM16	0.999979	0.180709	9.50972	GOTERM_BP_FAT	GO:0001944~vasculature development	4	0.0862825	CDX4, HAND2, SOX17, WT1	1	0.517624	72.8193
GOTERM_BP_FAT	GO:0021545~cranial nerve development	3	0.0462972	CHRNB2, RPL24, GLI3	1	0.513266	55.1996	GOTERM_BP_FAT	GO:0021587~cerebellum morphogenesis	3	0.00885461	LMX1B, LHX1, WNT7A	0.999894	0.090036	13.1541	GOTERM_BP_FAT	GO:0002761~regulation of myeloid leukocyte differentiation	4	0.0284463	ID2, JUN, GNAS, PRDM16	1	0.467269	38.806	GOTERM_BP_FAT	GO:0048514~blood vessel morphogenesis	3	0.217929	HAND2, SOX17, WT1	1	0.828336	97.1236
GOTERM_BP_FAT	GO:0021675~nerve development	3	0.0756849	CHRNB2, RPL24, GLI3	1	0.608192	73.6347	GOTERM_BP_FAT	GO:0021575~hindbrain morphogenesis	3	0.012847	LMX1B, LHX1, WNT7A	0.999998	0.122294	18.5384	GOTERM_BP_FAT	GO:0002763~positive regulation of myeloid leukocyte differentiation	3	0.0383176	ID2, JUN, GNAS	1	0.544792	48.5683
																GOTERM_BP_FAT	GO:0045639~positive regulation of myeloid cell differentiation	3	0.116447	ID2, JUN, GNAS	1	0.81613	87.8387	Annotation Cluster 13	Enrichment Score: 0.9380121535199919
Annotation Cluster 12	Enrichment Score: 1.6152646310964354							Annotation Cluster 13	Enrichment Score: 2.7832221389176905															Category	Term	Count	PValue	Genes	Bonferroni	Benjamini	FDR
Category	Term	Count	PValue	Genes	Bonferroni	Benjamini	FDR	Category	Term	Count	PValue	Genes	Bonferroni	Benjamini	FDR	Annotation Cluster 15	Enrichment Score: 1.4925230572133652							GOTERM_BP_FAT	GO:0030182~neuron differentiation	9	0.000848805	FEZF2, LBX1, BARHL2, ONECUT2, NR4A2, EN2, VAX1, PAX3, NKX2-2	0.350937	0.0213794	1.21842
GOTERM_BP_FAT	GO:0048598~embryonic morphogenesis	14	0.00225703	SHROOM3, FOXA2, HOXA13, TBX5, NR4A3, GLI3, HOXD11, SPRY2, DLX2, NOTCH1, GBX2, ROR2, FOXC1, MYC	0.98134	0.124284	3.75514	GOTERM_BP_FAT	GO:0001822~kidney development	7	8.48954e-05	TCF21, ODC1, BDNF, HOXC11, LHX1, PROX1, WT1	0.0836539	0.00153148	0.134536	Category	Term	Count	PValue	Genes	Bonferroni	Benjamini	FDR	GOTERM_BP_FAT	GO:0048666~neuron development	5	0.0682422	FEZF2, ONECUT2, NR4A2, EN2, VAX1	1	0.456532	63.9552
GOTERM_BP_FAT	GO:0007423~sensory organ development	11	0.00330442	SPRY2, CDKN1B, BCL2, PAX6, GBX2, FOXC1, RPL24, NR4A3, CLN8, MYC, GLI3	0.997068	0.14956	5.45229	GOTERM_BP_FAT	GO:0001655~urogenital system development	7	0.000180184	TCF21, ODC1, BDNF, HOXC11, LHX1, PROX1, WT1	0.16925	0.0028931	0.285341	GOTERM_BP_FAT	GO:0051270~regulation of cell motion	11	0.00164786	LAMA2, PTPRK, CDH13, CDKN1B, SMAD7, MMP9, ONECUT2, JAK2, F7, INSR, TPM1	0.951346	0.0850741	2.76764	GOTERM_BP_FAT	GO:0032989~cellular component morphogenesis	5	0.0985572	FEZF2, ACTA1, ONECUT2, NR4A2, VAX1	1	0.561855	77.6404
GOTERM_BP_FAT	GO:0048568~embryonic organ development	9	0.00965875	CEBPA, SPRY2, DLX2, GBX2, ROR2, NR4A3, MYC, GLI3, FOXD3	1	0.263159	15.16	GOTERM_BP_FAT	GO:0001656~metanephros development	5	0.00032804	TCF21, BDNF, HOXC11, LHX1, WT1	0.286525	0.00474376	0.518916	GOTERM_BP_FAT	GO:0030334~regulation of cell migration	10	0.00240057	LAMA2, PTPRK, CDH13, SMAD7, MMP9, ONECUT2, JAK2, F7, INSR, TPM1	0.98779	0.0973805	4.00771	GOTERM_BP_FAT	GO:0048858~cell projection morphogenesis	4	0.104028	FEZF2, ONECUT2, NR4A2, VAX1	1	0.571363	79.5215
GOTERM_BP_FAT	GO:0043583~ear development	6	0.0204263	SPRY2, CDKN1B, BCL2, GBX2, NR4A3, MYC	1	0.354751	29.5016	GOTERM_BP_FAT	GO:0001657~ureteric bud development	3	0.0284997	TCF21, BDNF, LHX1	1	0.222862	36.7764	GOTERM_BP_FAT	GO:0040012~regulation of locomotion	10	0.00422849	LAMA2, PTPRK, CDH13, SMAD7, MMP9, ONECUT2, JAK2, F7, INSR, TPM1	0.999577	0.14388	6.95748	GOTERM_BP_FAT	GO:0032990~cell part morphogenesis	4	0.115536	FEZF2, ONECUT2, NR4A2, VAX1	1	0.606514	83.0079
GOTERM_BP_FAT	GO:0048562~embryonic organ morphogenesis	7	0.0269313	SPRY2, DLX2, GBX2, ROR2, NR4A3, MYC, GLI3	1	0.390986	37.0255	GOTERM_BP_FAT	GO:0030855~epithelial cell differentiation	4	0.0848244	TCF21, FZD1, PROX1, WT1	1	0.483635	75.4775	GOTERM_BP_FAT	GO:0030335~positive regulation of cell migration	6	0.0174386	CDH13, MMP9, ONECUT2, JAK2, F7, INSR	1	0.353233	25.873	GOTERM_BP_FAT	GO:0000902~cell morphogenesis	4	0.218938	FEZF2, ONECUT2, NR4A2, VAX1	1	0.825681	97.1767
GOTERM_BP_FAT	GO:0042471~ear morphogenesis	4	0.092906	SPRY2, GBX2, NR4A3, MYC	1	0.660599	80.8274									GOTERM_BP_FAT	GO:0040017~positive regulation of locomotion	6	0.0202512	CDH13, MMP9, ONECUT2, JAK2, F7, INSR	1	0.385553	29.4025	GOTERM_BP_FAT	GO:0007409~axonogenesis	3	0.228941	FEZF2, NR4A2, VAX1	1	0.832758	97.6561
GOTERM_BP_FAT	GO:0048839~inner ear development	4	0.140086	SPRY2, CDKN1B, GBX2, NR4A3	1	0.747882	92.2421	Annotation Cluster 14	Enrichment Score: 2.5977403908149546							GOTERM_BP_FAT	GO:0051272~positive regulation of cell motion	6	0.0267308	CDH13, MMP9, ONECUT2, JAK2, F7, INSR	1	0.454287	36.941	GOTERM_BP_FAT	GO:0030030~cell projection organization	4	0.236061	FEZF2, ONECUT2, NR4A2, VAX1	1	0.839173	97.9499
GOTERM_BP_FAT	GO:0042472~inner ear morphogenesis	3	0.231975	SPRY2, GBX2, NR4A3	1	0.86062	98.8561	Category	Term	Count	PValue	Genes	Bonferroni	Benjamini	FDR	GOTERM_BP_FAT	GO:0048584~positive regulation of response to stimulus	8	0.0290579	AGTR1, CDH13, CD247, CRH, MALT1, JAK2, F7, GHSR	1	0.470546	39.4583	GOTERM_BP_FAT	GO:0048667~cell morphogenesis involved in neuron differentiation	3	0.252928	FEZF2, NR4A2, VAX1	1	0.850855	98.5148
								GOTERM_BP_FAT	GO:0035295~tube development	10	4.17574e-05	TCF21, BDNF, TBX3, EPAS1, LHX1, GATA4, TFAP2A, PROX1, NKX2-5, ZIC2	0.0420592	0.000859017	0.0661954	GOTERM_CC_FAT	GO:0005901~caveola	3	0.183169	CDH13, JAK2, INSR	1	0.964901	93.2854	GOTERM_BP_FAT	GO:0048812~neuron projection morphogenesis	3	0.26033	FEZF2, NR4A2, VAX1	1	0.853191	98.7136
Annotation Cluster 13	Enrichment Score: 1.5574975332776086							GOTERM_BP_FAT	GO:0048729~tissue morphogenesis	9	6.35798e-05	TCF21, KRT27, TBX3, TFAP2A, PROX1, NKX2-5, WNT7A, ZIC2, NKX2-3	0.0633314	0.00123369	0.100773	GOTERM_BP_FAT	GO:0010647~positive regulation of cell communication	8	0.233937	LAMA2, CDH13, MIER1, MALT1, JAK2, F7, GHSR, INSR	1	0.928669	98.9275	GOTERM_BP_FAT	GO:0000904~cell morphogenesis involved in differentiation	3	0.31211	FEZF2, NR4A2, VAX1	1	0.901954	99.5488
Category	Term	Count	PValue	Genes	Bonferroni	Benjamini	FDR	GOTERM_BP_FAT	GO:0035239~tube morphogenesis	6	0.0027152	TCF21, TBX3, GATA4, TFAP2A, NKX2-5, ZIC2	0.939052	0.0327579	4.2198	GOTERM_BP_FAT	GO:0009967~positive regulation of signal transduction	7	0.276466	CDH13, MIER1, MALT1, JAK2, F7, GHSR, INSR	1	0.943836	99.5943	GOTERM_BP_FAT	GO:0031175~neuron projection development	3	0.332309	FEZF2, NR4A2, VAX1	1	0.913501	99.7066
GOTERM_BP_FAT	GO:0048754~branching morphogenesis of a tube	8	7.42172e-05	SPRY2, NOTCH1, FOXA2, BCL2, FOXA1, GBX2, GLI3, HOXD11	0.122585	0.0108388	0.125641	GOTERM_BP_FAT	GO:0002009~morphogenesis of an epithelium	5	0.00711452	TCF21, TFAP2A, PROX1, ZIC2, NKX2-3	0.999355	0.0759601	10.7046	GOTERM_BP_FAT	GO:0001817~regulation of cytokine production	3	0.703065	MALT1, JAK2, GHSR	1	0.998392	100
GOTERM_BP_FAT	GO:0048729~tissue morphogenesis	8	0.0250085	NOTCH1, SHROOM3, TBX5, BCL2, FOXC1, NR4A3, GLI3, HOXD11	1	0.381119	34.884	GOTERM_BP_FAT	GO:0060429~epithelium development	7	0.00739031	TCF21, FZD1, TFAP2A, PROX1, WT1, ZIC2, NKX2-3	0.999516	0.0779914	11.0971									Annotation Cluster 14	Enrichment Score: 0.43708589902910405
GOTERM_BP_FAT	GO:0048547~gut morphogenesis	3	0.0336654	NOTCH1, BCL2, GLI3	1	0.437107	44.0141	GOTERM_BP_FAT	GO:0048732~gland development	5	0.0190093	TCF21, TBX3, HOXD3, NKX2-5, NKX2-3	1	0.160349	26.2388	Annotation Cluster 16	Enrichment Score: 1.404037055390916							Category	Term	Count	PValue	Genes	Bonferroni	Benjamini	FDR
GOTERM_BP_FAT	GO:0048546~digestive tract morphogenesis	3	0.0462972	NOTCH1, BCL2, GLI3	1	0.513266	55.1996	GOTERM_BP_FAT	GO:0060562~epithelial tube morphogenesis	3	0.0908216	TCF21, TFAP2A, ZIC2	1	0.500855	77.9053	Category	Term	Count	PValue	Genes	Bonferroni	Benjamini	FDR	GOTERM_BP_FAT	GO:0006366~transcription from RNA polymerase II promoter	3	0.30289	SHOX, NFIX, PAX3	1	0.896411	99.4532
GOTERM_BP_FAT	GO:0055123~digestive system development	3	0.0462972	NOTCH1, BCL2, GLI3	1	0.513266	55.1996									GOTERM_BP_FAT	GO:0051098~regulation of binding	8	0.0139737	RSF1, ID2, BLM, SMAD7, MALT1, JAK2, NR2F2, APEX1	1	0.308223	21.2965	GOTERM_BP_FAT	GO:0006351~transcription, DNA-dependent	3	0.400661	SHOX, NFIX, PAX3	1	0.951679	99.9383
GOTERM_BP_FAT	GO:0048565~gut development	3	0.121363	NOTCH1, BCL2, GLI3	1	0.728205	88.8262	Annotation Cluster 15	Enrichment Score: 2.5949801199255362							GOTERM_BP_FAT	GO:0051101~regulation of DNA binding	7	0.0143326	RSF1, ID2, SMAD7, MALT1, JAK2, NR2F2, APEX1	1	0.307554	21.7827	GOTERM_BP_FAT	GO:0032774~RNA biosynthetic process	3	0.402421	SHOX, NFIX, PAX3	1	0.95082	99.9409
GOTERM_BP_FAT	GO:0048589~developmental growth	4	0.135885	NOTCH1, BCL2, GLI3, HOXD11	1	0.747449	91.5744	Category	Term	Count	PValue	Genes	Bonferroni	Benjamini	FDR	GOTERM_BP_FAT	GO:0043392~negative regulation of DNA binding	4	0.0641961	RSF1, ID2, SMAD7, JAK2	1	0.672335	67.6689
GOTERM_BP_FAT	GO:0040007~growth	6	0.156992	NOTCH1, BCL2, FOXC1, GLI3, APBA1, HOXD11	1	0.777886	94.4579	GOTERM_BP_FAT	GO:0035108~limb morphogenesis	6	0.000901485	MSX1, HOXC11, TBX3, EVX2, ALX4, WNT7A	0.604675	0.0124629	1.41998	GOTERM_BP_FAT	GO:0051090~regulation of transcription factor activity	5	0.0798953	ID2, SMAD7, MALT1, JAK2, NR2F2	1	0.722686	75.7575	Annotation Cluster 15	Enrichment Score: 0.41476767745069076
								GOTERM_BP_FAT	GO:0035107~appendage morphogenesis	6	0.000901485	MSX1, HOXC11, TBX3, EVX2, ALX4, WNT7A	0.604675	0.0124629	1.41998	GOTERM_BP_FAT	GO:0051100~negative regulation of binding	4	0.0929284	RSF1, ID2, SMAD7, JAK2	1	0.758016	80.9831	Category	Term	Count	PValue	Genes	Bonferroni	Benjamini	FDR
Annotation Cluster 14	Enrichment Score: 1.484331797101339							GOTERM_BP_FAT	GO:0048736~appendage development	6	0.00107753	MSX1, HOXC11, TBX3, EVX2, ALX4, WNT7A	0.670236	0.0144911	1.69506									KEGG_PATHWAY	hsa04080:Neuroactive ligand-receptor interaction	3	0.0631061	HTR1B, CHRM1, GPR50	0.827956	0.827956	41.728
Category	Term	Count	PValue	Genes	Bonferroni	Benjamini	FDR	GOTERM_BP_FAT	GO:0060173~limb development	6	0.00107753	MSX1, HOXC11, TBX3, EVX2, ALX4, WNT7A	0.670236	0.0144911	1.69506	Annotation Cluster 17	Enrichment Score: 1.3827911899212395							SP_PIR_KEYWORDS	transducer	4	0.118928	IRS4, HTR1B, CHRM1, GPR50	1	0.712077	76.5206
GOTERM_BP_FAT	GO:0001655~urogenital system development	9	0.000542101	HOXA13, BCL2, FOXA1, PCSK9, POU3F3, FOXC1, GDNF, GLI3, HOXD11	0.615358	0.0406899	0.914298	GOTERM_BP_FAT	GO:0035113~embryonic appendage morphogenesis	5	0.00420144	MSX1, HOXC11, TBX3, ALX4, WNT7A	0.986864	0.0475128	6.45839	Category	Term	Count	PValue	Genes	Bonferroni	Benjamini	FDR	PIR_SUPERFAMILY	PIRSF800006:rhodopsin-like G protein-coupled receptors	3	0.125187	HTR1B, CHRM1, GPR50	0.953863	0.953863	65.3582
GOTERM_BP_FAT	GO:0001657~ureteric bud development	5	0.00259928	BCL2, FOXC1, GDNF, GLI3, HOXD11	0.989805	0.133514	4.31283	GOTERM_BP_FAT	GO:0030326~embryonic limb morphogenesis	5	0.00420144	MSX1, HOXC11, TBX3, ALX4, WNT7A	0.986864	0.0475128	6.45839	INTERPRO	IPR001092:Basic helix-loop-helix dimerisation region bHLH	7	0.0106533	ATOH1, ID2, EBF3, HES4, EBF1, NEUROG2, SIM1	0.996105	0.603336	14.3586	INTERPRO	IPR017452:GPCR, rhodopsin-like superfamily	3	0.192796	HTR1B, CHRM1, GPR50	1	0.961622	91.9339
GOTERM_BP_FAT	GO:0001822~kidney development	7	0.00633565	BCL2, PCSK9, POU3F3, FOXC1, GDNF, GLI3, HOXD11	0.999986	0.229288	10.2067	GOTERM_BP_FAT	GO:0035115~embryonic forelimb morphogenesis	3	0.00885461	TBX3, ALX4, WNT7A	0.999894	0.090036	13.1541	UP_SEQ_FEATURE	DNA-binding region:Basic motif	8	0.0123459	ATOH1, ATF3, HES4, MAFB, JUN, NEUROG2, NFIL3, SIM1	0.999971	0.876559	17.4669	INTERPRO	IPR000276:7TM GPCR, rhodopsin-like	3	0.198933	HTR1B, CHRM1, GPR50	1	0.952108	92.626
GOTERM_BP_FAT	GO:0001656~metanephros development	5	0.00644445	BCL2, FOXC1, GDNF, GLI3, HOXD11	0.999989	0.228105	10.3731	GOTERM_BP_FAT	GO:0035136~forelimb morphogenesis	3	0.0117873	TBX3, ALX4, WNT7A	0.999995	0.113792	17.1406	SMART	SM00353:HLH	7	0.024874	ATOH1, ID2, EBF3, HES4, EBF1, NEUROG2, SIM1	0.96021	0.658604	25.3622	SP_PIR_KEYWORDS	receptor	6	0.2095	HTR1B, CHRM1, LRP1B, NR4A2, GPR50, NPR3	1	0.785864	93.215
GOTERM_BP_FAT	GO:0045597~positive regulation of cell differentiation	10	0.0101763	IRX3, NOTCH1, CDKN2B, FOXA2, TBX5, BCL2, FOXA1, PAX6, GLI3, HOXD11	1	0.271075	15.9079									UP_SEQ_FEATURE	domain:Helix-loop-helix motif	5	0.0967	ATOH1, ID2, HES4, NEUROG2, SIM1	1	0.999809	79.2287	GOTERM_BP_FAT	GO:0019932~second-messenger-mediated signaling	3	0.219761	HTR1B, CHRM1, NPR3	1	0.822766	97.2194
GOTERM_BP_FAT	GO:0060429~epithelium development	9	0.0122625	SHROOM3, FOXA2, TBX5, BCL2, FOXA1, PAX6, NR2F2, GLI3, HOXD11	1	0.280642	18.8602	Annotation Cluster 16	Enrichment Score: 2.46226688798482							INTERPRO	IPR011598:Helix-loop-helix DNA-binding	3	0.385361	ATOH1, HES4, NEUROG2	1	0.999994	99.9127	UP_SEQ_FEATURE	disulfide bond	9	0.257582	COL9A1, COL9A2, HTR1B, CHRM1, LRP1B, GPR50, KLK10, IFNA8, NPR3	1	0.999813	98.193
GOTERM_BP_FAT	GO:0048729~tissue morphogenesis	8	0.0250085	NOTCH1, SHROOM3, TBX5, BCL2, FOXC1, NR4A3, GLI3, HOXD11	1	0.381119	34.884	Category	Term	Count	PValue	Genes	Bonferroni	Benjamini	FDR									SP_PIR_KEYWORDS	g-protein coupled receptor	3	0.269325	HTR1B, CHRM1, GPR50	1	0.842974	97.2432
GOTERM_BP_FAT	GO:0060173~limb development	6	0.027556	NOTCH1, HOXA13, TBX5, NR2F2, GLI3, HOXD11	1	0.391844	37.7067	GOTERM_BP_FAT	GO:0007423~sensory organ development	9	0.000333645	FOXL2, BDNF, GSC, LMX1B, SOX1, PROX1, NKX2-5, COL5A1, WT1	0.29063	0.00475778	0.52776	Annotation Cluster 18	Enrichment Score: 1.364489073488393							SP_PIR_KEYWORDS	disulfide bond	9	0.299125	COL9A1, COL9A2, HTR1B, CHRM1, LRP1B, GPR50, KLK10, IFNA8, NPR3	1	0.864279	98.2882
GOTERM_BP_FAT	GO:0048736~appendage development	6	0.027556	NOTCH1, HOXA13, TBX5, NR2F2, GLI3, HOXD11	1	0.391844	37.7067	GOTERM_BP_FAT	GO:0001654~eye development	6	0.00320747	FOXL2, LMX1B, SOX1, PROX1, COL5A1, WT1	0.96333	0.03771	4.96676	Category	Term	Count	PValue	Genes	Bonferroni	Benjamini	FDR	GOTERM_BP_FAT	GO:0007186~G-protein coupled receptor protein signaling pathway	4	0.387528	HTR1B, CHRM1, GPR50, NPR3	1	0.946909	99.9156
GOTERM_BP_FAT	GO:0001658~branching involved in ureteric bud morphogenesis	3	0.050837	BCL2, GLI3, HOXD11	1	0.52641	58.6781	GOTERM_BP_FAT	GO:0043010~camera-type eye development	5	0.00869017	FOXL2, LMX1B, SOX1, PROX1, WT1	0.999874	0.0893119	12.9254	GOTERM_BP_FAT	GO:0035295~tube development	10	0.0141697	WNT5A, SEMA5A, CTTNBP2, LBX1, HOXA11, FOXF1, ZIC5, CRH, PCSK5, IFT88	1	0.308184	21.5625	GOTERM_BP_FAT	GO:0007267~cell-cell signaling	4	0.407916	HTR1B, WNT16, CHRM1, GPR50	1	0.951756	99.9482
GOTERM_BP_FAT	GO:0060675~ureteric bud morphogenesis	3	0.050837	BCL2, GLI3, HOXD11	1	0.52641	58.6781	GOTERM_BP_FAT	GO:0048592~eye morphogenesis	4	0.0152215	FOXL2, SOX1, PROX1, COL5A1	1	0.138344	21.5907	GOTERM_BP_FAT	GO:0030323~respiratory tube development	6	0.0279251	WNT5A, CTTNBP2, FOXF1, CRH, PCSK5, IFT88	1	0.464997	38.245	SP_PIR_KEYWORDS	transmembrane protein	3	0.518519	HTR1B, CHRM1, NPR3	1	0.976477	99.9767
GOTERM_BP_FAT	GO:0035113~embryonic appendage morphogenesis	5	0.0584443	NOTCH1, HOXA13, TBX5, GLI3, HOXD11	1	0.555145	63.9436									GOTERM_BP_FAT	GO:0030324~lung development	5	0.082668	WNT5A, CTTNBP2, FOXF1, CRH, IFT88	1	0.729403	76.9712	GOTERM_CC_FAT	GO:0031226~intrinsic to plasma membrane	4	0.518661	HTR1B, LYPD3, CHRM1, GPR50	1	0.996012	99.9459
GOTERM_BP_FAT	GO:0030326~embryonic limb morphogenesis	5	0.0584443	NOTCH1, HOXA13, TBX5, GLI3, HOXD11	1	0.555145	63.9436	Annotation Cluster 17	Enrichment Score: 2.459860456660757							GOTERM_BP_FAT	GO:0060541~respiratory system development	5	0.1065	WNT5A, CTTNBP2, FOXF1, CRH, IFT88	1	0.79313	85.2863	GOTERM_CC_FAT	GO:0005624~membrane fraction	3	0.596704	CHRM1, LRP1B, NPR3	1	0.994176	99.9912
GOTERM_BP_FAT	GO:0035108~limb morphogenesis	5	0.0823352	NOTCH1, HOXA13, TBX5, GLI3, HOXD11	1	0.63553	76.6701	Category	Term	Count	PValue	Genes	Bonferroni	Benjamini	FDR									GOTERM_CC_FAT	GO:0005626~insoluble fraction	3	0.617115	CHRM1, LRP1B, NPR3	1	0.990562	99.9949
GOTERM_BP_FAT	GO:0035107~appendage morphogenesis	5	0.0823352	NOTCH1, HOXA13, TBX5, GLI3, HOXD11	1	0.63553	76.6701	GOTERM_BP_FAT	GO:0045892~negative regulation of transcription, DNA-dependent	14	2.63591e-06	GSC, HELT, TBX3, CDX4, SOX9, PRDM16, PROX1, WT1, TCF21, DLX2, MSX1, OLIG2, NKX2-5, FOXD3	0.00270868	9.04078e-05	0.00417975	Annotation Cluster 19	Enrichment Score: 1.2185458908001008							GOTERM_BP_FAT	GO:0007166~cell surface receptor linked signal transduction	6	0.620113	HTR1B, WNT16, CHRM1, GPR50, NPR3, NKX2-2	1	0.994094	99.9999
GOTERM_BP_FAT	GO:0002009~morphogenesis of an epithelium	5	0.0958292	SHROOM3, TBX5, BCL2, GLI3, HOXD11	1	0.667952	81.8475	GOTERM_BP_FAT	GO:0051253~negative regulation of RNA metabolic process	14	3.16771e-06	GSC, HELT, TBX3, CDX4, SOX9, PRDM16, PROX1, WT1, TCF21, DLX2, MSX1, OLIG2, NKX2-5, FOXD3	0.00325427	0.000105142	0.005023	Category	Term	Count	PValue	Genes	Bonferroni	Benjamini	FDR	SP_PIR_KEYWORDS	cell membrane	6	0.637883	IRS4, HTR1B, LYPD3, CHRM1, PCDHGA7, GPR50	1	0.988197	99.9991
GOTERM_BP_FAT	GO:0060562~epithelial tube morphogenesis	4	0.111662	SHROOM3, BCL2, GLI3, HOXD11	1	0.70689	86.542	GOTERM_CC_FAT	GO:0005667~transcription factor complex	7	0.000437831	GSC, HELT, EPAS1, ALX4, NKX2-5, ATF1, PITX2	0.0432667	0.0432667	0.485797	GOTERM_CC_FAT	GO:0005667~transcription factor complex	9	0.0141735	LBX1, SMAD7, MAFB, JUN, HOXA11, FOXF1, TAF7, POU3F2, TFAP2D	0.985792	0.880801	17.3505	GOTERM_CC_FAT	GO:0005886~plasma membrane	8	0.701063	IRS4, HTR1B, LYPD3, OLIG3, CHRM1, PCDHGA7, GPR50, PRKCE	1	0.994095	99.9996
GOTERM_BP_FAT	GO:0001501~skeletal system development	9	0.129005	DLX2, HOXA13, BCL2, ROR2, FOXC1, MYC, GLI3, CBFB, HOXD11	1	0.739347	90.3632	GOTERM_CC_FAT	GO:0044451~nucleoplasm part	9	0.00419901	GSC, HELT, EPAS1, PRDM16, ALX4, NKX2-5, ATF1, WT1, PITX2	0.346226	0.132088	4.57141	GOTERM_CC_FAT	GO:0005654~nucleoplasm	23	0.0164313	CDX2, LBX1, BLM, SMAD7, MAFB, HOXA11, PRKAG2, L3MBTL, TAF7, POLR1A, WBP11, CDC5L, PRDM16, COIL, RNGTT, JUN, FOXF1, PAX8, POU3F2, TFAP2D, SUPT7L, SMARCA2, APEX1	0.992825	0.80713	19.842	GOTERM_CC_FAT	GO:0000267~cell fraction	3	0.756693	CHRM1, LRP1B, NPR3	1	0.996496	100
GOTERM_BP_FAT	GO:0048589~developmental growth	4	0.135885	NOTCH1, BCL2, GLI3, HOXD11	1	0.747449	91.5744	GOTERM_CC_FAT	GO:0031981~nuclear lumen	13	0.034946	GSC, HELT, EPAS1, TBX3, SOX9, PRDM16, WT1, ATF1, OLIG2, ALX4, NKX2-5, NKX2-2, PITX2	0.972476	0.401448	32.6695	GOTERM_CC_FAT	GO:0044451~nucleoplasm part	16	0.0228299	CDX2, LBX1, BLM, MAFB, SMAD7, HOXA11, TAF7, WBP11, CDC5L, PRDM16, COIL, JUN, FOXF1, POU3F2, TFAP2D, SUPT7L	0.998974	0.821032	26.5304	GOTERM_CC_FAT	GO:0005887~integral to plasma membrane	3	0.756693	HTR1B, CHRM1, GPR50	1	0.996496	100
GOTERM_BP_FAT	GO:0040007~growth	6	0.156992	NOTCH1, BCL2, FOXC1, GLI3, APBA1, HOXD11	1	0.777886	94.4579	GOTERM_CC_FAT	GO:0005654~nucleoplasm	9	0.0528144	GSC, HELT, EPAS1, PRDM16, ALX4, NKX2-5, ATF1, WT1, PITX2	0.995832	0.495928	45.3041	GOTERM_CC_FAT	GO:0031981~nuclear lumen	32	0.0301234	CDX2, FOXK1, BLM, HOXA11, PRKAG2, WBP11, PRDM16, COIL, RNGTT, FOXF1, PAX8, ISY1, POU3F2, SUPT7L, NAT10, APEX1, NKX2-2, LBX1, SMAD7, MAFB, NOL8, L3MBTL, TAF7, POLR1A, CENPF, CDC5L, ATF3, JUN, JAK2, TFAP2D, HPGD, SMARCA2	0.99989	0.781097	33.5227	GOTERM_CC_FAT	GO:0044459~plasma membrane part	5	0.784227	IRS4, HTR1B, LYPD3, CHRM1, GPR50	1	0.996952	100
GOTERM_BP_FAT	GO:0060348~bone development	4	0.280775	BCL2, FOXC1, CBFB, HOXD11	1	0.90201	99.6238	GOTERM_CC_FAT	GO:0070013~intracellular organelle lumen	13	0.121862	GSC, HELT, EPAS1, TBX3, SOX9, PRDM16, WT1, ATF1, OLIG2, ALX4, NKX2-5, NKX2-2, PITX2	0.999998	0.730855	76.4271	GOTERM_CC_FAT	GO:0070013~intracellular organelle lumen	34	0.125031	CDX2, FOXK1, BLM, HOXA11, PRKAG2, WBP11, PRDM16, COIL, RNGTT, FOXF1, PAX8, ISY1, POU3F2, SUPT7L, NAT10, PCSK5, APEX1, NKX2-2, LBX1, SMAD7, MAFB, NOL8, TAF7, L3MBTL, POLR1A, CENPF, CDC5L, ATF3, JUN, JAK2, TFAP2D, HPGD, SMARCA2, ACAA1	1	0.963735	83.1873	UP_SEQ_FEATURE	topological domain:Extracellular	6	0.78948	HTR1B, CHRM1, LRP1B, PCDHGA7, GPR50, NPR3	1	1	100
								GOTERM_CC_FAT	GO:0043233~organelle lumen	13	0.137793	GSC, HELT, EPAS1, TBX3, SOX9, PRDM16, WT1, ATF1, OLIG2, ALX4, NKX2-5, NKX2-2, PITX2	1	0.743671	80.7694	GOTERM_CC_FAT	GO:0043233~organelle lumen	34	0.145454	CDX2, FOXK1, BLM, HOXA11, PRKAG2, WBP11, PRDM16, COIL, RNGTT, FOXF1, PAX8, ISY1, POU3F2, SUPT7L, NAT10, PCSK5, APEX1, NKX2-2, LBX1, SMAD7, MAFB, NOL8, TAF7, L3MBTL, POLR1A, CENPF, CDC5L, ATF3, JUN, JAK2, TFAP2D, HPGD, SMARCA2, ACAA1	1	0.964768	87.7338	UP_SEQ_FEATURE	topological domain:Cytoplasmic	7	0.889773	HTR1B, CHRM1, LRP1B, LRRTM1, PCDHGA7, GPR50, NPR3	1	1	100
Annotation Cluster 15	Enrichment Score: 1.4665820797030946							GOTERM_CC_FAT	GO:0031974~membrane-enclosed lumen	13	0.152715	GSC, HELT, EPAS1, TBX3, SOX9, PRDM16, WT1, ATF1, OLIG2, ALX4, NKX2-5, NKX2-2, PITX2	1	0.752117	84.1629	GOTERM_CC_FAT	GO:0031974~membrane-enclosed lumen	34	0.169606	CDX2, FOXK1, BLM, HOXA11, PRKAG2, WBP11, PRDM16, COIL, RNGTT, FOXF1, PAX8, ISY1, POU3F2, SUPT7L, NAT10, PCSK5, APEX1, NKX2-2, LBX1, SMAD7, MAFB, NOL8, TAF7, L3MBTL, POLR1A, CENPF, CDC5L, ATF3, JUN, JAK2, TFAP2D, HPGD, SMARCA2, ACAA1	1	0.968619	91.6345	GOTERM_BP_FAT	GO:0007242~intracellular signaling cascade	4	0.906542	HTR1B, CHRM1, NPR3, PRKCE	1	0.999991	100
Category	Term	Count	PValue	Genes	Bonferroni	Benjamini	FDR									GOTERM_CC_FAT	GO:0005730~nucleolus	13	0.361316	FOXK1, BLM, NOL8, TAF7, L3MBTL, POLR1A, CDC5L, COIL, ATF3, ISY1, NAT10, HPGD, NKX2-2	1	0.972975	99.7484
GOTERM_BP_FAT	GO:0007423~sensory organ development	11	0.00330442	SPRY2, CDKN1B, BCL2, PAX6, GBX2, FOXC1, RPL24, NR4A3, CLN8, MYC, GLI3	0.997068	0.14956	5.45229	Annotation Cluster 18	Enrichment Score: 2.2025165643636866															Annotation Cluster 16	Enrichment Score: 0.375857854888642
GOTERM_BP_FAT	GO:0043010~camera-type eye development	5	0.084954	PAX6, FOXC1, RPL24, CLN8, GLI3	1	0.642692	77.7725	Category	Term	Count	PValue	Genes	Bonferroni	Benjamini	FDR	Annotation Cluster 20	Enrichment Score: 1.2172749202334725							Category	Term	Count	PValue	Genes	Bonferroni	Benjamini	FDR
GOTERM_BP_FAT	GO:0001654~eye development	5	0.141897	PAX6, FOXC1, RPL24, CLN8, GLI3	1	0.749119	92.5143	GOTERM_BP_FAT	GO:0006928~cell motion	13	0.000234571	LMX1B, SOX1, BARHL2, NR4A2, LMX1A, TBR1, COL5A1, FEZF1, FEZF2, BDNF, ISL2, LHX2, NKX2-3	0.214474	0.00354374	0.371319	Category	Term	Count	PValue	Genes	Bonferroni	Benjamini	FDR	SP_PIR_KEYWORDS	zinc-finger	10	0.127679	FEZF2, ZBTB46, TRIM67, EBF2, NR4A2, PRKCE, PRDM16, LIN28B, WT1, ZIC2	1	0.710584	79.0552
								GOTERM_BP_FAT	GO:0001764~neuron migration	5	0.00136834	FEZF1, LMX1B, SOX1, BARHL2, NR4A2	0.755608	0.0179017	2.14789	INTERPRO	IPR003659:Plexin/semaphorin/integrin	4	0.0370725	SEMA5A, SEMA6B, ATRNL1, ITGB5	1	0.913367	42.115	INTERPRO	IPR013087:Zinc finger, C2H2-type/integrase, DNA-binding	5	0.162846	FEZF2, ZBTB46, PRDM16, WT1, ZIC2	1	0.952352	87.6223
Annotation Cluster 16	Enrichment Score: 1.4004447313954254							GOTERM_BP_FAT	GO:0021953~central nervous system neuron differentiation	4	0.0033583	LMX1B, SOX1, NR4A2, LMX1A	0.968617	0.0390063	5.19453	SMART	SM00423:PSI	4	0.05961	SEMA5A, SEMA6B, ATRNL1, ITGB5	0.999617	0.792659	51.0202	SP_PIR_KEYWORDS	zinc	11	0.197476	COL9A1, FEZF2, ZBTB46, TRIM67, EBF2, NR4A2, PRKCE, PRDM16, LIN28B, WT1, ZIC2	1	0.802585	91.9354
Category	Term	Count	PValue	Genes	Bonferroni	Benjamini	FDR	GOTERM_BP_FAT	GO:0016477~cell migration	7	0.0180318	FEZF1, LMX1B, SOX1, BARHL2, NR4A2, COL5A1, NKX2-3	1	0.156519	25.0646	INTERPRO	IPR002165:Plexin	3	0.10088	SEMA5A, SEMA6B, ATRNL1	1	0.995947	78.539	INTERPRO	IPR007087:Zinc finger, C2H2-type	5	0.292999	FEZF2, ZBTB46, PRDM16, WT1, ZIC2	1	0.986677	98.3015
KEGG_PATHWAY	hsa05222:Small cell lung cancer	10	1.76027e-05	CCNE2, CCND1, CDKN1B, CDKN2B, BCL2, ITGA2, MYC, AKT3, ITGA2B, FN1	0.00189931	0.00189931	0.0198189	GOTERM_BP_FAT	GO:0021954~central nervous system neuron development	3	0.0241061	LMX1B, SOX1, NR4A2	1	0.197686	32.0868									INTERPRO	IPR015880:Zinc finger, C2H2-like	5	0.306455	FEZF2, ZBTB46, PRDM16, WT1, ZIC2	1	0.984668	98.6449
KEGG_PATHWAY	hsa04510:Focal adhesion	10	0.00680711	CCND1, RASGRF1, BCL2, COL6A1, RAP1A, ITGA2, PPP1CC, AKT3, ITGA2B, FN1	0.521779	0.168414	7.4027	GOTERM_BP_FAT	GO:0048870~cell motility	7	0.0285638	FEZF1, LMX1B, SOX1, BARHL2, NR4A2, COL5A1, NKX2-3	1	0.221658	36.8425	Annotation Cluster 21	Enrichment Score: 1.1984421794870272							UP_SEQ_FEATURE	zinc finger region:C2H2-type 4	4	0.306928	FEZF2, PRDM16, WT1, ZIC2	1	0.999938	99.2848
SP_PIR_KEYWORDS	pyroglutamic acid	3	0.0301732	COL6A1, ITGA2B, FN1	0.999767	0.44978	33.2036	GOTERM_BP_FAT	GO:0051674~localization of cell	7	0.0285638	FEZF1, LMX1B, SOX1, BARHL2, NR4A2, COL5A1, NKX2-3	1	0.221658	36.8425	Category	Term	Count	PValue	Genes	Bonferroni	Benjamini	FDR	UP_SEQ_FEATURE	zinc finger region:C2H2-type 2	4	0.348033	FEZF2, ZBTB46, PRDM16, WT1	1	0.99997	99.6862
GOTERM_BP_FAT	GO:0031589~cell-substrate adhesion	5	0.0722716	BCL2, ITGA2, ANTXR1, ITGA2B, FN1	1	0.603202	71.9361									UP_SEQ_FEATURE	DNA-binding region:Basic motif	8	0.0123459	ATOH1, ATF3, HES4, MAFB, JUN, NEUROG2, NFIL3, SIM1	0.999971	0.876559	17.4669	UP_SEQ_FEATURE	zinc finger region:C2H2-type 3	4	0.352476	FEZF2, PRDM16, WT1, ZIC2	1	0.999947	99.7138
SP_PIR_KEYWORDS	heterodimer	4	0.134802	MAT2A, ITGA2, ITGA2B, FN1	1	0.756288	85.1486	Annotation Cluster 19	Enrichment Score: 2.1724945872103594							INTERPRO	IPR004827:Basic-leucine zipper (bZIP) transcription factor	4	0.0577908	ATF3, MAFB, JUN, NFIL3	1	0.967489	57.7467	GOTERM_MF_FAT	GO:0008270~zinc ion binding	11	0.515668	COL9A1, FEZF2, ZBTB46, TRIM67, EBF2, NR4A2, PRKCE, PRDM16, LIN28B, WT1, ZIC2	1	0.995953	99.9737
KEGG_PATHWAY	hsa04512:ECM-receptor interaction	4	0.155364	COL6A1, ITGA2, ITGA2B, FN1	1	0.838553	85.0619	Category	Term	Count	PValue	Genes	Bonferroni	Benjamini	FDR	SMART	SM00338:BRLZ	4	0.0910239	ATF3, MAFB, JUN, NFIL3	0.999995	0.869447	66.9892	UP_SEQ_FEATURE	zinc finger region:C2H2-type 5	3	0.535194	FEZF2, PRDM16, ZIC2	1	1	99.9967
GOTERM_BP_FAT	GO:0007160~cell-matrix adhesion	4	0.170644	BCL2, ITGA2, ITGA2B, FN1	1	0.791935	95.7969	INTERPRO	IPR018186:Transcription factor, T-box, conserved site	3	0.00531464	TBX15, TBX3, TBR1	0.640533	0.0972533	6.41916	UP_SEQ_FEATURE	domain:Leucine-zipper	4	0.247568	ATF3, MAFB, JUN, NFIL3	1	1	98.7668	SP_PIR_KEYWORDS	metal-binding	11	0.542695	COL9A1, FEZF2, ZBTB46, TRIM67, EBF2, NR4A2, PRKCE, PRDM16, LIN28B, WT1, ZIC2	1	0.978652	99.9871
SP_PIR_KEYWORDS	cell adhesion	7	0.504627	ICAM1, CTNND2, COL6A1, ITGA2, ADAM12, ITGA2B, FN1	1	0.961237	99.9904	INTERPRO	IPR001699:Transcription factor, T-box	3	0.00531464	TBX15, TBX3, TBR1	0.640533	0.0972533	6.41916									UP_SEQ_FEATURE	zinc finger region:C2H2-type 1	3	0.575792	FEZF2, ZBTB46, WT1	1	1	99.999
KEGG_PATHWAY	hsa04810:Regulation of actin cytoskeleton	5	0.528148	FGF14, ITGA2, PPP1CC, ITGA2B, FN1	1	0.933058	99.9788	SMART	SM00425:TBOX	3	0.010754	TBX15, TBX3, TBR1	0.442258	0.0927251	10.0505	Annotation Cluster 22	Enrichment Score: 1.179750104741341							SMART	SM00355:ZnF_C2H2	5	0.658187	FEZF2, ZBTB46, PRDM16, WT1, ZIC2	1	0.999993	99.9957
																Category	Term	Count	PValue	Genes	Bonferroni	Benjamini	FDR	GOTERM_MF_FAT	GO:0046914~transition metal ion binding	11	0.756663	COL9A1, FEZF2, ZBTB46, TRIM67, EBF2, NR4A2, PRKCE, PRDM16, LIN28B, WT1, ZIC2	1	0.999958	100
Annotation Cluster 17	Enrichment Score: 1.4002033853598075							Annotation Cluster 20	Enrichment Score: 2.169844566306948							GOTERM_MF_FAT	GO:0042562~hormone binding	4	0.0322399	CDH13, NPR3, GHSR, INSR	0.999998	0.808896	36.7297	GOTERM_MF_FAT	GO:0043167~ion binding	16	0.808269	DCHS2, ZBTB46, LRP1B, NR4A2, PCDHGA7, NPR3, PRDM16, PRKCE, LIN28B, WT1, ZIC2, COL9A1, FEZF2, TRIM67, EBF2, GEFT	1	0.999985	100
Category	Term	Count	PValue	Genes	Bonferroni	Benjamini	FDR	Category	Term	Count	PValue	Genes	Bonferroni	Benjamini	FDR	GOTERM_MF_FAT	GO:0017046~peptide hormone binding	3	0.0640811	NPR3, GHSR, INSR	1	0.872306	60.3496	GOTERM_MF_FAT	GO:0046872~metal ion binding	14	0.916923	DCHS2, ZBTB46, LRP1B, NR4A2, PCDHGA7, PRDM16, PRKCE, LIN28B, WT1, ZIC2, COL9A1, FEZF2, TRIM67, EBF2	1	1	100
UP_SEQ_FEATURE	domain:PDZ	6	0.0292132	ARHGAP21, SHROOM3, RGS12, PDLIM3, SIPA1L3, HTRA4	1	0.977801	37.0027	UP_SEQ_FEATURE	DNA-binding region:Fork-head	4	0.0030419	FOXL2, FOXB2, FOXD2, FOXD3	0.726874	0.102509	4.1976	GOTERM_MF_FAT	GO:0042277~peptide binding	6	0.139838	AGTR1, CLTB, NPR3, GHSR, INSR, PCSK5	1	0.959359	87.8045	GOTERM_MF_FAT	GO:0043169~cation binding	14	0.922878	DCHS2, ZBTB46, LRP1B, NR4A2, PCDHGA7, PRDM16, PRKCE, LIN28B, WT1, ZIC2, COL9A1, FEZF2, TRIM67, EBF2	1	1	100
INTERPRO	IPR001478:PDZ/DHR/GLGF	7	0.0311648	ARHGAP21, SHROOM3, RGS12, PDLIM3, SIPA1L3, HTRA4, APBA1	1	0.862854	36.6303	INTERPRO	IPR018122:Transcription factor, fork head, conserved site	4	0.00370793	FOXL2, FOXB2, FOXD2, FOXD3	0.509949	0.0761906	4.51968
SMART	SM00228:PDZ	7	0.0692063	ARHGAP21, SHROOM3, RGS12, PDLIM3, SIPA1L3, HTRA4, APBA1	0.999897	0.783459	56.5205	INTERPRO	IPR001766:Transcription factor, fork head	4	0.00370793	FOXL2, FOXB2, FOXD2, FOXD3	0.509949	0.0761906	4.51968	Annotation Cluster 23	Enrichment Score: 1.1578496877706224							Annotation Cluster 17	Enrichment Score: 0.3399577532103085
								SMART	SM00339:FH	4	0.0101155	FOXL2, FOXB2, FOXD2, FOXD3	0.422483	0.10399	9.48019	Category	Term	Count	PValue	Genes	Bonferroni	Benjamini	FDR	Category	Term	Count	PValue	Genes	Bonferroni	Benjamini	FDR
Annotation Cluster 18	Enrichment Score: 1.3709780067296062							INTERPRO	IPR011991:Winged helix repressor DNA-binding	5	0.0334491	FOXL2, PAX7, FOXB2, FOXD2, FOXD3	0.998544	0.419776	34.5295	GOTERM_CC_FAT	GO:0043228~non-membrane-bounded organelle	46	0.061362	ABLIM2, PRPF4B, CDX2, BLM, FOXK1, COIL, TPM1, FRMD1, ARHGAP21, TUBGCP3, CDYL, ANK1, MYOM2, PPP2CA, CAMSAP1, ISY1, TEKT3, NAT10, APEX1, NKX2-2, ELMOD1, KCND2, HIST1H1C, NOL8, TAF7, GRIN1, L3MBTL, POLR1A, CENPF, CDC5L, PCM1, RPS5, FNBP1, KRTAP5-6, ATF3, ID2, CEP350, JUN, PSMA3, SNTG1, MAP7, JAK2, HPGD, IFT88, SPTAN1, SERP1	1	0.905473	57.0595	SP_PIR_KEYWORDS	receptor	6	0.2095	HTR1B, CHRM1, LRP1B, NR4A2, GPR50, NPR3	1	0.785864	93.215
Category	Term	Count	PValue	Genes	Bonferroni	Benjamini	FDR									GOTERM_CC_FAT	GO:0043232~intracellular non-membrane-bounded organelle	46	0.061362	ABLIM2, PRPF4B, CDX2, BLM, FOXK1, COIL, TPM1, FRMD1, ARHGAP21, TUBGCP3, CDYL, ANK1, MYOM2, PPP2CA, CAMSAP1, ISY1, TEKT3, NAT10, APEX1, NKX2-2, ELMOD1, KCND2, HIST1H1C, NOL8, TAF7, GRIN1, L3MBTL, POLR1A, CENPF, CDC5L, PCM1, RPS5, FNBP1, KRTAP5-6, ATF3, ID2, CEP350, JUN, PSMA3, SNTG1, MAP7, JAK2, HPGD, IFT88, SPTAN1, SERP1	1	0.905473	57.0595	GOTERM_BP_FAT	GO:0043085~positive regulation of catalytic activity	3	0.644464	CHRM1, NR4A2, NPR3	1	0.995351	100
UP_SEQ_FEATURE	domain:RRM 1	7	0.00536904	SFRS5, U2AF2, RBM15B, RBM4, IGF2BP3, RNPC3, DAZAP1	0.992091	0.911068	8.04797	Annotation Cluster 21	Enrichment Score: 2.1507459592903664							GOTERM_CC_FAT	GO:0005856~cytoskeleton	25	0.0892589	ABLIM2, TPM1, FRMD1, ARHGAP21, TUBGCP3, ANK1, MYOM2, PPP2CA, CAMSAP1, TEKT3, APEX1, ELMOD1, KCND2, GRIN1, CENPF, PCM1, FNBP1, KRTAP5-6, CEP350, PSMA3, SNTG1, JAK2, MAP7, IFT88, SPTAN1	1	0.938345	71.2957	GOTERM_BP_FAT	GO:0044093~positive regulation of molecular function	3	0.707529	CHRM1, NR4A2, NPR3	1	0.998201	100
UP_SEQ_FEATURE	domain:RRM 2	7	0.00536904	SFRS5, U2AF2, RBM15B, RBM4, IGF2BP3, RNPC3, DAZAP1	0.992091	0.911068	8.04797	Category	Term	Count	PValue	Genes	Bonferroni	Benjamini	FDR
INTERPRO	IPR012677:Nucleotide-binding, alpha-beta plait	10	0.00913465	CSTF2, SFRS5, SF3B14, U2AF2, RBM15B, RBM4, SSB, IGF2BP3, RNPC3, DAZAP1	0.990015	0.68389	12.3853	GOTERM_BP_FAT	GO:0003007~heart morphogenesis	6	0.000220922	MSX1, TBX3, GATA4, PROX1, NKX2-5, COL5A1	0.203361	0.00343883	0.349747	Annotation Cluster 24	Enrichment Score: 1.1297611975573127							Annotation Cluster 18	Enrichment Score: 0.242033984460893
INTERPRO	IPR000504:RNA recognition motif, RNP-1	10	0.00973658	CSTF2, SFRS5, SF3B14, U2AF2, RBM15B, RBM4, SSB, IGF2BP3, RNPC3, DAZAP1	0.99264	0.625567	13.1491	GOTERM_BP_FAT	GO:0035239~tube morphogenesis	6	0.0027152	TCF21, TBX3, GATA4, TFAP2A, NKX2-5, ZIC2	0.939052	0.0327579	4.2198	Category	Term	Count	PValue	Genes	Bonferroni	Benjamini	FDR	Category	Term	Count	PValue	Genes	Bonferroni	Benjamini	FDR
GOTERM_BP_FAT	GO:0008380~RNA splicing	12	0.0106677	CSTF2, SFRS5, SF3B14, SNRPN, U2AF2, LSM6, RBM15B, RBM4, MPHOSPH10, WBP11, RNPC3, LSM1	1	0.266403	16.6123	GOTERM_BP_FAT	GO:0007507~heart development	7	0.00571142	MSX1, TBX3, GATA4, SOX9, PROX1, NKX2-5, COL5A1	0.997244	0.0627152	8.68244	GOTERM_BP_FAT	GO:0048736~appendage development	7	0.00979546	WNT5A, EVX2, HOXA11, GNAS, NR2F2, PCSK5, IFT88	1	0.249043	15.4242	GOTERM_BP_FAT	GO:0007155~cell adhesion	4	0.505107	DCHS2, COL9A1, LYPD3, PCDHGA7	1	0.981281	99.9961
GOTERM_BP_FAT	GO:0016071~mRNA metabolic process	14	0.01091	CSTF2, SF3B14, RBM15B, LSM6, U2AF2, RBM4, WBP11, SSB, GDNF, ZFP36L1, SFRS5, RNPC3, POP4, LSM1	1	0.267841	16.9575	GOTERM_BP_FAT	GO:0001947~heart looping	3	0.0117873	TBX3, GATA4, NKX2-5	0.999995	0.113792	17.1406	GOTERM_BP_FAT	GO:0060173~limb development	7	0.00979546	WNT5A, EVX2, HOXA11, GNAS, NR2F2, PCSK5, IFT88	1	0.249043	15.4242	GOTERM_BP_FAT	GO:0022610~biological adhesion	4	0.505107	DCHS2, COL9A1, LYPD3, PCDHGA7	1	0.981281	99.9961
SP_PIR_KEYWORDS	mrna splicing	9	0.0212848	SFRS5, SF3B14, U2AF2, LSM6, RBM15B, RBM4, WBP11, RNPC3, LSM1	0.997187	0.413717	24.6753	GOTERM_BP_FAT	GO:0016202~regulation of striated muscle tissue development	3	0.0545781	TBX3, GATA4, NKX2-5	1	0.360895	58.9334	GOTERM_BP_FAT	GO:0035108~limb morphogenesis	6	0.0317095	WNT5A, EVX2, HOXA11, GNAS, PCSK5, IFT88	1	0.492829	42.2113	UP_SEQ_FEATURE	glycosylation site:N-linked (GlcNAc...)	10	0.73643	DCHS2, COL9A1, HTR1B, WNT16, LYPD3, CHRM1, LRP1B, LRRTM1, PCDHGA7, KLK10	1	1	100
SP_PIR_KEYWORDS	mrna processing	10	0.025977	CSTF2, SFRS5, SF3B14, U2AF2, LSM6, RBM15B, RBM4, WBP11, RNPC3, LSM1	0.999242	0.424622	29.2953	GOTERM_BP_FAT	GO:0048634~regulation of muscle development	3	0.0565337	TBX3, GATA4, NKX2-5	1	0.366893	60.2598	GOTERM_BP_FAT	GO:0035107~appendage morphogenesis	6	0.0317095	WNT5A, EVX2, HOXA11, GNAS, PCSK5, IFT88	1	0.492829	42.2113
GOTERM_MF_FAT	GO:0003723~RNA binding	21	0.0288879	CSTF2, SNRPN, SF3B14, RBM15B, LSM6, U2AF2, RBM4, SSB, RPL24, IGF2BP3, DAZAP1, ZFP36L1, FUBP1, DLX2, RPS26, SFRS5, TDRKH, POP4, RNPC3, TRUB1, LSM1	0.999989	0.805508	33.4696									GOTERM_BP_FAT	GO:0048598~embryonic morphogenesis	11	0.0551116	WNT5A, ATOH1, FGF8, HOXA3, MAFB, HOXA11, FOXF1, ZIC5, FOXE1, GNAS, IFT88	1	0.642569	61.8915	Annotation Cluster 19	Enrichment Score: 0.23550624389721692
SMART	SM00360:RRM	10	0.0307599	CSTF2, SFRS5, SF3B14, U2AF2, RBM15B, RBM4, SSB, IGF2BP3, RNPC3, DAZAP1	0.981668	0.864603	30.4298	Annotation Cluster 22	Enrichment Score: 1.8579921400815977							GOTERM_BP_FAT	GO:0051216~cartilage development	4	0.121638	WNT5A, HOXA3, HOXA11, GNAS	1	0.825885	88.999	Category	Term	Count	PValue	Genes	Bonferroni	Benjamini	FDR
GOTERM_BP_FAT	GO:0006397~mRNA processing	11	0.0485137	CSTF2, SFRS5, SF3B14, U2AF2, LSM6, RBM15B, RBM4, WBP11, POP4, RNPC3, LSM1	1	0.512386	56.931	Category	Term	Count	PValue	Genes	Bonferroni	Benjamini	FDR	GOTERM_BP_FAT	GO:0035113~embryonic appendage morphogenesis	4	0.20693	WNT5A, HOXA11, GNAS, IFT88	1	0.913044	98.0659	GOTERM_BP_FAT	GO:0042325~regulation of phosphorylation	3	0.570072	CHRM1, PRKCE, TRIB2	1	0.99063	99.9995
SP_PIR_KEYWORDS	rna-binding	14	0.0825547	CSTF2, SNRPN, SF3B14, RBM15B, LSM6, U2AF2, RBM4, SSB, IGF2BP3, DAZAP1, SFRS5, TDRKH, RNPC3, LSM1	1	0.710041	67.8519	GOTERM_BP_FAT	GO:0003007~heart morphogenesis	6	0.000220922	MSX1, TBX3, GATA4, PROX1, NKX2-5, COL5A1	0.203361	0.00343883	0.349747	GOTERM_BP_FAT	GO:0030326~embryonic limb morphogenesis	4	0.20693	WNT5A, HOXA11, GNAS, IFT88	1	0.913044	98.0659	GOTERM_BP_FAT	GO:0019220~regulation of phosphate metabolic process	3	0.587186	CHRM1, PRKCE, TRIB2	1	0.991695	99.9997
GOTERM_BP_FAT	GO:0006396~RNA processing	15	0.0867313	CSTF2, SNRPN, SF3B14, RBM15B, LSM6, U2AF2, RBM4, MPHOSPH10, WBP11, SSB, SFRS5, RNPC3, POP4, LSM1, TRUB1	1	0.643471	78.4926	GOTERM_BP_FAT	GO:0001944~vasculature development	8	0.00288083	TCF21, TBX3, EPAS1, CDX4, PROX1, NKX2-5, COL5A1, WT1	0.948627	0.0343224	4.47173	GOTERM_BP_FAT	GO:0001501~skeletal system development	8	0.291614	WNT5A, DLX1, HOXA3, MMP9, HOXA11, GNAS, NPR3, PCSK5	1	0.947099	99.7169	GOTERM_BP_FAT	GO:0051174~regulation of phosphorus metabolic process	3	0.587186	CHRM1, PRKCE, TRIB2	1	0.991695	99.9997
GOTERM_CC_FAT	GO:0030529~ribonucleoprotein complex	12	0.142428	RPS26, SNRPN, U2AF2, LSM6, RBM4, MPHOSPH10, SSB, RPL24, POP4, RNPC3, LSM1, APEX1	1	0.812076	86.768	GOTERM_BP_FAT	GO:0007507~heart development	7	0.00571142	MSX1, TBX3, GATA4, SOX9, PROX1, NKX2-5, COL5A1	0.997244	0.0627152	8.68244	GOTERM_BP_FAT	GO:0048705~skeletal system morphogenesis	3	0.624015	HOXA3, HOXA11, GNAS	1	0.996117	100
KEGG_PATHWAY	hsa03040:Spliceosome	5	0.212679	SFRS5, SF3B14, U2AF2, LSM6, WBP11	1	0.841916	93.2287	GOTERM_MF_FAT	GO:0010843~promoter binding	4	0.00834821	NR5A2, PROX1, NKX2-5, WT1	0.68289	0.119805	9.38389									Annotation Cluster 20	Enrichment Score: 0.17591919574658643
GOTERM_BP_FAT	GO:0000375~RNA splicing, via transesterification reactions	4	0.514496	CSTF2, SFRS5, SF3B14, U2AF2	1	0.981751	99.9995	GOTERM_MF_FAT	GO:0016564~transcription repressor activity	8	0.00842303	MSX1, TBX3, HELT, MXD1, PRDM16, PROX1, NKX2-5, ZNF423	0.686151	0.109422	9.46422	Annotation Cluster 25	Enrichment Score: 1.0975087500514653							Category	Term	Count	PValue	Genes	Bonferroni	Benjamini	FDR
GOTERM_BP_FAT	GO:0000398~nuclear mRNA splicing, via spliceosome	4	0.514496	CSTF2, SFRS5, SF3B14, U2AF2	1	0.981751	99.9995	GOTERM_BP_FAT	GO:0001568~blood vessel development	7	0.0105408	TBX3, EPAS1, CDX4, PROX1, NKX2-5, COL5A1, WT1	0.999982	0.105299	15.4676	Category	Term	Count	PValue	Genes	Bonferroni	Benjamini	FDR	SP_PIR_KEYWORDS	receptor	6	0.2095	HTR1B, CHRM1, LRP1B, NR4A2, GPR50, NPR3	1	0.785864	93.215
GOTERM_BP_FAT	GO:0000377~RNA splicing, via transesterification reactions with bulged adenosine as nucleophile	4	0.514496	CSTF2, SFRS5, SF3B14, U2AF2	1	0.981751	99.9995	GOTERM_BP_FAT	GO:0032583~regulation of gene-specific transcription	5	0.0185507	DLX2, GATA4, NR5A2, PROX1, NKX2-5	1	0.159354	25.6901	GOTERM_BP_FAT	GO:0048568~embryonic organ development	8	0.0402254	ATOH1, HOXA3, MAFB, FOXF1, FOXE1, GNAS, PCSK5, FOXD3	1	0.550944	50.2774	GOTERM_BP_FAT	GO:0007186~G-protein coupled receptor protein signaling pathway	4	0.387528	HTR1B, CHRM1, GPR50, NPR3	1	0.946909	99.9156
								GOTERM_BP_FAT	GO:0051153~regulation of striated muscle cell differentiation	3	0.0241061	TBX3, PROX1, NKX2-5	1	0.197686	32.0868	GOTERM_BP_FAT	GO:0048598~embryonic morphogenesis	11	0.0551116	WNT5A, ATOH1, FGF8, HOXA3, MAFB, HOXA11, FOXF1, ZIC5, FOXE1, GNAS, IFT88	1	0.642569	61.8915	GOTERM_CC_FAT	GO:0031226~intrinsic to plasma membrane	4	0.518661	HTR1B, LYPD3, CHRM1, GPR50	1	0.996012	99.9459
Annotation Cluster 19	Enrichment Score: 1.3601281926918063							GOTERM_BP_FAT	GO:0043193~positive regulation of gene-specific transcription	4	0.0279568	GATA4, NR5A2, PROX1, NKX2-5	1	0.220715	36.2138	GOTERM_BP_FAT	GO:0048562~embryonic organ morphogenesis	5	0.230001	ATOH1, HOXA3, MAFB, FOXE1, GNAS	1	0.929128	98.8298	SP_PIR_KEYWORDS	glycoprotein	12	0.547486	DCHS2, COL9A1, COL9A2, HTR1B, WNT16, LYPD3, CHRM1, LRP1B, LRRTM1, PCDHGA7, KLK10, NPR3	1	0.976309	99.9885
Category	Term	Count	PValue	Genes	Bonferroni	Benjamini	FDR	GOTERM_BP_FAT	GO:0051147~regulation of muscle cell differentiation	3	0.034812	TBX3, PROX1, NKX2-5	1	0.26016	42.9853									SP_PIR_KEYWORDS	cell membrane	6	0.637883	IRS4, HTR1B, LYPD3, CHRM1, PCDHGA7, GPR50	1	0.988197	99.9991
GOTERM_BP_FAT	GO:0014031~mesenchymal cell development	6	0.00158849	NOTCH1, BCL2, GBX2, FOXC1, GDNF, NFATC1	0.93926	0.0951996	2.65692	GOTERM_BP_FAT	GO:0008284~positive regulation of cell proliferation	6	0.202532	ODC1, HRH3, TBX3, LHX1, PROX1, NKX2-5	1	0.768838	97.2366	Annotation Cluster 26	Enrichment Score: 1.062108424509995							UP_SEQ_FEATURE	glycosylation site:N-linked (GlcNAc...)	10	0.73643	DCHS2, COL9A1, HTR1B, WNT16, LYPD3, CHRM1, LRP1B, LRRTM1, PCDHGA7, KLK10	1	1	100
GOTERM_BP_FAT	GO:0048762~mesenchymal cell differentiation	6	0.00158849	NOTCH1, BCL2, GBX2, FOXC1, GDNF, NFATC1	0.93926	0.0951996	2.65692	GOTERM_BP_FAT	GO:0048514~blood vessel morphogenesis	4	0.213041	EPAS1, PROX1, NKX2-5, WT1	1	0.779627	97.7608	Category	Term	Count	PValue	Genes	Bonferroni	Benjamini	FDR	UP_SEQ_FEATURE	topological domain:Extracellular	6	0.78948	HTR1B, CHRM1, LRP1B, PCDHGA7, GPR50, NPR3	1	1	100
GOTERM_BP_FAT	GO:0060485~mesenchyme development	6	0.00174732	NOTCH1, BCL2, GBX2, FOXC1, GDNF, NFATC1	0.954108	0.100807	2.91889									GOTERM_BP_FAT	GO:0042445~hormone metabolic process	5	0.0594532	LRAT, CRH, FOXE1, PCSK5, LHB	1	0.660508	64.7642	GOTERM_CC_FAT	GO:0016021~integral to membrane	10	0.826513	DCHS2, HTR1B, LYPD3, CHRM1, LRP1B, LRRTM1, GEFT, PCDHGA7, GPR50, NPR3	1	0.998106	100
GOTERM_BP_FAT	GO:0014032~neural crest cell development	3	0.109387	GBX2, FOXC1, GDNF	1	0.701147	85.9462	Annotation Cluster 23	Enrichment Score: 1.6007361739716972							GOTERM_BP_FAT	GO:0010817~regulation of hormone levels	6	0.0669843	LRAT, CRH, FOXE1, GHSR, PCSK5, LHB	1	0.678486	69.2698	GOTERM_CC_FAT	GO:0031224~intrinsic to membrane	10	0.866502	DCHS2, HTR1B, LYPD3, CHRM1, LRP1B, LRRTM1, GEFT, PCDHGA7, GPR50, NPR3	1	0.998527	100
GOTERM_BP_FAT	GO:0014033~neural crest cell differentiation	3	0.109387	GBX2, FOXC1, GDNF	1	0.701147	85.9462	Category	Term	Count	PValue	Genes	Bonferroni	Benjamini	FDR	GOTERM_BP_FAT	GO:0034754~cellular hormone metabolic process	3	0.163503	LRAT, CRH, LHB	1	0.885505	95.2083	UP_SEQ_FEATURE	topological domain:Cytoplasmic	7	0.889773	HTR1B, CHRM1, LRP1B, LRRTM1, PCDHGA7, GPR50, NPR3	1	1	100
UP_SEQ_FEATURE	compositionally biased region:Poly-Arg	5	0.251347	NOTCH1, KIAA0182, GBX2, FOXC1, BAT2	1	0.999908	98.9019	GOTERM_BP_FAT	GO:0007530~sex determination	5	1.08236e-05	DHH, TCF21, FOXL2, SOX9, WT1	0.0110758	0.00030097	0.0171619									UP_SEQ_FEATURE	transmembrane region	9	0.975751	DCHS2, HTR1B, CHRM1, LRP1B, LRRTM1, GEFT, PCDHGA7, GPR50, NPR3	1	1	100
GOTERM_BP_FAT	GO:0001568~blood vessel development	6	0.316768	ZFP36L1, RECK, NOTCH1, GBX2, FOXC1, NR2F2	1	0.925088	99.8423	GOTERM_BP_FAT	GO:0007548~sex differentiation	7	0.000977475	DHH, TCF21, FOXL2, TBX3, SOX9, WNT7A, WT1	0.634436	0.0133279	1.53881	Annotation Cluster 27	Enrichment Score: 1.058493877488858							SP_PIR_KEYWORDS	transmembrane	9	0.976543	DCHS2, HTR1B, CHRM1, LRP1B, LRRTM1, GEFT, PCDHGA7, GPR50, NPR3	1	0.999999	100
GOTERM_BP_FAT	GO:0001944~vasculature development	6	0.339947	ZFP36L1, RECK, NOTCH1, GBX2, FOXC1, NR2F2	1	0.93685	99.9121	GOTERM_BP_FAT	GO:0048608~reproductive structure development	6	0.00262375	DHH, TCF21, FOXL2, SOX9, WNT7A, WT1	0.933022	0.0320462	4.08043	Category	Term	Count	PValue	Genes	Bonferroni	Benjamini	FDR	SP_PIR_KEYWORDS	membrane	11	0.994865	IRS4, DCHS2, HTR1B, LYPD3, CHRM1, LRP1B, LRRTM1, GEFT, PCDHGA7, GPR50, NPR3	1	1	100
GOTERM_BP_FAT	GO:0048514~blood vessel morphogenesis	5	0.401929	ZFP36L1, NOTCH1, GBX2, FOXC1, NR2F2	1	0.961086	99.9835	GOTERM_BP_FAT	GO:0046546~development of primary male sexual characteristics	4	0.0129665	DHH, TBX3, SOX9, WT1	0.999999	0.122244	18.6946	GOTERM_BP_FAT	GO:0007517~muscle organ development	10	0.00651104	LAMA2, LBX1, BVES, FOXK1, SMAD7, CENPF, VGLL2, NR2F2, TPM1, SERP1	0.999994	0.192504	10.5212
								GOTERM_BP_FAT	GO:0003006~reproductive developmental process	7	0.0143005	DHH, TCF21, FOXL2, TBX3, SOX9, WNT7A, WT1	1	0.132824	20.4197	GOTERM_BP_FAT	GO:0014706~striated muscle tissue development	4	0.307033	SMAD7, VGLL2, NR2F2, TPM1	1	0.952263	99.8054	Annotation Cluster 21	Enrichment Score: 0.10423094801252583
Annotation Cluster 20	Enrichment Score: 1.344267115542366							GOTERM_BP_FAT	GO:0045137~development of primary sexual characteristics	5	0.0155339	DHH, FOXL2, TBX3, SOX9, WT1	1	0.139773	21.9841	GOTERM_BP_FAT	GO:0060537~muscle tissue development	4	0.333951	SMAD7, VGLL2, NR2F2, TPM1	1	0.958556	99.9008	Category	Term	Count	PValue	Genes	Bonferroni	Benjamini	FDR
Category	Term	Count	PValue	Genes	Bonferroni	Benjamini	FDR	GOTERM_BP_FAT	GO:0046661~male sex differentiation	4	0.0176843	DHH, TBX3, SOX9, WT1	1	0.155018	24.643									GOTERM_CC_FAT	GO:0005856~cytoskeleton	4	0.660404	TRIM67, ACTA1, CHRM1, TRIB2	1	0.992524	99.9985
GOTERM_BP_FAT	GO:0006366~transcription from RNA polymerase II promoter	10	0.0207022	FUBP1, CEBPA, POU6F2, AFF4, GTF2H4, TRIM24, APEX1, MYC, CBFB, NFATC1	1	0.35186	29.8372	GOTERM_BP_FAT	GO:0008406~gonad development	4	0.0526194	DHH, FOXL2, SOX9, WT1	1	0.354653	57.5632	Annotation Cluster 28	Enrichment Score: 1.0403766861628658							SP_PIR_KEYWORDS	cytoskeleton	3	0.674144	TRIM67, ACTA1, TRIB2	1	0.991133	99.9997
GOTERM_BP_FAT	GO:0006351~transcription, DNA-dependent	10	0.066244	FUBP1, CEBPA, POU6F2, AFF4, GTF2H4, TRIM24, APEX1, MYC, CBFB, NFATC1	1	0.583192	68.6823	GOTERM_BP_FAT	GO:0008584~male gonad development	3	0.0585135	DHH, SOX9, WT1	1	0.375016	61.5618	Category	Term	Count	PValue	Genes	Bonferroni	Benjamini	FDR	GOTERM_CC_FAT	GO:0043232~intracellular non-membrane-bounded organelle	6	0.829792	MEIS2, TRIM67, ACTA1, CHRM1, NKX2-2, TRIB2	1	0.997572	100
GOTERM_BP_FAT	GO:0032774~RNA biosynthetic process	10	0.0676137	FUBP1, CEBPA, POU6F2, AFF4, GTF2H4, TRIM24, APEX1, MYC, CBFB, NFATC1	1	0.588292	69.4515	GOTERM_BP_FAT	GO:0032504~multicellular organism reproduction	4	0.716109	DHH, FOXL2, SPATA18, WT1	1	0.998513	100	GOTERM_BP_FAT	GO:0048584~positive regulation of response to stimulus	8	0.0290579	AGTR1, CDH13, CD247, CRH, MALT1, JAK2, F7, GHSR	1	0.470546	39.4583	GOTERM_CC_FAT	GO:0043228~non-membrane-bounded organelle	6	0.829792	MEIS2, TRIM67, ACTA1, CHRM1, NKX2-2, TRIB2	1	0.997572	100
								GOTERM_BP_FAT	GO:0048609~reproductive process in a multicellular organism	4	0.716109	DHH, FOXL2, SPATA18, WT1	1	0.998513	100	GOTERM_BP_FAT	GO:0048520~positive regulation of behavior	3	0.0796416	CDH13, CRH, F7	1	0.724506	75.6435	SP_PIR_KEYWORDS	cytoplasm	7	0.982527	TRIM67, ACTA1, SPATA18, GEFT, LIN28B, WT1, TRIB2	1	0.999999	100
Annotation Cluster 21	Enrichment Score: 1.2234150173373701							GOTERM_BP_FAT	GO:0007276~gamete generation	3	0.803124	DHH, SPATA18, WT1	1	0.999746	100	GOTERM_BP_FAT	GO:0050795~regulation of behavior	3	0.149713	CDH13, CRH, F7	1	0.865829	93.671
Category	Term	Count	PValue	Genes	Bonferroni	Benjamini	FDR	GOTERM_BP_FAT	GO:0019953~sexual reproduction	3	0.864663	DHH, SPATA18, WT1	1	0.999952	100	SP_PIR_KEYWORDS	cleavage on pair of basic residues	6	0.198989	CDH13, CRH, GNAS, F7, INSR, PCSK5	1	0.965262	94.9779	Annotation Cluster 22	Enrichment Score: 0.0016312227212503022
UP_SEQ_FEATURE	DNA-binding region:Fork-head	4	0.0375489	FOXA2, FOXA1, FOXC1, FOXD3	1	0.967956	44.9252																	Category	Term	Count	PValue	Genes	Bonferroni	Benjamini	FDR
INTERPRO	IPR001766:Transcription factor, fork head	4	0.0411427	FOXA2, FOXA1, FOXC1, FOXD3	1	0.878647	45.4114	Annotation Cluster 24	Enrichment Score: 1.5965021039594176							Annotation Cluster 29	Enrichment Score: 1.0124628059840726							GOTERM_MF_FAT	GO:0005524~ATP binding	3	0.992204	ACTA1, PRKCE, TRIB2	1	1	100
INTERPRO	IPR018122:Transcription factor, fork head, conserved site	4	0.0411427	FOXA2, FOXA1, FOXC1, FOXD3	1	0.878647	45.4114	Category	Term	Count	PValue	Genes	Bonferroni	Benjamini	FDR	Category	Term	Count	PValue	Genes	Bonferroni	Benjamini	FDR	GOTERM_MF_FAT	GO:0032559~adenyl ribonucleotide binding	3	0.992922	ACTA1, PRKCE, TRIB2	1	1	100
SMART	SM00339:FH	4	0.0671216	FOXA2, FOXA1, FOXC1, FOXD3	0.999863	0.831142	55.376	GOTERM_CC_FAT	GO:0005581~collagen	4	0.000578356	COL9A1, COL9A2, COL4A2, COL5A1	0.0567565	0.0287928	0.641261	GOTERM_BP_FAT	GO:0032103~positive regulation of response to external stimulus	5	0.0105554	AGTR1, CDH13, JAK2, F7, GHSR	1	0.262081	16.5221	GOTERM_MF_FAT	GO:0030554~adenyl nucleotide binding	3	0.994928	ACTA1, PRKCE, TRIB2	1	1	100
INTERPRO	IPR011991:Winged helix repressor DNA-binding	6	0.179011	SHPRH, FOXA2, FOXA1, PAX6, SSB, FOXD3	1	0.992923	94.1692	SP_PIR_KEYWORDS	triple helix	4	0.000787118	COL9A1, COL9A2, COL4A2, COL5A1	0.12529	0.0110932	0.956049	GOTERM_BP_FAT	GO:0048584~positive regulation of response to stimulus	8	0.0290579	AGTR1, CDH13, CD247, CRH, MALT1, JAK2, F7, GHSR	1	0.470546	39.4583	GOTERM_MF_FAT	GO:0001883~purine nucleoside binding	3	0.995379	ACTA1, PRKCE, TRIB2	1	1	100
								SP_PIR_KEYWORDS	hydroxylysine	4	0.000787118	COL9A1, COL9A2, COL4A2, COL5A1	0.12529	0.0110932	0.956049	GOTERM_BP_FAT	GO:0032101~regulation of response to external stimulus	6	0.0534932	AGTR1, CDH13, GRIN1, JAK2, F7, GHSR	1	0.634954	60.7653	GOTERM_MF_FAT	GO:0001882~nucleoside binding	3	0.995544	ACTA1, PRKCE, TRIB2	1	1	100
Annotation Cluster 22	Enrichment Score: 1.1763144478060543							SP_PIR_KEYWORDS	hydroxylation	5	0.00081041	COL9A1, COL9A2, COL4A2, EPAS1, COL5A1	0.128749	0.010546	0.984213	GOTERM_BP_FAT	GO:0050727~regulation of inflammatory response	3	0.213224	AGTR1, JAK2, GHSR	1	0.917716	98.3112	GOTERM_MF_FAT	GO:0032555~purine ribonucleotide binding	3	0.998343	ACTA1, PRKCE, TRIB2	1	1	100
Category	Term	Count	PValue	Genes	Bonferroni	Benjamini	FDR	SP_PIR_KEYWORDS	hydroxyproline	4	0.00132622	COL9A1, COL9A2, COL4A2, COL5A1	0.201968	0.0159856	1.606	GOTERM_BP_FAT	GO:0010647~positive regulation of cell communication	8	0.233937	LAMA2, CDH13, MIER1, MALT1, JAK2, F7, GHSR, INSR	1	0.928669	98.9275	GOTERM_MF_FAT	GO:0032553~ribonucleotide binding	3	0.998343	ACTA1, PRKCE, TRIB2	1	1	100
GOTERM_MF_FAT	GO:0016563~transcription activator activity	17	0.00269879	FOXA2, TBX5, RBM4, TRIM24, NR4A3, PRDM16, CBFB, MYT1L, MLL5, NOTCH1, BCL2, POU3F3, FOXC1, MAML3, APEX1, ING1, NFATC1	0.652383	0.190494	3.6872	SP_PIR_KEYWORDS	signal	30	0.0116999	DHH, GLB1L, GRIK2, C20ORF103, PCDHGC3, PCDHGA4, NRN1, PCDHGA3, COL9A1, COL9A2, BDNF, TEPP, TPO, PRSS16, IFNA8, NXPH1, ISLR2, PCDHGA12, COL4A2, PCDHGA10, PCDHGA11, FZD1, COL5A1, PCDHGB5, PCDHGB4, CXCL14, SEMA4C, SLITRK5, WNT7A, ADAMTS5, SEL1L	0.86476	0.111027	13.3747	GOTERM_BP_FAT	GO:0009967~positive regulation of signal transduction	7	0.276466	CDH13, MIER1, MALT1, JAK2, F7, GHSR, INSR	1	0.943836	99.5943	GOTERM_MF_FAT	GO:0017076~purine nucleotide binding	3	0.998848	ACTA1, PRKCE, TRIB2	1	1	100
GOTERM_MF_FAT	GO:0008134~transcription factor binding	14	0.131099	CEBPA, TBX5, RBM4, FOSB, TRIM24, PRDM16, CBFB, MLL5, BCL2, BCL11A, FOXC1, MAML3, NR2F2, APEX1	1	0.92694	85.8234	SP_PIR_KEYWORDS	heterotrimer	3	0.0117042	COL9A1, COL9A2, COL4A2	0.864861	0.105233	13.3793	GOTERM_BP_FAT	GO:0051046~regulation of secretion	5	0.36153	AGTR1, CRH, JAK2, GHSR, SERP1	1	0.966576	99.9517	GOTERM_MF_FAT	GO:0000166~nucleotide binding	3	0.999778	ACTA1, PRKCE, TRIB2	1	1	100
GOTERM_MF_FAT	GO:0003713~transcription coactivator activity	7	0.175564	MLL5, RBM4, MAML3, TRIM24, PRDM16, APEX1, CBFB	1	0.951169	93.1699	UP_SEQ_FEATURE	signal peptide	30	0.0127286	DHH, GLB1L, GRIK2, C20ORF103, PCDHGC3, PCDHGA4, NRN1, PCDHGA3, COL9A1, COL9A2, BDNF, TEPP, TPO, PRSS16, IFNA8, NXPH1, ISLR2, PCDHGA12, COL4A2, PCDHGA10, PCDHGA11, FZD1, COL5A1, PCDHGB5, PCDHGB4, CXCL14, SEMA4C, SLITRK5, WNT7A, ADAMTS5, SEL1L	0.995735	0.304979	16.4994
GOTERM_MF_FAT	GO:0003712~transcription cofactor activity	9	0.317349	MLL5, BCL11A, RBM4, MAML3, TRIM24, NR2F2, PRDM16, APEX1, CBFB	1	0.980321	99.5045	SP_PIR_KEYWORDS	extracellular matrix	6	0.0139304	COL9A1, COL9A2, COL4A2, WNT7A, ADAMTS5, COL5A1	0.907895	0.112406	15.73	Annotation Cluster 30	Enrichment Score: 0.9834523813157974
								GOTERM_CC_FAT	GO:0005578~proteinaceous extracellular matrix	6	0.0169358	COL9A1, COL9A2, COL4A2, WNT7A, ADAMTS5, COL5A1	0.821856	0.35033	17.2992	Category	Term	Count	PValue	Genes	Bonferroni	Benjamini	FDR
Annotation Cluster 23	Enrichment Score: 1.1642852787459967							INTERPRO	IPR008160:Collagen triple helix repeat	4	0.0172749	COL9A1, COL9A2, COL4A2, COL5A1	0.964767	0.262258	19.5034	GOTERM_BP_FAT	GO:0009306~protein secretion	3	0.0576637	ARFGAP3, GNAS, PCSK5	1	0.652491	63.6057
Category	Term	Count	PValue	Genes	Bonferroni	Benjamini	FDR	GOTERM_CC_FAT	GO:0044420~extracellular matrix part	4	0.0175234	COL9A1, COL9A2, COL4A2, COL5A1	0.832296	0.300305	17.8473	GOTERM_BP_FAT	GO:0032940~secretion by cell	7	0.108511	CPLX2, ARFGAP3, ANK1, RAB14, GNAS, GHSR, PCSK5	1	0.797094	85.8398
GOTERM_CC_FAT	GO:0031981~nuclear lumen	32	0.0216771	RBM15B, FKBP4, GLIS1, RBM4, PDLIM3, WBP11, PRDM16, GLI3, CD2AP, DAZAP1, ZNF174, CCNE2, FUBP1, MLL5, MAML3, MYC, APEX1, CEBPA, ELP3, RBBP4, CSTF2, GTF2H4, MPHOSPH10, SSB, PPP1CC, MCM6, CDC25B, DUSP4, CCND1, POP4, EP400, DUSP6	0.997423	0.949233	25.0597	SP_PIR_KEYWORDS	collagen	4	0.0184855	COL9A1, COL9A2, COL4A2, COL5A1	0.958078	0.140191	20.3581	GOTERM_BP_FAT	GO:0046903~secretion	8	0.179171	CPLX2, ARFGAP3, ANK1, RAB14, GNAS, GHSR, PCSK5, IFT88	1	0.898791	96.5267
GOTERM_CC_FAT	GO:0005654~nucleoplasm	21	0.0413178	CEBPA, ELP3, RBBP4, RBM15B, RBM4, GTF2H4, WBP11, PPP1CC, PRDM16, GLI3, MCM6, CDC25B, CCNE2, DUSP4, MLL5, CCND1, MAML3, APEX1, MYC, EP400, DUSP6	0.99999	0.943261	42.6174	GOTERM_CC_FAT	GO:0031012~extracellular matrix	6	0.022637	COL9A1, COL9A2, COL4A2, WNT7A, ADAMTS5, COL5A1	0.900997	0.319845	22.4788
GOTERM_CC_FAT	GO:0043233~organelle lumen	35	0.0786428	RBM15B, FKBP4, GLIS1, RBM4, PDLIM3, WBP11, PRDM16, GLI3, ACAT1, CD2AP, DAZAP1, ZNF174, CCNE2, FUBP1, MLL5, MAML3, HSPA5, MYC, APEX1, FN1, CEBPA, ELP3, RBBP4, CSTF2, GTF2H4, MPHOSPH10, SSB, PPP1CC, MCM6, CDC25B, DUSP4, CCND1, POP4, EP400, DUSP6	1	0.915873	65.9781	GOTERM_MF_FAT	GO:0005201~extracellular matrix structural constituent	4	0.0250996	COL9A1, COL9A2, COL4A2, COL5A1	0.969271	0.271373	25.8285	Annotation Cluster 31	Enrichment Score: 0.9781841904810199
GOTERM_CC_FAT	GO:0005730~nucleolus	16	0.0883303	ELP3, CSTF2, RBM15B, FKBP4, GLIS1, RBM4, MPHOSPH10, PDLIM3, SSB, CD2AP, GLI3, DAZAP1, ZNF174, FUBP1, POP4, EP400	1	0.919169	70.3972	GOTERM_CC_FAT	GO:0044421~extracellular region part	9	0.0785573	DHH, COL9A1, COL9A2, COL4A2, CXCL14, IFNA8, WNT7A, ADAMTS5, COL5A1	0.999742	0.60074	59.7392	Category	Term	Count	PValue	Genes	Bonferroni	Benjamini	FDR
GOTERM_CC_FAT	GO:0031974~membrane-enclosed lumen	35	0.0943614	RBM15B, FKBP4, GLIS1, RBM4, PDLIM3, WBP11, PRDM16, GLI3, ACAT1, CD2AP, DAZAP1, ZNF174, CCNE2, FUBP1, MLL5, MAML3, HSPA5, MYC, APEX1, FN1, CEBPA, ELP3, RBBP4, CSTF2, GTF2H4, MPHOSPH10, SSB, PPP1CC, MCM6, CDC25B, DUSP4, CCND1, POP4, EP400, DUSP6	1	0.854221	72.8738	GOTERM_BP_FAT	GO:0043062~extracellular structure organization	4	0.125167	COL4A2, LMX1B, WNT7A, COL5A1	1	0.610335	88.0025	SP_PIR_KEYWORDS	Acyltransferase	6	0.0612382	LRAT, CDYL, NAT10, LIPT1, AGPAT3, ACAA1	1	0.738076	57.342
GOTERM_CC_FAT	GO:0070013~intracellular organelle lumen	34	0.096045	RBM15B, FKBP4, GLIS1, RBM4, PDLIM3, WBP11, PRDM16, GLI3, ACAT1, CD2AP, DAZAP1, ZNF174, CCNE2, FUBP1, MLL5, MAML3, HSPA5, MYC, APEX1, CEBPA, ELP3, RBBP4, CSTF2, GTF2H4, MPHOSPH10, SSB, PPP1CC, MCM6, CDC25B, DUSP4, CCND1, POP4, EP400, DUSP6	1	0.839751	73.5301	GOTERM_CC_FAT	GO:0005576~extracellular region	13	0.225768	DHH, COL4A2, GLB1L, COL5A1, COL9A1, BDNF, COL9A2, CXCL14, TEPP, IFNA8, WNT7A, ADAMTS5, NXPH1	1	0.842136	94.1893	GOTERM_MF_FAT	GO:0008080~N-acetyltransferase activity	4	0.0964924	CDYL, SUPT7L, NAT10, AGPAT3	1	0.897455	75.7649
GOTERM_CC_FAT	GO:0044451~nucleoplasm part	13	0.125553	CEBPA, ELP3, RBBP4, RBM4, GTF2H4, WBP11, PRDM16, PPP1CC, GLI3, MLL5, MAML3, MYC, EP400	1	0.85349	82.8988	SP_PIR_KEYWORDS	Secreted	13	0.288235	DHH, COL4A2, GLB1L, COL5A1, COL9A1, BDNF, COL9A2, CXCL14, TEPP, IFNA8, WNT7A, ADAMTS5, NXPH1	1	0.845035	98.4204	GOTERM_MF_FAT	GO:0016410~N-acyltransferase activity	4	0.14165	CDYL, SUPT7L, NAT10, AGPAT3	1	0.954289	88.1585
								GOTERM_MF_FAT	GO:0005198~structural molecule activity	5	0.688194	COL9A1, COL9A2, COL4A2, KRT27, COL5A1	1	0.998315	99.9999	GOTERM_MF_FAT	GO:0016407~acetyltransferase activity	4	0.14606	CDYL, SUPT7L, NAT10, AGPAT3	1	0.94495	88.9806
Annotation Cluster 24	Enrichment Score: 1.1376716948958896							SP_PIR_KEYWORDS	disulfide bond	13	0.937976	COL4A2, FZD1, COL9A1, BDNF, COL9A2, CXCL14, SEMA4C, TPO, IFNA8, CACNA1F, ADAMTS5, ISLR2, SEL1L	1	0.999997	100
Category	Term	Count	PValue	Genes	Bonferroni	Benjamini	FDR	UP_SEQ_FEATURE	disulfide bond	12	0.956076	COL9A1, COL9A2, BDNF, COL4A2, CXCL14, FZD1, SEMA4C, TPO, IFNA8, ADAMTS5, ISLR2, SEL1L	1	1	100	Annotation Cluster 32	Enrichment Score: 0.893713407269692
INTERPRO	IPR006649:Like-Sm ribonucleoprotein, eukaryotic and archaea-type, core	3	0.0378358	SNRPN, LSM6, LSM1	1	0.883674	42.6351	SP_PIR_KEYWORDS	coiled coil	8	0.959291	COL9A1, COL9A2, COL4A2, KRT27, SPATA18, PLVAP, KNDC1, COL5A1	1	0.999999	100	Category	Term	Count	PValue	Genes	Bonferroni	Benjamini	FDR
INTERPRO	IPR001163:Like-Sm ribonucleoprotein, core	3	0.0464557	SNRPN, LSM6, LSM1	1	0.885925	49.6113									UP_SEQ_FEATURE	DNA-binding region:Fork-head	4	0.0375489	FOXK1, FOXF1, FOXE1, FOXD3	1	0.99535	44.6462
SMART	SM00651:Sm	3	0.0544318	SNRPN, LSM6, LSM1	0.999226	0.83321	47.7949	Annotation Cluster 25	Enrichment Score: 1.5540117684647003							INTERPRO	IPR018122:Transcription factor, fork head, conserved site	3	0.174249	FOXK1, FOXE1, FOXD3	1	0.999743	93.7391
SP_PIR_KEYWORDS	ribonucleoprotein	7	0.294115	RPS26, SNRPN, LSM6, MPHOSPH10, SSB, RPL24, LSM1	1	0.873448	98.9821	Category	Term	Count	PValue	Genes	Bonferroni	Benjamini	FDR	INTERPRO	IPR001766:Transcription factor, fork head	3	0.174249	FOXK1, FOXE1, FOXD3	1	0.999743	93.7391
								GOTERM_BP_FAT	GO:0007517~muscle organ development	7	0.00521968	FOXL2, MSX1, GSC, PAX7, ALX4, PROX1, NKX2-5	0.995416	0.0580797	7.96366	SMART	SM00339:FH	3	0.233457	FOXK1, FOXE1, FOXD3	1	0.992261	95.4387
Annotation Cluster 25	Enrichment Score: 1.0936908585738179							GOTERM_BP_FAT	GO:0014706~striated muscle tissue development	4	0.0609159	FOXL2, PAX7, PROX1, NKX2-5	1	0.385079	63.088
Category	Term	Count	PValue	Genes	Bonferroni	Benjamini	FDR	GOTERM_BP_FAT	GO:0060537~muscle tissue development	4	0.0684842	FOXL2, PAX7, PROX1, NKX2-5	1	0.417681	67.5331	Annotation Cluster 33	Enrichment Score: 0.882491033485615
GOTERM_BP_FAT	GO:0003006~reproductive developmental process	10	0.0223309	CCND1, HOXA13, FKBP4, BCL2, FOXA1, AFF4, ROR2, FOXC1, CDC25B, GJB2	1	0.354214	31.7878									Category	Term	Count	PValue	Genes	Bonferroni	Benjamini	FDR
GOTERM_BP_FAT	GO:0007548~sex differentiation	7	0.0288188	CCND1, HOXA13, FKBP4, BCL2, ROR2, FOXC1, GJB2	1	0.402648	39.0629	Annotation Cluster 26	Enrichment Score: 1.3149627994157829							GOTERM_MF_FAT	GO:0043566~structure-specific DNA binding	7	0.0377723	ATOH1, CDX2, BLM, JUN, FOXE1, WBP11, FOXD3	1	0.822433	41.5989
GOTERM_BP_FAT	GO:0046661~male sex differentiation	5	0.0307833	CCND1, HOXA13, FKBP4, BCL2, GJB2	1	0.41426	41.1175	Category	Term	Count	PValue	Genes	Bonferroni	Benjamini	FDR	GOTERM_MF_FAT	GO:0003690~double-stranded DNA binding	5	0.0849867	CDX2, BLM, JUN, FOXE1, FOXD3	1	0.908565	71.0794
GOTERM_BP_FAT	GO:0007346~regulation of mitotic cell cycle	7	0.0419744	CCND1, HOXA13, CDKN2B, BCL2, FOXC1, RPL24, MYC	1	0.484579	51.6328	UP_SEQ_FEATURE	DNA-binding region:HMG box	3	0.0278898	SOX21, SOX1, SOX9	0.999994	0.488003	32.8439	GOTERM_CC_FAT	GO:0000228~nuclear chromosome	3	0.701459	CDX2, BLM, JUN	1	0.992808	100
GOTERM_BP_FAT	GO:0046546~development of primary male sexual characteristics	4	0.0893259	CCND1, HOXA13, BCL2, GJB2	1	0.652456	79.5045	INTERPRO	IPR000910:High mobility group, HMG1/HMG2	3	0.0463223	SOX21, SOX1, SOX9	0.999889	0.478196	44.5952
GOTERM_BP_FAT	GO:0048608~reproductive structure development	5	0.122525	CCND1, HOXA13, BCL2, FOXA1, FOXC1	1	0.729788	89.0738	SMART	SM00398:HMG	3	0.0878772	SOX21, SOX1, SOX9	0.993036	0.508142	59.3875	Annotation Cluster 34	Enrichment Score: 0.8243375415446006
GOTERM_BP_FAT	GO:0045137~development of primary sexual characteristics	5	0.12567	CCND1, HOXA13, BCL2, FOXC1, GJB2	1	0.731425	89.7187									Category	Term	Count	PValue	Genes	Bonferroni	Benjamini	FDR
GOTERM_BP_FAT	GO:0048610~reproductive cellular process	5	0.249137	CCND1, BCL2, AFF4, FOXC1, CDC25B	1	0.875847	99.2199	Annotation Cluster 27	Enrichment Score: 1.2011785052741124							GOTERM_BP_FAT	GO:0042326~negative regulation of phosphorylation	5	0.00628578	CDKN1B, SMAD7, JUN, PPP2CA, INSR	0.99999	0.189537	10.1753
GOTERM_BP_FAT	GO:0008406~gonad development	3	0.503534	CCND1, BCL2, FOXC1	1	0.979849	99.9993	Category	Term	Count	PValue	Genes	Bonferroni	Benjamini	FDR	GOTERM_BP_FAT	GO:0010563~negative regulation of phosphorus metabolic process	5	0.00824014	CDKN1B, SMAD7, JUN, PPP2CA, INSR	1	0.230101	13.1348
								UP_SEQ_FEATURE	cross-link:Glycyl lysine isopeptide (Lys-Gly) (interchain with G-Cter in SUMO)	4	0.0158168	FOXL2, MSX1, TFAP2A, WT1	0.998877	0.345895	20.1016	GOTERM_BP_FAT	GO:0045936~negative regulation of phosphate metabolic process	5	0.00824014	CDKN1B, SMAD7, JUN, PPP2CA, INSR	1	0.230101	13.1348
Annotation Cluster 26	Enrichment Score: 1.0667320841214765							SP_PIR_KEYWORDS	isopeptide bond	5	0.11873	FOXL2, MSX1, GRIK2, TFAP2A, WT1	1	0.548777	78.6036	GOTERM_BP_FAT	GO:0001933~negative regulation of protein amino acid phosphorylation	4	0.012428	SMAD7, JUN, PPP2CA, INSR	1	0.286168	19.1704
Category	Term	Count	PValue	Genes	Bonferroni	Benjamini	FDR	SP_PIR_KEYWORDS	ubl conjugation	7	0.132674	FOXL2, MSX1, EPAS1, GRIK2, TFAP2A, WT1, EPN1	1	0.578616	82.387	GOTERM_BP_FAT	GO:0032270~positive regulation of cellular protein metabolic process	9	0.0380618	AGTR1, SMAD7, BTRC, PSMA3, PRKAG2, BARHL2, JAK2, INSR, IFT88	1	0.546305	48.335
GOTERM_BP_FAT	GO:0050954~sensory perception of mechanical stimulus	6	0.0223234	SPRY2, CDKN1B, ITGA2, CHRNB2, MYC, GJB2	1	0.357247	31.7789									GOTERM_BP_FAT	GO:0001932~regulation of protein amino acid phosphorylation	7	0.0399754	SMAD7, JUN, PPP2CA, PRKAG2, JAK2, PRKCE, INSR	1	0.552502	50.0565
GOTERM_BP_FAT	GO:0050890~cognition	13	0.0474228	POU6F2, RP2, PAX6, CTNND2, ITGA2, GJB2, SPRY2, CDKN1B, RASGRF1, NR2F6, CHRNB2, CLN8, MYC	1	0.515902	56.0869	Annotation Cluster 28	Enrichment Score: 1.190127886905411							GOTERM_BP_FAT	GO:0051247~positive regulation of protein metabolic process	9	0.0475922	AGTR1, SMAD7, BTRC, PSMA3, PRKAG2, BARHL2, JAK2, INSR, IFT88	1	0.60586	56.388
GOTERM_BP_FAT	GO:0007600~sensory perception	11	0.0476046	SPRY2, CDKN1B, RP2, POU6F2, PAX6, NR2F6, ITGA2, CHRNB2, CLN8, MYC, GJB2	1	0.514316	56.2286	Category	Term	Count	PValue	Genes	Bonferroni	Benjamini	FDR	GOTERM_BP_FAT	GO:0031399~regulation of protein modification process	10	0.0530986	SMAD7, JUN, BTRC, PPP2CA, TAF7, PSMA3, PRKAG2, JAK2, PRKCE, INSR	1	0.635851	60.486
GOTERM_BP_FAT	GO:0007605~sensory perception of sound	5	0.0628815	SPRY2, CDKN1B, CHRNB2, MYC, GJB2	1	0.57701	66.7162	GOTERM_BP_FAT	GO:0001944~vasculature development	8	0.00288083	TCF21, TBX3, EPAS1, CDX4, PROX1, NKX2-5, COL5A1, WT1	0.948627	0.0343224	4.47173	GOTERM_BP_FAT	GO:0032268~regulation of cellular protein metabolic process	14	0.0553935	SMAD7, BTRC, BARHL2, TAF7, PRKAG2, PRKCE, RPS5, AGTR1, PPP2CA, JUN, PSMA3, JAK2, IFT88, INSR	1	0.640875	62.0844
GOTERM_BP_FAT	GO:0050877~neurological system process	17	0.121358	POU6F2, RP2, CTNND2, PAX6, ITGA2, GABBR2, NR4A3, GJB2, SPRY2, CDKN1B, RASGRF1, NR2F6, CHRNB2, TLX3, CLN8, MYC, APBA1	1	0.730215	88.8251	GOTERM_BP_FAT	GO:0030324~lung development	3	0.171417	TCF21, EPAS1, PROX1	1	0.717662	94.9297	GOTERM_BP_FAT	GO:0031400~negative regulation of protein modification process	6	0.0629525	SMAD7, JUN, PPP2CA, TAF7, PSMA3, INSR	1	0.671714	66.9299
GOTERM_BP_FAT	GO:0050953~sensory perception of light stimulus	5	0.297814	RP2, POU6F2, PAX6, CHRNB2, CLN8	1	0.913101	99.7493	GOTERM_BP_FAT	GO:0030323~respiratory tube development	3	0.179496	TCF21, EPAS1, PROX1	1	0.733375	95.6594	GOTERM_BP_FAT	GO:0042325~regulation of phosphorylation	13	0.0722303	LIMK2, BLM, SMAD7, TAF7, PRKAG2, MALT1, VAV2, PRKCE, CDKN1B, PPP2CA, JUN, JAK2, INSR	1	0.700448	72.0815
GOTERM_BP_FAT	GO:0007601~visual perception	5	0.297814	RP2, POU6F2, PAX6, CHRNB2, CLN8	1	0.913101	99.7493	GOTERM_BP_FAT	GO:0060541~respiratory system development	3	0.195822	TCF21, EPAS1, PROX1	1	0.760302	96.844	GOTERM_BP_FAT	GO:0044092~negative regulation of molecular function	11	0.0739709	CDKN1B, RSF1, ID2, SMAD7, PPP2CA, TAF7, PSMA3, PRKAG2, JAK2, NPR3, INSR	1	0.703099	72.9596
																GOTERM_BP_FAT	GO:0019220~regulation of phosphate metabolic process	13	0.085649	LIMK2, BLM, SMAD7, TAF7, PRKAG2, MALT1, VAV2, PRKCE, CDKN1B, PPP2CA, JUN, JAK2, INSR	1	0.736677	78.2121
Annotation Cluster 27	Enrichment Score: 1.0444386248771087							Annotation Cluster 29	Enrichment Score: 1.1675275200620443							GOTERM_BP_FAT	GO:0051174~regulation of phosphorus metabolic process	13	0.085649	LIMK2, BLM, SMAD7, TAF7, PRKAG2, MALT1, VAV2, PRKCE, CDKN1B, PPP2CA, JUN, JAK2, INSR	1	0.736677	78.2121
Category	Term	Count	PValue	Genes	Bonferroni	Benjamini	FDR	Category	Term	Count	PValue	Genes	Bonferroni	Benjamini	FDR	GOTERM_MF_FAT	GO:0010843~promoter binding	4	0.0890277	SMAD7, JUN, TAF7, NR2F2	1	0.890943	72.8132
GOTERM_BP_FAT	GO:0031575~G1/S transition checkpoint	3	0.0377038	CCND1, CDKN2B, RPL24	1	0.462741	47.848	GOTERM_MF_FAT	GO:0046983~protein dimerization activity	12	0.00197844	TCF21, HELT, EPAS1, GRIK2, NR4A2, TFAP2A, PLVAP, OLIG2, ALX4, NKX2-5, ATF1, SIM1	0.237623	0.0380177	2.30091	GOTERM_BP_FAT	GO:0006275~regulation of DNA replication	4	0.100816	BLM, JUN, PPP2CA, INSR	1	0.784279	83.6096
GOTERM_BP_FAT	GO:0007346~regulation of mitotic cell cycle	7	0.0419744	CCND1, HOXA13, CDKN2B, BCL2, FOXC1, RPL24, MYC	1	0.484579	51.6328	GOTERM_MF_FAT	GO:0042803~protein homodimerization activity	5	0.228504	HELT, GRIK2, PLVAP, OLIG2, NKX2-5	1	0.891534	95.2608	GOTERM_MF_FAT	GO:0019900~kinase binding	6	0.185785	PTPRK, CTTNBP2, PRKAG2, JAK2, MAP2K7, INSR	1	0.958977	94.3352
GOTERM_BP_FAT	GO:0007093~mitotic cell cycle checkpoint	3	0.185074	CCND1, CDKN2B, RPL24	1	0.813111	96.8779	GOTERM_MF_FAT	GO:0042802~identical protein binding	5	0.695346	HELT, GRIK2, PLVAP, OLIG2, NKX2-5	1	0.998094	99.9999	GOTERM_BP_FAT	GO:0031401~positive regulation of protein modification process	6	0.188378	SMAD7, BTRC, PSMA3, PRKAG2, JAK2, INSR	1	0.90298	97.1334
GOTERM_BP_FAT	GO:0000075~cell cycle checkpoint	4	0.226742	CCNE2, CCND1, CDKN2B, RPL24	1	0.856951	98.7166									GOTERM_BP_FAT	GO:0006469~negative regulation of protein kinase activity	4	0.19683	CDKN1B, PPP2CA, TAF7, PRKAG2	1	0.907204	97.6012
								Annotation Cluster 30	Enrichment Score: 1.1343057245036885							GOTERM_BP_FAT	GO:0033673~negative regulation of kinase activity	4	0.212023	CDKN1B, PPP2CA, TAF7, PRKAG2	1	0.917576	98.2668
Annotation Cluster 28	Enrichment Score: 1.0250977674140431							Category	Term	Count	PValue	Genes	Bonferroni	Benjamini	FDR	GOTERM_BP_FAT	GO:0032269~negative regulation of cellular protein metabolic process	6	0.215981	SMAD7, JUN, PPP2CA, TAF7, PSMA3, INSR	1	0.919527	98.4091
Category	Term	Count	PValue	Genes	Bonferroni	Benjamini	FDR	GOTERM_BP_FAT	GO:0007517~muscle organ development	7	0.00521968	FOXL2, MSX1, GSC, PAX7, ALX4, PROX1, NKX2-5	0.995416	0.0580797	7.96366	GOTERM_BP_FAT	GO:0007243~protein kinase cascade	9	0.233448	WNT5A, PPP2CA, PRKAG2, MALT1, JAK2, MAP2K7, INSR, NKIRAS2, IRAK1BP1	1	0.930253	98.9158
GOTERM_MF_FAT	GO:0019899~enzyme binding	15	0.0758088	IRS2, ZC3HC1, RBBP4, U2AF2, DOCK9, TRIM24, PPP1CC, GCLM, MLL5, CCND1, CDKN2B, BCL2, RAP1A, FAS, MAP3K11	1	0.889395	66.5785	GOTERM_BP_FAT	GO:0043066~negative regulation of apoptosis	7	0.0511898	BDNF, MSX1, TBX3, GRIK2, PAX7, NR4A2, NKX2-5	1	0.348925	56.5363	GOTERM_BP_FAT	GO:0010647~positive regulation of cell communication	8	0.233937	LAMA2, CDH13, MIER1, MALT1, JAK2, F7, GHSR, INSR	1	0.928669	98.9275
GOTERM_MF_FAT	GO:0019900~kinase binding	7	0.0944845	IRS2, CCND1, ZC3HC1, CDKN2B, FAS, PPP1CC, MAP3K11	1	0.897999	74.8364	GOTERM_BP_FAT	GO:0043069~negative regulation of programmed cell death	7	0.0541003	BDNF, MSX1, TBX3, GRIK2, PAX7, NR4A2, NKX2-5	1	0.360535	58.603	GOTERM_BP_FAT	GO:0010740~positive regulation of protein kinase cascade	5	0.23421	MIER1, MALT1, JAK2, F7, INSR	1	0.926881	98.934
GOTERM_MF_FAT	GO:0019901~protein kinase binding	6	0.117389	IRS2, CCND1, ZC3HC1, CDKN2B, PPP1CC, MAP3K11	1	0.923442	82.3764	GOTERM_BP_FAT	GO:0060548~negative regulation of cell death	7	0.0546944	BDNF, MSX1, TBX3, GRIK2, PAX7, NR4A2, NKX2-5	1	0.359314	59.0133	GOTERM_BP_FAT	GO:0043085~positive regulation of catalytic activity	12	0.236721	AGTR1, BTRC, PSMA3, PRKAG2, NR4A2, MALT1, GNAS, JAK2, NPR3, VAV2, INSR, TPM1	1	0.925161	98.9919
								GOTERM_BP_FAT	GO:0043524~negative regulation of neuron apoptosis	3	0.0565337	BDNF, GRIK2, NR4A2	1	0.366893	60.2598	GOTERM_BP_FAT	GO:0051248~negative regulation of protein metabolic process	6	0.237466	SMAD7, JUN, PPP2CA, TAF7, PSMA3, INSR	1	0.924848	99.0086
Annotation Cluster 29	Enrichment Score: 1.0173175401465027							GOTERM_BP_FAT	GO:0042981~regulation of apoptosis	11	0.0810925	FOXL2, BDNF, MSX1, TBX3, GRIK2, PAX7, NR4A2, SOX9, PRKCE, ALX4, NKX2-5	1	0.47017	73.8428	GOTERM_BP_FAT	GO:0051348~negative regulation of transferase activity	4	0.243108	CDKN1B, PPP2CA, TAF7, PRKAG2	1	0.927068	99.1263
Category	Term	Count	PValue	Genes	Bonferroni	Benjamini	FDR	GOTERM_BP_FAT	GO:0043067~regulation of programmed cell death	11	0.0853024	FOXL2, BDNF, MSX1, TBX3, GRIK2, PAX7, NR4A2, SOX9, PRKCE, ALX4, NKX2-5	1	0.483176	75.6798	GOTERM_BP_FAT	GO:0043549~regulation of kinase activity	9	0.247569	CDKN1B, BLM, PPP2CA, TAF7, PRKAG2, MALT1, JAK2, VAV2, INSR	1	0.929111	99.2099
GOTERM_BP_FAT	GO:0048729~tissue morphogenesis	8	0.0250085	NOTCH1, SHROOM3, TBX5, BCL2, FOXC1, NR4A3, GLI3, HOXD11	1	0.381119	34.884	GOTERM_BP_FAT	GO:0010941~regulation of cell death	11	0.0869153	FOXL2, BDNF, MSX1, TBX3, GRIK2, PAX7, NR4A2, SOX9, PRKCE, ALX4, NKX2-5	1	0.487426	76.351	GOTERM_BP_FAT	GO:0031329~regulation of cellular catabolic process	3	0.264139	SMAD7, PRKAG2, INSR	1	0.93901	99.4591
GOTERM_BP_FAT	GO:0016202~regulation of striated muscle tissue development	3	0.185074	NOTCH1, TBX5, BCL2	1	0.813111	96.8779	GOTERM_BP_FAT	GO:0043523~regulation of neuron apoptosis	3	0.147596	BDNF, GRIK2, NR4A2	1	0.670543	92.0526	GOTERM_BP_FAT	GO:0009967~positive regulation of signal transduction	7	0.276466	CDH13, MIER1, MALT1, JAK2, F7, GHSR, INSR	1	0.943836	99.5943
GOTERM_BP_FAT	GO:0048634~regulation of muscle development	3	0.191697	NOTCH1, TBX5, BCL2	1	0.820955	97.2809	GOTERM_BP_FAT	GO:0006916~anti-apoptosis	4	0.203292	BDNF, TBX3, PAX7, NKX2-5	1	0.768137	97.2781	GOTERM_BP_FAT	GO:0051338~regulation of transferase activity	9	0.288358	CDKN1B, BLM, PPP2CA, TAF7, PRKAG2, MALT1, JAK2, VAV2, INSR	1	0.94573	99.694
								GOTERM_BP_FAT	GO:0044057~regulation of system process	4	0.413169	BDNF, EPAS1, GRIK2, NKX2-5	1	0.953305	99.9787	GOTERM_BP_FAT	GO:0007242~intracellular signaling cascade	24	0.322985	WNT5A, BLM, SMAD7, PRKAG2, TAF7, MALT1, NPR3, VAV2, PRKCE, MCF2L, AGTR1, CDH13, PPP2CA, YWHAQ, RAB14, GNAS, JAK2, RAB12, CARM1, GHSR, MAP2K7, INSR, NKIRAS2, IRAK1BP1	1	0.95594	99.8691
Annotation Cluster 30	Enrichment Score: 1.0112398895443573															GOTERM_BP_FAT	GO:0051052~regulation of DNA metabolic process	4	0.323181	BLM, JUN, PPP2CA, INSR	1	0.955441	99.8697
Category	Term	Count	PValue	Genes	Bonferroni	Benjamini	FDR	Annotation Cluster 31	Enrichment Score: 1.1239693867852774							GOTERM_BP_FAT	GO:0010627~regulation of protein kinase cascade	6	0.331867	MIER1, PPP2CA, MALT1, JAK2, F7, INSR	1	0.958101	99.8954
GOTERM_BP_FAT	GO:0045321~leukocyte activation	9	0.0139634	ICAM1, MLL5, TOLLIP, BCL2, BCL11A, SOX4, CHRNB2, FAS, CBFB	1	0.281334	21.1947	Category	Term	Count	PValue	Genes	Bonferroni	Benjamini	FDR	GOTERM_BP_FAT	GO:0001934~positive regulation of protein amino acid phosphorylation	3	0.336755	PRKAG2, JAK2, INSR	1	0.958795	99.9077
GOTERM_BP_FAT	GO:0001775~cell activation	9	0.0295799	ICAM1, MLL5, TOLLIP, BCL2, BCL11A, SOX4, CHRNB2, FAS, CBFB	1	0.407748	39.8668	GOTERM_BP_FAT	GO:0007267~cell-cell signaling	11	0.0149603	DHH, BDNF, HOXC11, HRH3, CXCL14, TBX3, GRIK2, LHX1, GATA4, FZD1, WNT7A	1	0.137326	21.2602	GOTERM_BP_FAT	GO:0045859~regulation of protein kinase activity	8	0.3555	CDKN1B, BLM, PPP2CA, TAF7, PRKAG2, MALT1, JAK2, INSR	1	0.965578	99.9433
GOTERM_BP_FAT	GO:0002521~leukocyte differentiation	6	0.0335104	CEBPA, BCL2, BCL11A, SOX4, FAS, CBFB	1	0.438686	43.8619	GOTERM_BP_FAT	GO:0003001~generation of a signal involved in cell-cell signaling	4	0.0263316	BDNF, HRH3, TBX3, WNT7A	1	0.210779	34.5015	GOTERM_BP_FAT	GO:0043086~negative regulation of catalytic activity	7	0.363652	CDKN1B, SMAD7, PPP2CA, TAF7, PSMA3, PRKAG2, NPR3	1	0.966946	99.9544
GOTERM_BP_FAT	GO:0002252~immune effector process	5	0.0521158	ICAM1, MLL5, BCL2, TUBB2C, FAS	1	0.529736	59.6111	GOTERM_BP_FAT	GO:0032940~secretion by cell	4	0.205233	BDNF, HRH3, TBX3, WNT7A	1	0.769643	97.3814	GOTERM_BP_FAT	GO:0044093~positive regulation of molecular function	12	0.366024	AGTR1, BTRC, PSMA3, PRKAG2, NR4A2, MALT1, GNAS, JAK2, NPR3, VAV2, INSR, TPM1	1	0.966949	99.9572
GOTERM_BP_FAT	GO:0046649~lymphocyte activation	7	0.0539834	ICAM1, BCL2, BCL11A, SOX4, CHRNB2, FAS, CBFB	1	0.53978	60.938	GOTERM_BP_FAT	GO:0046903~secretion	4	0.394874	BDNF, HRH3, TBX3, WNT7A	1	0.946968	99.9653	GOTERM_BP_FAT	GO:0042327~positive regulation of phosphorylation	3	0.372342	PRKAG2, JAK2, INSR	1	0.968458	99.9639
GOTERM_BP_FAT	GO:0030098~lymphocyte differentiation	5	0.0541815	BCL2, BCL11A, SOX4, FAS, CBFB	1	0.538303	61.0764									GOTERM_BP_FAT	GO:0010562~positive regulation of phosphorus metabolic process	3	0.393331	PRKAG2, JAK2, INSR	1	0.974002	99.9798
GOTERM_BP_FAT	GO:0030217~T cell differentiation	4	0.0570009	BCL2, BCL11A, SOX4, FAS	1	0.551408	62.9957	Annotation Cluster 32	Enrichment Score: 0.8893450248501414							GOTERM_BP_FAT	GO:0045937~positive regulation of phosphate metabolic process	3	0.393331	PRKAG2, JAK2, INSR	1	0.974002	99.9798
BIOCARTA	h_keratinocytePathway:Keratinocyte Differentiation	4	0.0640473	CEBPA, MAP3K5, BCL2, FAS	0.995888	0.995888	50.7771	Category	Term	Count	PValue	Genes	Bonferroni	Benjamini	FDR	GOTERM_BP_FAT	GO:0009894~regulation of catabolic process	3	0.467312	SMAD7, PRKAG2, INSR	1	0.984043	99.9978
GOTERM_BP_FAT	GO:0002443~leukocyte mediated immunity	4	0.0756151	ICAM1, MLL5, TUBB2C, FAS	1	0.610328	73.6009	GOTERM_BP_FAT	GO:0051094~positive regulation of developmental process	7	0.0186146	BDNF, HOXD3, GATA4, PROX1, NKX2-5, WNT7A, NKX2-2	1	0.158554	25.7668	GOTERM_BP_FAT	GO:0033674~positive regulation of kinase activity	5	0.513677	PRKAG2, MALT1, JAK2, VAV2, INSR	1	0.988829	99.9995
GOTERM_BP_FAT	GO:0042110~T cell activation	5	0.101501	ICAM1, BCL2, BCL11A, SOX4, FAS	1	0.681124	83.683	GOTERM_BP_FAT	GO:0044087~regulation of cellular component biogenesis	3	0.290434	PROX1, NKX2-5, WNT7A	1	0.876197	99.5663	GOTERM_BP_FAT	GO:0051347~positive regulation of transferase activity	5	0.546249	PRKAG2, MALT1, JAK2, VAV2, INSR	1	0.991999	99.9999
GOTERM_BP_FAT	GO:0030097~hemopoiesis	7	0.136566	CEBPA, MLL5, BCL2, BCL11A, SOX4, FAS, CBFB	1	0.747466	91.6861	GOTERM_BP_FAT	GO:0051130~positive regulation of cellular component organization	3	0.39725	PROX1, NKX2-5, WNT7A	1	0.9473	99.9674	GOTERM_BP_FAT	GO:0032147~activation of protein kinase activity	3	0.576018	MALT1, JAK2, INSR	1	0.993842	100
GOTERM_BP_FAT	GO:0002449~lymphocyte mediated immunity	3	0.165425	ICAM1, TUBB2C, FAS	1	0.790263	95.3257									GOTERM_BP_FAT	GO:0045860~positive regulation of protein kinase activity	4	0.696782	PRKAG2, MALT1, JAK2, INSR	1	0.998236	100
GOTERM_BP_FAT	GO:0048534~hemopoietic or lymphoid organ development	7	0.189246	CEBPA, MLL5, BCL2, BCL11A, SOX4, FAS, CBFB	1	0.817948	97.1379	Annotation Cluster 33	Enrichment Score: 0.8607884652530621
GOTERM_BP_FAT	GO:0002520~immune system development	7	0.234382	CEBPA, MLL5, BCL2, BCL11A, SOX4, FAS, CBFB	1	0.862698	98.9153	Category	Term	Count	PValue	Genes	Bonferroni	Benjamini	FDR	Annotation Cluster 35	Enrichment Score: 0.7981063084348585
GOTERM_BP_FAT	GO:0030099~myeloid cell differentiation	3	0.412172	CEBPA, MLL5, CBFB	1	0.963414	99.9877	SP_PIR_KEYWORDS	zinc	23	0.0080766	LMX1B, NR4A2, ZNF790, ZNF501, LMX1A, PRDM16, PRKCE, LIN28B, WT1, ZIC2, FEZF1, COL9A1, FEZF2, PRDM15, ISL2, LHX1, EBF2, LHX2, EBF1, GATA4, NR5A2, ADAMTS5, ZNF423	0.748068	0.0825547	9.41968	Category	Term	Count	PValue	Genes	Bonferroni	Benjamini	FDR
GOTERM_BP_FAT	GO:0048872~homeostasis of number of cells	3	0.449771	MLL5, BCL2, FAS	1	0.971111	99.996	UP_SEQ_FEATURE	zinc finger region:C2H2-type 4	9	0.0208258	FEZF1, FEZF2, PRDM15, ZNF501, ZNF790, PRDM16, WT1, ZIC2, ZNF423	0.999872	0.409852	25.6389	GOTERM_BP_FAT	GO:0044057~regulation of system process	10	0.0624127	LAMA2, AGTR1, TF, EGR2, SMAD7, GRIN1, CRH, JAK2, GHSR, TPM1	1	0.675358	66.6042
GOTERM_BP_FAT	GO:0006955~immune response	7	0.586471	ICAM1, NOTCH1, MLL5, TOLLIP, BCL2, TUBB2C, FAS	1	0.989427	100	UP_SEQ_FEATURE	zinc finger region:C2H2-type 3	9	0.0312877	FEZF1, FEZF2, PRDM15, ZNF501, ZNF790, PRDM16, WT1, ZIC2, ZNF423	0.999999	0.509687	36.0736	GOTERM_BP_FAT	GO:0051240~positive regulation of multicellular organismal process	8	0.0733607	LAMA2, TF, CRH, MALT1, POU3F2, JAK2, GHSR, TPM1	1	0.703117	72.6547
								UP_SEQ_FEATURE	zinc finger region:C2H2-type 5	8	0.0405814	FEZF1, FEZF2, PRDM15, ZNF501, ZNF790, PRDM16, ZIC2, ZNF423	1	0.586216	44.1852	GOTERM_BP_FAT	GO:0009611~response to wounding	5	0.880937	TF, CRH, JAK2, F7, TPM1	1	0.999957	100
Annotation Cluster 31	Enrichment Score: 1.0079339294944683							INTERPRO	IPR013087:Zinc finger, C2H2-type/integrase, DNA-binding	9	0.0487118	FEZF1, FEZF2, PRDM15, ZNF501, ZNF790, PRDM16, WT1, ZIC2, ZNF423	0.999931	0.47229	46.2989
Category	Term	Count	PValue	Genes	Bonferroni	Benjamini	FDR	SP_PIR_KEYWORDS	metal-binding	25	0.0617478	PRDM16, LIN28B, WT1, ZIC2, COL9A1, PRDM15, LHX1, LHX2, GATA4, TPO, ZNF423, LMX1B, NR4A2, ZNF790, ZNF501, LMX1A, PRKCE, FEZF1, RPS6KA6, FEZF2, ISL2, EBF2, EBF1, NR5A2, ADAMTS5	0.99998	0.375682	54.0481	Annotation Cluster 36	Enrichment Score: 0.7578701752100973
KEGG_PATHWAY	hsa05222:Small cell lung cancer	10	1.76027e-05	CCNE2, CCND1, CDKN1B, CDKN2B, BCL2, ITGA2, MYC, AKT3, ITGA2B, FN1	0.00189931	0.00189931	0.0198189	UP_SEQ_FEATURE	zinc finger region:C2H2-type 2	8	0.0690463	FEZF1, FEZF2, PRDM15, ZNF501, ZNF790, PRDM16, WT1, ZNF423	1	0.765748	63.4711	Category	Term	Count	PValue	Genes	Bonferroni	Benjamini	FDR
GOTERM_MF_FAT	GO:0016538~cyclin-dependent protein kinase regulator activity	4	0.00343776	CCNE2, CCND1, CDKN1B, CDKN2B	0.739845	0.201015	4.67457	UP_SEQ_FEATURE	zinc finger region:C2H2-type 6	7	0.0696568	FEZF1, FEZF2, PRDM15, ZNF501, ZNF790, PRDM16, ZNF423	1	0.752931	63.8068	INTERPRO	IPR014778:Myb, DNA-binding	3	0.106609	MIER1, MIER3, CDC5L	1	0.995051	80.4353
KEGG_PATHWAY	hsa05200:Pathways in cancer	14	0.00518561	CEBPA, FGF14, ITGA2, GLI3, CCNE2, CCND1, CDKN1B, CDKN2B, BCL2, FAS, MYC, AKT3, FN1, ITGA2B	0.429649	0.170695	5.68612	SP_PIR_KEYWORDS	zinc-finger	16	0.0779478	ZNF790, ZNF501, NR4A2, PRDM16, PRKCE, LIN28B, WT1, ZIC2, FEZF1, FEZF2, PRDM15, EBF2, GATA4, EBF1, NR5A2, ZNF423	0.999999	0.437203	62.8445	INTERPRO	IPR001005:SANT, DNA-binding	3	0.193732	MIER1, MIER3, CDC5L	1	0.999812	95.5683
KEGG_PATHWAY	hsa04110:Cell cycle	7	0.0314391	CCNE2, CCND1, CDKN1B, CDKN2B, MYC, CDC25B, MCM6	0.968253	0.498419	30.2107	GOTERM_MF_FAT	GO:0008270~zinc ion binding	23	0.11054	LMX1B, NR4A2, ZNF790, ZNF501, LMX1A, PRDM16, PRKCE, LIN28B, WT1, ZIC2, FEZF1, COL9A1, FEZF2, PRDM15, ISL2, LHX1, EBF2, LHX2, EBF1, GATA4, NR5A2, ADAMTS5, ZNF423	1	0.656952	74.7638	SMART	SM00717:SANT	3	0.257865	MIER1, MIER3, CDC5L	1	0.991533	96.8676
GOTERM_BP_FAT	GO:0051329~interphase of mitotic cell cycle	6	0.0335104	CCND1, CDKN1B, CDKN2B, BCL2, MAP3K11, NFATC1	1	0.438686	43.8619	INTERPRO	IPR007087:Zinc finger, C2H2-type	9	0.136422	FEZF1, FEZF2, PRDM15, ZNF501, ZNF790, PRDM16, WT1, ZIC2, ZNF423	1	0.809199	83.8957
GOTERM_BP_FAT	GO:0051325~interphase	6	0.0374391	CCND1, CDKN1B, CDKN2B, BCL2, MAP3K11, NFATC1	1	0.46342	47.6045	INTERPRO	IPR015880:Zinc finger, C2H2-like	9	0.145643	FEZF1, FEZF2, PRDM15, ZNF501, ZNF790, PRDM16, WT1, ZIC2, ZNF423	1	0.813438	85.9102	Annotation Cluster 37	Enrichment Score: 0.7498886335160626
SP_PIR_KEYWORDS	cyclin	4	0.0468488	CCNE2, CCND1, CDKN1B, CDKN2B	0.999998	0.537232	46.8447	UP_SEQ_FEATURE	zinc finger region:C2H2-type 8	5	0.233429	PRDM15, ZNF501, ZNF790, PRDM16, ZNF423	1	0.987164	97.6288	Category	Term	Count	PValue	Genes	Bonferroni	Benjamini	FDR
GOTERM_MF_FAT	GO:0019887~protein kinase regulator activity	5	0.0570214	CCNE2, ELP3, CCND1, CDKN1B, CDKN2B	1	0.828961	55.7892	GOTERM_MF_FAT	GO:0043169~cation binding	35	0.257478	DCHS2, GLB1L, PCDHGC3, PCDHGA4, PRDM16, LIN28B, PCDHGA3, WT1, ZIC2, COL9A1, PRDM15, LHX1, LHX2, GATA4, TPO, ZNF423, PCDHGA12, PCDHGA10, PCDHGA11, LMX1B, ZNF501, NR4A2, ZNF790, LMX1A, PRKCE, PCDHGB5, PCDHGB4, FEZF1, FEZF2, RPS6KA6, ISL2, EBF2, EBF1, CACNA1F, NR5A2, ADAMTS5	1	0.896258	96.978	GOTERM_BP_FAT	GO:0050890~cognition	12	0.130707	CDKN1B, LRAT, EGR2, TRPM8, JUN, GRIN1, CRH, GNAS, IMPDH1, SIX6, GJA3, KCNIP3	1	0.836044	90.7802
GOTERM_BP_FAT	GO:0051338~regulation of transferase activity	11	0.0687174	CCNE2, SPRY2, CCND1, MAP3K5, CDKN1B, CDKN2B, ADRA2A, CLN8, CDC25B, MAP3K11, DUSP6	1	0.591804	70.0582	GOTERM_MF_FAT	GO:0043167~ion binding	35	0.29105	DCHS2, GLB1L, PCDHGC3, PCDHGA4, PRDM16, LIN28B, PCDHGA3, WT1, ZIC2, COL9A1, PRDM15, LHX1, LHX2, GATA4, TPO, ZNF423, PCDHGA12, PCDHGA10, PCDHGA11, LMX1B, ZNF501, NR4A2, ZNF790, LMX1A, PRKCE, PCDHGB5, PCDHGB4, FEZF1, FEZF2, RPS6KA6, ISL2, EBF2, EBF1, CACNA1F, NR5A2, ADAMTS5	1	0.90522	98.2457	GOTERM_BP_FAT	GO:0050877~neurological system process	17	0.184435	EGR2, KCND2, TRPM8, GRIN1, SIX6, GJA3, KCNIP3, CTTNBP2, LRAT, CDKN1B, JUN, RAB14, CRH, GNAS, POU3F2, GHSR, IMPDH1	1	0.904662	96.8869
GOTERM_BP_FAT	GO:0000079~regulation of cyclin-dependent protein kinase activity	4	0.0691415	CCNE2, CCND1, CDKN1B, CDKN2B	1	0.591534	70.2883	GOTERM_MF_FAT	GO:0046914~transition metal ion binding	24	0.291577	LMX1B, NR4A2, ZNF790, ZNF501, LMX1A, PRDM16, PRKCE, LIN28B, WT1, ZIC2, FEZF1, COL9A1, FEZF2, PRDM15, ISL2, LHX1, EBF2, LHX2, EBF1, GATA4, TPO, NR5A2, ADAMTS5, ZNF423	1	0.89448	98.2609	GOTERM_BP_FAT	GO:0007600~sensory perception	9	0.233448	CDKN1B, LRAT, TRPM8, GRIN1, GNAS, IMPDH1, SIX6, GJA3, KCNIP3	1	0.930253	98.9158
GOTERM_BP_FAT	GO:0000082~G1/S transition of mitotic cell cycle	4	0.0723455	CCND1, CDKN1B, BCL2, NFATC1	1	0.601035	71.9739	GOTERM_MF_FAT	GO:0046872~metal ion binding	34	0.309496	DCHS2, PCDHGC3, PCDHGA4, PRDM16, LIN28B, PCDHGA3, WT1, ZIC2, COL9A1, PRDM15, LHX1, LHX2, GATA4, TPO, ZNF423, PCDHGA12, PCDHGA10, PCDHGA11, LMX1B, ZNF501, NR4A2, ZNF790, LMX1A, PRKCE, PCDHGB5, PCDHGB4, FEZF1, FEZF2, RPS6KA6, ISL2, EBF2, EBF1, CACNA1F, NR5A2, ADAMTS5	1	0.900357	98.7131
KEGG_PATHWAY	hsa05215:Prostate cancer	5	0.07801	CCNE2, CCND1, CDKN1B, BCL2, AKT3	0.999845	0.665956	59.9302	UP_SEQ_FEATURE	zinc finger region:C2H2-type 10	4	0.316366	PRDM15, ZNF790, PRDM16, ZNF423	1	0.996254	99.5268	Annotation Cluster 38	Enrichment Score: 0.7339330884004975
GOTERM_MF_FAT	GO:0019207~kinase regulator activity	5	0.079767	CCNE2, ELP3, CCND1, CDKN1B, CDKN2B	1	0.885466	68.5144	UP_SEQ_FEATURE	zinc finger region:C2H2-type 9	4	0.384194	PRDM15, ZNF501, ZNF790, PRDM16	1	0.998976	99.8913	Category	Term	Count	PValue	Genes	Bonferroni	Benjamini	FDR
GOTERM_BP_FAT	GO:0045859~regulation of protein kinase activity	10	0.0901414	CCNE2, SPRY2, CCND1, MAP3K5, CDKN1B, CDKN2B, ADRA2A, CDC25B, MAP3K11, DUSP6	1	0.651277	79.8132	UP_SEQ_FEATURE	zinc finger region:C2H2-type 1	5	0.399225	FEZF1, FEZF2, PRDM15, ZNF501, WT1	1	0.99909	99.9232	GOTERM_BP_FAT	GO:0001568~blood vessel development	8	0.106444	SEMA5A, CDH13, CDX2, HOXA3, SMAD7, JUN, FOXF1, NR2F2	1	0.795441	85.2706
GOTERM_BP_FAT	GO:0051174~regulation of phosphorus metabolic process	12	0.10552	CCNE2, SPRY2, CCND1, MAP3K5, CDKN1B, CDKN2B, BCL2, ADRA2A, ITGA2, CDC25B, MAP3K11, DUSP6	1	0.691664	84.8762	UP_SEQ_FEATURE	zinc finger region:C2H2-type 12	3	0.44035	PRDM15, ZNF790, ZNF423	1	0.999443	99.9717	GOTERM_BP_FAT	GO:0001944~vasculature development	8	0.119971	SEMA5A, CDH13, CDX2, HOXA3, SMAD7, JUN, FOXF1, NR2F2	1	0.823643	88.6383
GOTERM_BP_FAT	GO:0019220~regulation of phosphate metabolic process	12	0.10552	CCNE2, SPRY2, CCND1, MAP3K5, CDKN1B, CDKN2B, BCL2, ADRA2A, ITGA2, CDC25B, MAP3K11, DUSP6	1	0.691664	84.8762	SMART	SM00355:ZnF_C2H2	9	0.473105	FEZF1, FEZF2, PRDM15, ZNF501, ZNF790, PRDM16, WT1, ZIC2, ZNF423	1	0.986768	99.8121	GOTERM_BP_FAT	GO:0048514~blood vessel morphogenesis	7	0.131553	SEMA5A, CDH13, HOXA3, SMAD7, JUN, FOXF1, NR2F2	1	0.836017	90.9318
GOTERM_BP_FAT	GO:0043549~regulation of kinase activity	10	0.106237	CCNE2, SPRY2, CCND1, MAP3K5, CDKN1B, CDKN2B, ADRA2A, CDC25B, MAP3K11, DUSP6	1	0.692098	85.0802	UP_SEQ_FEATURE	zinc finger region:C2H2-type 7	4	0.500553	PRDM15, ZNF501, ZNF790, ZNF423	1	0.999786	99.9943	GOTERM_BP_FAT	GO:0001525~angiogenesis	3	0.690191	SEMA5A, CDH13, JUN	1	0.998162	100
GOTERM_BP_FAT	GO:0051726~regulation of cell cycle	10	0.114717	CCNE2, CCND1, CDKN1B, SFRS5, HOXA13, CDKN2B, BCL2, FOXC1, RPL24, MYC	1	0.715075	87.3049	UP_SEQ_FEATURE	zinc finger region:C2H2-type 11	3	0.519102	PRDM15, ZNF790, ZNF423	1	0.999827	99.9967
BIOCARTA	h_cellcyclePathway:Cyclins and Cell Cycle Regulation	3	0.137042	CCND1, CDKN1B, CDKN2B	0.999995	0.997794	79.3684									Annotation Cluster 39	Enrichment Score: 0.7178668730592384
GOTERM_BP_FAT	GO:0000165~MAPKKK cascade	6	0.137126	DUSP4, MAP3K5, ADRA2A, ROR2, MAP3K11, DUSP6	1	0.745318	91.777	Annotation Cluster 34	Enrichment Score: 0.6599587737904921							Category	Term	Count	PValue	Genes	Bonferroni	Benjamini	FDR
GOTERM_BP_FAT	GO:0043405~regulation of MAP kinase activity	5	0.138587	SPRY2, MAP3K5, ADRA2A, MAP3K11, DUSP6	1	0.747468	92.0098	Category	Term	Count	PValue	Genes	Bonferroni	Benjamini	FDR	GOTERM_BP_FAT	GO:0051271~negative regulation of cell motion	4	0.0929284	PTPRK, CDKN1B, SMAD7, TPM1	1	0.758016	80.9831
GOTERM_BP_FAT	GO:0042325~regulation of phosphorylation	11	0.159621	CCNE2, SPRY2, CCND1, MAP3K5, CDKN1B, CDKN2B, BCL2, ADRA2A, CDC25B, MAP3K11, DUSP6	1	0.780612	94.7435	GOTERM_MF_FAT	GO:0008134~transcription factor binding	8	0.0817403	EPAS1, GATA4, TFAP2A, MXD1, PRDM16, PROX1, NKX2-5, PITX2	0.999992	0.565899	63.2979	GOTERM_BP_FAT	GO:0030336~negative regulation of cell migration	3	0.264139	PTPRK, SMAD7, TPM1	1	0.93901	99.4591
BIOCARTA	h_g1Pathway:Cell Cycle: G1/S Check Point	3	0.177429	CCND1, CDKN1B, CDKN2B	1	0.960927	87.6512	GOTERM_MF_FAT	GO:0003712~transcription cofactor activity	5	0.274871	EPAS1, TFAP2A, MXD1, PRDM16, PROX1	1	0.90148	97.7128	GOTERM_BP_FAT	GO:0040013~negative regulation of locomotion	3	0.286034	PTPRK, SMAD7, TPM1	1	0.944944	99.6765
GOTERM_BP_FAT	GO:0044093~positive regulation of molecular function	13	0.185516	ICAM1, EPB41, ITGA2, GDNF, GCLM, CDC25B, CCND1, MAP3K5, RASGRF1, BCL2, ADRA2A, MYC, MAP3K11	1	0.812487	96.9065	GOTERM_MF_FAT	GO:0003713~transcription coactivator activity	3	0.466186	EPAS1, TFAP2A, PRDM16	1	0.976221	99.9375
GOTERM_BP_FAT	GO:0000075~cell cycle checkpoint	4	0.226742	CCNE2, CCND1, CDKN2B, RPL24	1	0.856951	98.7166									Annotation Cluster 40	Enrichment Score: 0.708420635537157
GOTERM_BP_FAT	GO:0043085~positive regulation of catalytic activity	11	0.274849	CCND1, MAP3K5, RASGRF1, BCL2, ADRA2A, ITGA2, GDNF, GCLM, MYC, CDC25B, MAP3K11	1	0.897116	99.5677	Annotation Cluster 35	Enrichment Score: 0.588759976632931							Category	Term	Count	PValue	Genes	Bonferroni	Benjamini	FDR
GOTERM_BP_FAT	GO:0000187~activation of MAPK activity	3	0.30664	MAP3K5, ADRA2A, MAP3K11	1	0.91879	99.7977	Category	Term	Count	PValue	Genes	Bonferroni	Benjamini	FDR	GOTERM_CC_FAT	GO:0000267~cell fraction	21	0.0830513	WNT5A, KCND2, ATG12, SEC11C, LIMK2, GRIN1, CYP2E1, NPR3, PCDHGA2, IARS, CTTNBP2, LRAT, PPP2CA, YWHAQ, CRH, RAB14, GNAS, JAK2, INSR, LHB, SPTAN1	1	0.94335	68.5711
GOTERM_BP_FAT	GO:0043406~positive regulation of MAP kinase activity	3	0.399359	MAP3K5, ADRA2A, MAP3K11	1	0.960479	99.9822	GOTERM_BP_FAT	GO:0030099~myeloid cell differentiation	3	0.155459	TM7SF4, EPAS1, NKX2-3	1	0.688658	93.1388	GOTERM_CC_FAT	GO:0005624~membrane fraction	14	0.278758	KCND2, SEC11C, ATG12, GRIN1, NPR3, CYP2E1, PCDHGA2, CTTNBP2, LRAT, RAB14, JAK2, GNAS, INSR, SPTAN1	1	0.972859	98.7251
GOTERM_BP_FAT	GO:0001932~regulation of protein amino acid phosphorylation	4	0.415343	CCND1, MAP3K5, BCL2, MAP3K11	1	0.964207	99.9887	GOTERM_BP_FAT	GO:0030097~hemopoiesis	4	0.263102	TM7SF4, EPAS1, NKX2-5, NKX2-3	1	0.849309	99.2103	GOTERM_CC_FAT	GO:0005626~insoluble fraction	14	0.323715	KCND2, SEC11C, ATG12, GRIN1, NPR3, CYP2E1, PCDHGA2, CTTNBP2, LRAT, RAB14, JAK2, GNAS, INSR, SPTAN1	1	0.973813	99.4601
GOTERM_BP_FAT	GO:0045860~positive regulation of protein kinase activity	5	0.423646	CCND1, MAP3K5, ADRA2A, CDC25B, MAP3K11	1	0.96525	99.9912	GOTERM_BP_FAT	GO:0048534~hemopoietic or lymphoid organ development	4	0.312425	TM7SF4, EPAS1, NKX2-5, NKX2-3	1	0.89503	99.7368
GOTERM_BP_FAT	GO:0033674~positive regulation of kinase activity	5	0.455244	CCND1, MAP3K5, ADRA2A, CDC25B, MAP3K11	1	0.97211	99.9966	GOTERM_BP_FAT	GO:0002520~immune system development	4	0.34552	TM7SF4, EPAS1, NKX2-5, NKX2-3	1	0.919656	99.8796	Annotation Cluster 41	Enrichment Score: 0.6654362671271402
GOTERM_BP_FAT	GO:0032268~regulation of cellular protein metabolic process	9	0.461935	ZFP36L1, CCND1, MAP3K5, BCL2, PCSK9, ITGA2, IGF2BP3, CLN8, MAP3K11	1	0.973111	99.9972									Category	Term	Count	PValue	Genes	Bonferroni	Benjamini	FDR
GOTERM_BP_FAT	GO:0007243~protein kinase cascade	7	0.466276	DUSP4, MAP3K5, ADRA2A, ROR2, TANK, MAP3K11, DUSP6	1	0.973727	99.9976	Annotation Cluster 36	Enrichment Score: 0.5087008657548858							GOTERM_BP_FAT	GO:0045664~regulation of neuron differentiation	7	0.0350572	ISL2, ATOH1, LBX1, BARHL2, GRIN1, POU3F2, NKX2-2	1	0.520486	45.519
GOTERM_BP_FAT	GO:0051347~positive regulation of transferase activity	5	0.489684	CCND1, MAP3K5, ADRA2A, CDC25B, MAP3K11	1	0.978153	99.9989	Category	Term	Count	PValue	Genes	Bonferroni	Benjamini	FDR	GOTERM_BP_FAT	GO:0010769~regulation of cell morphogenesis involved in differentiation	4	0.16256	SMAD7, BARHL2, GRIN1, POU3F2	1	0.885582	95.1156
GOTERM_BP_FAT	GO:0007242~intracellular signaling cascade	17	0.816237	RAP2B, TOLLIP, RBM4, RASL12, TANK, DUSP4, MLL5, CCND1, MAP3K5, RASGRF1, RAB28, ADRA2A, ROR2, RAP1A, NFATC1, MAP3K11, DUSP6	1	0.999544	100	SP_PIR_KEYWORDS	calcium	10	0.0469121	PCDHGA12, DCHS2, PCDHGA10, PCDHGA11, TPO, PCDHGC3, CACNA1F, PCDHGA4, PCDHGA3, PCDHGB5, PCDHGB4	0.999716	0.31015	44.3551	GOTERM_BP_FAT	GO:0050770~regulation of axonogenesis	3	0.264139	BARHL2, GRIN1, POU3F2	1	0.93901	99.4591
GOTERM_BP_FAT	GO:0031399~regulation of protein modification process	4	0.831566	CCND1, MAP3K5, BCL2, MAP3K11	1	0.999653	100	SP_PIR_KEYWORDS	glycoprotein	33	0.0852306	DCHS2, GLB1L, GRIK2, C20ORF103, DPP10, PLVAP, PCDHGC3, PCDHGA4, NRN1, PCDHGA3, TMEM63B, COL9A1, COL9A2, BDNF, HRH3, TPO, PRSS16, NXPH1, ISLR2, PCDHGA12, COL4A2, PCDHGA10, PCDHGA11, DUOXA2, FZD1, COL5A1, PCDHGB5, PCDHGB4, SEMA4C, CACNA1F, SLITRK5, WNT7A, ADAMTS5, SEL1L	1	0.441482	66.2706	GOTERM_BP_FAT	GO:0010975~regulation of neuron projection development	3	0.35819	BARHL2, GRIN1, POU3F2	1	0.966188	99.9472
								UP_SEQ_FEATURE	glycosylation site:N-linked (GlcNAc...)	30	0.173499	DCHS2, GLB1L, GRIK2, C20ORF103, DPP10, PLVAP, PCDHGC3, PCDHGA4, PCDHGA3, TMEM63B, COL9A1, BDNF, HRH3, TPO, PRSS16, NXPH1, ISLR2, PCDHGA12, COL4A2, PCDHGA10, PCDHGA11, DUOXA2, FZD1, PCDHGB5, PCDHGB4, SEMA4C, CACNA1F, SLITRK5, WNT7A, ADAMTS5, SEL1L	1	0.966032	93.1589	GOTERM_BP_FAT	GO:0022604~regulation of cell morphogenesis	4	0.398173	SMAD7, BARHL2, GRIN1, POU3F2	1	0.975116	99.9823
Annotation Cluster 32	Enrichment Score: 1.0071784527686904							GOTERM_CC_FAT	GO:0005886~plasma membrane	22	0.213918	PCDHGA12, DHH, PCDHGA10, TM7SF4, PCDHGA11, GRIK2, FSCN1, PLVAP, PCDHGC3, PCDHGA4, NRN1, PRKCE, PCDHGA3, PCDHGB5, PCDHGB4, SLC16A3, GNAL, HRH3, RASL10A, TPO, OLIG2, CACNA1F, EPN1	1	0.845877	93.12	GOTERM_BP_FAT	GO:0031344~regulation of cell projection organization	3	0.473775	BARHL2, GRIN1, POU3F2	1	0.984597	99.9982
Category	Term	Count	PValue	Genes	Bonferroni	Benjamini	FDR	SP_PIR_KEYWORDS	cell membrane	17	0.214608	PCDHGA12, DHH, PCDHGA10, TM7SF4, PCDHGA11, GRIK2, PLVAP, PCDHGC3, PCDHGA4, NRN1, PCDHGA3, PCDHGB5, PCDHGB4, SLC16A3, HRH3, RASL10A, EPN1, ISLR2	1	0.757345	94.7511
GOTERM_CC_FAT	GO:0005874~microtubule	9	0.0461978	SPRY2, SHROOM3, NAV1, VAPA, TUBB2C, MAP7, DYNC1H1, TTLL1, MAP3K11	0.999997	0.882841	46.3456	GOTERM_MF_FAT	GO:0005509~calcium ion binding	10	0.229153	PCDHGA12, DCHS2, PCDHGA10, PCDHGA11, TPO, PCDHGC3, CACNA1F, PCDHGA4, PCDHGA3, PCDHGB5, PCDHGB4	1	0.877228	95.3075	Annotation Cluster 42	Enrichment Score: 0.662894908009823
GOTERM_CC_FAT	GO:0015630~microtubule cytoskeleton	14	0.0660816	SDCCAG8, SHROOM3, VAPA, TUBB2C, CETN3, TTLL1, CDC25B, SPRY2, NAV1, MAP7, DYNC1H1, APEX1, MYC, MAP3K11	1	0.929808	59.3397	UP_SEQ_FEATURE	topological domain:Extracellular	20	0.250448	PCDHGA12, PCDHGA10, PCDHGA11, DUOXA2, GRIK2, C20ORF103, DPP10, FZD1, PLVAP, PCDHGC3, PCDHGA4, PCDHGA3, PCDHGB5, PCDHGB4, SLC16A3, HRH3, SEMA4C, TPO, CACNA1F, SLITRK5, ISLR2	1	0.989416	98.2713	Category	Term	Count	PValue	Genes	Bonferroni	Benjamini	FDR
GOTERM_CC_FAT	GO:0044430~cytoskeletal part	18	0.0900487	SDCCAG8, SHROOM3, EPB41, VAPA, TUBB2C, BFSP1, CETN3, GAS2, TTLL1, CD2AP, CDC25B, SPRY2, NAV1, MAP7, DYNC1H1, APEX1, MYC, MAP3K11	1	0.861154	71.1233	UP_SEQ_FEATURE	topological domain:Cytoplasmic	22	0.435449	PCDHGA12, PCDHGA10, TM7SF4, PCDHGA11, DUOXA2, GRIK2, C20ORF103, DPP10, FZD1, PLVAP, PCDHGC3, PCDHGA4, PCDHGA3, PCDHGB5, PCDHGB4, SLC16A3, HRH3, SEMA4C, TPO, CACNA1F, SLITRK5, SEL1L, ISLR2	1	0.999505	99.968	GOTERM_CC_FAT	GO:0005856~cytoskeleton	25	0.0892589	ABLIM2, TPM1, FRMD1, ARHGAP21, TUBGCP3, ANK1, MYOM2, PPP2CA, CAMSAP1, TEKT3, APEX1, ELMOD1, KCND2, GRIN1, CENPF, PCM1, FNBP1, KRTAP5-6, CEP350, PSMA3, SNTG1, JAK2, MAP7, IFT88, SPTAN1	1	0.938345	71.2957
GOTERM_CC_FAT	GO:0005856~cytoskeleton	24	0.108861	SDCCAG8, SHROOM3, ANKRA2, VAPA, EPB41, TUBB2C, BFSP1, CETN3, PDLIM3, GAS2, DPYSL2, TTLL1, CD2AP, ZNF174, CDC25B, ARHGAP21, SPRY2, NAV1, FAAH, MAP7, DYNC1H1, MYC, APEX1, MAP3K11	1	0.859048	78.0659	GOTERM_CC_FAT	GO:0031224~intrinsic to membrane	26	0.625562	DCHS2, TM7SF4, GRIK2, C20ORF103, DPP10, PLVAP, PCDHGC3, PCDHGA4, NRN1, PCDHGA3, TMEM63B, HRH3, PRRT1, TPO, ISLR2, PCDHGA12, PCDHGA10, PCDHGA11, DUOXA2, FZD1, PCDHGB5, PCDHGB4, SLC16A3, SEMA4C, CACNA1F, SLITRK5, SEL1L	1	0.995962	99.9982	GOTERM_CC_FAT	GO:0044430~cytoskeletal part	16	0.247444	KCND2, GRIN1, CENPF, PCM1, TPM1, TUBGCP3, KRTAP5-6, MYOM2, CEP350, PPP2CA, CAMSAP1, TEKT3, MAP7, APEX1, IFT88, SPTAN1	1	0.966245	97.7516
SP_PIR_KEYWORDS	microtubule	7	0.164137	SPRY2, SHROOM3, NAV1, TUBB2C, MAP7, DYNC1H1, TTLL1	1	0.804373	90.571	GOTERM_CC_FAT	GO:0016021~integral to membrane	25	0.637388	DCHS2, TM7SF4, GRIK2, C20ORF103, DPP10, PLVAP, PCDHGC3, PCDHGA4, PCDHGA3, TMEM63B, HRH3, PRRT1, TPO, ISLR2, PCDHGA12, PCDHGA10, PCDHGA11, DUOXA2, FZD1, PCDHGB5, PCDHGB4, SLC16A3, SEMA4C, CACNA1F, SLITRK5, SEL1L	1	0.995449	99.9987	GOTERM_CC_FAT	GO:0015630~microtubule cytoskeleton	10	0.464714	TUBGCP3, CEP350, PPP2CA, CAMSAP1, TEKT3, CENPF, MAP7, PCM1, APEX1, IFT88	1	0.982554	99.9762
SP_PIR_KEYWORDS	cytoskeleton	14	0.184361	SDCCAG8, SHROOM3, EPB41, ANKRA2, CETN3, BFSP1, GAS2, TTLL1, CD2AP, CDC25B, ARHGAP21, NAV1, FAAH, MAP3K11	1	0.824222	93.1709	UP_SEQ_FEATURE	transmembrane region	25	0.88569	DCHS2, TM7SF4, GRIK2, C20ORF103, DPP10, PLVAP, PCDHGC3, PCDHGA4, PCDHGA3, TMEM63B, HRH3, PRRT1, TPO, ISLR2, PCDHGA12, PCDHGA10, PCDHGA11, DUOXA2, FZD1, PCDHGB5, PCDHGB4, SLC16A3, SEMA4C, CACNA1F, SLITRK5, SEL1L	1	1	100
								SP_PIR_KEYWORDS	transmembrane	25	0.892873	DCHS2, TM7SF4, GRIK2, C20ORF103, DPP10, PLVAP, PCDHGC3, PCDHGA4, PCDHGA3, TMEM63B, HRH3, PRRT1, TPO, ISLR2, PCDHGA12, PCDHGA10, PCDHGA11, DUOXA2, FZD1, PCDHGB5, PCDHGB4, SLC16A3, SEMA4C, CACNA1F, SLITRK5, SEL1L	1	0.999981	100	Annotation Cluster 43	Enrichment Score: 0.6582896159033859
Annotation Cluster 33	Enrichment Score: 0.9827670927942957							SP_PIR_KEYWORDS	membrane	29	0.971159	DCHS2, DHH, TM7SF4, GRIK2, C20ORF103, DPP10, PLVAP, PCDHGC3, PCDHGA4, NRN1, PCDHGA3, TMEM63B, HRH3, RASL10A, PRRT1, TPO, ISLR2, PCDHGA12, PCDHGA10, PCDHGA11, DUOXA2, FZD1, PCDHGB5, PCDHGB4, SLC16A3, SEMA4C, CACNA1F, SLITRK5, EPN1, SEL1L	1	1	100	Category	Term	Count	PValue	Genes	Bonferroni	Benjamini	FDR
Category	Term	Count	PValue	Genes	Bonferroni	Benjamini	FDR									GOTERM_BP_FAT	GO:0043009~chordate embryonic development	10	0.171204	DLX1, CDX2, HOXA3, FOXF1, ZIC5, GNAS, TPM1, PCSK5, IFT88, FOXD3	1	0.893017	95.9062
UP_SEQ_FEATURE	domain:KH 1	3	0.0589266	FUBP1, TDRKH, IGF2BP3	1	0.985004	61.1925	Annotation Cluster 37	Enrichment Score: 0.47601611558442203							GOTERM_BP_FAT	GO:0009792~embryonic development ending in birth or egg hatching	10	0.175369	DLX1, CDX2, HOXA3, FOXF1, ZIC5, GNAS, TPM1, PCSK5, IFT88, FOXD3	1	0.896235	96.2425
UP_SEQ_FEATURE	domain:KH 2	3	0.0589266	FUBP1, TDRKH, IGF2BP3	1	0.985004	61.1925	Category	Term	Count	PValue	Genes	Bonferroni	Benjamini	FDR	GOTERM_BP_FAT	GO:0048706~embryonic skeletal system development	4	0.186857	DLX1, HOXA3, GNAS, PCSK5	1	0.902323	97.0406
INTERPRO	IPR004088:K Homology, type 1	3	0.115675	FUBP1, TDRKH, IGF2BP3	1	0.983659	82.988	GOTERM_BP_FAT	GO:0001708~cell fate specification	4	0.00666812	HOXC11, OLIG2, SOX9, NKX2-2	0.998976	0.0720999	10.0658	GOTERM_BP_FAT	GO:0001701~in utero embryonic development	5	0.414825	CDX2, FOXF1, TPM1, IFT88, FOXD3	1	0.976791	99.989
INTERPRO	IPR018111:K Homology, type 1, subgroup	3	0.127835	FUBP1, TDRKH, IGF2BP3	1	0.986314	86.0647	GOTERM_CC_FAT	GO:0005730~nucleolus	4	0.643696	TBX3, OLIG2, SOX9, NKX2-2	1	0.994546	99.999
INTERPRO	IPR004087:K Homology	3	0.134023	FUBP1, TDRKH, IGF2BP3	1	0.985724	87.4235	GOTERM_CC_FAT	GO:0043232~intracellular non-membrane-bounded organelle	7	0.989659	KRT27, TBX3, FSCN1, SEMA4C, OLIG2, SOX9, NKX2-2	1	1	100	Annotation Cluster 44	Enrichment Score: 0.6575595470520247
SMART	SM00322:KH	3	0.184377	FUBP1, TDRKH, IGF2BP3	1	0.961644	90.6222	GOTERM_CC_FAT	GO:0043228~non-membrane-bounded organelle	7	0.989659	KRT27, TBX3, FSCN1, SEMA4C, OLIG2, SOX9, NKX2-2	1	1	100	Category	Term	Count	PValue	Genes	Bonferroni	Benjamini	FDR
								GOTERM_CC_FAT	GO:0005856~cytoskeleton	3	0.991435	KRT27, FSCN1, SEMA4C	1	1	100	GOTERM_BP_FAT	GO:0033043~regulation of organelle organization	8	0.0733607	CTTNBP2, CDKN1B, TAF7, L3MBTL, CENPF, INSR, TPM1, SPTAN1	1	0.703117	72.6547
Annotation Cluster 34	Enrichment Score: 0.9455630874019644															GOTERM_BP_FAT	GO:0044087~regulation of cellular component biogenesis	6	0.0916522	CTTNBP2, CDKN1B, GRIN1, GHSR, TPM1, SPTAN1	1	0.755764	80.5226
Category	Term	Count	PValue	Genes	Bonferroni	Benjamini	FDR	Annotation Cluster 38	Enrichment Score: 0.4646624516957304							GOTERM_BP_FAT	GO:0010638~positive regulation of organelle organization	4	0.143879	CTTNBP2, CDKN1B, INSR, TPM1	1	0.855869	92.8899
SP_PIR_KEYWORDS	cell cycle	16	0.0096472	RBBP4, ZC3HC1, NUF2, CETN3, GAS2, PPP1CC, CD2AP, MCM6, CDC25B, CCNE2, MLL5, CCND1, CDKN1B, RGS2, CDKN2B, ING1	0.929099	0.232523	11.9863	Category	Term	Count	PValue	Genes	Bonferroni	Benjamini	FDR	GOTERM_BP_FAT	GO:0051495~positive regulation of cytoskeleton organization	3	0.18458	CTTNBP2, CDKN1B, TPM1	1	0.903448	96.8963
GOTERM_BP_FAT	GO:0007049~cell cycle	23	0.0124745	RBBP4, ZC3HC1, CETN3, NUF2, RPL24, GAS2, PPP1CC, CD2AP, MCM6, CDC25B, CCNE2, MLL5, CCND1, CDKN1B, CDKN2B, RGS2, BCL2, MAP3K8, DYNC1H1, ING1, MYC, NFATC1, MAP3K11	1	0.270923	19.1546	GOTERM_BP_FAT	GO:0019228~regulation of action potential in neuron	3	0.0625442	DHH, GRIK2, OLIG2	1	0.391014	64.0899	GOTERM_BP_FAT	GO:0032271~regulation of protein polymerization	3	0.293321	CTTNBP2, CDKN1B, SPTAN1	1	0.947461	99.7283
GOTERM_BP_FAT	GO:0000278~mitotic cell cycle	13	0.0263789	ZC3HC1, NUF2, CETN3, RPL24, CD2AP, CDC25B, CCND1, CDKN1B, CDKN2B, BCL2, DYNC1H1, MAP3K11, NFATC1	1	0.390934	36.4171	GOTERM_BP_FAT	GO:0001508~regulation of action potential	3	0.0931302	DHH, GRIK2, OLIG2	1	0.507563	78.7784	GOTERM_BP_FAT	GO:0051493~regulation of cytoskeleton organization	4	0.403464	CTTNBP2, CDKN1B, TPM1, SPTAN1	1	0.975253	99.9848
GOTERM_BP_FAT	GO:0022403~cell cycle phase	13	0.0514045	ZC3HC1, NUF2, CETN3, RPL24, CD2AP, CDC25B, CCND1, CDKN1B, CDKN2B, BCL2, DYNC1H1, MAP3K11, NFATC1	1	0.527579	59.0946	GOTERM_BP_FAT	GO:0048878~chemical homeostasis	7	0.189422	DHH, HRH3, EPAS1, GRIK2, OLIG2, CACNA1F, NR5A2	1	0.749737	96.4212	GOTERM_BP_FAT	GO:0043254~regulation of protein complex assembly	3	0.434314	CTTNBP2, CDKN1B, SPTAN1	1	0.980566	99.9938
GOTERM_BP_FAT	GO:0022402~cell cycle process	16	0.0594807	ZC3HC1, CETN3, NUF2, RPL24, GAS2, CD2AP, CDC25B, MLL5, CCND1, CDKN1B, CDKN2B, BCL2, DYNC1H1, MYC, MAP3K11, NFATC1	1	0.558938	64.6099	GOTERM_BP_FAT	GO:0042592~homeostatic process	9	0.205304	DHH, COL9A1, HRH3, EPAS1, GRIK2, OLIG2, CACNA1F, NR5A2, NKX2-3	1	0.767677	97.385	GOTERM_BP_FAT	GO:0051130~positive regulation of cellular component organization	4	0.598115	CTTNBP2, CDKN1B, INSR, TPM1	1	0.994947	100
GOTERM_BP_FAT	GO:0051301~cell division	10	0.0748105	CCNE2, CCND1, NOTCH1, ZC3HC1, NUF2, CETN3, POU3F3, PPP1CC, CD2AP, CDC25B	1	0.608749	73.209	GOTERM_BP_FAT	GO:0042391~regulation of membrane potential	3	0.268063	DHH, GRIK2, OLIG2	1	0.853806	99.2906
SP_PIR_KEYWORDS	cell division	8	0.146888	CCNE2, CCND1, ZC3HC1, NUF2, CETN3, PPP1CC, CD2AP, CDC25B	1	0.775867	87.6604	GOTERM_BP_FAT	GO:0019226~transmission of nerve impulse	5	0.27112	DHH, HRH3, GRIK2, OLIG2, WNT7A	1	0.855865	99.3361	Annotation Cluster 45	Enrichment Score: 0.653285542804408
SP_PIR_KEYWORDS	mitosis	6	0.192869	ZC3HC1, NUF2, CETN3, DYNC1H1, CD2AP, CDC25B	1	0.811998	94.0518	GOTERM_BP_FAT	GO:0006873~cellular ion homeostasis	5	0.311739	DHH, HRH3, GRIK2, OLIG2, CACNA1F	1	0.895785	99.7326	Category	Term	Count	PValue	Genes	Bonferroni	Benjamini	FDR
GOTERM_BP_FAT	GO:0000087~M phase of mitotic cell cycle	6	0.339947	ZC3HC1, NUF2, CETN3, RPL24, CD2AP, CDC25B	1	0.93685	99.9121	GOTERM_BP_FAT	GO:0055082~cellular chemical homeostasis	5	0.322003	DHH, HRH3, GRIK2, OLIG2, CACNA1F	1	0.902206	99.7893	GOTERM_BP_FAT	GO:0042391~regulation of membrane potential	6	0.0892382	KCND2, EGR2, SMAD7, JUN, GRIN1, POU3F2	1	0.748863	79.6228
GOTERM_BP_FAT	GO:0000279~M phase	7	0.49081	ZC3HC1, NUF2, CETN3, RPL24, DYNC1H1, CD2AP, CDC25B	1	0.978158	99.9989	GOTERM_BP_FAT	GO:0050801~ion homeostasis	5	0.37186	DHH, HRH3, GRIK2, OLIG2, CACNA1F	1	0.935051	99.9372	GOTERM_BP_FAT	GO:0001508~regulation of action potential	3	0.329561	KCND2, EGR2, POU3F2	1	0.957529	99.8891
GOTERM_BP_FAT	GO:0007067~mitosis	5	0.521806	ZC3HC1, NUF2, CETN3, CD2AP, CDC25B	1	0.982789	99.9996	GOTERM_BP_FAT	GO:0006874~cellular calcium ion homeostasis	3	0.402557	HRH3, GRIK2, CACNA1F	1	0.949091	99.9716	GOTERM_BP_FAT	GO:0019226~transmission of nerve impulse	8	0.372955	CTTNBP2, KCND2, EGR2, GRIN1, CRH, RAB14, POU3F2, GHSR	1	0.968245	99.9645
GOTERM_BP_FAT	GO:0000280~nuclear division	5	0.521806	ZC3HC1, NUF2, CETN3, CD2AP, CDC25B	1	0.982789	99.9996	GOTERM_BP_FAT	GO:0055074~calcium ion homeostasis	3	0.415726	HRH3, GRIK2, CACNA1F	1	0.953674	99.9801
GOTERM_BP_FAT	GO:0048285~organelle fission	5	0.545843	ZC3HC1, NUF2, CETN3, CD2AP, CDC25B	1	0.985964	99.9998	GOTERM_BP_FAT	GO:0006875~cellular metal ion homeostasis	3	0.436496	HRH3, GRIK2, CACNA1F	1	0.961644	99.9888	Annotation Cluster 46	Enrichment Score: 0.6417016911290233
								GOTERM_BP_FAT	GO:0055065~metal ion homeostasis	3	0.459386	HRH3, GRIK2, CACNA1F	1	0.969112	99.9942	Category	Term	Count	PValue	Genes	Bonferroni	Benjamini	FDR
Annotation Cluster 35	Enrichment Score: 0.9408001665702931							GOTERM_BP_FAT	GO:0019725~cellular homeostasis	5	0.468632	DHH, HRH3, GRIK2, OLIG2, CACNA1F	1	0.970872	99.9956	GOTERM_BP_FAT	GO:0051098~regulation of binding	8	0.0139737	RSF1, ID2, BLM, SMAD7, MALT1, JAK2, NR2F2, APEX1	1	0.308223	21.2965
Category	Term	Count	PValue	Genes	Bonferroni	Benjamini	FDR	GOTERM_BP_FAT	GO:0030005~cellular di-, tri-valent inorganic cation homeostasis	3	0.513018	HRH3, GRIK2, CACNA1F	1	0.980924	99.9989	GOTERM_BP_FAT	GO:0051090~regulation of transcription factor activity	5	0.0798953	ID2, SMAD7, MALT1, JAK2, NR2F2	1	0.722686	75.7575
GOTERM_BP_FAT	GO:0042981~regulation of apoptosis	22	0.0132589	CFLAR, ZC3HC1, HOXA13, TBX5, TUBB2C, SOX4, GCLM, GLI3, GDNF, NOTCH1, MAP3K5, CDKN1B, RASGRF1, BCL2, POU3F3, PCSK9, FOXC1, FAS, HSPA5, CLN8, MYC, MAP3K11	1	0.27866	20.2355	GOTERM_BP_FAT	GO:0055066~di-, tri-valent inorganic cation homeostasis	3	0.540786	HRH3, GRIK2, CACNA1F	1	0.985872	99.9996	GOTERM_BP_FAT	GO:0048534~hemopoietic or lymphoid organ development	7	0.233952	HOXA3, ID2, BLM, MMP9, L3MBTL, MALT1, JAK2	1	0.927663	98.9279
GOTERM_BP_FAT	GO:0043067~regulation of programmed cell death	22	0.0149467	CFLAR, ZC3HC1, HOXA13, TBX5, TUBB2C, SOX4, GCLM, GLI3, GDNF, NOTCH1, MAP3K5, CDKN1B, RASGRF1, BCL2, POU3F3, PCSK9, FOXC1, FAS, HSPA5, CLN8, MYC, MAP3K11	1	0.294707	22.5153	GOTERM_BP_FAT	GO:0050877~neurological system process	10	0.567895	DHH, GNAL, BDNF, HRH3, EPAS1, GRIK2, OLIG2, CACNA1F, WNT7A, SIX6	1	0.989117	99.9998	GOTERM_BP_FAT	GO:0002520~immune system development	7	0.280745	HOXA3, ID2, BLM, MMP9, L3MBTL, MALT1, JAK2	1	0.943664	99.6332
GOTERM_BP_FAT	GO:0010941~regulation of cell death	22	0.0156219	CFLAR, ZC3HC1, HOXA13, TBX5, TUBB2C, SOX4, GCLM, GLI3, GDNF, NOTCH1, MAP3K5, CDKN1B, RASGRF1, BCL2, POU3F3, PCSK9, FOXC1, FAS, HSPA5, CLN8, MYC, MAP3K11	1	0.299304	23.4101	GOTERM_BP_FAT	GO:0030003~cellular cation homeostasis	3	0.573952	HRH3, GRIK2, CACNA1F	1	0.989669	99.9999	GOTERM_BP_FAT	GO:0030097~hemopoiesis	6	0.320244	ID2, BLM, MMP9, L3MBTL, MALT1, JAK2	1	0.955713	99.8597
GOTERM_BP_FAT	GO:0043065~positive regulation of apoptosis	14	0.0174337	CFLAR, HOXA13, TBX5, TUBB2C, SOX4, NOTCH1, MAP3K5, CDKN1B, RASGRF1, BCL2, PCSK9, FAS, MYC, MAP3K11	1	0.324477	25.7632	GOTERM_BP_FAT	GO:0055080~cation homeostasis	3	0.638844	HRH3, GRIK2, CACNA1F	1	0.995366	100	GOTERM_BP_FAT	GO:0050867~positive regulation of cell activation	3	0.420812	BLM, MALT1, JAK2	1	0.97809	99.9908
GOTERM_BP_FAT	GO:0043068~positive regulation of programmed cell death	14	0.018514	CFLAR, HOXA13, TBX5, TUBB2C, SOX4, NOTCH1, MAP3K5, CDKN1B, RASGRF1, BCL2, PCSK9, FAS, MYC, MAP3K11	1	0.33403	27.1337	GOTERM_CC_FAT	GO:0044459~plasma membrane part	8	0.911799	SLC16A3, DHH, HRH3, GRIK2, RASL10A, TPO, PLVAP, CACNA1F	1	0.999843	100	GOTERM_BP_FAT	GO:0030099~myeloid cell differentiation	3	0.447647	ID2, MMP9, JAK2	1	0.981953	99.9959
GOTERM_BP_FAT	GO:0010942~positive regulation of cell death	14	0.0192618	CFLAR, HOXA13, TBX5, TUBB2C, SOX4, NOTCH1, MAP3K5, CDKN1B, RASGRF1, BCL2, PCSK9, FAS, MYC, MAP3K11	1	0.341594	28.0685									GOTERM_BP_FAT	GO:0002521~leukocyte differentiation	3	0.576018	BLM, MMP9, MALT1	1	0.993842	100
GOTERM_BP_FAT	GO:0006917~induction of apoptosis	9	0.13502	CFLAR, MAP3K5, CDKN1B, RASGRF1, TBX5, TUBB2C, PCSK9, FAS, MYC	1	0.748796	91.4304	Annotation Cluster 39	Enrichment Score: 0.21523360347869636							GOTERM_BP_FAT	GO:0050865~regulation of cell activation	3	0.658377	BLM, MALT1, JAK2	1	0.997435	100
GOTERM_BP_FAT	GO:0012502~induction of programmed cell death	9	0.136926	CFLAR, MAP3K5, CDKN1B, RASGRF1, TBX5, TUBB2C, PCSK9, FAS, MYC	1	0.746608	91.7447	Category	Term	Count	PValue	Genes	Bonferroni	Benjamini	FDR
BIOCARTA	h_HivnefPathway:HIV-I Nef: negative effector of Fas and TNF	4	0.139087	CFLAR, MAP3K5, BCL2, FAS	0.999996	0.984131	79.8859	GOTERM_BP_FAT	GO:0010033~response to organic substance	7	0.462432	DHH, GNAL, MSX1, HRH3, NR4A2, NKX2-5, LIN28B	1	0.969504	99.9947	Annotation Cluster 47	Enrichment Score: 0.6369847765098694
BIOCARTA	h_deathPathway:Induction of apoptosis through DR3 and DR4/5 Death Receptors	3	0.15697	CFLAR, BCL2, GAS2	0.999999	0.971077	83.9351	GOTERM_BP_FAT	GO:0009719~response to endogenous stimulus	4	0.593116	DHH, GNAL, NR4A2, NKX2-5	1	0.991723	99.9999	Category	Term	Count	PValue	Genes	Bonferroni	Benjamini	FDR
KEGG_PATHWAY	hsa04210:Apoptosis	4	0.194746	CFLAR, BCL2, FAS, AKT3	1	0.880757	91.2742	GOTERM_BP_FAT	GO:0044093~positive regulation of molecular function	4	0.824349	GNAL, FOXL2, NR4A2, NKX2-5	1	0.999845	100	GOTERM_BP_FAT	GO:0030155~regulation of cell adhesion	7	0.0218394	LAMA2, CDH13, SMAD7, PPP2CA, ONECUT2, JAK2, TPM1	1	0.400911	31.325
BIOCARTA	h_il2rbPathway:IL-2 Receptor Beta Chain in T cell Activation	3	0.198301	CFLAR, BCL2, FAS	1	0.952994	90.6225									GOTERM_BP_FAT	GO:0009968~negative regulation of signal transduction	4	0.714164	SMAD7, PPP2CA, ONECUT2, PRDM16	1	0.998528	100
GOTERM_BP_FAT	GO:0008624~induction of apoptosis by extracellular signals	4	0.260937	CFLAR, MAP3K5, RASGRF1, FAS	1	0.886348	99.4035	Annotation Cluster 40	Enrichment Score: 0.18319803816074068							GOTERM_BP_FAT	GO:0010648~negative regulation of cell communication	4	0.787058	SMAD7, PPP2CA, ONECUT2, PRDM16	1	0.99949	100
GOTERM_BP_FAT	GO:0008219~cell death	12	0.550983	CFLAR, TSPO, MAP3K5, CDKN1B, FGF14, RASGRF1, BCL2, GAS2, FAS, CLN8, MYC, MAP3K11	1	0.986091	99.9999	Category	Term	Count	PValue	Genes	Bonferroni	Benjamini	FDR
GOTERM_BP_FAT	GO:0016265~death	12	0.559967	CFLAR, TSPO, MAP3K5, CDKN1B, FGF14, RASGRF1, BCL2, GAS2, FAS, CLN8, MYC, MAP3K11	1	0.986841	99.9999	GOTERM_BP_FAT	GO:0050953~sensory perception of light stimulus	3	0.486629	EPAS1, CACNA1F, SIX6	1	0.974995	99.9974	Annotation Cluster 48	Enrichment Score: 0.5980402642441365
GOTERM_BP_FAT	GO:0012501~programmed cell death	9	0.724365	CFLAR, TSPO, MAP3K5, CDKN1B, RASGRF1, BCL2, GAS2, FAS, MYC	1	0.997944	100	GOTERM_BP_FAT	GO:0007601~visual perception	3	0.486629	EPAS1, CACNA1F, SIX6	1	0.974995	99.9974	Category	Term	Count	PValue	Genes	Bonferroni	Benjamini	FDR
SP_PIR_KEYWORDS	Apoptosis	5	0.810168	CFLAR, MAP3K5, BCL2, GAS2, FAS	1	0.995188	100	GOTERM_BP_FAT	GO:0050890~cognition	6	0.823828	GNAL, BDNF, HRH3, EPAS1, CACNA1F, SIX6	1	0.999849	100	GOTERM_BP_FAT	GO:0003044~regulation of systemic arterial blood pressure mediated by a chemical signal	3	0.0629324	AGTR1, TPM1, PCSK5	1	0.675025	66.9179
GOTERM_BP_FAT	GO:0006915~apoptosis	8	0.820492	CFLAR, TSPO, MAP3K5, RASGRF1, BCL2, GAS2, FAS, MYC	1	0.999573	100	GOTERM_BP_FAT	GO:0007600~sensory perception	4	0.948364	GNAL, EPAS1, CACNA1F, SIX6	1	0.999999	100	GOTERM_BP_FAT	GO:0003073~regulation of systemic arterial blood pressure	3	0.110046	AGTR1, TPM1, PCSK5	1	0.799466	86.249
																GOTERM_BP_FAT	GO:0008217~regulation of blood pressure	4	0.19683	AGTR1, NPR3, TPM1, PCSK5	1	0.907204	97.6012
Annotation Cluster 36	Enrichment Score: 0.9136922616632844							Annotation Cluster 41	Enrichment Score: 0.1415293103778715							GOTERM_BP_FAT	GO:0003013~circulatory system process	5	0.308034	AGTR1, CTTNBP2, NPR3, TPM1, PCSK5	1	0.951522	99.8101
Category	Term	Count	PValue	Genes	Bonferroni	Benjamini	FDR	Category	Term	Count	PValue	Genes	Bonferroni	Benjamini	FDR	GOTERM_BP_FAT	GO:0008015~blood circulation	5	0.308034	AGTR1, CTTNBP2, NPR3, TPM1, PCSK5	1	0.951522	99.8101
GOTERM_BP_FAT	GO:0035176~social behavior	3	0.0377038	NPAS3, CHRNB2, CLN8	1	0.462741	47.848	GOTERM_CC_FAT	GO:0005624~membrane fraction	5	0.531722	SLC16A3, PCDHGA12, HRH3, GRIK2, DPP10, PCDHGC3	1	0.991681	99.9783	GOTERM_BP_FAT	GO:0060191~regulation of lipase activity	3	0.372342	AGTR1, JAK2, NPR3	1	0.968458	99.9639
GOTERM_BP_FAT	GO:0051705~behavioral interaction between organisms	3	0.109387	NPAS3, CHRNB2, CLN8	1	0.701147	85.9462	GOTERM_CC_FAT	GO:0005626~insoluble fraction	5	0.56115	SLC16A3, PCDHGA12, HRH3, GRIK2, DPP10, PCDHGC3	1	0.992502	99.9895	GOTERM_BP_FAT	GO:0051345~positive regulation of hydrolase activity	4	0.543969	AGTR1, JAK2, NPR3, TPM1	1	0.991881	99.9998
GOTERM_BP_FAT	GO:0007626~locomotory behavior	5	0.440122	NPAS3, CHRNB2, CLN8, GDNF, APBA1	1	0.968711	99.9946	GOTERM_CC_FAT	GO:0000267~cell fraction	5	0.759645	SLC16A3, PCDHGA12, HRH3, GRIK2, DPP10, PCDHGC3	1	0.99809	100	GOTERM_BP_FAT	GO:0051336~regulation of hydrolase activity	6	0.627229	AGTR1, ARFGAP3, JAK2, EVI5L, NPR3, TPM1	1	0.996238	100
								GOTERM_CC_FAT	GO:0005887~integral to plasma membrane	4	0.926582	SLC16A3, HRH3, GRIK2, TPO	1	0.999888	100
Annotation Cluster 37	Enrichment Score: 0.8938400737747028							GOTERM_CC_FAT	GO:0031226~intrinsic to plasma membrane	4	0.933459	SLC16A3, HRH3, GRIK2, TPO	1	0.999891	100	Annotation Cluster 49	Enrichment Score: 0.5946460581258665
Category	Term	Count	PValue	Genes	Bonferroni	Benjamini	FDR									Category	Term	Count	PValue	Genes	Bonferroni	Benjamini	FDR
GOTERM_CC_FAT	GO:0005912~adherens junction	6	0.0677927	SHROOM3, LAYN, CTNND2, ITGA2, ITGA2B, TES	1	0.908077	60.3095	Annotation Cluster 42	Enrichment Score: 0.1069857848852883							GOTERM_CC_FAT	GO:0000785~chromatin	6	0.171205	CDYL, ID2, HIST1H1C, JUN, L3MBTL, CENPF	1	0.96281	91.8469
GOTERM_CC_FAT	GO:0070161~anchoring junction	6	0.089914	SHROOM3, LAYN, CTNND2, ITGA2, ITGA2B, TES	1	0.881823	71.067	Category	Term	Count	PValue	Genes	Bonferroni	Benjamini	FDR	GOTERM_CC_FAT	GO:0005694~chromosome	10	0.251878	PRPF4B, CDYL, CDX2, ID2, BLM, HIST1H1C, JUN, PPP2CA, L3MBTL, CENPF	1	0.964064	97.9222
GOTERM_CC_FAT	GO:0016323~basolateral plasma membrane	6	0.128909	LAYN, ITGA2, MAP7, ATP7B, ITGA2B, TES	1	0.846939	83.7428	GOTERM_CC_FAT	GO:0016023~cytoplasmic membrane-bounded vesicle	3	0.736556	BDNF, SEMA4C, PRSS16	1	0.998364	100	GOTERM_BP_FAT	GO:0051726~regulation of cell cycle	9	0.267838	PTPRK, CDKN1B, ID2, BLM, JUN, L3MBTL, CENPF, INSR, HPGD	1	0.940095	99.5036
GOTERM_CC_FAT	GO:0005925~focal adhesion	4	0.162479	LAYN, ITGA2, ITGA2B, TES	1	0.843535	90.3088	GOTERM_CC_FAT	GO:0031988~membrane-bounded vesicle	3	0.752852	BDNF, SEMA4C, PRSS16	1	0.998367	100	GOTERM_CC_FAT	GO:0044427~chromosomal part	8	0.362108	CDYL, ID2, BLM, HIST1H1C, JUN, PPP2CA, L3MBTL, CENPF	1	0.970569	99.7525
GOTERM_CC_FAT	GO:0005924~cell-substrate adherens junction	4	0.174373	LAYN, ITGA2, ITGA2B, TES	1	0.84454	91.9719	GOTERM_CC_FAT	GO:0031410~cytoplasmic vesicle	3	0.811176	BDNF, SEMA4C, PRSS16	1	0.999102	100
GOTERM_CC_FAT	GO:0030055~cell-substrate junction	4	0.194711	LAYN, ITGA2, ITGA2B, TES	1	0.859624	94.2188	GOTERM_CC_FAT	GO:0031982~vesicle	3	0.829901	BDNF, SEMA4C, PRSS16	1	0.99922	100	Annotation Cluster 50	Enrichment Score: 0.5706415669636709
																Category	Term	Count	PValue	Genes	Bonferroni	Benjamini	FDR
Annotation Cluster 38	Enrichment Score: 0.8860678679219677							Annotation Cluster 43	Enrichment Score: 0.10071334054793722							GOTERM_CC_FAT	GO:0005798~Golgi-associated vesicle	3	0.136424	CLTB, RAB14, COPE	1	0.965341	85.8859
Category	Term	Count	PValue	Genes	Bonferroni	Benjamini	FDR	Category	Term	Count	PValue	Genes	Bonferroni	Benjamini	FDR	GOTERM_CC_FAT	GO:0044431~Golgi apparatus part	7	0.283125	CLTB, LIMK2, RAB14, GNAS, CYP2E1, PCSK5, COPE	1	0.97106	98.8244
GOTERM_BP_FAT	GO:0006399~tRNA metabolic process	6	0.0476671	IARS, NARS, LSM6, SSB, POP4, TRUB1	1	0.511855	56.2772	GOTERM_BP_FAT	GO:0012502~induction of programmed cell death	3	0.700767	FOXL2, GRIK2, PRKCE	1	0.998108	100	GOTERM_CC_FAT	GO:0009898~internal side of plasma membrane	7	0.31794	FNBP1, ARFGAP3, CLTB, RAB14, MCF2L, COPE, SERP1	1	0.974733	99.3952
GOTERM_BP_FAT	GO:0034660~ncRNA metabolic process	8	0.0973075	IARS, NARS, LSM6, MPHOSPH10, WBP11, SSB, POP4, TRUB1	1	0.671582	82.3438	GOTERM_BP_FAT	GO:0043068~positive regulation of programmed cell death	3	0.842679	FOXL2, GRIK2, PRKCE	1	0.999907	100	GOTERM_CC_FAT	GO:0030135~coated vesicle	4	0.424836	CLTB, GRIN1, RAB14, COPE	1	0.976388	99.9379
GOTERM_BP_FAT	GO:0008033~tRNA processing	4	0.131728	LSM6, SSB, POP4, TRUB1	1	0.743344	90.8609	GOTERM_BP_FAT	GO:0010942~positive regulation of cell death	3	0.844549	FOXL2, GRIK2, PRKCE	1	0.999908	100
GOTERM_BP_FAT	GO:0034470~ncRNA processing	6	0.215062	LSM6, MPHOSPH10, WBP11, SSB, POP4, TRUB1	1	0.843559	98.3456									Annotation Cluster 51	Enrichment Score: 0.569288775963633
SP_PIR_KEYWORDS	trna processing	3	0.282523	LSM6, POP4, TRUB1	1	0.872546	98.7385	Annotation Cluster 44	Enrichment Score: 0.05023698298271285							Category	Term	Count	PValue	Genes	Bonferroni	Benjamini	FDR
								Category	Term	Count	PValue	Genes	Bonferroni	Benjamini	FDR	GOTERM_BP_FAT	GO:0000302~response to reactive oxygen species	4	0.125979	PTPRK, JUN, TPM1, GJA3	1	0.830626	89.8885
Annotation Cluster 39	Enrichment Score: 0.8788974564961424							SP_PIR_KEYWORDS	Protease	3	0.780969	DHH, PRSS16, ADAMTS5	1	0.999496	100	GOTERM_BP_FAT	GO:0010035~response to inorganic substance	6	0.230191	PTPRK, JUN, NR4A2, INSR, TPM1, GJA3	1	0.928267	98.8347
Category	Term	Count	PValue	Genes	Bonferroni	Benjamini	FDR	GOTERM_MF_FAT	GO:0008233~peptidase activity	4	0.797374	DHH, DPP10, PRSS16, ADAMTS5	1	0.999697	100	GOTERM_BP_FAT	GO:0006979~response to oxidative stress	5	0.272843	PTPRK, JUN, JAK2, TPM1, GJA3	1	0.94209	99.5583
GOTERM_BP_FAT	GO:0006470~protein amino acid dephosphorylation	7	0.020977	DUSP4, PTPRZ1, BCL2, PPM1B, PPP1CC, CDC25B, DUSP6	1	0.352319	30.1699	GOTERM_MF_FAT	GO:0070011~peptidase activity, acting on L-amino acid peptides	3	0.915085	DPP10, PRSS16, ADAMTS5	1	0.999991	100	GOTERM_BP_FAT	GO:0009628~response to abiotic stimulus	6	0.667647	PTPRK, TRPM8, BLM, JUN, GRIN1, GJA3	1	0.997674	100
GOTERM_BP_FAT	GO:0016311~dephosphorylation	7	0.0407551	DUSP4, PTPRZ1, BCL2, PPM1B, PPP1CC, CDC25B, DUSP6	1	0.483404	50.5795	GOTERM_BP_FAT	GO:0006508~proteolysis	4	0.988383	DHH, DPP10, PRSS16, ADAMTS5	1	1	100
UP_SEQ_FEATURE	domain:Rhodanese	3	0.0416443	DUSP4, CDC25B, DUSP6	1	0.969081	48.4665	SP_PIR_KEYWORDS	hydrolase	4	0.995709	DHH, GLB1L, PRSS16, ADAMTS5	1	1	100	Annotation Cluster 52	Enrichment Score: 0.5628135544798373
SP_PIR_KEYWORDS	protein phosphatase	6	0.0546225	DUSP4, PTPRZ1, PPM1B, PPP1CC, CDC25B, DUSP6	1	0.573407	52.2796									Category	Term	Count	PValue	Genes	Bonferroni	Benjamini	FDR
INTERPRO	IPR001763:Rhodanese-like	3	0.0605668	DUSP4, CDC25B, DUSP6	1	0.926736	59.3521	Annotation Cluster 45	Enrichment Score: 0.006459152219094868							SP_PIR_KEYWORDS	lipoprotein	12	0.246991	WNT5A, AGTR1, CDH13, ANK1, KCNA2, RAB14, CENPF, GNAS, RAB12, NR2F2, INPP5A, KCNIP3	1	0.964602	97.817
SMART	SM00450:RHOD	3	0.0860313	DUSP4, CDC25B, DUSP6	0.99999	0.806981	64.8211	Category	Term	Count	PValue	Genes	Bonferroni	Benjamini	FDR	UP_SEQ_FEATURE	lipid moiety-binding region:S-palmitoyl cysteine	5	0.247595	WNT5A, AGTR1, KCNA2, GNAS, KCNIP3	1	0.999999	98.7675
SP_PIR_KEYWORDS	phosphoric monoester hydrolase	4	0.0977598	DUSP4, PTPRZ1, PPP1CC, CDC25B	1	0.689695	74.2035	SP_PIR_KEYWORDS	transducer	3	0.967037	GNAL, HRH3, FZD1	1	1	100	SP_PIR_KEYWORDS	palmitate	5	0.33507	WNT5A, AGTR1, KCNA2, GNAS, KCNIP3	1	0.972803	99.5919
GOTERM_MF_FAT	GO:0004721~phosphoprotein phosphatase activity	6	0.174828	DUSP4, PTPRZ1, PPM1B, PPP1CC, CDC25B, DUSP6	1	0.956311	93.0847	GOTERM_BP_FAT	GO:0007166~cell surface receptor linked signal transduction	8	0.990391	GNAL, MSX1, HRH3, GRIK2, FZD1, WNT7A, NKX2-2, SEL1L	1	1	100
GOTERM_MF_FAT	GO:0004722~protein serine/threonine phosphatase activity	3	0.205885	PPM1B, PPP1CC, DUSP6	1	0.960011	95.9431	GOTERM_BP_FAT	GO:0007186~G-protein coupled receptor protein signaling pathway	3	0.998557	GNAL, HRH3, FZD1	1	1	100	Annotation Cluster 53	Enrichment Score: 0.5587746474812756
GOTERM_MF_FAT	GO:0004725~protein tyrosine phosphatase activity	4	0.274658	DUSP4, PTPRZ1, CDC25B, DUSP6	1	0.98023	98.8484									Category	Term	Count	PValue	Genes	Bonferroni	Benjamini	FDR
GOTERM_MF_FAT	GO:0016791~phosphatase activity	7	0.279365	DUSP4, PTPRZ1, PPM1B, PPP1CC, LPIN1, CDC25B, DUSP6	1	0.974268	98.9481	Annotation Cluster 46	Enrichment Score: 0.005942321595502089							GOTERM_BP_FAT	GO:0033043~regulation of organelle organization	8	0.0733607	CTTNBP2, CDKN1B, TAF7, L3MBTL, CENPF, INSR, TPM1, SPTAN1	1	0.703117	72.6547
UP_SEQ_FEATURE	active site:Phosphocysteine intermediate	3	0.371213	DUSP4, PTPRZ1, DUSP6	1	0.999997	99.9276	Category	Term	Count	PValue	Genes	Bonferroni	Benjamini	FDR	GOTERM_BP_FAT	GO:0051783~regulation of nuclear division	3	0.220454	L3MBTL, CENPF, INSR	1	0.923049	98.5567
INTERPRO	IPR000387:Protein-tyrosine phosphatase	3	0.38058	DUSP4, PTPRZ1, DUSP6	1	0.999669	99.8993	GOTERM_BP_FAT	GO:0015031~protein transport	3	0.981148	DUOXA2, GRIK2, SNX10	1	1	100	GOTERM_BP_FAT	GO:0007088~regulation of mitosis	3	0.220454	L3MBTL, CENPF, INSR	1	0.923049	98.5567
INTERPRO	IPR000387:Dual-specific/protein-tyrosine phosphatase, conserved region	3	0.387097	DUSP4, PTPRZ1, DUSP6	1	0.999639	99.9136	GOTERM_BP_FAT	GO:0045184~establishment of protein localization	3	0.982028	DUOXA2, GRIK2, SNX10	1	1	100	GOTERM_BP_FAT	GO:0010564~regulation of cell cycle process	3	0.592497	L3MBTL, CENPF, INSR	1	0.994702	100
INTERPRO	IPR016130:Protein-tyrosine phosphatase, active site	3	0.43807	DUSP4, PTPRZ1, DUSP6	1	0.999743	99.9753	SP_PIR_KEYWORDS	transport	5	0.990719	SLC16A3, DUOXA2, GRIK2, CACNA1F, SNX10	1	1	100	GOTERM_BP_FAT	GO:0007346~regulation of mitotic cell cycle	3	0.760924	L3MBTL, CENPF, INSR	1	0.999166	100
								GOTERM_BP_FAT	GO:0008104~protein localization	3	0.991795	DUOXA2, GRIK2, SNX10	1	1	100
Annotation Cluster 40	Enrichment Score: 0.860565183798965															Annotation Cluster 54	Enrichment Score: 0.5580939882545664
Category	Term	Count	PValue	Genes	Bonferroni	Benjamini	FDR	Annotation Cluster 47	Enrichment Score: 0.002677678464652043							Category	Term	Count	PValue	Genes	Bonferroni	Benjamini	FDR
INTERPRO	IPR011993:Pleckstrin homology-type	10	0.0641464	ARHGAP21, IRS4, IRS2, GAB2, EPB41, RASGRF1, DOCK9, AKT3, APBA1, ARHGAP12	1	0.922699	61.5276	Category	Term	Count	PValue	Genes	Bonferroni	Benjamini	FDR	GOTERM_BP_FAT	GO:0032101~regulation of response to external stimulus	6	0.0534932	AGTR1, CDH13, GRIN1, JAK2, F7, GHSR	1	0.634954	60.7653
UP_SEQ_FEATURE	domain:PH	8	0.0832275	ARHGAP21, IRS4, IRS2, GAB2, DOCK9, SGEF, AKT3, ARHGAP12	1	0.9899	74.187	GOTERM_BP_FAT	GO:0007242~intracellular signaling cascade	6	0.965945	GNAL, RPS6KA6, HRH3, RASL10A, PRKCE, KNDC1	1	1	100	GOTERM_BP_FAT	GO:0044057~regulation of system process	10	0.0624127	LAMA2, AGTR1, TF, EGR2, SMAD7, GRIN1, CRH, JAK2, GHSR, TPM1	1	0.675358	66.6042
INTERPRO	IPR001849:Pleckstrin homology	9	0.0902473	ARHGAP21, IRS4, IRS2, GAB2, RASGRF1, DOCK9, SGEF, AKT3, ARHGAP12	1	0.96634	74.4055	SP_PIR_KEYWORDS	nucleotide-binding	4	0.997833	GNAL, RPS6KA6, RASL10A, PRKCE	1	1	100	GOTERM_BP_FAT	GO:0042391~regulation of membrane potential	6	0.0892382	KCND2, EGR2, SMAD7, JUN, GRIN1, POU3F2	1	0.748863	79.6228
SMART	SM00233:PH	9	0.200696	ARHGAP21, IRS4, IRS2, GAB2, RASGRF1, DOCK9, SGEF, AKT3, ARHGAP12	1	0.958662	92.5842	GOTERM_MF_FAT	GO:0032553~ribonucleotide binding	4	0.999932	GNAL, RPS6KA6, RASL10A, PRKCE	1	1	100	GOTERM_BP_FAT	GO:0006873~cellular ion homeostasis	10	0.122612	AGTR1, TF, KCND2, EGR2, TRPM8, SMAD7, JUN, GRIN1, POU3F2, JAK2	1	0.826248	89.2048
GOTERM_MF_FAT	GO:0030695~GTPase regulator activity	10	0.256214	ARHGAP21, RGS12, RGS2, RASGRF1, TBC1D14, DOCK9, SIPA1L3, TBC1D7, SGEF, ARHGAP12	1	0.978888	98.3674	GOTERM_MF_FAT	GO:0032555~purine ribonucleotide binding	4	0.999932	GNAL, RPS6KA6, RASL10A, PRKCE	1	1	100	GOTERM_BP_FAT	GO:0055082~cellular chemical homeostasis	10	0.131787	AGTR1, TF, KCND2, EGR2, TRPM8, SMAD7, JUN, GRIN1, POU3F2, JAK2	1	0.834514	90.9732
GOTERM_MF_FAT	GO:0060589~nucleoside-triphosphatase regulator activity	10	0.277073	ARHGAP21, RGS12, RGS2, RASGRF1, TBC1D14, DOCK9, SIPA1L3, TBC1D7, SGEF, ARHGAP12	1	0.978596	98.9006	GOTERM_MF_FAT	GO:0017076~purine nucleotide binding	4	0.999963	GNAL, RPS6KA6, RASL10A, PRKCE	1	1	100	GOTERM_BP_FAT	GO:0050801~ion homeostasis	10	0.171204	AGTR1, TF, KCND2, EGR2, TRPM8, SMAD7, JUN, GRIN1, POU3F2, JAK2	1	0.893017	95.9062
								GOTERM_MF_FAT	GO:0000166~nucleotide binding	4	0.999997	GNAL, RPS6KA6, RASL10A, PRKCE	1	1	100	GOTERM_BP_FAT	GO:0019725~cellular homeostasis	11	0.201099	AGTR1, TF, KCND2, EGR2, TRPM8, SMAD7, JUN, GRIN1, POU3F2, JAK2, APEX1	1	0.909886	97.8091
Annotation Cluster 41	Enrichment Score: 0.8305040283725955															GOTERM_BP_FAT	GO:0048878~chemical homeostasis	11	0.235708	AGTR1, TF, KCND2, EGR2, TRPM8, SMAD7, JUN, GRIN1, POU3F2, JAK2, INSR	1	0.926243	98.9689
Category	Term	Count	PValue	Genes	Bonferroni	Benjamini	FDR									GOTERM_BP_FAT	GO:0042592~homeostatic process	14	0.381772	TF, EGR2, KCND2, TRPM8, BLM, SMAD7, GRIN1, AGTR1, ID2, JUN, JAK2, POU3F2, APEX1, INSR	1	0.97099	99.9721
SP_PIR_KEYWORDS	cell shape	3	0.0456831	SHROOM3, GAS2, FN1	0.999997	0.549697	45.9821									GOTERM_BP_FAT	GO:0030005~cellular di-, tri-valent inorganic cation homeostasis	5	0.405918	AGTR1, TF, TRPM8, GRIN1, JAK2	1	0.975622	99.9858
GOTERM_BP_FAT	GO:0008360~regulation of cell shape	3	0.198351	SHROOM3, GAS2, FN1	1	0.829784	97.6362									GOTERM_BP_FAT	GO:0055066~di-, tri-valent inorganic cation homeostasis	5	0.451584	AGTR1, TF, TRPM8, GRIN1, JAK2	1	0.982286	99.9964
GOTERM_BP_FAT	GO:0022604~regulation of cell morphogenesis	4	0.355875	SHROOM3, GAS2, CHRNB2, FN1	1	0.944531	99.9419									GOTERM_BP_FAT	GO:0006874~cellular calcium ion homeostasis	4	0.475847	AGTR1, TRPM8, GRIN1, JAK2	1	0.984762	99.9983
																GOTERM_BP_FAT	GO:0030003~cellular cation homeostasis	5	0.49632	AGTR1, TF, TRPM8, GRIN1, JAK2	1	0.987091	99.9991
Annotation Cluster 42	Enrichment Score: 0.816505908876355															GOTERM_BP_FAT	GO:0055074~calcium ion homeostasis	4	0.500735	AGTR1, TRPM8, GRIN1, JAK2	1	0.987605	99.9993
Category	Term	Count	PValue	Genes	Bonferroni	Benjamini	FDR									GOTERM_BP_FAT	GO:0006875~cellular metal ion homeostasis	4	0.51538	AGTR1, TRPM8, GRIN1, JAK2	1	0.988903	99.9996
KEGG_PATHWAY	hsa05220:Chronic myeloid leukemia	5	0.053078	CCND1, CDKN1B, GAB2, MYC, AKT3	0.997233	0.625324	45.8875									GOTERM_BP_FAT	GO:0055065~metal ion homeostasis	4	0.54864	AGTR1, TRPM8, GRIN1, JAK2	1	0.992127	99.9999
KEGG_PATHWAY	hsa05221:Acute myeloid leukemia	4	0.0902558	CEBPA, CCND1, MYC, AKT3	0.999963	0.678611	65.5308									GOTERM_BP_FAT	GO:0055080~cation homeostasis	5	0.589461	AGTR1, TF, TRPM8, GRIN1, JAK2	1	0.994559	100
KEGG_PATHWAY	hsa05210:Colorectal cancer	4	0.21012	CCND1, BCL2, MYC, AKT3	1	0.859082	92.9768									GOTERM_MF_FAT	GO:0046873~metal ion transmembrane transporter activity	6	0.591474	TF, KCND2, TRPM8, KCNA2, GRIN1, KCNIP3	1	0.997339	99.9996
KEGG_PATHWAY	hsa05213:Endometrial cancer	3	0.238157	CCND1, MYC, AKT3	1	0.858931	95.3248									GOTERM_BP_FAT	GO:0015674~di-, tri-valent inorganic cation transport	3	0.781203	TF, TRPM8, GRIN1	1	0.999429	100
KEGG_PATHWAY	hsa04630:Jak-STAT signaling pathway	4	0.344944	SPRY2, CCND1, MYC, AKT3	1	0.898164	99.1463
																Annotation Cluster 55	Enrichment Score: 0.554416838642547
Annotation Cluster 43	Enrichment Score: 0.7806285928584441															Category	Term	Count	PValue	Genes	Bonferroni	Benjamini	FDR
Category	Term	Count	PValue	Genes	Bonferroni	Benjamini	FDR									GOTERM_BP_FAT	GO:0035239~tube morphogenesis	5	0.193092	SEMA5A, LBX1, HOXA11, FOXF1, ZIC5	1	0.905094	97.4039
GOTERM_CC_FAT	GO:0009897~external side of plasma membrane	6	0.0449813	ICAM1, PCSK9, ITGA2, CHRNB2, FAS, ITGA2B	0.999996	0.91822	45.4378									GOTERM_BP_FAT	GO:0048754~branching morphogenesis of a tube	3	0.307863	SEMA5A, HOXA11, FOXF1	1	0.952081	99.8093
GOTERM_CC_FAT	GO:0009986~cell surface	8	0.134256	ICAM1, LAYN, PCSK9, ITGA2, CHRNB2, FAS, HSPA5, ITGA2B	1	0.831769	85.0085									GOTERM_BP_FAT	GO:0001763~morphogenesis of a branching structure	3	0.365281	SEMA5A, HOXA11, FOXF1	1	0.96712	99.9563
GOTERM_BP_FAT	GO:0002684~positive regulation of immune system process	3	0.753613	ICAM1, ITGA2, CHRNB2	1	0.998639	100
																Annotation Cluster 56	Enrichment Score: 0.54933544718967
Annotation Cluster 44	Enrichment Score: 0.7747611636988561															Category	Term	Count	PValue	Genes	Bonferroni	Benjamini	FDR
Category	Term	Count	PValue	Genes	Bonferroni	Benjamini	FDR									GOTERM_BP_FAT	GO:0035239~tube morphogenesis	5	0.193092	SEMA5A, LBX1, HOXA11, FOXF1, ZIC5	1	0.905094	97.4039
GOTERM_BP_FAT	GO:0051270~regulation of cell motion	7	0.0851914	ICAM1, IRS2, CDKN1B, TBX5, BCL2, PAX6, ITGA2	1	0.641354	77.87									GOTERM_BP_FAT	GO:0048729~tissue morphogenesis	6	0.195156	SMAD7, HOXA11, FOXF1, ZIC5, FOXE1, TPM1	1	0.906407	97.5147
GOTERM_BP_FAT	GO:0051098~regulation of binding	6	0.0895821	ICAM1, EPB41, BCL2, ITGA2, NR2F2, APEX1	1	0.651211	79.602									GOTERM_BP_FAT	GO:0060429~epithelium development	6	0.237466	JUN, HOXA11, FOXF1, ZIC5, ONECUT2, NR2F2	1	0.924848	99.0086
GOTERM_BP_FAT	GO:0030334~regulation of cell migration	6	0.131668	ICAM1, IRS2, TBX5, BCL2, PAX6, ITGA2	1	0.745084	90.8502									GOTERM_BP_FAT	GO:0060562~epithelial tube morphogenesis	3	0.35819	HOXA11, FOXF1, ZIC5	1	0.966188	99.9472
GOTERM_BP_FAT	GO:0030335~positive regulation of cell migration	4	0.166165	ICAM1, IRS2, BCL2, ITGA2	1	0.787073	95.3954									GOTERM_BP_FAT	GO:0002009~morphogenesis of an epithelium	3	0.559061	HOXA11, FOXF1, ZIC5	1	0.992826	99.9999
GOTERM_BP_FAT	GO:0040012~regulation of locomotion	6	0.16805	ICAM1, IRS2, TBX5, BCL2, PAX6, ITGA2	1	0.787984	95.5686
GOTERM_BP_FAT	GO:0040017~positive regulation of locomotion	4	0.179705	ICAM1, IRS2, BCL2, ITGA2	1	0.805762	96.5106									Annotation Cluster 57	Enrichment Score: 0.5481407692438504
GOTERM_BP_FAT	GO:0051272~positive regulation of cell motion	4	0.20762	ICAM1, IRS2, BCL2, ITGA2	1	0.837055	98.0589									Category	Term	Count	PValue	Genes	Bonferroni	Benjamini	FDR
GOTERM_BP_FAT	GO:0030155~regulation of cell adhesion	3	0.605351	ICAM1, BCL2, ITGA2	1	0.991335	100									GOTERM_BP_FAT	GO:0007179~transforming growth factor beta receptor signaling pathway	3	0.249542	PTPRK, JUN, HPGD	1	0.929883	99.2444
																GOTERM_BP_FAT	GO:0007178~transmembrane receptor protein serine/threonine kinase signaling pathway	4	0.253635	PTPRK, SMAD7, JUN, HPGD	1	0.932431	99.3116
Annotation Cluster 45	Enrichment Score: 0.7673100543904974															GOTERM_BP_FAT	GO:0007167~enzyme linked receptor protein signaling pathway	8	0.358282	PTPRK, FGF8, PTPRG, SMAD7, JUN, JAK2, INSR, HPGD	1	0.965747	99.9474
Category	Term	Count	PValue	Genes	Bonferroni	Benjamini	FDR
GOTERM_CC_FAT	GO:0000785~chromatin	8	0.0247237	HIST1H2AB, RBBP4, SHPRH, BAZ1B, HIST2H2AC, FOXC1, TRIM24, CBX8	0.998897	0.896667	28.0741									Annotation Cluster 58	Enrichment Score: 0.5467902817953357
GOTERM_CC_FAT	GO:0044427~chromosomal part	10	0.114113	HIST1H2AB, RBBP4, SHPRH, BAZ1B, HIST2H2AC, NUF2, FOXC1, TRIM24, NUP107, CBX8	1	0.856103	79.7078									Category	Term	Count	PValue	Genes	Bonferroni	Benjamini	FDR
GOTERM_BP_FAT	GO:0006333~chromatin assembly or disassembly	5	0.12567	HIST1H2AB, SHPRH, BAZ1B, HIST2H2AC, CBX8	1	0.731425	89.7187									GOTERM_MF_FAT	GO:0008047~enzyme activator activity	10	0.0866244	ARHGAP21, ANKRD27, AGTR1, ARFGAP3, JUN, PRKAG2, RAP1GDS1, MALT1, EVI5L, ERRFI1	1	0.898516	71.794
GOTERM_CC_FAT	GO:0005694~chromosome	11	0.135132	HIST1H2AB, RBBP4, SHPRH, RGS12, BAZ1B, HIST2H2AC, NUF2, FOXC1, TRIM24, NUP107, CBX8	1	0.820378	85.2071									GOTERM_MF_FAT	GO:0005096~GTPase activator activity	7	0.143138	ARHGAP21, ANKRD27, ARFGAP3, JUN, RAP1GDS1, EVI5L, ERRFI1	1	0.948793	88.442
GOTERM_BP_FAT	GO:0016570~histone modification	5	0.152014	MLL5, BAZ1B, RBM4, CBX8, EP400	1	0.769467	93.8766									SP_PIR_KEYWORDS	GTPase activation	5	0.217625	ARHGAP21, ANKRD27, ARFGAP3, RAP1GDS1, EVI5L	1	0.9664	96.3436
GOTERM_BP_FAT	GO:0016569~covalent chromatin modification	5	0.165914	MLL5, BAZ1B, RBM4, CBX8, EP400	1	0.78972	95.3719									GOTERM_MF_FAT	GO:0030695~GTPase regulator activity	10	0.224442	ARHGAP21, ANKRD27, ARFGAP3, RHPN1, JUN, RAP1GDS1, EVI5L, VAV2, ERRFI1, MCF2L	1	0.971013	97.1285
SP_PIR_KEYWORDS	chromatin regulator	6	0.242277	MLL5, RBBP4, FOXA2, FOXA1, CBX8, EP400	1	0.842342	97.4114									GOTERM_MF_FAT	GO:0060589~nucleoside-triphosphatase regulator activity	10	0.243676	ARHGAP21, ANKRD27, ARFGAP3, RHPN1, JUN, RAP1GDS1, EVI5L, VAV2, ERRFI1, MCF2L	1	0.97674	97.9781
GOTERM_BP_FAT	GO:0006325~chromatin organization	9	0.271913	HIST1H2AB, MLL5, RBBP4, SHPRH, BAZ1B, HIST2H2AC, RBM4, CBX8, EP400	1	0.896039	99.537									GOTERM_MF_FAT	GO:0005083~small GTPase regulator activity	7	0.316882	ARFGAP3, RHPN1, JUN, EVI5L, VAV2, ERRFI1, MCF2L	1	0.986111	99.5123
GOTERM_BP_FAT	GO:0016568~chromatin modification	6	0.495531	MLL5, RBBP4, BAZ1B, RBM4, CBX8, EP400	1	0.979021	99.9991									GOTERM_MF_FAT	GO:0005099~Ras GTPase activator activity	3	0.448375	JUN, EVI5L, ERRFI1	1	0.995208	99.9754
GOTERM_BP_FAT	GO:0051276~chromosome organization	9	0.538119	HIST1H2AB, MLL5, RBBP4, SHPRH, BAZ1B, HIST2H2AC, RBM4, CBX8, EP400	1	0.985016	99.9998									GOTERM_BP_FAT	GO:0046578~regulation of Ras protein signal transduction	4	0.703828	ARFGAP3, EVI5L, VAV2, MCF2L	1	0.998384	100
																GOTERM_BP_FAT	GO:0051056~regulation of small GTPase mediated signal transduction	4	0.81257	ARFGAP3, EVI5L, VAV2, MCF2L	1	0.999689	100
Annotation Cluster 46	Enrichment Score: 0.7312741224109645
Category	Term	Count	PValue	Genes	Bonferroni	Benjamini	FDR									Annotation Cluster 59	Enrichment Score: 0.5299926338523235
GOTERM_CC_FAT	GO:0000785~chromatin	8	0.0247237	HIST1H2AB, RBBP4, SHPRH, BAZ1B, HIST2H2AC, FOXC1, TRIM24, CBX8	0.998897	0.896667	28.0741									Category	Term	Count	PValue	Genes	Bonferroni	Benjamini	FDR
GOTERM_CC_FAT	GO:0000790~nuclear chromatin	3	0.211357	RBBP4, FOXC1, TRIM24	1	0.858732	95.6085									GOTERM_MF_FAT	GO:0019900~kinase binding	6	0.185785	PTPRK, CTTNBP2, PRKAG2, JAK2, MAP2K7, INSR	1	0.958977	94.3352
GOTERM_CC_FAT	GO:0000228~nuclear chromosome	4	0.42175	RBBP4, RGS12, FOXC1, TRIM24	1	0.966159	99.9261									GOTERM_BP_FAT	GO:0007243~protein kinase cascade	9	0.233448	WNT5A, PPP2CA, PRKAG2, MALT1, JAK2, MAP2K7, INSR, NKIRAS2, IRAK1BP1	1	0.930253	98.9158
GOTERM_CC_FAT	GO:0044454~nuclear chromosome part	3	0.539158	RBBP4, FOXC1, TRIM24	1	0.985218	99.9963									GOTERM_MF_FAT	GO:0004713~protein tyrosine kinase activity	5	0.302229	CTTNBP2, LMTK2, JAK2, MAP2K7, INSR	1	0.984296	99.3439
																GOTERM_BP_FAT	GO:0000165~MAPKKK cascade	5	0.33473	WNT5A, PPP2CA, JAK2, MAP2K7, INSR	1	0.958372	99.9028
Annotation Cluster 47	Enrichment Score: 0.7192998473826644															SP_PIR_KEYWORDS	tyrosine-protein kinase	3	0.510277	JAK2, MAP2K7, INSR	1	0.993559	99.9934
Category	Term	Count	PValue	Genes	Bonferroni	Benjamini	FDR
GOTERM_BP_FAT	GO:0007610~behavior	11	0.0950581	NPAS1, NPAS3, RASGRF1, BCL2, CTNND2, CHRNB2, NR4A3, FOSB, CLN8, GDNF, APBA1	1	0.667122	81.5835									Annotation Cluster 60	Enrichment Score: 0.5203652172772185
GOTERM_BP_FAT	GO:0030534~adult behavior	4	0.166165	CHRNB2, NR4A3, CLN8, GDNF	1	0.787073	95.3954									Category	Term	Count	PValue	Genes	Bonferroni	Benjamini	FDR
GOTERM_BP_FAT	GO:0007626~locomotory behavior	5	0.440122	NPAS3, CHRNB2, CLN8, GDNF, APBA1	1	0.968711	99.9946									GOTERM_BP_FAT	GO:0034329~cell junction assembly	3	0.170481	PTPRK, SMAD7, LIM2	1	0.893462	95.845
																GOTERM_BP_FAT	GO:0034330~cell junction organization	3	0.27874	PTPRK, SMAD7, LIM2	1	0.944615	99.6154
Annotation Cluster 48	Enrichment Score: 0.7057422309389954															GOTERM_CC_FAT	GO:0030054~cell junction	8	0.578134	ARHGAP21, PTPRK, CTTNBP2, SMAD7, GRIN1, LIM2, SPTAN1, GJA3	1	0.987212	99.999
Category	Term	Count	PValue	Genes	Bonferroni	Benjamini	FDR
UP_SEQ_FEATURE	zinc finger region:NR C4-type	3	0.150758	NR2F6, NR4A3, NR2F2	1	0.998741	92.1669									Annotation Cluster 61	Enrichment Score: 0.5177705611447773
UP_SEQ_FEATURE	DNA-binding region:Nuclear receptor	3	0.150758	NR2F6, NR4A3, NR2F2	1	0.998741	92.1669									Category	Term	Count	PValue	Genes	Bonferroni	Benjamini	FDR
INTERPRO	IPR001628:Zinc finger, nuclear hormone receptor-type	3	0.172391	NR2F6, NR4A3, NR2F2	1	0.994892	93.4538									GOTERM_BP_FAT	GO:0046883~regulation of hormone secretion	4	0.0779758	CRH, JAK2, GHSR, SERP1	1	0.719696	74.8823
INTERPRO	IPR001723:Steroid hormone receptor	3	0.178953	NR2F6, NR4A3, NR2F2	1	0.994536	94.1632									GOTERM_BP_FAT	GO:0046887~positive regulation of hormone secretion	3	0.103742	CRH, JAK2, SERP1	1	0.789087	84.4941
INTERPRO	IPR008946:Nuclear hormone receptor, ligand-binding	3	0.185553	NR2F6, NR4A3, NR2F2	1	0.992601	94.804									GOTERM_BP_FAT	GO:0002791~regulation of peptide secretion	3	0.156579	JAK2, GHSR, SERP1	1	0.876917	94.4867
INTERPRO	IPR000536:Nuclear hormone receptor, ligand-binding, core	3	0.185553	NR2F6, NR4A3, NR2F2	1	0.992601	94.804									GOTERM_BP_FAT	GO:0051046~regulation of secretion	5	0.36153	AGTR1, CRH, JAK2, GHSR, SERP1	1	0.966576	99.9517
INTERPRO	IPR013088:Zinc finger, NHR/GATA-type	3	0.205545	NR2F6, NR4A3, NR2F2	1	0.994755	96.368									GOTERM_BP_FAT	GO:0051047~positive regulation of secretion	3	0.473775	CRH, JAK2, SERP1	1	0.984597	99.9982
GOTERM_MF_FAT	GO:0003707~steroid hormone receptor activity	3	0.213089	NR2F6, NR4A3, NR2F2	1	0.960482	96.4258									GOTERM_BP_FAT	GO:0051241~negative regulation of multicellular organismal process	3	0.663076	CRH, JAK2, GHSR	1	0.997581	100
SMART	SM00399:ZnF_C4	3	0.233811	NR2F6, NR4A3, NR2F2	1	0.966925	95.4632									GOTERM_BP_FAT	GO:0051050~positive regulation of transport	4	0.671131	CRH, JAK2, INSR, SERP1	1	0.997723	100
SMART	SM00430:HOLI	3	0.250494	NR2F6, NR4A3, NR2F2	1	0.965099	96.4866									GOTERM_BP_FAT	GO:0060341~regulation of cellular localization	4	0.746618	CRH, JAK2, GHSR, SERP1	1	0.999024	100
GOTERM_MF_FAT	GO:0004879~ligand-dependent nuclear receptor activity	3	0.278582	NR2F6, NR4A3, NR2F2	1	0.976604	98.9321
																Annotation Cluster 62	Enrichment Score: 0.5146694270275362
Annotation Cluster 49	Enrichment Score: 0.6931084552951055															Category	Term	Count	PValue	Genes	Bonferroni	Benjamini	FDR
Category	Term	Count	PValue	Genes	Bonferroni	Benjamini	FDR									GOTERM_BP_FAT	GO:0044057~regulation of system process	10	0.0624127	LAMA2, AGTR1, TF, EGR2, SMAD7, GRIN1, CRH, JAK2, GHSR, TPM1	1	0.675358	66.6042
GOTERM_BP_FAT	GO:0050906~detection of stimulus involved in sensory perception	3	0.0555293	NR2F6, ITGA2, MYC	1	0.544536	62.0053									GOTERM_BP_FAT	GO:0051969~regulation of transmission of nerve impulse	4	0.445262	LAMA2, TF, EGR2, GRIN1	1	0.981962	99.9956
GOTERM_BP_FAT	GO:0009582~detection of abiotic stimulus	3	0.185074	NR2F6, ITGA2, MYC	1	0.813111	96.8779									GOTERM_BP_FAT	GO:0031644~regulation of neurological system process	4	0.470801	LAMA2, TF, EGR2, GRIN1	1	0.984256	99.998
GOTERM_BP_FAT	GO:0009581~detection of external stimulus	3	0.198351	NR2F6, ITGA2, MYC	1	0.829784	97.6362									GOTERM_BP_FAT	GO:0050804~regulation of synaptic transmission	3	0.667723	LAMA2, EGR2, GRIN1	1	0.997634	100
GOTERM_BP_FAT	GO:0051606~detection of stimulus	3	0.392905	NR2F6, ITGA2, MYC	1	0.958667	99.9787
GOTERM_BP_FAT	GO:0009628~response to abiotic stimulus	7	0.427434	CCND1, MAT2A, BCL2, NR2F6, ITGA2, CHRNB2, MYC	1	0.96583	99.9921									Annotation Cluster 63	Enrichment Score: 0.5097758253227708
																Category	Term	Count	PValue	Genes	Bonferroni	Benjamini	FDR
Annotation Cluster 50	Enrichment Score: 0.6684601612677729															GOTERM_CC_FAT	GO:0045121~membrane raft	6	0.046413	CTTNBP2, CDH13, JAK2, GHSR, INSR, GJA3	0.999999	0.867767	46.9759
Category	Term	Count	PValue	Genes	Bonferroni	Benjamini	FDR									GOTERM_BP_FAT	GO:0010033~response to organic substance	16	0.185515	TF, EGR2, GRIN1, NR4A2, MALT1, CDH13, CTTNBP2, ID2, PPP2CA, JUN, DNAJB2, GNAS, CTSC, JAK2, GHSR, INSR	1	0.903307	96.9563
KEGG_PATHWAY	hsa04722:Neurotrophin signaling pathway	6	0.0760423	IRS4, IRS2, MAP3K5, BCL2, RAP1A, AKT3	0.999805	0.704838	58.9567									GOTERM_BP_FAT	GO:0046777~protein amino acid autophosphorylation	4	0.20693	CTTNBP2, LMTK2, JAK2, INSR	1	0.913044	98.0659
KEGG_PATHWAY	hsa04920:Adipocytokine signaling pathway	3	0.304696	IRS4, IRS2, AKT3	1	0.913965	98.3294									GOTERM_BP_FAT	GO:0009755~hormone-mediated signaling	3	0.220454	GNAS, JAK2, GHSR	1	0.923049	98.5567
KEGG_PATHWAY	hsa04910:Insulin signaling pathway	4	0.426282	IRS4, IRS2, PPP1CC, AKT3	1	0.909306	99.8082									GOTERM_BP_FAT	GO:0043434~response to peptide hormone stimulus	5	0.246945	CTTNBP2, EGR2, JAK2, GHSR, INSR	1	0.929518	99.1987
																GOTERM_BP_FAT	GO:0009967~positive regulation of signal transduction	7	0.276466	CDH13, MIER1, MALT1, JAK2, F7, GHSR, INSR	1	0.943836	99.5943
Annotation Cluster 51	Enrichment Score: 0.6599796095514299															GOTERM_MF_FAT	GO:0004713~protein tyrosine kinase activity	5	0.302229	CTTNBP2, LMTK2, JAK2, MAP2K7, INSR	1	0.984296	99.3439
Category	Term	Count	PValue	Genes	Bonferroni	Benjamini	FDR									GOTERM_BP_FAT	GO:0009719~response to endogenous stimulus	9	0.34422	CTTNBP2, CDH13, EGR2, GRIN1, NR4A2, GNAS, JAK2, GHSR, INSR	1	0.961737	99.9239
GOTERM_BP_FAT	GO:0033273~response to vitamin	4	0.0723455	CCND1, MLL5, BCL2, ITGA2	1	0.601035	71.9739									GOTERM_BP_FAT	GO:0032870~cellular response to hormone stimulus	4	0.408742	GNAS, JAK2, GHSR, INSR	1	0.975744	99.9869
GOTERM_BP_FAT	GO:0031667~response to nutrient levels	7	0.0743619	CCND1, MLL5, CDKN2B, BCL2, PCSK9, ITGA2, HSPA5	1	0.608976	72.9881									INTERPRO	IPR008266:Tyrosine protein kinase, active site	3	0.459808	LMTK2, JAK2, INSR	1	0.999995	99.9865
GOTERM_BP_FAT	GO:0009991~response to extracellular stimulus	7	0.11787	CCND1, MLL5, CDKN2B, BCL2, PCSK9, ITGA2, HSPA5	1	0.721226	88.0494									GOTERM_BP_FAT	GO:0032868~response to insulin stimulus	3	0.505369	EGR2, GHSR, INSR	1	0.987953	99.9994
GOTERM_BP_FAT	GO:0014070~response to organic cyclic substance	5	0.135309	CCND1, CDKN2B, BCL2, ITGA2, CHRNB2	1	0.747723	91.4788									INTERPRO	IPR001245:Tyrosine protein kinase	3	0.571348	LMTK2, JAK2, INSR	1	0.999987	99.9995
GOTERM_BP_FAT	GO:0009416~response to light stimulus	5	0.145239	CCND1, MAT2A, BCL2, NR2F6, CHRNB2	1	0.756052	92.993									SMART	SM00219:TyrKc	3	0.678254	LMTK2, JAK2, INSR	1	0.999937	99.9998
GOTERM_BP_FAT	GO:0007584~response to nutrient	5	0.152014	CCND1, MLL5, CDKN2B, BCL2, ITGA2	1	0.769467	93.8766									GOTERM_BP_FAT	GO:0009725~response to hormone stimulus	6	0.71062	CTTNBP2, EGR2, GNAS, JAK2, GHSR, INSR	1	0.998488	100
GOTERM_BP_FAT	GO:0031669~cellular response to nutrient levels	3	0.158962	CDKN2B, PCSK9, HSPA5	1	0.780759	94.6732
GOTERM_BP_FAT	GO:0009314~response to radiation	6	0.180172	CCND1, MAT2A, BCL2, NR2F6, CHRNB2, MYC	1	0.805184	96.544									Annotation Cluster 64	Enrichment Score: 0.5090251140487123
GOTERM_BP_FAT	GO:0051789~response to protein stimulus	4	0.231575	CCND1, BCL2, ITGA2, FAS	1	0.861244	98.846									Category	Term	Count	PValue	Genes	Bonferroni	Benjamini	FDR
GOTERM_BP_FAT	GO:0045471~response to ethanol	3	0.252325	CCND1, BCL2, CHRNB2	1	0.878581	99.2742									KEGG_PATHWAY	hsa04340:Hedgehog signaling pathway	3	0.251975	WNT5A, BTRC, WNT11	1	0.975315	96.0615
GOTERM_BP_FAT	GO:0031668~cellular response to extracellular stimulus	3	0.286309	CDKN2B, PCSK9, HSPA5	1	0.906319	99.6699									KEGG_PATHWAY	hsa04310:Wnt signaling pathway	5	0.255552	WNT5A, JUN, BTRC, PPP2CA, WNT11	1	0.964726	96.2663
GOTERM_BP_FAT	GO:0042493~response to drug	5	0.416485	CCND1, MAT2A, BCL2, ITGA2, GCLM	1	0.964221	99.9891									SP_PIR_KEYWORDS	wnt signaling pathway	4	0.317289	WNT5A, BTRC, TLE3, WNT11	1	0.968816	99.4176
GOTERM_BP_FAT	GO:0009628~response to abiotic stimulus	7	0.427434	CCND1, MAT2A, BCL2, NR2F6, ITGA2, CHRNB2, MYC	1	0.96583	99.9921									GOTERM_BP_FAT	GO:0016055~Wnt receptor signaling pathway	4	0.450409	WNT5A, BTRC, TLE3, WNT11	1	0.982293	99.9962
GOTERM_BP_FAT	GO:0032270~positive regulation of cellular protein metabolic process	3	0.875273	CCND1, BCL2, ITGA2	1	0.999886	100
GOTERM_BP_FAT	GO:0051247~positive regulation of protein metabolic process	3	0.89078	CCND1, BCL2, ITGA2	1	0.999931	100									Annotation Cluster 65	Enrichment Score: 0.46007476833758
																Category	Term	Count	PValue	Genes	Bonferroni	Benjamini	FDR
Annotation Cluster 52	Enrichment Score: 0.6575886746506697															GOTERM_BP_FAT	GO:0006470~protein amino acid dephosphorylation	5	0.20113	PTPRK, PPP6C, PTPRG, PPP2CA, RNGTT	1	0.908653	97.8106
Category	Term	Count	PValue	Genes	Bonferroni	Benjamini	FDR									GOTERM_BP_FAT	GO:0016311~dephosphorylation	5	0.285967	PTPRK, PPP6C, PTPRG, PPP2CA, RNGTT	1	0.945648	99.676
GOTERM_BP_FAT	GO:0034660~ncRNA metabolic process	8	0.0973075	IARS, NARS, LSM6, MPHOSPH10, WBP11, SSB, POP4, TRUB1	1	0.671582	82.3438									SP_PIR_KEYWORDS	phosphoric monoester hydrolase	3	0.301662	PTPRK, PTPRG, PPP2CA	1	0.968569	99.2098
GOTERM_BP_FAT	GO:0042254~ribosome biogenesis	5	0.162397	LSM6, MPHOSPH10, WBP11, RPL24, POP4	1	0.785222	95.0299									GOTERM_MF_FAT	GO:0004721~phosphoprotein phosphatase activity	5	0.319338	PTPRK, PPP6C, PTPRG, PPP2CA, RNGTT	1	0.98501	99.5362
GOTERM_BP_FAT	GO:0022613~ribonucleoprotein complex biogenesis	6	0.202105	SFRS5, LSM6, MPHOSPH10, WBP11, RPL24, POP4	1	0.833371	97.8169									SP_PIR_KEYWORDS	protein phosphatase	4	0.336148	PTPRK, PPP6C, PTPRG, PPP2CA	1	0.970435	99.6008
GOTERM_BP_FAT	GO:0006364~rRNA processing	4	0.212366	LSM6, MPHOSPH10, WBP11, POP4	1	0.841952	98.2467									INTERPRO	IPR000387:Protein-tyrosine phosphatase	3	0.372508	PTPRK, PTPRG, RNGTT	1	0.999997	99.8822
GOTERM_BP_FAT	GO:0034470~ncRNA processing	6	0.215062	LSM6, MPHOSPH10, WBP11, SSB, POP4, TRUB1	1	0.843559	98.3456									INTERPRO	IPR000387:Dual-specific/protein-tyrosine phosphatase, conserved region	3	0.378948	PTPRK, PTPRG, RNGTT	1	0.999996	99.8986
GOTERM_BP_FAT	GO:0016072~rRNA metabolic process	4	0.231575	LSM6, MPHOSPH10, WBP11, POP4	1	0.861244	98.846									GOTERM_MF_FAT	GO:0016791~phosphatase activity	6	0.421004	PTPRK, PPP6C, PTPRG, PPP2CA, INPP5A, RNGTT	1	0.994786	99.9516
SP_PIR_KEYWORDS	rrna processing	3	0.269737	LSM6, MPHOSPH10, WBP11	1	0.870397	98.4081									INTERPRO	IPR016130:Protein-tyrosine phosphatase, active site	3	0.429391	PTPRK, PTPRG, RNGTT	1	0.999991	99.9702
UP_SEQ_FEATURE	compositionally biased region:Poly-Lys	4	0.602157	CTNND2, MPHOSPH10, WBP11, POP4	1	1	99.9999									GOTERM_MF_FAT	GO:0004725~protein tyrosine phosphatase activity	3	0.5276	PTPRK, PTPRG, RNGTT	1	0.99737	99.9972
Annotation Cluster 53	Enrichment Score: 0.6430840168994354															Annotation Cluster 66	Enrichment Score: 0.4567740579240892
Category	Term	Count	PValue	Genes	Bonferroni	Benjamini	FDR									Category	Term	Count	PValue	Genes	Bonferroni	Benjamini	FDR
GOTERM_CC_FAT	GO:0048471~perinuclear region of cytoplasm	8	0.117783	VAPA, PCSK9, ITGA2, MAP7, HSPA5, CD2AP, APEX1, ATP7B	1	0.849483	80.7868									GOTERM_MF_FAT	GO:0005200~structural constituent of cytoskeleton	4	0.0890277	TUBGCP3, ANK1, TPM1, SPTAN1	1	0.890943	72.8132
GOTERM_BP_FAT	GO:0030100~regulation of endocytosis	3	0.238749	PCSK9, ITGA2, CD2AP	1	0.866163	99.0155									GOTERM_CC_FAT	GO:0030016~myofibril	4	0.124554	ABLIM2, ANK1, TPM1, SPTAN1	1	0.972777	83.0645
GOTERM_BP_FAT	GO:0060627~regulation of vesicle-mediated transport	3	0.418528	PCSK9, ITGA2, CD2AP	1	0.964161	99.9897									GOTERM_CC_FAT	GO:0043292~contractile fiber	4	0.159163	ABLIM2, ANK1, TPM1, SPTAN1	1	0.968064	90.1156
																GOTERM_CC_FAT	GO:0030017~sarcomere	3	0.299664	ANK1, TPM1, SPTAN1	1	0.974273	99.1391
Annotation Cluster 54	Enrichment Score: 0.6392013421844925															GOTERM_CC_FAT	GO:0044449~contractile fiber part	3	0.37252	ANK1, TPM1, SPTAN1	1	0.971591	99.8014
Category	Term	Count	PValue	Genes	Bonferroni	Benjamini	FDR									GOTERM_CC_FAT	GO:0015629~actin cytoskeleton	4	0.728949	ABLIM2, MYOM2, TPM1, SPTAN1	1	0.994016	100
GOTERM_BP_FAT	GO:0051338~regulation of transferase activity	11	0.0687174	CCNE2, SPRY2, CCND1, MAP3K5, CDKN1B, CDKN2B, ADRA2A, CLN8, CDC25B, MAP3K11, DUSP6	1	0.591804	70.0582									GOTERM_MF_FAT	GO:0003779~actin binding	5	0.747757	ABLIM2, FMNL3, SNTG1, TPM1, SPTAN1	1	0.999339	100
GOTERM_BP_FAT	GO:0043086~negative regulation of catalytic activity	8	0.172415	SPRY2, CDKN1B, ADRA2A, PCSK9, HSPA5, GABBR2, CLN8, DUSP6	1	0.794091	95.9464									GOTERM_MF_FAT	GO:0008092~cytoskeletal protein binding	7	0.83503	TUBGCP3, ABLIM2, FMNL3, ANK1, SNTG1, TPM1, SPTAN1	1	0.999888	100
GOTERM_BP_FAT	GO:0051348~negative regulation of transferase activity	4	0.212366	SPRY2, CDKN1B, CLN8, DUSP6	1	0.841952	98.2467									SP_PIR_KEYWORDS	actin-binding	3	0.863705	SNTG1, TPM1, SPTAN1	1	0.999517	100
GOTERM_BP_FAT	GO:0044092~negative regulation of molecular function	8	0.317305	SPRY2, CDKN1B, ADRA2A, PCSK9, HSPA5, GABBR2, CLN8, DUSP6	1	0.92474	99.8444
GOTERM_BP_FAT	GO:0006469~negative regulation of protein kinase activity	3	0.418528	SPRY2, CDKN1B, DUSP6	1	0.964161	99.9897									Annotation Cluster 67	Enrichment Score: 0.43868677858834393
GOTERM_BP_FAT	GO:0033673~negative regulation of kinase activity	3	0.437384	SPRY2, CDKN1B, DUSP6	1	0.96816	99.9941									Category	Term	Count	PValue	Genes	Bonferroni	Benjamini	FDR
																SP_PIR_KEYWORDS	mrna processing	8	0.12976	PAPOLB, PRPF4B, LSM6, ISY1, KHSRP, WBP11, CDC5L, RNGTT	1	0.914173	84.6457
Annotation Cluster 55	Enrichment Score: 0.6273640641569611															GOTERM_BP_FAT	GO:0006397~mRNA processing	9	0.23625	PAPOLB, PRPF4B, LSM6, ISY1, KHSRP, WBP11, CDC5L, HNRPLL, RNGTT	1	0.925734	98.9813
Category	Term	Count	PValue	Genes	Bonferroni	Benjamini	FDR									GOTERM_BP_FAT	GO:0016071~mRNA metabolic process	10	0.239255	DCPS, PAPOLB, PRPF4B, LSM6, ISY1, KHSRP, WBP11, CDC5L, HNRPLL, RNGTT	1	0.925513	99.0474
UP_SEQ_FEATURE	DNA-binding region:Basic motif	6	0.103286	CEBPA, NPAS1, NPAS3, FOSB, ATOH7, MYC	1	0.992556	81.7149									SP_PIR_KEYWORDS	mrna splicing	6	0.253907	PRPF4B, LSM6, ISY1, KHSRP, WBP11, CDC5L	1	0.964083	98.0723
UP_SEQ_FEATURE	domain:Helix-loop-helix motif	4	0.252187	NPAS1, NPAS3, ATOH7, MYC	1	0.999878	98.921									KEGG_PATHWAY	hsa03040:Spliceosome	4	0.375847	LSM6, ISY1, WBP11, CDC5L	1	0.967749	99.4759
INTERPRO	IPR001092:Basic helix-loop-helix dimerisation region bHLH	4	0.291594	NPAS1, NPAS3, ATOH7, MYC	1	0.999261	99.3037									GOTERM_BP_FAT	GO:0008380~RNA splicing	7	0.439912	PRPF4B, PPP2CA, LSM6, ISY1, KHSRP, WBP11, CDC5L	1	0.981304	99.9948
SMART	SM00353:HLH	4	0.407379	NPAS1, NPAS3, ATOH7, MYC	1	0.994209	99.7703									GOTERM_CC_FAT	GO:0030529~ribonucleoprotein complex	9	0.527564	ERG, PRPF4B, LSM6, ISY1, CDC5L, RPS5, APEX1, HNRPLL, SERP1	1	0.985245	99.9955
																SP_PIR_KEYWORDS	Spliceosome	3	0.591413	PRPF4B, ISY1, CDC5L	1	0.994344	99.9994
Annotation Cluster 56	Enrichment Score: 0.6214545959869935															GOTERM_CC_FAT	GO:0005681~spliceosome	3	0.626645	PRPF4B, ISY1, CDC5L	1	0.988303	99.9998
Category	Term	Count	PValue	Genes	Bonferroni	Benjamini	FDR									GOTERM_BP_FAT	GO:0006396~RNA processing	10	0.681586	PAPOLB, PRPF4B, PPP2CA, LSM6, ISY1, KHSRP, WBP11, CDC5L, HNRPLL, RNGTT	1	0.997908	100
GOTERM_BP_FAT	GO:0009725~response to hormone stimulus	10	0.101968	IRS2, CCND1, MAT2A, BCL2, RBM4, PCSK9, ITGA2, NR4A3, FAS, LPIN1	1	0.680687	83.826
GOTERM_BP_FAT	GO:0009719~response to endogenous stimulus	10	0.166023	IRS2, CCND1, MAT2A, BCL2, RBM4, PCSK9, ITGA2, NR4A3, FAS, LPIN1	1	0.788359	95.3821									Annotation Cluster 68	Enrichment Score: 0.4263955293400013
GOTERM_BP_FAT	GO:0043434~response to peptide hormone stimulus	5	0.21008	IRS2, BCL2, PCSK9, NR4A3, LPIN1	1	0.839665	98.1585									Category	Term	Count	PValue	Genes	Bonferroni	Benjamini	FDR
GOTERM_BP_FAT	GO:0032869~cellular response to insulin stimulus	3	0.30664	IRS2, PCSK9, LPIN1	1	0.91879	99.7977									GOTERM_BP_FAT	GO:0042981~regulation of apoptosis	18	0.186216	IER3, MMP9, GRIN1, NR4A2, MALT1, F7, VAV2, PRKCE, MCF2L, TAX1BP1, KCNIP3, CDH13, DLX1, CDKN1B, JUN, PPP2CA, CRH, JAK2	1	0.902853	97.0006
GOTERM_BP_FAT	GO:0032870~cellular response to hormone stimulus	4	0.365867	IRS2, PCSK9, ITGA2, LPIN1	1	0.948262	99.9554									GOTERM_BP_FAT	GO:0050730~regulation of peptidyl-tyrosine phosphorylation	3	0.191691	PPP2CA, JAK2, PRKCE	1	0.90597	97.3262
GOTERM_BP_FAT	GO:0032868~response to insulin stimulus	3	0.46806	IRS2, PCSK9, LPIN1	1	0.973921	99.9977									GOTERM_BP_FAT	GO:0043067~regulation of programmed cell death	18	0.198888	IER3, MMP9, GRIN1, NR4A2, MALT1, F7, VAV2, PRKCE, MCF2L, TAX1BP1, KCNIP3, CDH13, DLX1, CDKN1B, JUN, PPP2CA, CRH, JAK2	1	0.908465	97.7037
																GOTERM_BP_FAT	GO:0010941~regulation of cell death	18	0.203746	IER3, MMP9, GRIN1, NR4A2, MALT1, F7, VAV2, PRKCE, MCF2L, TAX1BP1, KCNIP3, CDH13, DLX1, CDKN1B, JUN, PPP2CA, CRH, JAK2	1	0.910545	97.9295
Annotation Cluster 57	Enrichment Score: 0.58808037979465															GOTERM_BP_FAT	GO:0043524~negative regulation of neuron apoptosis	3	0.242252	DLX1, GRIN1, NR4A2	1	0.927273	99.1093
Category	Term	Count	PValue	Genes	Bonferroni	Benjamini	FDR									GOTERM_BP_FAT	GO:0043065~positive regulation of apoptosis	10	0.295961	CDKN1B, MMP9, JUN, PPP2CA, GRIN1, CRH, JAK2, VAV2, PRKCE, MCF2L	1	0.9484	99.7451
GOTERM_CC_FAT	GO:0015630~microtubule cytoskeleton	14	0.0660816	SDCCAG8, SHROOM3, VAPA, TUBB2C, CETN3, TTLL1, CDC25B, SPRY2, NAV1, MAP7, DYNC1H1, APEX1, MYC, MAP3K11	1	0.929808	59.3397									GOTERM_BP_FAT	GO:0043068~positive regulation of programmed cell death	10	0.302257	CDKN1B, MMP9, JUN, PPP2CA, GRIN1, CRH, JAK2, VAV2, PRKCE, MCF2L	1	0.950146	99.7812
GOTERM_CC_FAT	GO:0005813~centrosome	5	0.467719	SDCCAG8, CETN3, APEX1, CDC25B, MAP3K11	1	0.975975	99.9752									GOTERM_BP_FAT	GO:0010942~positive regulation of cell death	10	0.310363	CDKN1B, MMP9, JUN, PPP2CA, GRIN1, CRH, JAK2, VAV2, PRKCE, MCF2L	1	0.9522	99.8207
GOTERM_CC_FAT	GO:0005815~microtubule organizing center	5	0.556792	SDCCAG8, CETN3, APEX1, CDC25B, MAP3K11	1	0.985826	99.9978									GOTERM_BP_FAT	GO:0043066~negative regulation of apoptosis	8	0.372955	IER3, CDH13, DLX1, GRIN1, NR4A2, MALT1, F7, TAX1BP1	1	0.968245	99.9645
																GOTERM_BP_FAT	GO:0043069~negative regulation of programmed cell death	8	0.385243	IER3, CDH13, DLX1, GRIN1, NR4A2, MALT1, F7, TAX1BP1	1	0.971766	99.9746
Annotation Cluster 58	Enrichment Score: 0.5659968323731023															GOTERM_BP_FAT	GO:0060548~negative regulation of cell death	8	0.398987	IER3, CDH13, DLX1, GRIN1, NR4A2, MALT1, F7, TAX1BP1	1	0.974997	99.9827
Category	Term	Count	PValue	Genes	Bonferroni	Benjamini	FDR									GOTERM_BP_FAT	GO:0006916~anti-apoptosis	5	0.445392	IER3, CDH13, MALT1, F7, TAX1BP1	1	0.981721	99.9956
GOTERM_CC_FAT	GO:0000785~chromatin	8	0.0247237	HIST1H2AB, RBBP4, SHPRH, BAZ1B, HIST2H2AC, FOXC1, TRIM24, CBX8	0.998897	0.896667	28.0741									GOTERM_BP_FAT	GO:0006917~induction of apoptosis	7	0.460096	CDKN1B, PPP2CA, CRH, JAK2, VAV2, PRKCE, MCF2L	1	0.983319	99.9972
GOTERM_BP_FAT	GO:0006333~chromatin assembly or disassembly	5	0.12567	HIST1H2AB, SHPRH, BAZ1B, HIST2H2AC, CBX8	1	0.731425	89.7187									GOTERM_BP_FAT	GO:0012502~induction of programmed cell death	7	0.464521	CDKN1B, PPP2CA, CRH, JAK2, VAV2, PRKCE, MCF2L	1	0.983728	99.9976
GOTERM_CC_FAT	GO:0000786~nucleosome	3	0.205422	HIST1H2AB, SHPRH, HIST2H2AC	1	0.867022	95.1529									GOTERM_BP_FAT	GO:0008624~induction of apoptosis by extracellular signals	3	0.570419	CRH, VAV2, MCF2L	1	0.993558	99.9999
GOTERM_BP_FAT	GO:0034622~cellular macromolecular complex assembly	8	0.257415	HIST1H2AB, SHPRH, SFRS5, FKBP4, HIST2H2AC, TUBB2C, RPL24, TNPO1	1	0.883422	99.3535									GOTERM_BP_FAT	GO:0016265~death	12	0.654549	IER3, ATOH1, CDKN1B, JUN, NR4A2, JAK2, NIPA1, VAV2, MCF2L, TAX1BP1, PHLDA2, KCNIP3	1	0.99732	100
GOTERM_CC_FAT	GO:0032993~protein-DNA complex	3	0.319312	HIST1H2AB, SHPRH, HIST2H2AC	1	0.940852	99.3675									GOTERM_BP_FAT	GO:0012501~programmed cell death	10	0.679344	IER3, ATOH1, CDKN1B, JUN, JAK2, VAV2, MCF2L, TAX1BP1, PHLDA2, KCNIP3	1	0.997866	100
GOTERM_BP_FAT	GO:0006334~nucleosome assembly	3	0.35357	HIST1H2AB, SHPRH, HIST2H2AC	1	0.94382	99.9383									GOTERM_BP_FAT	GO:0008219~cell death	11	0.755467	IER3, ATOH1, CDKN1B, JUN, JAK2, NIPA1, VAV2, MCF2L, TAX1BP1, PHLDA2, KCNIP3	1	0.999119	100
GOTERM_BP_FAT	GO:0034621~cellular macromolecular complex subunit organization	8	0.360494	HIST1H2AB, SHPRH, SFRS5, FKBP4, HIST2H2AC, TUBB2C, RPL24, TNPO1	1	0.946513	99.9486									GOTERM_BP_FAT	GO:0006915~apoptosis	9	0.778092	IER3, ATOH1, JUN, JAK2, VAV2, MCF2L, TAX1BP1, PHLDA2, KCNIP3	1	0.9994	100
GOTERM_BP_FAT	GO:0031497~chromatin assembly	3	0.373361	HIST1H2AB, SHPRH, HIST2H2AC	1	0.949946	99.9635
GOTERM_BP_FAT	GO:0065004~protein-DNA complex assembly	3	0.399359	HIST1H2AB, SHPRH, HIST2H2AC	1	0.960479	99.9822									Annotation Cluster 69	Enrichment Score: 0.42061028775967557
GOTERM_BP_FAT	GO:0034728~nucleosome organization	3	0.405782	HIST1H2AB, SHPRH, HIST2H2AC	1	0.961758	99.9852									Category	Term	Count	PValue	Genes	Bonferroni	Benjamini	FDR
GOTERM_BP_FAT	GO:0006323~DNA packaging	3	0.531911	HIST1H2AB, SHPRH, HIST2H2AC	1	0.984296	99.9997									UP_SEQ_FEATURE	domain:PDZ	4	0.247568	ARHGAP21, LIMK2, RHPN1, SNTG1	1	1	98.7668
GOTERM_BP_FAT	GO:0043623~cellular protein complex assembly	3	0.750236	FKBP4, TUBB2C, TNPO1	1	0.998574	100									INTERPRO	IPR001478:PDZ/DHR/GLGF	4	0.410323	ARHGAP21, LIMK2, RHPN1, SNTG1	1	0.999989	99.9521
																SMART	SM00228:PDZ	4	0.538701	ARHGAP21, LIMK2, RHPN1, SNTG1	1	0.999877	99.9875
Annotation Cluster 59	Enrichment Score: 0.548274966575289
Category	Term	Count	PValue	Genes	Bonferroni	Benjamini	FDR									Annotation Cluster 70	Enrichment Score: 0.4199074347639468
GOTERM_BP_FAT	GO:0051969~regulation of transmission of nerve impulse	5	0.194986	RASGRF1, CTNND2, ITGA2, CHRNB2, GDNF	1	0.825366	97.4624									Category	Term	Count	PValue	Genes	Bonferroni	Benjamini	FDR
GOTERM_BP_FAT	GO:0031644~regulation of neurological system process	5	0.213906	RASGRF1, CTNND2, ITGA2, CHRNB2, GDNF	1	0.843055	98.3038									GOTERM_BP_FAT	GO:0007631~feeding behavior	3	0.293321	GRIN1, CRH, GHSR	1	0.947461	99.7283
GOTERM_BP_FAT	GO:0007611~learning or memory	4	0.246186	RASGRF1, CTNND2, CHRNB2, CLN8	1	0.873336	99.1663									GOTERM_BP_FAT	GO:0007267~cell-cell signaling	12	0.30183	WNT5A, SEMA5A, CTTNBP2, KCND2, HOXA11, GRIN1, CRH, RAB14, GHSR, PCSK5, LHB, GJA3	1	0.950572	99.7789
GOTERM_BP_FAT	GO:0050804~regulation of synaptic transmission	4	0.355875	RASGRF1, CTNND2, CHRNB2, GDNF	1	0.944531	99.9419									GOTERM_BP_FAT	GO:0019226~transmission of nerve impulse	8	0.372955	CTTNBP2, KCND2, EGR2, GRIN1, CRH, RAB14, POU3F2, GHSR	1	0.968245	99.9645
GOTERM_BP_FAT	GO:0044057~regulation of system process	6	0.496409	RASGRF1, CTNND2, ITGA2, CHRNB2, TLX3, GDNF	1	0.978708	99.9991									GOTERM_BP_FAT	GO:0048585~negative regulation of response to stimulus	3	0.427583	GRIN1, CRH, GHSR	1	0.979215	99.9925
																GOTERM_BP_FAT	GO:0007268~synaptic transmission	6	0.563222	CTTNBP2, KCND2, GRIN1, CRH, RAB14, GHSR	1	0.993113	99.9999
Annotation Cluster 60	Enrichment Score: 0.531330325430918
Category	Term	Count	PValue	Genes	Bonferroni	Benjamini	FDR									Annotation Cluster 71	Enrichment Score: 0.418228168267365
GOTERM_BP_FAT	GO:0043523~regulation of neuron apoptosis	5	0.0651649	BCL2, PCSK9, GDNF, GCLM, MAP3K11	1	0.58501	68.0636									Category	Term	Count	PValue	Genes	Bonferroni	Benjamini	FDR
GOTERM_MF_FAT	GO:0042802~identical protein binding	14	0.297326	CEBPA, SNRPN, ITGA2, PPP1CC, GDNF, MCM6, MAP3K5, FAAH, BCL2, PCSK9, POP4, FAS, MAP3K11, ITGA2B	1	0.978344	99.2594									SP_PIR_KEYWORDS	cytoplasmic vesicle	6	0.265219	ARHGAP21, FNBP1, CLTB, GNAS, GPRC5A, COPE	1	0.961869	98.4311
GOTERM_MF_FAT	GO:0046983~protein dimerization activity	10	0.58473	CEBPA, MAP3K5, VAPA, BCL2, FAAH, ITGA2, FOSB, GDNF, GCLM, MAP3K11	1	0.996743	99.9995									GOTERM_CC_FAT	GO:0031982~vesicle	12	0.307207	ARHGAP21, CTTNBP2, TF, FNBP1, CLTB, GRIN1, ANP32E, RAB14, GNAS, GPRC5A, PCSK5, COPE	1	0.973899	99.255
GOTERM_MF_FAT	GO:0042803~protein homodimerization activity	6	0.661418	CEBPA, MAP3K5, BCL2, FAAH, GDNF, MAP3K11	1	0.99764	100									GOTERM_CC_FAT	GO:0031410~cytoplasmic vesicle	11	0.38013	ARHGAP21, CTTNBP2, TF, FNBP1, CLTB, GRIN1, ANP32E, RAB14, GPRC5A, PCSK5, COPE	1	0.971644	99.8312
																GOTERM_CC_FAT	GO:0030135~coated vesicle	4	0.424836	CLTB, GRIN1, RAB14, COPE	1	0.976388	99.9379
Annotation Cluster 61	Enrichment Score: 0.5242628016424051															GOTERM_CC_FAT	GO:0016023~cytoplasmic membrane-bounded vesicle	9	0.465362	CTTNBP2, TF, FNBP1, CLTB, GRIN1, ANP32E, RAB14, PCSK5, COPE	1	0.98113	99.9766
Category	Term	Count	PValue	Genes	Bonferroni	Benjamini	FDR									GOTERM_CC_FAT	GO:0031988~membrane-bounded vesicle	9	0.505419	CTTNBP2, TF, FNBP1, CLTB, GRIN1, ANP32E, RAB14, PCSK5, COPE	1	0.984946	99.9917
GOTERM_BP_FAT	GO:0065003~macromolecular complex assembly	15	0.17469	HIST1H2AB, SHPRH, FKBP4, TUBB2C, GTF2H4, RPL24, TRIM24, CD2AP, SFRS5, HIST2H2AC, FAS, MYC, TNPO1, APBA1, MAP3K11	1	0.797243	96.1311
GOTERM_BP_FAT	GO:0043933~macromolecular complex subunit organization	15	0.237442	HIST1H2AB, SHPRH, FKBP4, TUBB2C, GTF2H4, RPL24, TRIM24, CD2AP, SFRS5, HIST2H2AC, FAS, MYC, TNPO1, APBA1, MAP3K11	1	0.865593	98.9865									Annotation Cluster 72	Enrichment Score: 0.412376857108816
GOTERM_BP_FAT	GO:0034622~cellular macromolecular complex assembly	8	0.257415	HIST1H2AB, SHPRH, SFRS5, FKBP4, HIST2H2AC, TUBB2C, RPL24, TNPO1	1	0.883422	99.3535									Category	Term	Count	PValue	Genes	Bonferroni	Benjamini	FDR
GOTERM_BP_FAT	GO:0034621~cellular macromolecular complex subunit organization	8	0.360494	HIST1H2AB, SHPRH, SFRS5, FKBP4, HIST2H2AC, TUBB2C, RPL24, TNPO1	1	0.946513	99.9486									SP_PIR_KEYWORDS	Protease	9	0.213675	SEC11C, MMP9, PSMA3, MALT1, CTSC, F7, PCSK5, XPNPEP1, USP44	1	0.969028	96.0868
GOTERM_BP_FAT	GO:0006461~protein complex assembly	10	0.431055	FKBP4, TUBB2C, GTF2H4, TRIM24, FAS, CD2AP, TNPO1, MYC, APBA1, MAP3K11	1	0.966731	99.9929									GOTERM_MF_FAT	GO:0070011~peptidase activity, acting on L-amino acid peptides	10	0.281186	CRBN, SEC11C, MMP9, PSMA3, MALT1, CTSC, F7, PCSK5, XPNPEP1, USP44	1	0.980218	99.0065
GOTERM_BP_FAT	GO:0070271~protein complex biogenesis	10	0.431055	FKBP4, TUBB2C, GTF2H4, TRIM24, FAS, CD2AP, TNPO1, MYC, APBA1, MAP3K11	1	0.966731	99.9929									GOTERM_MF_FAT	GO:0008233~peptidase activity	10	0.33347	CRBN, SEC11C, MMP9, PSMA3, MALT1, CTSC, F7, PCSK5, XPNPEP1, USP44	1	0.985039	99.654
																SP_PIR_KEYWORDS	zymogen	4	0.336148	MMP9, CTSC, F7, PCSK5	1	0.970435	99.6008
Annotation Cluster 62	Enrichment Score: 0.5156171457974608															GOTERM_MF_FAT	GO:0004175~endopeptidase activity	6	0.4647	MMP9, PSMA3, MALT1, CTSC, F7, PCSK5	1	0.994804	99.9838
Category	Term	Count	PValue	Genes	Bonferroni	Benjamini	FDR									GOTERM_BP_FAT	GO:0006508~proteolysis	17	0.523563	SEC11C, ATG12, MMP9, BTRC, MALT1, F7, ATG3, XPNPEP1, CRBN, PSMA3, UBE2W, SH3RF2, CTSC, RNF149, PCSK5, USP44, RNF111	1	0.989543	99.9997
GOTERM_BP_FAT	GO:0045444~fat cell differentiation	4	0.0570009	CEBPA, CCND1, RGS2, PRDM16	1	0.551408	62.9957									SP_PIR_KEYWORDS	hydrolase	19	0.792291	PTPRK, PPP6C, SEC11C, BLM, PTPRG, MMP9, MALT1, F7, XPNPEP1, RNGTT, DCPS, PPP2CA, PSMA3, CTSC, LYPLAL1, SMARCA2, PCSK5, INPP5A, USP44	1	0.998482	100
GOTERM_BP_FAT	GO:0009968~negative regulation of signal transduction	4	0.668196	CCND1, RGS12, RGS2, PRDM16	1	0.995549	100
GOTERM_BP_FAT	GO:0010648~negative regulation of cell communication	4	0.745354	CCND1, RGS12, RGS2, PRDM16	1	0.998491	100									Annotation Cluster 73	Enrichment Score: 0.3996215137523428
																Category	Term	Count	PValue	Genes	Bonferroni	Benjamini	FDR
Annotation Cluster 63	Enrichment Score: 0.48651857693123685															GOTERM_BP_FAT	GO:0031401~positive regulation of protein modification process	6	0.188378	SMAD7, BTRC, PSMA3, PRKAG2, JAK2, INSR	1	0.90298	97.1334
Category	Term	Count	PValue	Genes	Bonferroni	Benjamini	FDR									GOTERM_BP_FAT	GO:0051438~regulation of ubiquitin-protein ligase activity	3	0.434314	SMAD7, BTRC, PSMA3	1	0.980566	99.9938
GOTERM_BP_FAT	GO:0030036~actin cytoskeleton organization	7	0.146987	SHROOM3, EPB41, BCL2, ADRA2A, PDLIM3, ANTXR1, LPIN1	1	0.758757	93.2319									GOTERM_BP_FAT	GO:0051340~regulation of ligase activity	3	0.454247	SMAD7, BTRC, PSMA3	1	0.9826	99.9967
GOTERM_BP_FAT	GO:0007010~cytoskeleton organization	11	0.155964	SHROOM3, EPB41, BCL2, ADRA2A, CETN3, PDLIM3, MAP7, ANTXR1, DYNC1H1, CLN8, LPIN1	1	0.777167	94.3423									GOTERM_BP_FAT	GO:0031398~positive regulation of protein ubiquitination	3	0.473775	SMAD7, BTRC, PSMA3	1	0.984597	99.9982
GOTERM_BP_FAT	GO:0030029~actin filament-based process	7	0.167496	SHROOM3, EPB41, BCL2, ADRA2A, PDLIM3, ANTXR1, LPIN1	1	0.788369	95.5184									GOTERM_BP_FAT	GO:0031396~regulation of protein ubiquitination	3	0.570419	SMAD7, BTRC, PSMA3	1	0.993558	99.9999
GOTERM_MF_FAT	GO:0003779~actin binding	3	0.969401	SHROOM3, EPB41, ANTXR1	1	0.999998	100
GOTERM_MF_FAT	GO:0008092~cytoskeletal protein binding	4	0.992185	SHROOM3, EPB41, PDLIM3, ANTXR1	1	1	100									Annotation Cluster 74	Enrichment Score: 0.372558827989798
																Category	Term	Count	PValue	Genes	Bonferroni	Benjamini	FDR
Annotation Cluster 64	Enrichment Score: 0.47192018349046544															GOTERM_BP_FAT	GO:0007600~sensory perception	9	0.233448	CDKN1B, LRAT, TRPM8, GRIN1, GNAS, IMPDH1, SIX6, GJA3, KCNIP3	1	0.930253	98.9158
Category	Term	Count	PValue	Genes	Bonferroni	Benjamini	FDR									GOTERM_BP_FAT	GO:0050953~sensory perception of light stimulus	4	0.571566	LRAT, IMPDH1, SIX6, GJA3	1	0.993555	99.9999
SP_PIR_KEYWORDS	LIM domain	3	0.28891	PDLIM3, LHX5, TES	1	0.873621	98.8786									GOTERM_BP_FAT	GO:0007601~visual perception	4	0.571566	LRAT, IMPDH1, SIX6, GJA3	1	0.993555	99.9999
INTERPRO	IPR001781:Zinc finger, LIM-type	3	0.320779	PDLIM3, LHX5, TES	1	0.999429	99.6202
SMART	SM00132:LIM	3	0.414258	PDLIM3, LHX5, TES	1	0.992481	99.7994									Annotation Cluster 75	Enrichment Score: 0.371875343205713
																Category	Term	Count	PValue	Genes	Bonferroni	Benjamini	FDR
Annotation Cluster 65	Enrichment Score: 0.457536936108903															GOTERM_BP_FAT	GO:0051259~protein oligomerization	6	0.168586	KCND2, TRPM8, BLM, KCNA2, MALT1, INSR	1	0.89209	95.6804
Category	Term	Count	PValue	Genes	Bonferroni	Benjamini	FDR									GOTERM_BP_FAT	GO:0043933~macromolecular complex subunit organization	14	0.435324	KCND2, RSF1, TRPM8, BLM, HIST1H1C, KCNA2, TAF7, CENPF, MALT1, GFM2, CTTNBP2, AGTR1, GHSR, INSR	1	0.980517	99.994
GOTERM_BP_FAT	GO:0051789~response to protein stimulus	4	0.231575	CCND1, BCL2, ITGA2, FAS	1	0.861244	98.846									GOTERM_BP_FAT	GO:0006461~protein complex assembly	10	0.515976	CTTNBP2, KCND2, RSF1, TRPM8, BLM, KCNA2, TAF7, CENPF, MALT1, INSR	1	0.988818	99.9996
GOTERM_BP_FAT	GO:0051384~response to glucocorticoid stimulus	3	0.27272	CCND1, BCL2, FAS	1	0.895909	99.5456									GOTERM_BP_FAT	GO:0070271~protein complex biogenesis	10	0.515976	CTTNBP2, KCND2, RSF1, TRPM8, BLM, KCNA2, TAF7, CENPF, MALT1, INSR	1	0.988818	99.9996
GOTERM_BP_FAT	GO:0031960~response to corticosteroid stimulus	3	0.30664	CCND1, BCL2, FAS	1	0.91879	99.7977									GOTERM_BP_FAT	GO:0065003~macromolecular complex assembly	11	0.707508	CTTNBP2, KCND2, RSF1, TRPM8, BLM, HIST1H1C, KCNA2, TAF7, CENPF, MALT1, INSR	1	0.99843	100
GOTERM_BP_FAT	GO:0048545~response to steroid hormone stimulus	3	0.763509	CCND1, BCL2, FAS	1	0.998837	100
																Annotation Cluster 76	Enrichment Score: 0.34174651419125224
Annotation Cluster 66	Enrichment Score: 0.4558155248228192															Category	Term	Count	PValue	Genes	Bonferroni	Benjamini	FDR
Category	Term	Count	PValue	Genes	Bonferroni	Benjamini	FDR									GOTERM_BP_FAT	GO:0006366~transcription from RNA polymerase II promoter	6	0.443289	ATOH1, CDX2, TAF7, NFIX, NFIL3, APEX1	1	0.981794	99.9953
SP_PIR_KEYWORDS	zinc-finger	33	0.0900173	GLIS1, RBM4, ZCWPW1, PRDM16, GLI3, ZNF331, MKRN2, ZNF174, ZFP36L1, ZNF804B, ZNF30, ARIH1, MLL5, BCL11A, NR2F6, NR2F2, ING1, INSM1, ZC3HC1, SHPRH, KIAA0182, ZNF544, TRIM41, ZNF684, NR4A3, TRIM24, TANK, MYT1L, BAZ1B, ZBED5, PHF21B, BCL6B, ZNF319	1	0.673607	71.1306									GOTERM_BP_FAT	GO:0032774~RNA biosynthetic process	7	0.460096	ATOH1, RSF1, CDX2, TAF7, NFIX, NFIL3, APEX1	1	0.983319	99.9972
SP_PIR_KEYWORDS	metal-binding	51	0.114896	RBM4, PDLIM3, ZCWPW1, GLI3, MKRN2, MLL5, MAP3K5, MAP3K8, NR2F6, NR2F2, ELP3, ZC3HC1, KIAA0182, ZNF544, TRIM41, ZNF684, PPP1CC, TANK, MYT1L, ATP2C2, BAZ1B, ADAM12, GLIS1, PPM1B, PRDM16, ACAT1, ZNF331, ZNF174, ZFP36L1, ZNF30, ZNF804B, ARIH1, BCL11A, LHX5, NENF, APEX1, ING1, TES, INSM1, SHPRH, MAT2A, TRIM24, NR4A3, NOTCH1, ZBED5, BCL6B, PHF21B, ANTXR1, ZNF319, CYB5D1, ATP7B	1	0.722388	79.961									GOTERM_BP_FAT	GO:0006351~transcription, DNA-dependent	7	0.462621	ATOH1, RSF1, CDX2, TAF7, NFIX, NFIL3, APEX1	1	0.983587	99.9974
SP_PIR_KEYWORDS	zinc	38	0.171483	RBM4, GLIS1, PDLIM3, ZCWPW1, PRDM16, GLI3, ZNF331, MKRN2, ZNF174, ZFP36L1, ZNF804B, ZNF30, ARIH1, MLL5, BCL11A, NR2F6, LHX5, NR2F2, ING1, TES, INSM1, ZC3HC1, SHPRH, KIAA0182, ZNF544, TRIM41, ZNF684, NR4A3, TRIM24, PPP1CC, TANK, MYT1L, BAZ1B, ZBED5, PHF21B, BCL6B, ZNF319, ADAM12	1	0.809223	91.6059
GOTERM_MF_FAT	GO:0008270~zinc ion binding	40	0.408215	UQCRC1, RBM4, GLIS1, PDLIM3, ZCWPW1, PRDM16, GLI3, ZNF331, MKRN2, ZNF174, ZFP36L1, IARS, ZNF30, ZNF804B, ARIH1, MLL5, BCL11A, NR2F6, LHX5, NR2F2, ING1, TES, INSM1, ZC3HC1, SHPRH, KIAA0182, ZNF544, TRIM41, ZNF684, NR4A3, TRIM24, TANK, MYT1L, BAZ1B, ZBED5, PHF21B, BCL6B, ZNF319, ADAM12, ATP7B	1	0.993282	99.932									Annotation Cluster 77	Enrichment Score: 0.3382007601882149
GOTERM_MF_FAT	GO:0046914~transition metal ion binding	46	0.506284	UQCRC1, RBM4, GLIS1, PDLIM3, ZCWPW1, PPM1B, PRDM16, GLI3, ZNF331, ZNF174, MKRN2, ZFP36L1, IARS, ZNF30, ZNF804B, ARIH1, MLL5, BCL11A, NR2F6, LHX5, NENF, NR2F2, ING1, TES, INSM1, ELP3, ZC3HC1, SHPRH, KIAA0182, MAT2A, ZNF544, TRIM41, ZNF684, NR4A3, TRIM24, PPP1CC, TANK, MYT1L, BAZ1B, ZBED5, PHF21B, BCL6B, ZNF319, ADAM12, CYB5D1, ATP7B	1	0.995991	99.9945									Category	Term	Count	PValue	Genes	Bonferroni	Benjamini	FDR
GOTERM_MF_FAT	GO:0046872~metal ion binding	61	0.828312	UQCRC1, RBM4, PDLIM3, ZCWPW1, GLI3, MKRN2, MAP3K5, MLL5, MAP3K8, NR2F6, NR2F2, ELP3, ZC3HC1, KIAA0182, ZNF544, TRIM41, ZNF684, PPP1CC, TANK, MYT1L, ATP2C2, BAZ1B, ADAM12, ITGA2B, GLIS1, CETN3, PPM1B, PRDM16, ACAT1, ZNF331, ZNF174, ZFP36L1, ZNF30, IARS, ZNF804B, TTYH3, ARIH1, BCL11A, LHX5, PCSK9, HSPA5, NENF, APEX1, ING1, TES, INSM1, SHPRH, MAT2A, ITGA2, TRIM24, NR4A3, NOTCH1, ZBED5, PHF21B, BCL6B…	1	0.999726	100									INTERPRO	IPR011511:Variant SH3	3	0.233399	SH3RF2, VAV2, MCF2L	1	0.999946	97.8646
GOTERM_MF_FAT	GO:0043169~cation binding	61	0.847951	UQCRC1, RBM4, PDLIM3, ZCWPW1, GLI3, MKRN2, MAP3K5, MLL5, MAP3K8, NR2F6, NR2F2, ELP3, ZC3HC1, KIAA0182, ZNF544, TRIM41, ZNF684, PPP1CC, TANK, MYT1L, ATP2C2, BAZ1B, ADAM12, ITGA2B, GLIS1, CETN3, PPM1B, PRDM16, ACAT1, ZNF331, ZNF174, ZFP36L1, ZNF30, IARS, ZNF804B, TTYH3, ARIH1, BCL11A, LHX5, PCSK9, HSPA5, NENF, APEX1, ING1, TES, INSM1, SHPRH, MAT2A, ITGA2, TRIM24, NR4A3, NOTCH1, ZBED5, PHF21B, BCL6B…	1	0.999768	100									INTERPRO	IPR001452:Src homology-3 domain	5	0.388011	FNBP1, SH3RF2, VAV2, MCF2L, SPTAN1	1	0.999984	99.918
GOTERM_MF_FAT	GO:0043167~ion binding	61	0.876545	UQCRC1, RBM4, PDLIM3, ZCWPW1, GLI3, MKRN2, MAP3K5, MLL5, MAP3K8, NR2F6, NR2F2, ELP3, ZC3HC1, KIAA0182, ZNF544, TRIM41, ZNF684, PPP1CC, TANK, MYT1L, ATP2C2, BAZ1B, ADAM12, ITGA2B, GLIS1, CETN3, PPM1B, PRDM16, ACAT1, ZNF331, ZNF174, ZFP36L1, ZNF30, IARS, ZNF804B, TTYH3, ARIH1, BCL11A, LHX5, PCSK9, HSPA5, NENF, APEX1, ING1, TES, INSM1, SHPRH, MAT2A, ITGA2, TRIM24, NR4A3, NOTCH1, ZBED5, PHF21B, BCL6B…	1	0.999834	100									SMART	SM00326:SH3	5	0.53507	FNBP1, SH3RF2, VAV2, MCF2L, SPTAN1	1	0.999945	99.9863
																SP_PIR_KEYWORDS	sh3 domain	4	0.578501	FNBP1, SH3RF2, VAV2, SPTAN1	1	0.993827	99.9991
Annotation Cluster 67	Enrichment Score: 0.4264516298970265															UP_SEQ_FEATURE	domain:SH3	3	0.726672	FNBP1, MCF2L, SPTAN1	1	1	100
Category	Term	Count	PValue	Genes	Bonferroni	Benjamini	FDR
GOTERM_MF_FAT	GO:0005096~GTPase activator activity	7	0.16119	ARHGAP21, RGS12, RGS2, TBC1D14, SIPA1L3, TBC1D7, ARHGAP12	1	0.956016	91.3148									Annotation Cluster 78	Enrichment Score: 0.33084456224671255
GOTERM_MF_FAT	GO:0008047~enzyme activator activity	9	0.18896	ARHGAP21, MAP3K5, RGS12, RGS2, TBC1D14, SIPA1L3, TBC1D7, ARHGAP12, FN1	1	0.951828	94.5611									Category	Term	Count	PValue	Genes	Bonferroni	Benjamini	FDR
SP_PIR_KEYWORDS	GTPase activation	5	0.217625	ARHGAP21, TBC1D14, SIPA1L3, TBC1D7, ARHGAP12	1	0.820566	96.0536									GOTERM_CC_FAT	GO:0005912~adherens junction	4	0.3891	PTPRK, CTTNBP2, SMAD7, SPTAN1	1	0.972179	99.8611
GOTERM_MF_FAT	GO:0030695~GTPase regulator activity	10	0.256214	ARHGAP21, RGS12, RGS2, RASGRF1, TBC1D14, DOCK9, SIPA1L3, TBC1D7, SGEF, ARHGAP12	1	0.978888	98.3674									GOTERM_CC_FAT	GO:0070161~anchoring junction	4	0.442444	PTPRK, CTTNBP2, SMAD7, SPTAN1	1	0.979113	99.959
GOTERM_MF_FAT	GO:0060589~nucleoside-triphosphatase regulator activity	10	0.277073	ARHGAP21, RGS12, RGS2, RASGRF1, TBC1D14, DOCK9, SIPA1L3, TBC1D7, SGEF, ARHGAP12	1	0.978596	98.9006									GOTERM_CC_FAT	GO:0005911~cell-cell junction	4	0.477171	PTPRK, SMAD7, SPTAN1, GJA3	1	0.982156	99.9826
GOTERM_BP_FAT	GO:0032318~regulation of Ras GTPase activity	3	0.497727	RASGRF1, TBC1D14, TBC1D7	1	0.97876	99.9991									GOTERM_CC_FAT	GO:0030054~cell junction	8	0.578134	ARHGAP21, PTPRK, CTTNBP2, SMAD7, GRIN1, LIM2, SPTAN1, GJA3	1	0.987212	99.999
GOTERM_BP_FAT	GO:0051336~regulation of hydrolase activity	6	0.564274	RASGRF1, TBC1D14, ITGA2, TBC1D7, HSPA5, MYC	1	0.987342	99.9999
GOTERM_BP_FAT	GO:0043087~regulation of GTPase activity	3	0.574979	RASGRF1, TBC1D14, TBC1D7	1	0.988289	99.9999									Annotation Cluster 79	Enrichment Score: 0.3270624298925739
GOTERM_BP_FAT	GO:0051056~regulation of small GTPase mediated signal transduction	5	0.57763	RASGRF1, TBC1D14, SIPA1L3, TBC1D7, SGEF	1	0.988513	100									Category	Term	Count	PValue	Genes	Bonferroni	Benjamini	FDR
GOTERM_BP_FAT	GO:0046578~regulation of Ras protein signal transduction	4	0.657453	RASGRF1, TBC1D14, TBC1D7, SGEF	1	0.994947	100									GOTERM_BP_FAT	GO:0006694~steroid biosynthetic process	3	0.351071	PRKAG2, CRH, LHB	1	0.964223	99.9363
GOTERM_MF_FAT	GO:0005083~small GTPase regulator activity	5	0.705943	RASGRF1, TBC1D14, DOCK9, TBC1D7, SGEF	1	0.998578	100									GOTERM_BP_FAT	GO:0008202~steroid metabolic process	4	0.51538	OSBP2, PRKAG2, CRH, LHB	1	0.988903	99.9996
																GOTERM_BP_FAT	GO:0008610~lipid biosynthetic process	6	0.577152	PRKAG2, CRH, PIGC, ELOVL6, AGPAT3, LHB	1	0.993737	100
Annotation Cluster 68	Enrichment Score: 0.3902820798658316
Category	Term	Count	PValue	Genes	Bonferroni	Benjamini	FDR									Annotation Cluster 80	Enrichment Score: 0.32165664851610365
KEGG_PATHWAY	hsa05412:Arrhythmogenic right ventricular cardiomyopathy (ARVC)	3	0.384527	ITGA2, CACNA1D, ITGA2B	1	0.907699	99.5769									Category	Term	Count	PValue	Genes	Bonferroni	Benjamini	FDR
KEGG_PATHWAY	hsa05410:Hypertrophic cardiomyopathy (HCM)	3	0.398667	ITGA2, CACNA1D, ITGA2B	1	0.908209	99.6743									GOTERM_CC_FAT	GO:0044431~Golgi apparatus part	7	0.283125	CLTB, LIMK2, RAB14, GNAS, CYP2E1, PCSK5, COPE	1	0.97106	98.8244
KEGG_PATHWAY	hsa05414:Dilated cardiomyopathy	3	0.440165	ITGA2, CACNA1D, ITGA2B	1	0.910158	99.8544									GOTERM_CC_FAT	GO:0000139~Golgi membrane	4	0.548048	CLTB, GNAS, CYP2E1, COPE	1	0.986472	99.9975
																GOTERM_CC_FAT	GO:0012505~endomembrane system	11	0.698608	CTTNBP2, CLTB, SEC11C, LEMD2, RAB14, CENPF, PIGC, GNAS, ELOVL6, CYP2E1, COPE	1	0.993015	100
Annotation Cluster 69	Enrichment Score: 0.3883917176351389
Category	Term	Count	PValue	Genes	Bonferroni	Benjamini	FDR									Annotation Cluster 81	Enrichment Score: 0.3166413210219295
GOTERM_BP_FAT	GO:0048610~reproductive cellular process	5	0.249137	CCND1, BCL2, AFF4, FOXC1, CDC25B	1	0.875847	99.2199									Category	Term	Count	PValue	Genes	Bonferroni	Benjamini	FDR
GOTERM_BP_FAT	GO:0048609~reproductive process in a multicellular organism	10	0.293706	SLC22A16, NOTCH1, NPAS3, RGS2, BCL2, AFF4, FOXC1, ATP7B, CDC25B, DAZAP1	1	0.910379	99.7233									SP_PIR_KEYWORDS	extracellular matrix	6	0.172408	WNT5A, LAMA2, MMP9, CRTAP, ITGB5, WNT11	1	0.950651	92.2013
GOTERM_BP_FAT	GO:0032504~multicellular organism reproduction	10	0.293706	SLC22A16, NOTCH1, NPAS3, RGS2, BCL2, AFF4, FOXC1, ATP7B, CDC25B, DAZAP1	1	0.910379	99.7233									KEGG_PATHWAY	hsa05200:Pathways in cancer	8	0.302786	WNT5A, LAMA2, FGF8, CDKN1B, MMP9, JUN, PAX8, WNT11	1	0.964716	98.2012
GOTERM_BP_FAT	GO:0007276~gamete generation	8	0.368045	SLC22A16, NOTCH1, RGS2, BCL2, AFF4, FOXC1, CDC25B, DAZAP1	1	0.948289	99.9579									GOTERM_CC_FAT	GO:0005578~proteinaceous extracellular matrix	6	0.344603	WNT5A, LAMA2, TF, MMP9, CRTAP, WNT11	1	0.972605	99.6448
GOTERM_BP_FAT	GO:0019953~sexual reproduction	8	0.472962	SLC22A16, NOTCH1, RGS2, BCL2, AFF4, FOXC1, CDC25B, DAZAP1	1	0.974978	99.9981									GOTERM_CC_FAT	GO:0031012~extracellular matrix	6	0.417357	WNT5A, LAMA2, TF, MMP9, CRTAP, WNT11	1	0.978349	99.9262
GOTERM_BP_FAT	GO:0007281~germ cell development	3	0.485986	BCL2, AFF4, CDC25B	1	0.977514	99.9987									SP_PIR_KEYWORDS	Secreted	15	0.772432	WNT5A, TF, FGF8, C21ORF29, MMP9, CRTAP, F7, FAM19A5, LAMA2, TSLP, CRH, WNT11, PCSK5, LHB, VWA2	1	0.99812	100
GOTERM_BP_FAT	GO:0048232~male gamete generation	5	0.655581	SLC22A16, NOTCH1, RGS2, AFF4, DAZAP1	1	0.99496	100									GOTERM_CC_FAT	GO:0005615~extracellular space	6	0.785165	WNT5A, TF, TSLP, CDH13, MMP9, PCSK5	1	0.996976	100
GOTERM_BP_FAT	GO:0007283~spermatogenesis	5	0.655581	SLC22A16, NOTCH1, RGS2, AFF4, DAZAP1	1	0.99496	100									GOTERM_CC_FAT	GO:0044421~extracellular region part	9	0.7885	WNT5A, LAMA2, TF, TSLP, CDH13, MMP9, CRTAP, WNT11, PCSK5	1	0.996933	100
																GOTERM_CC_FAT	GO:0005576~extracellular region	17	0.816069	WNT5A, TF, FGF8, C21ORF29, MMP9, CRTAP, F7, FAM19A5, LAMA2, CDH13, TSLP, CRH, GNAS, WNT11, PCSK5, LHB, VWA2	1	0.998029	100
Annotation Cluster 70	Enrichment Score: 0.3562226267671983
Category	Term	Count	PValue	Genes	Bonferroni	Benjamini	FDR									Annotation Cluster 82	Enrichment Score: 0.2993649711911656
GOTERM_BP_FAT	GO:0007155~cell adhesion	12	0.394413	ICAM1, BCL2, CTNND2, COL6A1, ROR2, ITGA2, ANTXR1, ADAM12, CD2AP, APBA1, ITGA2B, FN1	1	0.958845	99.9796									Category	Term	Count	PValue	Genes	Bonferroni	Benjamini	FDR
GOTERM_BP_FAT	GO:0022610~biological adhesion	12	0.394413	ICAM1, BCL2, CTNND2, COL6A1, ROR2, ITGA2, ANTXR1, ADAM12, CD2AP, APBA1, ITGA2B, FN1	1	0.958845	99.9796									GOTERM_BP_FAT	GO:0000226~microtubule cytoskeleton organization	5	0.281581	TUBGCP3, CTTNBP2, TEKT3, MAP7, PCM1	1	0.943464	99.6404
GOTERM_BP_FAT	GO:0016337~cell-cell adhesion	5	0.54882	ICAM1, BCL2, CTNND2, ROR2, CD2AP	1	0.986094	99.9999									GOTERM_BP_FAT	GO:0007010~cytoskeleton organization	10	0.325979	TUBGCP3, ABLIM2, CTTNBP2, FMNL3, ANK1, TEKT3, MAP7, GHSR, PCM1, TPM1	1	0.956297	99.8786
																GOTERM_CC_FAT	GO:0015630~microtubule cytoskeleton	10	0.464714	TUBGCP3, CEP350, PPP2CA, CAMSAP1, TEKT3, CENPF, MAP7, PCM1, APEX1, IFT88	1	0.982554	99.9762
Annotation Cluster 71	Enrichment Score: 0.3515534350721773															GOTERM_BP_FAT	GO:0007017~microtubule-based process	5	0.671178	TUBGCP3, CTTNBP2, TEKT3, MAP7, PCM1	1	0.997683	100
Category	Term	Count	PValue	Genes	Bonferroni	Benjamini	FDR									SP_PIR_KEYWORDS	microtubule	4	0.715953	TUBGCP3, CAMSAP1, TEKT3, MAP7	1	0.996437	100
SP_PIR_KEYWORDS	transmembrane protein	11	0.20468	TSPO, PTPRZ1, ADRA2A, ROR2, ITGA2, CHRNB2, FAS, CACNA1D, ATP7B, ITGA2B, GJB2	1	0.807039	95.1015									GOTERM_CC_FAT	GO:0005874~microtubule	4	0.780026	TUBGCP3, CAMSAP1, TEKT3, MAP7	1	0.996927	100
GOTERM_CC_FAT	GO:0044459~plasma membrane part	31	0.320456	SHROOM3, VAPA, TOLLIP, RP2, CTNND2, GABBR2, ARHGAP21, RAB28, ADRA2A, PCSK9, FAS, TES, FN1, RAP2B, IRS4, ICAM1, PTPRZ1, ITGA2, GJB2, CBLN4, LAYN, KCNF1, ROR2, MAP7, CHRNB2, KCTD15, ANTXR1, CACNA1D, HS3ST3B1, ATP7B, ITGA2B	1	0.937045	99.3814
GOTERM_CC_FAT	GO:0005887~integral to plasma membrane	13	0.759051	ICAM1, TOLLIP, PTPRZ1, ITGA2, GABBR2, ADRA2A, ROR2, KCNF1, KCTD15, CHRNB2, HS3ST3B1, ITGA2B, ATP7B	1	0.996629	100									Annotation Cluster 83	Enrichment Score: 0.288310528496537
GOTERM_CC_FAT	GO:0031226~intrinsic to plasma membrane	13	0.788261	ICAM1, TOLLIP, PTPRZ1, ITGA2, GABBR2, ADRA2A, ROR2, KCNF1, KCTD15, CHRNB2, HS3ST3B1, ITGA2B, ATP7B	1	0.996925	100									Category	Term	Count	PValue	Genes	Bonferroni	Benjamini	FDR
																UP_SEQ_FEATURE	domain:Cadherin 5	3	0.401793	CDH13, PCDHGA8, PCDHGA2	1	1	99.9644
Annotation Cluster 72	Enrichment Score: 0.34555359181659734															UP_SEQ_FEATURE	domain:Cadherin 3	3	0.419804	CDH13, PCDHGA8, PCDHGA2	1	0.999999	99.9778
Category	Term	Count	PValue	Genes	Bonferroni	Benjamini	FDR									UP_SEQ_FEATURE	domain:Cadherin 4	3	0.419804	CDH13, PCDHGA8, PCDHGA2	1	0.999999	99.9778
INTERPRO	IPR000315:Zinc finger, B-box	3	0.252902	KIAA0182, TRIM41, TRIM24	1	0.998277	98.5018									UP_SEQ_FEATURE	domain:Cadherin 1	3	0.431657	CDH13, PCDHGA8, PCDHGA2	1	0.999999	99.9839
INTERPRO	IPR001841:Zinc finger, RING-type	7	0.298346	ARIH1, SHPRH, KIAA0182, BAZ1B, TRIM41, TRIM24, MKRN2	1	0.999187	99.3935									UP_SEQ_FEATURE	domain:Cadherin 2	3	0.431657	CDH13, PCDHGA8, PCDHGA2	1	0.999999	99.9839
SMART	SM00336:BBOX	3	0.333754	KIAA0182, TRIM41, TRIM24	1	0.986855	99.105									INTERPRO	IPR002126:Cadherin	3	0.465779	CDH13, PCDHGA8, PCDHGA2	1	0.999994	99.9885
INTERPRO	IPR017907:Zinc finger, RING-type, conserved site	6	0.418638	ARIH1, SHPRH, KIAA0182, TRIM41, TRIM24, MKRN2	1	0.999667	99.9596									SMART	SM00112:CA	3	0.570761	CDH13, PCDHGA8, PCDHGA2	1	0.999879	99.9946
SMART	SM00184:RING	7	0.479333	ARIH1, SHPRH, KIAA0182, BAZ1B, TRIM41, TRIM24, MKRN2	1	0.994599	99.9489									GOTERM_BP_FAT	GO:0007156~homophilic cell adhesion	3	0.603216	CDH13, PCDHGA8, PCDHGA2	1	0.995228	100
UP_SEQ_FEATURE	zinc finger region:RING-type	4	0.567249	SHPRH, TRIM41, TRIM24, MKRN2	1	1	99.9998									SP_PIR_KEYWORDS	cell adhesion	6	0.669106	LAMA2, IGSF11, CDH13, PCDHGA8, ITGB5, PCDHGA2	1	0.994748	100
INTERPRO	IPR018957:Zinc finger, C3HC4 RING-type	4	0.672311	KIAA0182, TRIM41, TRIM24, MKRN2	1	0.999996	100									GOTERM_BP_FAT	GO:0016337~cell-cell adhesion	3	0.924528	CDH13, PCDHGA8, PCDHGA2	1	0.999993	100
SP_PIR_KEYWORDS	ubl conjugation pathway	6	0.892591	ARIH1, SHPRH, ZC3HC1, WDR5B, TRIM41, MKRN2	1	0.998244	100
																Annotation Cluster 84	Enrichment Score: 0.286930847140202
Annotation Cluster 73	Enrichment Score: 0.33520348107875875															Category	Term	Count	PValue	Genes	Bonferroni	Benjamini	FDR
Category	Term	Count	PValue	Genes	Bonferroni	Benjamini	FDR									UP_SEQ_FEATURE	repeat:WD 7	5	0.225369	WDR86, BTRC, WDR27, TLE3, MAPKBP1	1	1	98.0673
GOTERM_BP_FAT	GO:0014070~response to organic cyclic substance	5	0.135309	CCND1, CDKN2B, BCL2, ITGA2, CHRNB2	1	0.747723	91.4788									UP_SEQ_FEATURE	repeat:WD 8	3	0.244484	WDR86, WDR27, MAPKBP1	1	1	98.6864
GOTERM_BP_FAT	GO:0009628~response to abiotic stimulus	7	0.427434	CCND1, MAT2A, BCL2, NR2F6, ITGA2, CHRNB2, MYC	1	0.96583	99.9921									UP_SEQ_FEATURE	repeat:WD 6	5	0.374027	WDR86, BTRC, WDR27, TLE3, MAPKBP1	1	1	99.9282
GOTERM_BP_FAT	GO:0001666~response to hypoxia	3	0.638684	BCL2, ITGA2, CHRNB2	1	0.993878	100									INTERPRO	IPR015943:WD40/YVTN repeat-like	7	0.385549	SEMA5A, SEMA6B, WDR86, BTRC, WDR27, TLE3, MAPKBP1	1	0.99999	99.9131
GOTERM_BP_FAT	GO:0070482~response to oxygen levels	3	0.665472	BCL2, ITGA2, CHRNB2	1	0.995436	100									UP_SEQ_FEATURE	repeat:WD 5	5	0.516295	WDR86, BTRC, WDR27, TLE3, MAPKBP1	1	1	99.9987
GOTERM_BP_FAT	GO:0051240~positive regulation of multicellular organismal process	3	0.857772	BCL2, ITGA2, CHRNB2	1	0.999818	100									INTERPRO	IPR019782:WD40 repeat 2	5	0.528046	WDR86, BTRC, WDR27, TLE3, MAPKBP1	1	0.999995	99.9981
																INTERPRO	IPR017986:WD40 repeat, region	5	0.571956	WDR86, BTRC, WDR27, TLE3, MAPKBP1	1	0.999983	99.9995
Annotation Cluster 74	Enrichment Score: 0.31208823175703543															UP_SEQ_FEATURE	repeat:WD 4	5	0.575453	WDR86, BTRC, WDR27, TLE3, MAPKBP1	1	1	99.9998
Category	Term	Count	PValue	Genes	Bonferroni	Benjamini	FDR									INTERPRO	IPR019781:WD40 repeat, subgroup	5	0.582558	WDR86, BTRC, WDR27, TLE3, MAPKBP1	1	0.999984	99.9997
SP_PIR_KEYWORDS	sh3 domain	5	0.35117	BZRAP1, CD2AP, SGEF, ARHGAP12, MAP3K11	1	0.910195	99.6645									UP_SEQ_FEATURE	repeat:WD 3	5	0.621352	WDR86, BTRC, WDR27, TLE3, MAPKBP1	1	1	100
INTERPRO	IPR001452:Src homology-3 domain	5	0.398484	BZRAP1, CD2AP, SGEF, ARHGAP12, MAP3K11	1	0.999656	99.934									UP_SEQ_FEATURE	repeat:WD 1	5	0.646145	WDR86, BTRC, WDR27, TLE3, MAPKBP1	1	1	100
SMART	SM00326:SH3	5	0.555111	BZRAP1, CD2AP, SGEF, ARHGAP12, MAP3K11	1	0.997753	99.9918									UP_SEQ_FEATURE	repeat:WD 2	5	0.646145	WDR86, BTRC, WDR27, TLE3, MAPKBP1	1	1	100
UP_SEQ_FEATURE	domain:SH3	3	0.726672	SGEF, ARHGAP12, MAP3K11	1	1	100									SP_PIR_KEYWORDS	wd repeat	5	0.651474	WDR86, BTRC, WDR27, TLE3, MAPKBP1	1	0.995109	99.9999
																INTERPRO	IPR001680:WD40 repeat	5	0.661696	WDR86, BTRC, WDR27, TLE3, MAPKBP1	1	0.999992	100
Annotation Cluster 75	Enrichment Score: 0.30663932290380647															INTERPRO	IPR019775:WD40 repeat, conserved site	5	0.688627	WDR86, BTRC, WDR27, TLE3, MAPKBP1	1	0.999989	100
Category	Term	Count	PValue	Genes	Bonferroni	Benjamini	FDR									SMART	SM00320:WD40	5	0.801978	WDR86, BTRC, WDR27, TLE3, MAPKBP1	1	0.999948	100
GOTERM_BP_FAT	GO:0043279~response to alkaloid	4	0.0629341	UQCRC1, BCL2, CHRNB2, MYC	1	0.574599	66.7478
GOTERM_BP_FAT	GO:0051899~membrane depolarization	3	0.158962	BCL2, CHRNB2, GCLM	1	0.780759	94.6732									Annotation Cluster 85	Enrichment Score: 0.27831194765401773
GOTERM_BP_FAT	GO:0009314~response to radiation	6	0.180172	CCND1, MAT2A, BCL2, NR2F6, CHRNB2, MYC	1	0.805184	96.544									Category	Term	Count	PValue	Genes	Bonferroni	Benjamini	FDR
GOTERM_BP_FAT	GO:0042592~homeostatic process	13	0.401977	IRS2, FOXA1, ITGA2, TRIM24, GCLM, MLL5, BCL2, PCSK9, CHRNB2, FAS, APEX1, MYC, ATP7B	1	0.960652	99.9835									INTERPRO	IPR008957:Fibronectin, type III-like fold	5	0.276236	PTPRK, MYOM2, PTPRG, LRFN5, INSR	1	0.999986	99.0708
GOTERM_BP_FAT	GO:0048878~chemical homeostasis	9	0.420127	IRS2, BCL2, FOXA1, PCSK9, CHRNB2, TRIM24, GCLM, MYC, ATP7B	1	0.96435	99.9902									INTERPRO	IPR003961:Fibronectin, type III	5	0.30444	PTPRK, MYOM2, PTPRG, LRFN5, INSR	1	0.999992	99.4773
GOTERM_BP_FAT	GO:0032844~regulation of homeostatic process	3	0.503534	BCL2, GCLM, MYC	1	0.979849	99.9993									UP_SEQ_FEATURE	domain:Fibronectin type-III 3	3	0.333738	PTPRK, MYOM2, INSR	1	1	99.8117
GOTERM_BP_FAT	GO:0055066~di-, tri-valent inorganic cation homeostasis	4	0.627604	BCL2, TRIM24, MYC, ATP7B	1	0.993077	100									SMART	SM00060:FN3	5	0.440391	PTPRK, MYOM2, PTPRG, LRFN5, INSR	1	0.99974	99.8819
GOTERM_BP_FAT	GO:0042391~regulation of membrane potential	3	0.652282	BCL2, CHRNB2, GCLM	1	0.994794	100									INTERPRO	IPR003598:Immunoglobulin subtype 2	4	0.476454	IGSF11, MYOM2, MALT1, LRFN5	1	0.99999	99.9914
GOTERM_BP_FAT	GO:0050801~ion homeostasis	6	0.692164	BCL2, CHRNB2, TRIM24, GCLM, MYC, ATP7B	1	0.996768	100									UP_SEQ_FEATURE	domain:Fibronectin type-III 2	3	0.537224	PTPRK, MYOM2, INSR	1	1	99.9993
GOTERM_BP_FAT	GO:0055074~calcium ion homeostasis	3	0.714249	BCL2, TRIM24, ATP7B	1	0.997635	100									UP_SEQ_FEATURE	domain:Fibronectin type-III 1	3	0.542397	PTPRK, MYOM2, INSR	1	1	99.9994
GOTERM_BP_FAT	GO:0055080~cation homeostasis	4	0.739512	BCL2, TRIM24, MYC, ATP7B	1	0.998377	100									SMART	SM00408:IGc2	4	0.609043	IGSF11, MYOM2, MALT1, LRFN5	1	0.999904	99.9982
GOTERM_BP_FAT	GO:0055065~metal ion homeostasis	3	0.750236	BCL2, TRIM24, ATP7B	1	0.998574	100									INTERPRO	IPR013098:Immunoglobulin I-set	3	0.620553	PTPRK, MYOM2, LRFN5	1	0.999991	99.9999
GOTERM_BP_FAT	GO:0006873~cellular ion homeostasis	5	0.787566	BCL2, CHRNB2, GCLM, MYC, ATP7B	1	0.999241	100									INTERPRO	IPR013151:Immunoglobulin	3	0.625228	IGSF11, MYOM2, MALT1	1	0.999988	99.9999
GOTERM_BP_FAT	GO:0055082~cellular chemical homeostasis	5	0.798454	BCL2, CHRNB2, GCLM, MYC, ATP7B	1	0.999393	100									INTERPRO	IPR003599:Immunoglobulin subtype	4	0.635525	PTPRK, IGSF11, MYOM2, MALT1	1	0.999985	100
GOTERM_BP_FAT	GO:0030005~cellular di-, tri-valent inorganic cation homeostasis	3	0.807986	BCL2, MYC, ATP7B	1	0.999485	100									SP_PIR_KEYWORDS	Immunoglobulin domain	5	0.669158	PTPRK, IGSF11, MYOM2, MALT1, LRFN5	1	0.994331	100
GOTERM_BP_FAT	GO:0019725~cellular homeostasis	6	0.818605	BCL2, CHRNB2, APEX1, GCLM, MYC, ATP7B	1	0.999562	100									INTERPRO	IPR007110:Immunoglobulin-like	5	0.682775	PTPRK, IGSF11, MYOM2, MALT1, LRFN5	1	0.999991	100
GOTERM_BP_FAT	GO:0030003~cellular cation homeostasis	3	0.855695	BCL2, MYC, ATP7B	1	0.99981	100									INTERPRO	IPR013783:Immunoglobulin-like fold	5	0.745481	PTPRK, IGSF11, MYOM2, MALT1, LRFN5	1	0.999995	100
																SMART	SM00409:IG	4	0.762008	PTPRK, IGSF11, MYOM2, MALT1	1	0.999963	100
Annotation Cluster 76	Enrichment Score: 0.30450797367574145
Category	Term	Count	PValue	Genes	Bonferroni	Benjamini	FDR									Annotation Cluster 86	Enrichment Score: 0.2687281872859925
GOTERM_BP_FAT	GO:0010647~positive regulation of cell communication	7	0.322018	CFLAR, CDKN2B, VAPA, SOX4, ITGA2, CHRNB2, NENF	1	0.927462	99.8616									Category	Term	Count	PValue	Genes	Bonferroni	Benjamini	FDR
GOTERM_BP_FAT	GO:0010627~regulation of protein kinase cascade	5	0.473992	CFLAR, MAP3K5, VAPA, NENF, MAP3K11	1	0.974959	99.9981									GOTERM_BP_FAT	GO:0051276~chromosome organization	10	0.477361	CDYL, RSF1, BLM, HIST1H1C, L3MBTL, CENPF, SUPT7L, CARM1, BCOR, SMARCA2	1	0.984822	99.9984
GOTERM_BP_FAT	GO:0009967~positive regulation of signal transduction	5	0.588344	CFLAR, CDKN2B, VAPA, SOX4, NENF	1	0.989532	100									GOTERM_BP_FAT	GO:0006325~chromatin organization	8	0.486152	CDYL, RSF1, HIST1H1C, L3MBTL, SUPT7L, CARM1, BCOR, SMARCA2	1	0.985771	99.9988
GOTERM_BP_FAT	GO:0010740~positive regulation of protein kinase cascade	3	0.674041	CFLAR, VAPA, NENF	1	0.995858	100									GOTERM_BP_FAT	GO:0016568~chromatin modification	6	0.556172	RSF1, L3MBTL, SUPT7L, CARM1, BCOR, SMARCA2	1	0.992658	99.9999
																SP_PIR_KEYWORDS	chromatin regulator	4	0.652016	RSF1, L3MBTL, CARM1, BCOR	1	0.994726	99.9999
Annotation Cluster 77	Enrichment Score: 0.2972348518395126
Category	Term	Count	PValue	Genes	Bonferroni	Benjamini	FDR									Annotation Cluster 87	Enrichment Score: 0.2668206053980012
GOTERM_BP_FAT	GO:0001558~regulation of cell growth	5	0.366104	CDKN1B, BCL2, FGFRL1, HTRA4, ING1	1	0.947822	99.9557									Category	Term	Count	PValue	Genes	Bonferroni	Benjamini	FDR
GOTERM_BP_FAT	GO:0030308~negative regulation of cell growth	3	0.418528	CDKN1B, BCL2, ING1	1	0.964161	99.9897									UP_SEQ_FEATURE	domain:PH	6	0.322222	ARHGAP21, OSBP2, SNTG1, VAV2, MCF2L, PHLDA2	1	1	99.7547
GOTERM_BP_FAT	GO:0040008~regulation of growth	7	0.451059	CDKN1B, TBX5, BCL2, FGFRL1, FOXC1, HTRA4, ING1	1	0.971168	99.9961									INTERPRO	IPR001849:Pleckstrin homology	6	0.471181	ARHGAP21, OSBP2, SNTG1, VAV2, MCF2L, PHLDA2	1	0.999992	99.9901
GOTERM_BP_FAT	GO:0045792~negative regulation of cell size	3	0.455907	CDKN1B, BCL2, ING1	1	0.971977	99.9967									SMART	SM00233:PH	6	0.64652	ARHGAP21, OSBP2, SNTG1, VAV2, MCF2L, PHLDA2	1	0.999926	99.9994
GOTERM_BP_FAT	GO:0045926~negative regulation of growth	3	0.509297	CDKN1B, BCL2, ING1	1	0.980881	99.9994									INTERPRO	IPR011993:Pleckstrin homology-type	4	0.872555	ARHGAP21, OSBP2, MCF2L, FRMD1	1	1	100
GOTERM_BP_FAT	GO:0008361~regulation of cell size	4	0.646464	CDKN1B, BCL2, CLN8, ING1	1	0.994428	100
GOTERM_BP_FAT	GO:0032535~regulation of cellular component size	4	0.800577	CDKN1B, BCL2, CLN8, ING1	1	0.999411	100									Annotation Cluster 88	Enrichment Score: 0.2642997811623281
																Category	Term	Count	PValue	Genes	Bonferroni	Benjamini	FDR
Annotation Cluster 78	Enrichment Score: 0.2863198790364719															GOTERM_BP_FAT	GO:0006397~mRNA processing	9	0.23625	PAPOLB, PRPF4B, LSM6, ISY1, KHSRP, WBP11, CDC5L, HNRPLL, RNGTT	1	0.925734	98.9813
Category	Term	Count	PValue	Genes	Bonferroni	Benjamini	FDR									GOTERM_BP_FAT	GO:0016071~mRNA metabolic process	10	0.239255	DCPS, PAPOLB, PRPF4B, LSM6, ISY1, KHSRP, WBP11, CDC5L, HNRPLL, RNGTT	1	0.925513	99.0474
GOTERM_MF_FAT	GO:0017016~Ras GTPase binding	3	0.473594	DOCK9, RAP1A, MAP3K11	1	0.99621	99.9866									UP_SEQ_FEATURE	domain:RRM 2	3	0.47773	ELAVL2, DND1, HNRPLL	1	1	99.9956
GOTERM_MF_FAT	GO:0031267~small GTPase binding	3	0.517483	DOCK9, RAP1A, MAP3K11	1	0.996254	99.996									UP_SEQ_FEATURE	domain:RRM 1	3	0.47773	ELAVL2, DND1, HNRPLL	1	1	99.9956
GOTERM_MF_FAT	GO:0051020~GTPase binding	3	0.564596	DOCK9, RAP1A, MAP3K11	1	0.996322	99.999									INTERPRO	IPR012677:Nucleotide-binding, alpha-beta plait	4	0.678226	NOL8, ELAVL2, DND1, HNRPLL	1	0.999992	100
																GOTERM_BP_FAT	GO:0006396~RNA processing	10	0.681586	PAPOLB, PRPF4B, PPP2CA, LSM6, ISY1, KHSRP, WBP11, CDC5L, HNRPLL, RNGTT	1	0.997908	100
Annotation Cluster 79	Enrichment Score: 0.28567851295638663															INTERPRO	IPR000504:RNA recognition motif, RNP-1	4	0.684974	NOL8, ELAVL2, DND1, HNRPLL	1	0.99999	100
Category	Term	Count	PValue	Genes	Bonferroni	Benjamini	FDR									SP_PIR_KEYWORDS	rna-binding	8	0.744849	PAPOLB, LSM6, NOL8, KHSRP, ELAVL2, CDC5L, DND1, HNRPLL	1	0.997176	100
GOTERM_MF_FAT	GO:0042623~ATPase activity, coupled	6	0.471044	ATP2C2, RBBP4, GTF2H4, ABCD4, DYNC1H1, ATP7B	1	0.996515	99.9857									SMART	SM00360:RRM	4	0.804679	NOL8, ELAVL2, DND1, HNRPLL	1	0.999925	100
GOTERM_MF_FAT	GO:0042626~ATPase activity, coupled to transmembrane movement of substances	3	0.48001	ATP2C2, ABCD4, ATP7B	1	0.996146	99.9887									GOTERM_MF_FAT	GO:0003723~RNA binding	9	0.92928	PAPOLB, LSM6, NOL8, KHSRP, ELAVL2, CDC5L, DND1, RPS5, HNRPLL	1	0.999993	100
GOTERM_MF_FAT	GO:0016820~hydrolase activity, acting on acid anhydrides, catalyzing transmembrane movement of substances	3	0.486379	ATP2C2, ABCD4, ATP7B	1	0.996084	99.9905
GOTERM_MF_FAT	GO:0043492~ATPase activity, coupled to movement of substances	3	0.486379	ATP2C2, ABCD4, ATP7B	1	0.996084	99.9905									Annotation Cluster 89	Enrichment Score: 0.25555975160811334
GOTERM_MF_FAT	GO:0015399~primary active transmembrane transporter activity	3	0.53554	ATP2C2, ABCD4, ATP7B	1	0.996509	99.9977									Category	Term	Count	PValue	Genes	Bonferroni	Benjamini	FDR
GOTERM_MF_FAT	GO:0015405~P-P-bond-hydrolysis-driven transmembrane transporter activity	3	0.53554	ATP2C2, ABCD4, ATP7B	1	0.996509	99.9977									GOTERM_BP_FAT	GO:0001558~regulation of cell growth	6	0.233775	AGTR1, CDH13, CDKN1B, PPP2CA, NOL8, BARHL2	1	0.929537	98.9236
GOTERM_MF_FAT	GO:0016887~ATPase activity	6	0.652237	ATP2C2, RBBP4, GTF2H4, ABCD4, DYNC1H1, ATP7B	1	0.997896	100									GOTERM_BP_FAT	GO:0032535~regulation of cellular component size	4	0.837615	CDKN1B, PPP2CA, NOL8, SPTAN1	1	0.999826	100
																GOTERM_BP_FAT	GO:0008361~regulation of cell size	3	0.873934	CDKN1B, PPP2CA, NOL8	1	0.999945	100
Annotation Cluster 80	Enrichment Score: 0.27608875838948593
Category	Term	Count	PValue	Genes	Bonferroni	Benjamini	FDR									Annotation Cluster 90	Enrichment Score: 0.24377424676309603
GOTERM_BP_FAT	GO:0006865~amino acid transport	3	0.392905	SLC22A16, CLN8, APBA1	1	0.958667	99.9787									Category	Term	Count	PValue	Genes	Bonferroni	Benjamini	FDR
GOTERM_BP_FAT	GO:0015837~amine transport	3	0.537454	SLC22A16, CLN8, APBA1	1	0.985093	99.9998									GOTERM_BP_FAT	GO:0048839~inner ear development	3	0.407148	ATOH1, CDKN1B, MAFB	1	0.975629	99.9863
GOTERM_BP_FAT	GO:0046942~carboxylic acid transport	3	0.610251	SLC22A16, CLN8, APBA1	1	0.991757	100									GOTERM_BP_FAT	GO:0043583~ear development	3	0.505369	ATOH1, CDKN1B, MAFB	1	0.987953	99.9994
GOTERM_BP_FAT	GO:0015849~organic acid transport	3	0.610251	SLC22A16, CLN8, APBA1	1	0.991757	100									GOTERM_BP_FAT	GO:0007423~sensory organ development	3	0.902228	ATOH1, CDKN1B, MAFB	1	0.999979	100
Annotation Cluster 81	Enrichment Score: 0.2689178216876151															Annotation Cluster 91	Enrichment Score: 0.24148475806405623
Category	Term	Count	PValue	Genes	Bonferroni	Benjamini	FDR									Category	Term	Count	PValue	Genes	Bonferroni	Benjamini	FDR
SP_PIR_KEYWORDS	ubl conjugation	11	0.448564	HIST1H2AB, FUBP1, ICAM1, CCND1, CDKN1B, RBBP4, RGS12, RASGRF1, HIST2H2AC, TRIM41, LPIN1	1	0.947895	99.9606									GOTERM_CC_FAT	GO:0015630~microtubule cytoskeleton	10	0.464714	TUBGCP3, CEP350, PPP2CA, CAMSAP1, TEKT3, CENPF, MAP7, PCM1, APEX1, IFT88	1	0.982554	99.9762
SP_PIR_KEYWORDS	isopeptide bond	6	0.563769	HIST1H2AB, RBBP4, RGS12, HIST2H2AC, LPIN1, FN1	1	0.970949	99.9982									GOTERM_CC_FAT	GO:0005815~microtubule organizing center	5	0.577193	TUBGCP3, CEP350, PCM1, APEX1, IFT88	1	0.988001	99.999
UP_SEQ_FEATURE	cross-link:Glycyl lysine isopeptide (Lys-Gly) (interchain with G-Cter in ubiquitin)	4	0.617051	HIST1H2AB, RBBP4, RGS12, HIST2H2AC	1	1	100									GOTERM_CC_FAT	GO:0005813~centrosome	4	0.703135	TUBGCP3, CEP350, PCM1, APEX1	1	0.992484	100
Annotation Cluster 82	Enrichment Score: 0.2675028457476208															Annotation Cluster 92	Enrichment Score: 0.2388117127502248
Category	Term	Count	PValue	Genes	Bonferroni	Benjamini	FDR									Category	Term	Count	PValue	Genes	Bonferroni	Benjamini	FDR
GOTERM_MF_FAT	GO:0005089~Rho guanyl-nucleotide exchange factor activity	3	0.350898	RASGRF1, DOCK9, SGEF	1	0.986868	99.7541									GOTERM_MF_FAT	GO:0016881~acid-amino acid ligase activity	5	0.47015	TTLL10, UBE2W, MALT1, BCOR, ATG3	1	0.994096	99.986
GOTERM_MF_FAT	GO:0005088~Ras guanyl-nucleotide exchange factor activity	3	0.434133	RASGRF1, DOCK9, SGEF	1	0.994358	99.9635									GOTERM_MF_FAT	GO:0019787~small conjugating protein ligase activity	4	0.559965	UBE2W, MALT1, BCOR, ATG3	1	0.997594	99.999
SP_PIR_KEYWORDS	guanine-nucleotide releasing factor	3	0.567168	RASGRF1, DOCK9, SGEF	1	0.970315	99.9984									GOTERM_MF_FAT	GO:0016879~ligase activity, forming carbon-nitrogen bonds	5	0.575402	TTLL10, UBE2W, MALT1, BCOR, ATG3	1	0.997692	99.9994
GOTERM_MF_FAT	GO:0005083~small GTPase regulator activity	5	0.705943	RASGRF1, TBC1D14, DOCK9, TBC1D7, SGEF	1	0.998578	100									GOTERM_MF_FAT	GO:0004842~ubiquitin-protein ligase activity	3	0.731786	UBE2W, MALT1, BCOR	1	0.999313	100
GOTERM_MF_FAT	GO:0005085~guanyl-nucleotide exchange factor activity	3	0.753704	RASGRF1, DOCK9, SGEF	1	0.998845	100
																Annotation Cluster 93	Enrichment Score: 0.23428043443191265
Annotation Cluster 83	Enrichment Score: 0.2654213140962615															Category	Term	Count	PValue	Genes	Bonferroni	Benjamini	FDR
Category	Term	Count	PValue	Genes	Bonferroni	Benjamini	FDR									UP_SEQ_FEATURE	short sequence motif:Effector region	3	0.437536	RAB14, RAB12, NKIRAS2	1	0.999999	99.9863
INTERPRO	IPR013753:Ras	4	0.321663	RAP2B, RAB28, RAP1A, RASL12	1	0.999265	99.6273									SP_PIR_KEYWORDS	gtp-binding	6	0.517079	GFM2, RAB14, GNAS, RAB12, NKIRAS2, RNGTT	1	0.993474	99.9945
INTERPRO	IPR001806:Ras GTPase	4	0.371746	RAP2B, RAB28, RAP1A, RASL12	1	0.99968	99.8766									GOTERM_MF_FAT	GO:0005525~GTP binding	7	0.531576	GFM2, RAB14, GNAS, RAB12, INSR, NKIRAS2, RNGTT	1	0.996914	99.9975
UP_SEQ_FEATURE	short sequence motif:Effector region	3	0.437536	RAP2B, RAB28, RAP1A	1	1	99.9873									GOTERM_MF_FAT	GO:0019001~guanyl nucleotide binding	7	0.550547	GFM2, RAB14, GNAS, RAB12, INSR, NKIRAS2, RNGTT	1	0.997479	99.9986
GOTERM_MF_FAT	GO:0003924~GTPase activity	5	0.488463	RAP2B, RAB28, TUBB2C, RAP1A, RASL12	1	0.995748	99.991									GOTERM_MF_FAT	GO:0032561~guanyl ribonucleotide binding	7	0.550547	GFM2, RAB14, GNAS, RAB12, INSR, NKIRAS2, RNGTT	1	0.997479	99.9986
INTERPRO	IPR005225:Small GTP-binding protein	4	0.510806	RAP2B, RAB28, RAP1A, RASL12	1	0.999921	99.9966									GOTERM_BP_FAT	GO:0007264~small GTPase mediated signal transduction	6	0.617499	CDH13, YWHAQ, RAB14, RAB12, VAV2, NKIRAS2	1	0.995863	100
GOTERM_BP_FAT	GO:0007264~small GTPase mediated signal transduction	6	0.552393	RAP2B, RAB28, RASGRF1, ADRA2A, RAP1A, RASL12	1	0.986144	99.9999									UP_SEQ_FEATURE	nucleotide phosphate-binding region:GTP	5	0.62451	GFM2, RAB14, GNAS, RAB12, NKIRAS2	1	1	100
GOTERM_MF_FAT	GO:0005525~GTP binding	7	0.567423	RAP2B, RAB28, FKBP4, TUBB2C, DOCK9, RAP1A, RASL12	1	0.996126	99.9991									INTERPRO	IPR001806:Ras GTPase	3	0.634444	RAB14, RAB12, NKIRAS2	1	0.999988	100
GOTERM_MF_FAT	GO:0019001~guanyl nucleotide binding	7	0.586373	RAP2B, RAB28, FKBP4, TUBB2C, DOCK9, RAP1A, RASL12	1	0.996512	99.9995									GOTERM_MF_FAT	GO:0003924~GTPase activity	4	0.680038	GFM2, RAB14, GNAS, NKIRAS2	1	0.998473	100
GOTERM_MF_FAT	GO:0032561~guanyl ribonucleotide binding	7	0.586373	RAP2B, RAB28, FKBP4, TUBB2C, DOCK9, RAP1A, RASL12	1	0.996512	99.9995									INTERPRO	IPR005225:Small GTP-binding protein	3	0.748803	RAB14, RAB12, NKIRAS2	1	0.999995	100
UP_SEQ_FEATURE	nucleotide phosphate-binding region:GTP	5	0.62451	RAP2B, RAB28, TUBB2C, RAP1A, RASL12	1	1	100
SP_PIR_KEYWORDS	prenylation	3	0.66215	RAP2B, RAB28, RAP1A	1	0.98272	99.9999									Annotation Cluster 94	Enrichment Score: 0.23366653326543843
SP_PIR_KEYWORDS	gtp-binding	5	0.70266	RAP2B, RAB28, TUBB2C, RAP1A, RASL12	1	0.986434	100									Category	Term	Count	PValue	Genes	Bonferroni	Benjamini	FDR
SP_PIR_KEYWORDS	lipoprotein	7	0.867021	RECK, RAP2B, RAB28, RP2, ADRA2A, RAP1A, NR2F2	1	0.997147	100									UP_SEQ_FEATURE	domain:EF-hand 3	3	0.340033	SLC25A24, SPTAN1, KCNIP3	1	1	99.8374
																UP_SEQ_FEATURE	calcium-binding region:2	3	0.466422	SLC25A24, SPTAN1, KCNIP3	1	1	99.9939
Annotation Cluster 84	Enrichment Score: 0.25913169248721984															UP_SEQ_FEATURE	calcium-binding region:1	3	0.51076	SLC25A24, SPTAN1, KCNIP3	1	1	99.9984
Category	Term	Count	PValue	Genes	Bonferroni	Benjamini	FDR									INTERPRO	IPR018248:EF hand	3	0.528782	SLC25A24, SPTAN1, KCNIP3	1	0.999993	99.9981
SP_PIR_KEYWORDS	magnesium	8	0.502026	ATP2C2, MAP3K5, MAT2A, MAP3K8, ITGA2, PPM1B, APEX1, ATP7B	1	0.962435	99.9897									INTERPRO	IPR018247:EF-HAND 1	4	0.568828	MIER1, SLC25A24, SPTAN1, KCNIP3	1	0.99999	99.9995
UP_SEQ_FEATURE	metal ion-binding site:Magnesium	3	0.50535	ATP2C2, MAT2A, ATP7B	1	1	99.9983									INTERPRO	IPR002048:Calcium-binding EF-hand	3	0.606261	SLC25A24, SPTAN1, KCNIP3	1	0.99999	99.9999
GOTERM_MF_FAT	GO:0000287~magnesium ion binding	8	0.658092	ATP2C2, MAP3K5, MAT2A, MAP3K8, ITGA2, PPM1B, APEX1, ATP7B	1	0.997911	100									UP_SEQ_FEATURE	domain:EF-hand 2	3	0.666714	SLC25A24, SPTAN1, KCNIP3	1	1	100
																SMART	SM00054:EFh	3	0.711974	SLC25A24, SPTAN1, KCNIP3	1	0.999915	99.9999
Annotation Cluster 85	Enrichment Score: 0.2589237453807897															INTERPRO	IPR018249:EF-HAND 2	3	0.794953	SLC25A24, SPTAN1, KCNIP3	1	0.999999	100
Category	Term	Count	PValue	Genes	Bonferroni	Benjamini	FDR									INTERPRO	IPR011992:EF-Hand type	3	0.826331	SLC25A24, SPTAN1, KCNIP3	1	0.999999	100
GOTERM_MF_FAT	GO:0004709~MAP kinase kinase kinase activity	3	0.0382835	MAP3K5, MAP3K8, MAP3K11	1	0.78266	41.8804
GOTERM_BP_FAT	GO:0007254~JNK cascade	3	0.231975	MAP3K5, ROR2, MAP3K11	1	0.86062	98.8561									Annotation Cluster 95	Enrichment Score: 0.2327752800429654
GOTERM_BP_FAT	GO:0031098~stress-activated protein kinase signaling pathway	3	0.245534	MAP3K5, ROR2, MAP3K11	1	0.873622	99.154									Category	Term	Count	PValue	Genes	Bonferroni	Benjamini	FDR
GOTERM_BP_FAT	GO:0006796~phosphate metabolic process	19	0.289977	UQCRC1, TOLLIP, PTPRZ1, TRIM24, PPM1B, PPP1CC, CDC25B, DUSP4, CCND1, MAP3K5, BAZ1B, BCL2, MAP3K8, LMTK2, ADRA2A, ROR2, AKT3, MAP3K11, DUSP6	1	0.90878	99.6975									UP_SEQ_FEATURE	repeat:ANK 6	3	0.365021	ANKRD27, CTTNBP2, ANK1	1	1	99.9105
GOTERM_BP_FAT	GO:0006793~phosphorus metabolic process	19	0.289977	UQCRC1, TOLLIP, PTPRZ1, TRIM24, PPM1B, PPP1CC, CDC25B, DUSP4, CCND1, MAP3K5, BAZ1B, BCL2, MAP3K8, LMTK2, ADRA2A, ROR2, AKT3, MAP3K11, DUSP6	1	0.90878	99.6975									UP_SEQ_FEATURE	repeat:ANK 3	4	0.505242	ANKRD27, CTTNBP2, ANK1, BCOR	1	1	99.9981
BIOCARTA	h_mapkPathway:MAPKinase Signaling Pathway	4	0.33665	CEBPA, MAP3K5, MAP3K8, MAP3K11	1	0.992302	98.7666									UP_SEQ_FEATURE	repeat:ANK 5	3	0.516132	ANKRD27, CTTNBP2, ANK1	1	1	99.9987
INTERPRO	IPR001245:Tyrosine protein kinase	3	0.580778	LMTK2, ROR2, MAP3K11	1	0.999976	99.9996									UP_SEQ_FEATURE	repeat:ANK 1	4	0.627973	ANKRD27, CTTNBP2, ANK1, BCOR	1	1	100
GOTERM_BP_FAT	GO:0016310~phosphorylation	13	0.624985	UQCRC1, TOLLIP, TRIM24, CCND1, MAP3K5, BAZ1B, BCL2, MAP3K8, ADRA2A, LMTK2, ROR2, AKT3, MAP3K11	1	0.992929	100									UP_SEQ_FEATURE	repeat:ANK 4	3	0.628574	ANKRD27, CTTNBP2, ANK1	1	1	100
GOTERM_MF_FAT	GO:0004672~protein kinase activity	11	0.633389	CCND1, MAP3K5, BAZ1B, MAP3K8, FGFRL1, LMTK2, GTF2H4, ROR2, TRIM24, AKT3, MAP3K11	1	0.99738	99.9999									UP_SEQ_FEATURE	repeat:ANK 2	4	0.631566	ANKRD27, CTTNBP2, ANK1, BCOR	1	0.999999	100
GOTERM_BP_FAT	GO:0006468~protein amino acid phosphorylation	11	0.63817	CCND1, MAP3K5, BAZ1B, BCL2, MAP3K8, ADRA2A, LMTK2, ROR2, TRIM24, AKT3, MAP3K11	1	0.993923	100									SP_PIR_KEYWORDS	ank repeat	4	0.641595	ANKRD27, CTTNBP2, ANK1, BCOR	1	0.995653	99.9999
SMART	SM00219:TyrKc	3	0.691655	LMTK2, ROR2, MAP3K11	1	0.999639	99.9999									INTERPRO	IPR002110:Ankyrin	4	0.667907	ANKRD27, CTTNBP2, ANK1, BCOR	1	0.999991	100
UP_SEQ_FEATURE	binding site:ATP	8	0.741899	IARS, MAP3K5, MAT2A, MAP3K8, LMTK2, ROR2, AKT3, MAP3K11	1	1	100									SMART	SM00248:ANK	4	0.790227	ANKRD27, CTTNBP2, ANK1, BCOR	1	0.999973	100
UP_SEQ_FEATURE	active site:Proton acceptor	9	0.783176	MAP3K5, DHRS12, MAP3K8, LMTK2, ROR2, ACAT1, APEX1, AKT3, MAP3K11	1	1	100
UP_SEQ_FEATURE	nucleotide phosphate-binding region:ATP	13	0.810049	SHPRH, MAT2A, MCM6, MAP3K5, LACE1, MAP3K8, LMTK2, ROR2, ABCD4, DYNC1H1, EP400, AKT3, MAP3K11	1	1	100									Annotation Cluster 96	Enrichment Score: 0.232419884377719
SP_PIR_KEYWORDS	kinase	9	0.850452	MAP3K5, CDKN1B, BAZ1B, CDKN2B, MAP3K8, LMTK2, ROR2, AKT3, MAP3K11	1	0.996442	100									Category	Term	Count	PValue	Genes	Bonferroni	Benjamini	FDR
SP_PIR_KEYWORDS	serine/threonine-protein kinase	5	0.856144	MAP3K5, MAP3K8, LMTK2, AKT3, MAP3K11	1	0.996626	100									GOTERM_BP_FAT	GO:0009144~purine nucleoside triphosphate metabolic process	3	0.564767	PRKAG2, DGUOK, ATP5H	1	0.993147	99.9999
UP_SEQ_FEATURE	domain:Protein kinase	6	0.86153	MAP3K5, MAP3K8, LMTK2, ROR2, AKT3, MAP3K11	1	1	100									GOTERM_BP_FAT	GO:0006163~purine nucleotide metabolic process	4	0.589384	PRKAG2, DGUOK, IMPDH1, ATP5H	1	0.994643	100
INTERPRO	IPR017441:Protein kinase, ATP binding site	6	0.880887	MAP3K5, MAP3K8, LMTK2, ROR2, AKT3, MAP3K11	1	1	100									GOTERM_BP_FAT	GO:0009141~nucleoside triphosphate metabolic process	3	0.603216	PRKAG2, DGUOK, ATP5H	1	0.995228	100
GOTERM_MF_FAT	GO:0004674~protein serine/threonine kinase activity	6	0.886593	MAP3K5, MAP3K8, LMTK2, GTF2H4, AKT3, MAP3K11	1	0.999871	100
INTERPRO	IPR000719:Protein kinase, core	6	0.900786	MAP3K5, MAP3K8, LMTK2, ROR2, AKT3, MAP3K11	1	1	100									Annotation Cluster 97	Enrichment Score: 0.22941393946088307
INTERPRO	IPR008271:Serine/threonine protein kinase, active site	4	0.940336	MAP3K5, MAP3K8, AKT3, MAP3K11	1	1	100									Category	Term	Count	PValue	Genes	Bonferroni	Benjamini	FDR
INTERPRO	IPR017442:Serine/threonine protein kinase-related	4	0.942729	MAP3K5, MAP3K8, AKT3, MAP3K11	1	1	100									GOTERM_CC_FAT	GO:0005764~lysosome	4	0.554851	ANKRD27, FNBP1, RAB14, CTSC	1	0.986524	99.998
SP_PIR_KEYWORDS	transferase	15	0.96115	ELP3, MAT2A, ACAT1, STT3B, MLL5, MAP3K5, B3GNT5, BAZ1B, MAP3K8, LMTK2, ROR2, AKT3, HS3ST3B1, MAP3K11, NSUN4	1	0.999882	100									GOTERM_CC_FAT	GO:0000323~lytic vacuole	4	0.554851	ANKRD27, FNBP1, RAB14, CTSC	1	0.986524	99.998
																GOTERM_CC_FAT	GO:0005773~vacuole	4	0.665894	ANKRD27, FNBP1, RAB14, CTSC	1	0.989962	100
Annotation Cluster 86	Enrichment Score: 0.24613014409919887
Category	Term	Count	PValue	Genes	Bonferroni	Benjamini	FDR									Annotation Cluster 98	Enrichment Score: 0.2286225723709328
GOTERM_BP_FAT	GO:0009206~purine ribonucleoside triphosphate biosynthetic process	3	0.405782	ATP2C2, RP2, ATP7B	1	0.961758	99.9852									Category	Term	Count	PValue	Genes	Bonferroni	Benjamini	FDR
GOTERM_BP_FAT	GO:0009145~purine nucleoside triphosphate biosynthetic process	3	0.412172	ATP2C2, RP2, ATP7B	1	0.963414	99.9877									UP_SEQ_FEATURE	domain:EGF-like 2	3	0.340033	ATRNL1, F7, VWA2	1	1	99.8374
GOTERM_BP_FAT	GO:0009201~ribonucleoside triphosphate biosynthetic process	3	0.412172	ATP2C2, RP2, ATP7B	1	0.963414	99.9877									INTERPRO	IPR006210:EGF-like	4	0.551829	ATRNL1, ITGB5, F7, VWA2	1	0.999993	99.9991
GOTERM_BP_FAT	GO:0009142~nucleoside triphosphate biosynthetic process	3	0.424849	ATP2C2, RP2, ATP7B	1	0.965289	99.9915									INTERPRO	IPR013032:EGF-like region, conserved site	5	0.553268	LAMA2, ATRNL1, ITGB5, F7, VWA2	1	0.999991	99.9991
GOTERM_BP_FAT	GO:0009205~purine ribonucleoside triphosphate metabolic process	3	0.497727	ATP2C2, RP2, ATP7B	1	0.97876	99.9991									SMART	SM00181:EGF	4	0.684424	ATRNL1, ITGB5, F7, VWA2	1	0.999902	99.9998
GOTERM_BP_FAT	GO:0009199~ribonucleoside triphosphate metabolic process	3	0.503534	ATP2C2, RP2, ATP7B	1	0.979849	99.9993									INTERPRO	IPR000742:EGF-like, type 3	3	0.758692	ATRNL1, F7, VWA2	1	0.999995	100
GOTERM_BP_FAT	GO:0009152~purine ribonucleotide biosynthetic process	3	0.520693	ATP2C2, RP2, ATP7B	1	0.982787	99.9996									SP_PIR_KEYWORDS	egf-like domain	3	0.788157	ATRNL1, F7, VWA2	1	0.998487	100
GOTERM_BP_FAT	GO:0009144~purine nucleoside triphosphate metabolic process	3	0.526324	ATP2C2, RP2, ATP7B	1	0.983454	99.9997
GOTERM_BP_FAT	GO:0009260~ribonucleotide biosynthetic process	3	0.559171	ATP2C2, RP2, ATP7B	1	0.986886	99.9999									Annotation Cluster 99	Enrichment Score: 0.2176369508426861
GOTERM_BP_FAT	GO:0009141~nucleoside triphosphate metabolic process	3	0.564486	ATP2C2, RP2, ATP7B	1	0.987209	99.9999									Category	Term	Count	PValue	Genes	Bonferroni	Benjamini	FDR
GOTERM_BP_FAT	GO:0044271~nitrogen compound biosynthetic process	6	0.567536	CEBPA, TSPO, ATP2C2, MAT2A, RP2, ATP7B	1	0.98751	99.9999									GOTERM_BP_FAT	GO:0051259~protein oligomerization	6	0.168586	KCND2, TRPM8, BLM, KCNA2, MALT1, INSR	1	0.89209	95.6804
GOTERM_BP_FAT	GO:0009150~purine ribonucleotide metabolic process	3	0.610251	ATP2C2, RP2, ATP7B	1	0.991757	100									SP_PIR_KEYWORDS	potassium	4	0.307864	KCND2, KCNA2, IMPDH1, KCNIP3	1	0.967987	99.2993
GOTERM_BP_FAT	GO:0009259~ribonucleotide metabolic process	3	0.652282	ATP2C2, RP2, ATP7B	1	0.994794	100									GOTERM_MF_FAT	GO:0030955~potassium ion binding	4	0.370734	KCND2, KCNA2, IMPDH1, KCNIP3	1	0.989582	99.8451
GOTERM_BP_FAT	GO:0006164~purine nucleotide biosynthetic process	3	0.656724	ATP2C2, RP2, ATP7B	1	0.994969	100									SP_PIR_KEYWORDS	potassium channel	3	0.370794	KCND2, KCNA2, KCNIP3	1	0.977124	99.8062
GOTERM_BP_FAT	GO:0006163~purine nucleotide metabolic process	3	0.779241	ATP2C2, RP2, ATP7B	1	0.999126	100									INTERPRO	IPR005821:Ion transport	3	0.495037	KCND2, TRPM8, KCNA2	1	0.999992	99.9949
GOTERM_BP_FAT	GO:0009165~nucleotide biosynthetic process	3	0.785274	ATP2C2, RP2, ATP7B	1	0.999217	100									GOTERM_BP_FAT	GO:0006813~potassium ion transport	4	0.505642	CDKN1B, KCND2, KCNA2, KCNIP3	1	0.987812	99.9994
GOTERM_BP_FAT	GO:0034654~nucleobase, nucleoside, nucleotide and nucleic acid biosynthetic process	3	0.802517	ATP2C2, RP2, ATP7B	1	0.999426	100									SP_PIR_KEYWORDS	potassium transport	3	0.531522	KCND2, KCNA2, KCNIP3	1	0.991954	99.9964
GOTERM_BP_FAT	GO:0034404~nucleobase, nucleoside and nucleotide biosynthetic process	3	0.802517	ATP2C2, RP2, ATP7B	1	0.999426	100									GOTERM_MF_FAT	GO:0046873~metal ion transmembrane transporter activity	6	0.591474	TF, KCND2, TRPM8, KCNA2, GRIN1, KCNIP3	1	0.997339	99.9996
																GOTERM_MF_FAT	GO:0005261~cation channel activity	5	0.636123	KCND2, TRPM8, KCNA2, GRIN1, KCNIP3	1	0.998133	99.9999
Annotation Cluster 87	Enrichment Score: 0.2388997464925457															SP_PIR_KEYWORDS	voltage-gated channel	3	0.63684	KCND2, KCNA2, KCNIP3	1	0.995744	99.9999
Category	Term	Count	PValue	Genes	Bonferroni	Benjamini	FDR									SP_PIR_KEYWORDS	ionic channel	5	0.648467	KCND2, TRPM8, KCNA2, GRIN1, KCNIP3	1	0.995309	99.9999
GOTERM_BP_FAT	GO:0006811~ion transport	15	0.204103	CNNM2, SLC22A16, TSPO, FKBP4, TTYH3, ATP2C2, CDKN1B, KCNF1, KCTD15, CHRNB2, MCOLN2, CLN8, CACNA1D, ATP7B, NFATC1	1	0.835322	97.9077									GOTERM_MF_FAT	GO:0005267~potassium channel activity	3	0.65258	KCND2, KCNA2, KCNIP3	1	0.998296	100
GOTERM_CC_FAT	GO:0034702~ion channel complex	5	0.279485	TTYH3, KCNF1, CHRNB2, KCTD15, CACNA1D	1	0.921714	98.663									SP_PIR_KEYWORDS	ion transport	8	0.663972	TF, KCND2, TRPM8, KCNA2, GRIN1, NIPA1, ATP5H, KCNIP3	1	0.994776	100
GOTERM_BP_FAT	GO:0006816~calcium ion transport	4	0.355875	ATP2C2, CHRNB2, CACNA1D, NFATC1	1	0.944531	99.9419									GOTERM_MF_FAT	GO:0031420~alkali metal ion binding	4	0.672843	KCND2, KCNA2, IMPDH1, KCNIP3	1	0.998417	100
GOTERM_BP_FAT	GO:0030001~metal ion transport	9	0.372596	ATP2C2, CDKN1B, FKBP4, KCNF1, CHRNB2, KCTD15, CACNA1D, ATP7B, NFATC1	1	0.950101	99.9628									GOTERM_BP_FAT	GO:0015672~monovalent inorganic cation transport	5	0.72399	CDKN1B, KCND2, KCNA2, ATP5H, KCNIP3	1	0.998702	100
GOTERM_BP_FAT	GO:0006812~cation transport	10	0.410029	SLC22A16, ATP2C2, CDKN1B, FKBP4, KCNF1, CHRNB2, KCTD15, CACNA1D, ATP7B, NFATC1	1	0.963009	99.9869									GOTERM_BP_FAT	GO:0030001~metal ion transport	7	0.74492	TF, CDKN1B, KCND2, TRPM8, KCNA2, GRIN1, KCNIP3	1	0.99901	100
GOTERM_BP_FAT	GO:0015674~di-, tri-valent inorganic cation transport	4	0.496254	ATP2C2, CHRNB2, CACNA1D, NFATC1	1	0.978932	99.9991									GOTERM_MF_FAT	GO:0015267~channel activity	6	0.747752	KCND2, TRPM8, KCNA2, GRIN1, GJA3, KCNIP3	1	0.9994	100
INTERPRO	IPR005821:Ion transport	3	0.504205	KCNF1, MCOLN2, CACNA1D	1	0.999927	99.9959									GOTERM_MF_FAT	GO:0022803~passive transmembrane transporter activity	6	0.750133	KCND2, TRPM8, KCNA2, GRIN1, GJA3, KCNIP3	1	0.999308	100
SP_PIR_KEYWORDS	ion transport	9	0.520809	CNNM2, TTYH3, SLC22A16, ATP2C2, KCNF1, CHRNB2, MCOLN2, CACNA1D, ATP7B	1	0.962834	99.9938									GOTERM_BP_FAT	GO:0006812~cation transport	8	0.763379	TF, CDKN1B, KCND2, TRPM8, KCNA2, GRIN1, ATP5H, KCNIP3	1	0.999192	100
GOTERM_CC_FAT	GO:0034703~cation channel complex	3	0.54402	KCNF1, KCTD15, CACNA1D	1	0.984828	99.9968									GOTERM_MF_FAT	GO:0005244~voltage-gated ion channel activity	3	0.815005	KCND2, KCNA2, KCNIP3	1	0.999821	100
GOTERM_MF_FAT	GO:0046873~metal ion transmembrane transporter activity	6	0.623775	ATP2C2, KCNF1, CHRNB2, KCTD15, CACNA1D, ATP7B	1	0.997682	99.9999									GOTERM_MF_FAT	GO:0022832~voltage-gated channel activity	3	0.815005	KCND2, KCNA2, KCNIP3	1	0.999821	100
GOTERM_MF_FAT	GO:0015267~channel activity	7	0.625932	TTYH3, KCNF1, CHRNB2, KCTD15, MCOLN2, CACNA1D, GJB2	1	0.99754	99.9999									GOTERM_MF_FAT	GO:0005216~ion channel activity	5	0.838868	KCND2, TRPM8, KCNA2, GRIN1, KCNIP3	1	0.999889	100
GOTERM_MF_FAT	GO:0022803~passive transmembrane transporter activity	7	0.628885	TTYH3, KCNF1, CHRNB2, KCTD15, MCOLN2, CACNA1D, GJB2	1	0.997427	99.9999									GOTERM_MF_FAT	GO:0022836~gated channel activity	4	0.848422	KCND2, KCNA2, GRIN1, KCNIP3	1	0.999897	100
SP_PIR_KEYWORDS	ionic channel	5	0.648467	TTYH3, KCNF1, CHRNB2, MCOLN2, CACNA1D	1	0.981013	99.9999									GOTERM_MF_FAT	GO:0022838~substrate specific channel activity	5	0.851318	KCND2, TRPM8, KCNA2, GRIN1, KCNIP3	1	0.999896	100
GOTERM_MF_FAT	GO:0022843~voltage-gated cation channel activity	3	0.707127	KCNF1, KCTD15, CACNA1D	1	0.998479	100									GOTERM_BP_FAT	GO:0006811~ion transport	9	0.906592	CTTNBP2, TF, CDKN1B, KCND2, TRPM8, KCNA2, GRIN1, ATP5H, KCNIP3	1	0.999983	100
GOTERM_MF_FAT	GO:0005216~ion channel activity	6	0.72654	TTYH3, KCNF1, CHRNB2, KCTD15, MCOLN2, CACNA1D	1	0.998496	100
GOTERM_MF_FAT	GO:0022838~substrate specific channel activity	6	0.744483	TTYH3, KCNF1, CHRNB2, KCTD15, MCOLN2, CACNA1D	1	0.99873	100									Annotation Cluster 100	Enrichment Score: 0.21211913399966562
GOTERM_MF_FAT	GO:0022832~voltage-gated channel activity	3	0.830629	KCNF1, KCTD15, CACNA1D	1	0.999716	100									Category	Term	Count	PValue	Genes	Bonferroni	Benjamini	FDR
GOTERM_MF_FAT	GO:0005244~voltage-gated ion channel activity	3	0.830629	KCNF1, KCTD15, CACNA1D	1	0.999716	100									SP_PIR_KEYWORDS	zinc	36	0.282086	ABLIM2, ARFGAP3, RSF1, MMP9, ZNF295, PRDM16, PRDM13, PRDM12, PRDM15, PPP2CA, LHX2, ZNF471, RNF149, NR2F2, LHX9, ZNF528, ZCCHC10, KCND2, EGR2, LIMK2, DMRT3, L3MBTL, NR4A2, POLR1A, PRKCE, VAV2, ZFP37, FEZF2, ISL2, EBF3, ZIC4, EBF1, ZIC5, SH3RF2, USP44, RNF111	1	0.96287	98.8529
GOTERM_MF_FAT	GO:0005261~cation channel activity	4	0.833222	KCNF1, CHRNB2, KCTD15, CACNA1D	1	0.999709	100									SP_PIR_KEYWORDS	metal-binding	44	0.485995	PPP6C, ABLIM2, TF, ARFGAP3, RSF1, MMP9, ZNF295, PRDM16, PRDM13, PRDM12, PRDM15, LHX2, PPP2CA, ZNF471, RNF149, NR2F2, MAP2K7, APEX1, IMPDH1, INSR, LHX9, ZNF528, ZCCHC10, KCND2, EGR2, LIMK2, DMRT3, L3MBTL, NR4A2, POLR1A, CYP2E1, PRKCE, VAV2, XPNPEP1, ZFP37, FEZF2, ISL2, EBF3, ZIC4, ZIC5, EBF1, SH3RF2, USP44, RNF111	1	0.992714	99.9873
GOTERM_BP_FAT	GO:0055085~transmembrane transport	7	0.846923	SLC22A16, KCNF1, ABCD4, MCOLN2, NUP107, CACNA1D, ATP7B	1	0.999764	100									GOTERM_MF_FAT	GO:0008270~zinc ion binding	37	0.529674	ABLIM2, ARFGAP3, RSF1, MMP9, ZNF295, PRDM16, IARS, PRDM13, PRDM12, PRDM15, LHX2, ZNF471, RNF149, NR2F2, LHX9, ZNF528, ZCCHC10, KCND2, EGR2, LIMK2, DMRT3, L3MBTL, NR4A2, POLR1A, PRKCE, VAV2, TAX1BP1, ZFP37, FEZF2, ISL2, EBF3, ZIC4, ZIC5, EBF1, SH3RF2, USP44, RNF111	1	0.99715	99.9973
GOTERM_MF_FAT	GO:0022836~gated channel activity	4	0.865253	KCNF1, CHRNB2, KCTD15, CACNA1D	1	0.999818	100									SP_PIR_KEYWORDS	zinc-finger	26	0.539607	ARFGAP3, RSF1, ZNF295, PRDM16, PRDM13, PRDM12, PRDM15, ZNF471, RNF149, NR2F2, ZNF528, ZCCHC10, EGR2, L3MBTL, NR4A2, PRKCE, VAV2, ZFP37, FEZF2, EBF3, ZIC4, EBF1, ZIC5, SH3RF2, RNF111, USP44	1	0.992066	99.9971
SP_PIR_KEYWORDS	transport	16	0.983685	CNNM2, SLC22A16, UQCRC1, SFT2D3, TTYH3, ATP2C2, COG7, KCNF1, CHRNB2, ABCD4, MCOLN2, NUP107, TNPO1, CACNA1D, APBA1, ATP7B	1	0.99998	100									GOTERM_MF_FAT	GO:0046914~transition metal ion binding	42	0.66996	PPP6C, ABLIM2, TF, ARFGAP3, RSF1, MMP9, ZNF295, PRDM16, IARS, PRDM13, PRDM12, PRDM15, LHX2, PPP2CA, ZNF471, RNF149, NR2F2, LHX9, ZNF528, ZCCHC10, KCND2, EGR2, LIMK2, DMRT3, L3MBTL, NR4A2, POLR1A, CYP2E1, PRKCE, VAV2, TAX1BP1, XPNPEP1, ZFP37, FEZF2, ISL2, EBF3, ZIC4, ZIC5, EBF1, SH3RF2, USP44, RNF111	1	0.998482	100
																GOTERM_MF_FAT	GO:0043167~ion binding	58	0.898771	RSF1, CLTB, MMP9, ZNF295, PCDHGA8, PCDHGA2, KCNIP3, SLC25A24, RNF149, NR2F2, MAP2K7, IMPDH1, ZCCHC10, KCND2, EGR2, LIMK2, DMRT3, POLR1A, CYP2E1, F7, PRKCE, ZFP37, CTSC, PPP6C, TF, ABLIM2, ARFGAP3, KCNA2, PRDM16, PRDM13, IARS, PRDM12, PRDM15, PPP2CA, LHX2, ZNF471, APEX1, LHX9, ZNF528, L3MBTL, GRIN1, NR4A2, NPR3, PRPSAP1, VAV2, XPNPEP1, TAX1BP1, FEZF2, CDH13, ISL2, EBF3, ZIC4, EBF1, ZIC5, SH3RF2, U…	1	0.999979	100
Annotation Cluster 88	Enrichment Score: 0.20929006072578216															GOTERM_MF_FAT	GO:0046872~metal ion binding	56	0.917195	RSF1, CLTB, MMP9, ZNF295, PCDHGA8, PCDHGA2, KCNIP3, SLC25A24, RNF149, NR2F2, MAP2K7, IMPDH1, ZCCHC10, KCND2, EGR2, LIMK2, DMRT3, POLR1A, CYP2E1, F7, PRKCE, ZFP37, PPP6C, TF, ABLIM2, ARFGAP3, KCNA2, PRDM16, PRDM13, IARS, PRDM12, PRDM15, PPP2CA, LHX2, ZNF471, APEX1, LHX9, ZNF528, L3MBTL, GRIN1, NR4A2, PRPSAP1, VAV2, XPNPEP1, TAX1BP1, FEZF2, CDH13, ISL2, EBF3, ZIC4, EBF1, ZIC5, SH3RF2, USP44, RNF111…	1	0.999989	100
Category	Term	Count	PValue	Genes	Bonferroni	Benjamini	FDR									GOTERM_MF_FAT	GO:0043169~cation binding	56	0.928512	RSF1, CLTB, MMP9, ZNF295, PCDHGA8, PCDHGA2, KCNIP3, SLC25A24, RNF149, NR2F2, MAP2K7, IMPDH1, ZCCHC10, KCND2, EGR2, LIMK2, DMRT3, POLR1A, CYP2E1, F7, PRKCE, ZFP37, PPP6C, TF, ABLIM2, ARFGAP3, KCNA2, PRDM16, PRDM13, IARS, PRDM12, PRDM15, PPP2CA, LHX2, ZNF471, APEX1, LHX9, ZNF528, L3MBTL, GRIN1, NR4A2, PRPSAP1, VAV2, XPNPEP1, TAX1BP1, FEZF2, CDH13, ISL2, EBF3, ZIC4, EBF1, ZIC5, SH3RF2, USP44, RNF111…	1	0.999994	100
UP_SEQ_FEATURE	zinc finger region:C2H2-type 5	11	0.230434	ZNF30, INSM1, ZNF544, BCL11A, GLIS1, BCL6B, ZNF684, ZNF319, PRDM16, GLI3, ZNF331	1	0.999837	98.313
UP_SEQ_FEATURE	zinc finger region:C2H2-type 4	11	0.317612	ZNF30, INSM1, ZNF544, BCL11A, GLIS1, BCL6B, ZNF684, ZNF319, PRDM16, GLI3, ZNF331	1	0.999985	99.741									Annotation Cluster 101	Enrichment Score: 0.20465348352286442
INTERPRO	IPR007087:Zinc finger, C2H2-type	14	0.410168	INSM1, ZNF544, GLIS1, ZNF684, PRDM16, GLI3, TANK, ZNF331, ZNF174, ZNF30, ZNF804B, BCL11A, BCL6B, ZNF319	1	0.999675	99.9503									Category	Term	Count	PValue	Genes	Bonferroni	Benjamini	FDR
UP_SEQ_FEATURE	zinc finger region:C2H2-type 3	11	0.413718	INSM1, ZNF544, BCL11A, GLIS1, BCL6B, ZNF684, ZNF319, PRDM16, GLI3, ZNF331, ZNF174	1	0.999999	99.9757									GOTERM_BP_FAT	GO:0009152~purine ribonucleotide biosynthetic process	3	0.559061	PRKAG2, IMPDH1, ATP5H	1	0.992826	99.9999
INTERPRO	IPR013087:Zinc finger, C2H2-type/integrase, DNA-binding	11	0.443256	ZNF30, ZNF544, BCL11A, GLIS1, BCL6B, ZNF684, ZNF319, PRDM16, GLI3, ZNF331, ZNF174	1	0.999716	99.9784									GOTERM_BP_FAT	GO:0006163~purine nucleotide metabolic process	4	0.589384	PRKAG2, DGUOK, IMPDH1, ATP5H	1	0.994643	100
UP_SEQ_FEATURE	zinc finger region:C2H2-type 2	10	0.550391	ZNF30, INSM1, ZNF544, BCL11A, BCL6B, ZNF684, PRDM16, GLI3, ZNF331, ZNF174	1	1	99.9996									GOTERM_BP_FAT	GO:0009260~ribonucleotide biosynthetic process	3	0.597883	PRKAG2, IMPDH1, ATP5H	1	0.995014	100
INTERPRO	IPR015880:Zinc finger, C2H2-like	13	0.557642	INSM1, ZNF544, GLIS1, ZNF684, PRDM16, GLI3, ZNF331, ZNF174, ZNF30, ZNF804B, BCL11A, BCL6B, ZNF319	1	0.999964	99.9992									GOTERM_BP_FAT	GO:0009165~nucleotide biosynthetic process	4	0.598115	PRKAG2, PRPSAP1, IMPDH1, ATP5H	1	0.994947	100
UP_SEQ_FEATURE	zinc finger region:C2H2-type 12	4	0.662821	ZNF30, ZNF544, ZNF319, ZNF331	1	1	100									GOTERM_BP_FAT	GO:0034404~nucleobase, nucleoside and nucleotide biosynthetic process	4	0.623574	PRKAG2, PRPSAP1, IMPDH1, ATP5H	1	0.996158	100
UP_SEQ_FEATURE	zinc finger region:C2H2-type 10	5	0.675604	ZNF30, ZNF544, ZNF319, PRDM16, ZNF331	1	1	100									GOTERM_BP_FAT	GO:0034654~nucleobase, nucleoside, nucleotide and nucleic acid biosynthetic process	4	0.623574	PRKAG2, PRPSAP1, IMPDH1, ATP5H	1	0.996158	100
UP_SEQ_FEATURE	zinc finger region:C2H2-type 6	7	0.685589	ZNF30, ZNF544, BCL11A, ZNF684, ZNF319, PRDM16, ZNF331	1	1	100									GOTERM_BP_FAT	GO:0044271~nitrogen compound biosynthetic process	6	0.63044	BCAT2, PRKAG2, NR4A2, PRPSAP1, IMPDH1, ATP5H	1	0.996291	100
UP_SEQ_FEATURE	zinc finger region:C2H2-type 8	6	0.690323	ZNF30, ZNF544, ZNF684, ZNF319, PRDM16, ZNF331	1	1	100									GOTERM_BP_FAT	GO:0009150~purine ribonucleotide metabolic process	3	0.648822	PRKAG2, IMPDH1, ATP5H	1	0.997115	100
UP_SEQ_FEATURE	zinc finger region:C2H2-type 1	8	0.716342	BCL11A, GLIS1, BCL6B, ZNF684, ZNF319, GLI3, ZNF331, ZNF174	1	1	100									GOTERM_BP_FAT	GO:0009259~ribonucleotide metabolic process	3	0.690191	PRKAG2, IMPDH1, ATP5H	1	0.998162	100
UP_SEQ_FEATURE	zinc finger region:C2H2-type 9	5	0.76731	ZNF30, ZNF544, ZNF319, PRDM16, ZNF331	1	1	100									GOTERM_BP_FAT	GO:0006164~purine nucleotide biosynthetic process	3	0.694532	PRKAG2, IMPDH1, ATP5H	1	0.998231	100
SMART	SM00355:ZnF_C2H2	13	0.820996	INSM1, ZNF544, GLIS1, ZNF684, PRDM16, GLI3, ZNF331, ZNF174, ZNF30, ZNF804B, BCL11A, BCL6B, ZNF319	1	0.999955	100
INTERPRO	IPR001909:Krueppel-associated box	4	0.861964	ZNF30, ZNF544, ZNF684, ZNF331	1	1	100									Annotation Cluster 102	Enrichment Score: 0.1939842650475795
UP_SEQ_FEATURE	zinc finger region:C2H2-type 11	3	0.907835	ZNF30, ZNF544, ZNF331	1	1	100									Category	Term	Count	PValue	Genes	Bonferroni	Benjamini	FDR
UP_SEQ_FEATURE	domain:KRAB	3	0.934512	ZNF544, ZNF684, ZNF331	1	1	100									GOTERM_CC_FAT	GO:0030659~cytoplasmic vesicle membrane	3	0.581816	CTTNBP2, CLTB, COPE	1	0.985865	99.9991
SMART	SM00349:KRAB	4	0.937426	ZNF30, ZNF544, ZNF684, ZNF331	1	0.999998	100									GOTERM_CC_FAT	GO:0012506~vesicle membrane	3	0.635154	CTTNBP2, CLTB, COPE	1	0.987949	99.9999
UP_SEQ_FEATURE	zinc finger region:C2H2-type 7	4	0.952889	ZNF30, ZNF544, ZNF684, ZNF331	1	1	100									GOTERM_CC_FAT	GO:0044433~cytoplasmic vesicle part	3	0.708569	CTTNBP2, CLTB, COPE	1	0.992545	100
Annotation Cluster 89	Enrichment Score: 0.20088902008706844															Annotation Cluster 103	Enrichment Score: 0.19206650558190708
Category	Term	Count	PValue	Genes	Bonferroni	Benjamini	FDR									Category	Term	Count	PValue	Genes	Bonferroni	Benjamini	FDR
GOTERM_BP_FAT	GO:0009101~glycoprotein biosynthetic process	4	0.4588	STT3B, B3GNT5, COG7, HS3ST3B1	1	0.972513	99.997									GOTERM_BP_FAT	GO:0051329~interphase of mitotic cell cycle	4	0.301657	PPP6C, CDKN1B, BLM, CENPF	1	0.951147	99.778
GOTERM_BP_FAT	GO:0006486~protein amino acid glycosylation	3	0.605351	STT3B, B3GNT5, COG7	1	0.991335	100									GOTERM_BP_FAT	GO:0051325~interphase	4	0.317797	PPP6C, CDKN1B, BLM, CENPF	1	0.955028	99.8509
GOTERM_BP_FAT	GO:0043413~biopolymer glycosylation	3	0.605351	STT3B, B3GNT5, COG7	1	0.991335	100									UP_SEQ_FEATURE	short sequence motif:Nuclear localization signal	7	0.406732	CDKN1B, BLM, LHX2, THYN1, TLE3, CENPF, SIM1	1	1	99.9687
GOTERM_BP_FAT	GO:0070085~glycosylation	3	0.605351	STT3B, B3GNT5, COG7	1	0.991335	100									GOTERM_BP_FAT	GO:0000278~mitotic cell cycle	6	0.819485	PPP6C, CDKN1B, BLM, BTRC, PSMA3, CENPF	1	0.999729	100
GOTERM_BP_FAT	GO:0009100~glycoprotein metabolic process	4	0.623751	STT3B, B3GNT5, COG7, HS3ST3B1	1	0.993012	100									GOTERM_BP_FAT	GO:0022402~cell cycle process	7	0.950944	PPP6C, CDKN1B, BLM, BTRC, PSMA3, CENPF, SESN2	1	0.999999	100
SP_PIR_KEYWORDS	golgi apparatus	5	0.981772	ARHGAP21, B3GNT5, COG7, HS3ST3B1, ATP7B	1	0.999975	100									SP_PIR_KEYWORDS	cell cycle	4	0.982935	PPP6C, CDKN1B, CENPF, CDC5L	1	0.999998	100
																GOTERM_BP_FAT	GO:0022403~cell cycle phase	4	0.983293	PPP6C, CDKN1B, BLM, CENPF	1	1	100
Annotation Cluster 90	Enrichment Score: 0.1979451265052783															GOTERM_BP_FAT	GO:0007049~cell cycle	8	0.989908	PPP6C, CDKN1B, BLM, BTRC, PSMA3, CENPF, CDC5L, SESN2	1	1	100
Category	Term	Count	PValue	Genes	Bonferroni	Benjamini	FDR
GOTERM_BP_FAT	GO:0014706~striated muscle tissue development	3	0.542951	TBX5, FOXC1, NR2F2	1	0.985662	99.9998									Annotation Cluster 104	Enrichment Score: 0.17996625880184977
GOTERM_BP_FAT	GO:0060537~muscle tissue development	3	0.569755	TBX5, FOXC1, NR2F2	1	0.987682	99.9999									Category	Term	Count	PValue	Genes	Bonferroni	Benjamini	FDR
GOTERM_BP_FAT	GO:0007517~muscle organ development	3	0.823599	TBX5, FOXC1, NR2F2	1	0.99959	100									UP_SEQ_FEATURE	zinc finger region:C2H2-type 2	11	0.41166	PRDM13, ZNF528, PRDM12, FEZF2, PRDM15, EGR2, ZNF295, ZIC5, ZNF471, PRDM16, ZFP37	1	1	99.9725
																UP_SEQ_FEATURE	zinc finger region:C2H2-type 3	11	0.413718	PRDM13, ZNF528, PRDM12, FEZF2, PRDM15, EGR2, ZIC4, ZNF295, ZIC5, ZNF471, PRDM16	1	0.999999	99.9739
Annotation Cluster 91	Enrichment Score: 0.18471805744461187															UP_SEQ_FEATURE	zinc finger region:C2H2-type 15	3	0.51076	ZNF528, PRDM15, ZNF471	1	1	99.9984
Category	Term	Count	PValue	Genes	Bonferroni	Benjamini	FDR									INTERPRO	IPR015880:Zinc finger, C2H2-like	13	0.533181	ZNF528, EGR2, ZNF295, PRDM16, TAX1BP1, ZFP37, PRDM13, PRDM12, FEZF2, PRDM15, ZIC4, ZIC5, ZNF471	1	0.999991	99.9984
INTERPRO	IPR003961:Fibronectin, type III	4	0.541994	PTPRZ1, BZRAP1, LRRN1, FN1	1	0.999957	99.9987									SP_PIR_KEYWORDS	zinc-finger	26	0.539607	ARFGAP3, RSF1, ZNF295, PRDM16, PRDM13, PRDM12, PRDM15, ZNF471, RNF149, NR2F2, ZNF528, ZCCHC10, EGR2, L3MBTL, NR4A2, PRKCE, VAV2, ZFP37, FEZF2, EBF3, ZIC4, EBF1, ZIC5, SH3RF2, RNF111, USP44	1	0.992066	99.9971
SMART	SM00060:FN3	4	0.680094	PTPRZ1, BZRAP1, LRRN1, FN1	1	0.999698	99.9998									INTERPRO	IPR013087:Zinc finger, C2H2-type/integrase, DNA-binding	10	0.556612	ZNF528, PRDM12, FEZF2, PRDM15, EGR2, ZIC4, ZIC5, ZNF471, PRDM16, ZFP37	1	0.999989	99.9992
INTERPRO	IPR008957:Fibronectin, type III-like fold	3	0.757326	PTPRZ1, BZRAP1, FN1	1	1	100									UP_SEQ_FEATURE	zinc finger region:C2H2-type 1	9	0.578034	PRDM13, ZNF528, PRDM12, FEZF2, PRDM15, EGR2, ZNF295, ZNF471, ZFP37	1	1	99.9998
																UP_SEQ_FEATURE	zinc finger region:C2H2-type 4	9	0.592298	PRDM13, ZNF528, FEZF2, PRDM15, ZIC4, ZIC5, ZNF471, PRDM16, ZFP37	1	1	99.9999
Annotation Cluster 92	Enrichment Score: 0.1819766427821656															UP_SEQ_FEATURE	zinc finger region:C2H2-type 14	3	0.605964	ZNF528, PRDM15, ZNF471	1	1	99.9999
Category	Term	Count	PValue	Genes	Bonferroni	Benjamini	FDR									PIR_SUPERFAMILY	PIRSF005559:zinc finger protein ZFP-36	3	0.614342	ZNF528, ZNF471, ZFP37	1	1	99.9985
GOTERM_CC_FAT	GO:0019867~outer membrane	4	0.166416	TSPO, BCL2, ITGA2, PPP1CC	1	0.840177	90.8916									INTERPRO	IPR007087:Zinc finger, C2H2-type	12	0.623726	PRDM13, ZNF528, PRDM12, FEZF2, PRDM15, EGR2, ZIC4, ZNF295, ZIC5, ZNF471, PRDM16, ZFP37	1	0.99999	99.9999
GOTERM_CC_FAT	GO:0005741~mitochondrial outer membrane	3	0.331213	TSPO, BCL2, PPP1CC	1	0.939536	99.4986									UP_SEQ_FEATURE	zinc finger region:C2H2-type 5	8	0.64188	ZNF528, FEZF2, PRDM15, ZIC4, ZNF295, ZNF471, PRDM16, ZFP37	1	1	100
GOTERM_CC_FAT	GO:0031968~organelle outer membrane	3	0.395424	TSPO, BCL2, PPP1CC	1	0.961573	99.8672									UP_SEQ_FEATURE	zinc finger region:C2H2-type 12	4	0.662821	ZNF528, PRDM15, ZNF471, ZFP37	1	1	100
GOTERM_CC_FAT	GO:0031975~envelope	8	0.759707	TSPO, UQCRC1, BCL2, ITGA2, NUP107, PPP1CC, ACAT1, TNPO1	1	0.996379	100									UP_SEQ_FEATURE	zinc finger region:C2H2-type 10	5	0.675604	ZNF528, PRDM15, ZNF471, PRDM16, ZFP37	1	1	100
GOTERM_CC_FAT	GO:0031966~mitochondrial membrane	5	0.7826	TSPO, UQCRC1, BCL2, PPP1CC, ACAT1	1	0.997109	100									UP_SEQ_FEATURE	zinc finger region:C2H2-type 8	6	0.690323	ZNF528, PRDM15, ZNF295, ZNF471, PRDM16, ZFP37	1	1	100
GOTERM_CC_FAT	GO:0005635~nuclear envelope	3	0.795159	BCL2, NUP107, TNPO1	1	0.997056	100									UP_SEQ_FEATURE	zinc finger region:C2H2-type 13	3	0.753084	ZNF528, PRDM15, ZNF471	1	1	100
GOTERM_CC_FAT	GO:0005740~mitochondrial envelope	5	0.825134	TSPO, UQCRC1, BCL2, PPP1CC, ACAT1	1	0.997887	100									UP_SEQ_FEATURE	zinc finger region:C2H2-type 11	4	0.758226	ZNF528, PRDM15, ZNF471, ZFP37	1	1	100
GOTERM_CC_FAT	GO:0031967~organelle envelope	7	0.861767	TSPO, UQCRC1, BCL2, NUP107, PPP1CC, ACAT1, TNPO1	1	0.998474	100									UP_SEQ_FEATURE	zinc finger region:C2H2-type 9	5	0.76731	ZNF528, PRDM15, ZNF471, PRDM16, ZFP37	1	1	100
GOTERM_CC_FAT	GO:0031090~organelle membrane	11	0.942963	STT3B, TSPO, UQCRC1, VAPA, BCL2, FAAH, HSPA5, PPP1CC, ACAT1, ITGA2B, GJB2	1	0.999826	100									SMART	SM00355:ZnF_C2H2	13	0.794199	ZNF528, EGR2, ZNF295, PRDM16, TAX1BP1, ZFP37, PRDM13, PRDM12, FEZF2, PRDM15, ZIC4, ZIC5, ZNF471	1	0.99996	100
GOTERM_CC_FAT	GO:0044429~mitochondrial part	5	0.970073	TSPO, UQCRC1, BCL2, PPP1CC, ACAT1	1	0.999965	100									UP_SEQ_FEATURE	zinc finger region:C2H2-type 6	6	0.819331	ZNF528, FEZF2, PRDM15, ZNF471, PRDM16, ZFP37	1	1	100
SP_PIR_KEYWORDS	mitochondrion	7	0.987816	TSPO, UQCRC1, CCDC90B, BCL2, BZRAP1, ACAT1, ATP7B	1	0.999989	100									UP_SEQ_FEATURE	zinc finger region:C2H2-type 7	5	0.877791	ZNF528, PRDM15, ZNF295, ZNF471, ZFP37	1	1	100
GOTERM_CC_FAT	GO:0005739~mitochondrion	9	0.989432	TSPO, UQCRC1, CCDC90B, BCL2, BZRAP1, DPYSL2, PPP1CC, ACAT1, ATP7B	1	0.999997	100									UP_SEQ_FEATURE	domain:KRAB	3	0.934512	ZNF528, ZNF471, ZFP37	1	1	100
																INTERPRO	IPR001909:Krueppel-associated box	3	0.951627	ZNF528, ZNF471, ZFP37	1	1	100
Annotation Cluster 93	Enrichment Score: 0.17156509154476954															SMART	SM00349:KRAB	3	0.980531	ZNF528, ZNF471, ZFP37	1	1	100
Category	Term	Count	PValue	Genes	Bonferroni	Benjamini	FDR
UP_SEQ_FEATURE	repeat:ANK 3	4	0.505242	CAMTA1, NOTCH1, CDKN2B, ANKRA2	1	1	99.9983									Annotation Cluster 105	Enrichment Score: 0.17479497246520084
UP_SEQ_FEATURE	repeat:ANK 2	4	0.631566	CAMTA1, NOTCH1, CDKN2B, ANKRA2	1	1	100									Category	Term	Count	PValue	Genes	Bonferroni	Benjamini	FDR
SP_PIR_KEYWORDS	ank repeat	4	0.641595	CAMTA1, NOTCH1, CDKN2B, ANKRA2	1	0.980656	99.9999									GOTERM_BP_FAT	GO:0065004~protein-DNA complex assembly	3	0.434314	RSF1, HIST1H1C, CENPF	1	0.980566	99.9938
INTERPRO	IPR002110:Ankyrin	4	0.679268	CAMTA1, NOTCH1, CDKN2B, ANKRA2	1	0.999996	100									GOTERM_BP_FAT	GO:0034621~cellular macromolecular complex subunit organization	6	0.749573	CTTNBP2, GFM2, RSF1, HIST1H1C, CENPF, GHSR	1	0.999063	100
SMART	SM00248:ANK	4	0.804214	CAMTA1, NOTCH1, CDKN2B, ANKRA2	1	0.999952	100									GOTERM_BP_FAT	GO:0034622~cellular macromolecular complex assembly	4	0.918328	CTTNBP2, RSF1, HIST1H1C, CENPF	1	0.99999	100
UP_SEQ_FEATURE	repeat:ANK 1	3	0.835637	CAMTA1, NOTCH1, ANKRA2	1	1	100
																Annotation Cluster 106	Enrichment Score: 0.1739440569276921
Annotation Cluster 94	Enrichment Score: 0.16071676491765183															Category	Term	Count	PValue	Genes	Bonferroni	Benjamini	FDR
Category	Term	Count	PValue	Genes	Bonferroni	Benjamini	FDR									SP_PIR_KEYWORDS	ligase	6	0.519899	IARS, BTRC, UBE2W, SH3RF2, RNF149, RNF111	1	0.992258	99.9949
SP_PIR_KEYWORDS	DNA damage	5	0.428996	CCND1, SHPRH, BAZ1B, GTF2H4, APEX1	1	0.944222	99.9377									SP_PIR_KEYWORDS	ubl conjugation pathway	9	0.520809	ATG12, BTRC, UBE2W, SH3RF2, MALT1, RNF149, ATG3, RNF111, USP44	1	0.991556	99.9951
GOTERM_BP_FAT	GO:0006974~response to DNA damage stimulus	6	0.758233	CCND1, SHPRH, BAZ1B, RBM4, GTF2H4, APEX1	1	0.998733	100									GOTERM_BP_FAT	GO:0006508~proteolysis	17	0.523563	SEC11C, ATG12, MMP9, BTRC, MALT1, F7, ATG3, XPNPEP1, CRBN, PSMA3, UBE2W, SH3RF2, CTSC, RNF149, PCSK5, USP44, RNF111	1	0.989543	99.9997
SP_PIR_KEYWORDS	dna repair	3	0.811784	SHPRH, GTF2H4, APEX1	1	0.995017	100									GOTERM_BP_FAT	GO:0043632~modification-dependent macromolecule catabolic process	10	0.677092	ATG12, BTRC, PSMA3, UBE2W, SH3RF2, MALT1, RNF149, ATG3, RNF111, USP44	1	0.997863	100
GOTERM_BP_FAT	GO:0006281~DNA repair	4	0.86186	SHPRH, RBM4, GTF2H4, APEX1	1	0.999837	100									GOTERM_BP_FAT	GO:0019941~modification-dependent protein catabolic process	10	0.677092	ATG12, BTRC, PSMA3, UBE2W, SH3RF2, MALT1, RNF149, ATG3, RNF111, USP44	1	0.997863	100
																GOTERM_BP_FAT	GO:0051603~proteolysis involved in cellular protein catabolic process	10	0.72238	ATG12, BTRC, PSMA3, UBE2W, SH3RF2, MALT1, RNF149, ATG3, RNF111, USP44	1	0.998687	100
Annotation Cluster 95	Enrichment Score: 0.15709868820502476															GOTERM_BP_FAT	GO:0044257~cellular protein catabolic process	10	0.726469	ATG12, BTRC, PSMA3, UBE2W, SH3RF2, MALT1, RNF149, ATG3, RNF111, USP44	1	0.998738	100
Category	Term	Count	PValue	Genes	Bonferroni	Benjamini	FDR									GOTERM_BP_FAT	GO:0030163~protein catabolic process	10	0.759627	ATG12, BTRC, PSMA3, UBE2W, SH3RF2, MALT1, RNF149, ATG3, RNF111, USP44	1	0.999159	100
SP_PIR_KEYWORDS	potassium	3	0.581838	MAT2A, KCNF1, ACAT1	1	0.972852	99.999									GOTERM_BP_FAT	GO:0044265~cellular macromolecule catabolic process	11	0.813161	DCPS, ATG12, BTRC, PSMA3, UBE2W, SH3RF2, MALT1, RNF149, ATG3, RNF111, USP44	1	0.999687	100
GOTERM_MF_FAT	GO:0030955~potassium ion binding	3	0.66293	MAT2A, KCNF1, ACAT1	1	0.997493	100									GOTERM_BP_FAT	GO:0009057~macromolecule catabolic process	11	0.864846	DCPS, ATG12, BTRC, PSMA3, UBE2W, SH3RF2, MALT1, RNF149, ATG3, RNF111, USP44	1	0.999925	100
GOTERM_MF_FAT	GO:0031420~alkali metal ion binding	3	0.875859	MAT2A, KCNF1, ACAT1	1	0.999845	100
																Annotation Cluster 107	Enrichment Score: 0.16920941234410491
Annotation Cluster 96	Enrichment Score: 0.15699111911815813															Category	Term	Count	PValue	Genes	Bonferroni	Benjamini	FDR
Category	Term	Count	PValue	Genes	Bonferroni	Benjamini	FDR									SP_PIR_KEYWORDS	transferase	25	0.262483	BCAT2, PRPF4B, STK35, RNGTT, CDYL, LMTK2, MOS, PIGC, NAT10, LIPT1, INSR, AGPAT3, MAP2K7, LIMK2, POLR1A, DGUOK, PRKCE, METT10D, PAPOLB, LRAT, JAK2, POFUT2, CARM1, HS3ST3B1, ACAA1	1	0.964514	98.3505
GOTERM_BP_FAT	GO:0033365~protein localization in organelle	5	0.206275	TSPO, COG7, PAX6, TNPO1, GLI3	1	0.836203	98.0023									INTERPRO	IPR017441:Protein kinase, ATP binding site	10	0.330796	PRPF4B, LIMK2, STK35, MOS, LMTK2, JAK2, EVI5L, PRKCE, MAP2K7, INSR	1	0.999995	99.7011
GOTERM_BP_FAT	GO:0006913~nucleocytoplasmic transport	4	0.4588	RBM15B, NUP107, TNPO1, GLI3	1	0.972513	99.997									GOTERM_BP_FAT	GO:0006793~phosphorus metabolic process	19	0.401736	PTPRK, PPP6C, ERG, PRPF4B, LIMK2, PTPRG, SMAD7, STK35, DGUOK, PRKCE, RNGTT, CTTNBP2, PPP2CA, MOS, LMTK2, JAK2, MAP2K7, INSR, ATP5H	1	0.975097	99.984
GOTERM_BP_FAT	GO:0051169~nuclear transport	4	0.463547	RBM15B, NUP107, TNPO1, GLI3	1	0.973259	99.9974									GOTERM_BP_FAT	GO:0006796~phosphate metabolic process	19	0.401736	PTPRK, PPP6C, ERG, PRPF4B, LIMK2, PTPRG, SMAD7, STK35, DGUOK, PRKCE, RNGTT, CTTNBP2, PPP2CA, MOS, LMTK2, JAK2, MAP2K7, INSR, ATP5H	1	0.975097	99.984
GOTERM_BP_FAT	GO:0017038~protein import	3	0.624674	TSPO, TNPO1, GLI3	1	0.992999	100									UP_SEQ_FEATURE	binding site:ATP	10	0.470251	IARS, PRPF4B, LIMK2, STK35, MOS, LMTK2, JAK2, PRKCE, MAP2K7, INSR	1	1	99.9946
GOTERM_BP_FAT	GO:0046907~intracellular transport	10	0.764499	TSPO, COG7, BCL2, RBM15B, PCSK9, NUP107, TNPO1, GLI3, APBA1, ATP7B	1	0.998839	100									GOTERM_BP_FAT	GO:0006468~protein amino acid phosphorylation	13	0.485771	ERG, PRPF4B, LIMK2, SMAD7, STK35, DGUOK, PRKCE, CTTNBP2, LMTK2, MOS, JAK2, INSR, MAP2K7	1	0.985914	99.9988
GOTERM_BP_FAT	GO:0034613~cellular protein localization	6	0.809461	TSPO, COG7, PAX6, TNPO1, GLI3, APBA1	1	0.999493	100									INTERPRO	IPR000719:Protein kinase, core	9	0.517484	PRPF4B, LIMK2, STK35, MOS, LMTK2, JAK2, PRKCE, MAP2K7, INSR	1	0.999995	99.9974
GOTERM_BP_FAT	GO:0070727~cellular macromolecule localization	6	0.81499	TSPO, COG7, PAX6, TNPO1, GLI3, APBA1	1	0.999539	100									UP_SEQ_FEATURE	active site:Proton acceptor	11	0.539394	PRPF4B, STK35, MOS, LMTK2, JAK2, PRKCE, MAP2K7, INSR, APEX1, HPGD, ACAA1	1	1	99.9994
GOTERM_BP_FAT	GO:0006886~intracellular protein transport	5	0.865707	TSPO, COG7, TNPO1, GLI3, APBA1	1	0.999853	100									SP_PIR_KEYWORDS	serine/threonine-protein kinase	7	0.560979	PRPF4B, LIMK2, STK35, MOS, LMTK2, PRKCE, MAP2K7	1	0.993489	99.9985
GOTERM_BP_FAT	GO:0006605~protein targeting	3	0.867753	TSPO, TNPO1, GLI3	1	0.999859	100									GOTERM_MF_FAT	GO:0004672~protein kinase activity	11	0.587071	CTTNBP2, PRPF4B, LIMK2, PRKAG2, STK35, MOS, LMTK2, JAK2, PRKCE, MAP2K7, INSR	1	0.997408	99.9996
SP_PIR_KEYWORDS	protein transport	5	0.953923	COG7, NUP107, SFT2D3, TNPO1, APBA1	1	0.999827	100									UP_SEQ_FEATURE	domain:Protein kinase	8	0.603253	PRPF4B, LIMK2, STK35, MOS, LMTK2, PRKCE, MAP2K7, INSR	1	1	99.9999
GOTERM_BP_FAT	GO:0008104~protein localization	10	0.956934	TSPO, SHROOM3, COG7, PAX6, ITGA2, NUP107, SFT2D3, TNPO1, GLI3, APBA1	1	0.999998	100									GOTERM_MF_FAT	GO:0004674~protein serine/threonine kinase activity	8	0.612136	PRPF4B, LIMK2, PRKAG2, STK35, MOS, LMTK2, PRKCE, MAP2K7	1	0.997697	99.9998
GOTERM_BP_FAT	GO:0045184~establishment of protein localization	8	0.972165	TSPO, COG7, ITGA2, NUP107, SFT2D3, TNPO1, GLI3, APBA1	1	1	100									GOTERM_BP_FAT	GO:0016310~phosphorylation	14	0.613241	ERG, PRPF4B, LIMK2, SMAD7, STK35, DGUOK, PRKCE, CTTNBP2, LMTK2, MOS, JAK2, MAP2K7, ATP5H, INSR	1	0.995813	100
GOTERM_BP_FAT	GO:0015031~protein transport	7	0.987804	TSPO, COG7, NUP107, SFT2D3, TNPO1, GLI3, APBA1	1	1	100									SP_PIR_KEYWORDS	kinase	11	0.641916	CDKN1B, PRPF4B, LIMK2, STK35, MOS, LMTK2, JAK2, DGUOK, PRKCE, MAP2K7, INSR	1	0.99527	99.9999
																INTERPRO	IPR008271:Serine/threonine protein kinase, active site	6	0.701759	PRPF4B, LIMK2, STK35, MOS, PRKCE, MAP2K7	1	0.999989	100
Annotation Cluster 97	Enrichment Score: 0.15435106113097033															INTERPRO	IPR017442:Serine/threonine protein kinase-related	6	0.709343	PRPF4B, LIMK2, STK35, MOS, PRKCE, MAP2K7	1	0.999989	100
Category	Term	Count	PValue	Genes	Bonferroni	Benjamini	FDR									UP_SEQ_FEATURE	nucleotide phosphate-binding region:ATP	13	0.810049	PRPF4B, LIMK2, BLM, STK35, DGUOK, PRKCE, LMTK2, MOS, NAT10, JAK2, SMARCA2, INSR, MAP2K7	1	1	100
GOTERM_CC_FAT	GO:0030141~secretory granule	3	0.586164	NOTCH1, ITGA2B, FN1	1	0.988252	99.9991									SP_PIR_KEYWORDS	nucleotide-binding	22	0.844897	PRPF4B, LIMK2, BLM, STK35, DGUOK, PRKCE, RNGTT, IARS, PAPOLB, GFM2, MOS, RAB14, LMTK2, UBE2W, GNAS, JAK2, RAB12, NAT10, MAP2K7, INSR, SMARCA2, NKIRAS2	1	0.999336	100
GOTERM_CC_FAT	GO:0031982~vesicle	9	0.674527	ARHGAP21, NOTCH1, VAPA, HSPA5, CD2AP, APBA1, ATP7B, ITGA2B, FN1	1	0.995282	100									SP_PIR_KEYWORDS	atp-binding	16	0.908084	PRPF4B, LIMK2, BLM, STK35, DGUOK, PRKCE, IARS, PAPOLB, LMTK2, MOS, UBE2W, NAT10, JAK2, MAP2K7, INSR, SMARCA2	1	0.999689	100
GOTERM_CC_FAT	GO:0016023~cytoplasmic membrane-bounded vesicle	7	0.736354	NOTCH1, HSPA5, CD2AP, APBA1, ATP7B, ITGA2B, FN1	1	0.995889	100									INTERPRO	IPR002290:Serine/threonine protein kinase	3	0.930422	PRPF4B, PRKCE, MAP2K7	1	1	100
GOTERM_CC_FAT	GO:0031410~cytoplasmic vesicle	8	0.757979	ARHGAP21, NOTCH1, HSPA5, CD2AP, APBA1, ATP7B, ITGA2B, FN1	1	0.996848	100									GOTERM_MF_FAT	GO:0032553~ribonucleotide binding	24	0.932384	PRPF4B, LIMK2, BLM, PRKAG2, STK35, DGUOK, PRKCE, RNGTT, IARS, PAPOLB, GFM2, MOS, SLFN12, RAB14, LMTK2, UBE2W, GNAS, JAK2, RAB12, NAT10, MAP2K7, INSR, SMARCA2, NKIRAS2	1	0.999994	100
GOTERM_CC_FAT	GO:0031988~membrane-bounded vesicle	7	0.766447	NOTCH1, HSPA5, CD2AP, APBA1, ATP7B, ITGA2B, FN1	1	0.996487	100									GOTERM_MF_FAT	GO:0032555~purine ribonucleotide binding	24	0.932384	PRPF4B, LIMK2, BLM, PRKAG2, STK35, DGUOK, PRKCE, RNGTT, IARS, PAPOLB, GFM2, MOS, SLFN12, RAB14, LMTK2, UBE2W, GNAS, JAK2, RAB12, NAT10, MAP2K7, INSR, SMARCA2, NKIRAS2	1	0.999994	100
																GOTERM_MF_FAT	GO:0000166~nucleotide binding	29	0.957977	PRPF4B, BLM, PRKAG2, STK35, HNRPLL, RNGTT, IARS, GFM2, LMTK2, MOS, NAT10, DND1, MAP2K7, INSR, LIMK2, NOL8, ELAVL2, DGUOK, PRKCE, PAPOLB, SLFN12, RAB14, UBE2W, GNAS, JAK2, RAB12, SMARCA2, HPGD, NKIRAS2	1	0.999999	100
Annotation Cluster 98	Enrichment Score: 0.14871420684367093															GOTERM_MF_FAT	GO:0017076~purine nucleotide binding	24	0.958849	PRPF4B, LIMK2, BLM, PRKAG2, STK35, DGUOK, PRKCE, RNGTT, IARS, PAPOLB, GFM2, MOS, SLFN12, RAB14, LMTK2, UBE2W, GNAS, JAK2, RAB12, NAT10, MAP2K7, INSR, SMARCA2, NKIRAS2	1	0.999999	100
Category	Term	Count	PValue	Genes	Bonferroni	Benjamini	FDR									GOTERM_MF_FAT	GO:0005524~ATP binding	18	0.959505	PRPF4B, LIMK2, BLM, PRKAG2, STK35, DGUOK, PRKCE, IARS, PAPOLB, SLFN12, LMTK2, MOS, UBE2W, NAT10, JAK2, MAP2K7, INSR, SMARCA2	1	0.999999	100
GOTERM_CC_FAT	GO:0044420~extracellular matrix part	3	0.423703	COL6A1, MMRN2, FN1	1	0.964253	99.9293									GOTERM_MF_FAT	GO:0032559~adenyl ribonucleotide binding	18	0.965602	PRPF4B, LIMK2, BLM, PRKAG2, STK35, DGUOK, PRKCE, IARS, PAPOLB, SLFN12, LMTK2, MOS, UBE2W, NAT10, JAK2, MAP2K7, INSR, SMARCA2	1	0.999999	100
GOTERM_CC_FAT	GO:0005578~proteinaceous extracellular matrix	4	0.732015	PTPRZ1, COL6A1, MMRN2, FN1	1	0.996289	100									SMART	SM00220:S_TKc	3	0.969022	PRPF4B, PRKCE, MAP2K7	1	1	100
GOTERM_CC_FAT	GO:0031012~extracellular matrix	4	0.785964	PTPRZ1, COL6A1, MMRN2, FN1	1	0.997044	100									GOTERM_MF_FAT	GO:0030554~adenyl nucleotide binding	18	0.980831	PRPF4B, LIMK2, BLM, PRKAG2, STK35, DGUOK, PRKCE, IARS, PAPOLB, SLFN12, LMTK2, MOS, UBE2W, NAT10, JAK2, MAP2K7, INSR, SMARCA2	1	1	100
SP_PIR_KEYWORDS	extracellular matrix	3	0.796308	COL6A1, MMRN2, FN1	1	0.994322	100									GOTERM_MF_FAT	GO:0001883~purine nucleoside binding	18	0.983811	PRPF4B, LIMK2, BLM, PRKAG2, STK35, DGUOK, PRKCE, IARS, PAPOLB, SLFN12, LMTK2, MOS, UBE2W, NAT10, JAK2, MAP2K7, INSR, SMARCA2	1	1	100
GOTERM_CC_FAT	GO:0044421~extracellular region part	7	0.929746	ICAM1, PTPRZ1, PCSK9, COL6A1, NENF, MMRN2, FN1	1	0.999728	100									GOTERM_MF_FAT	GO:0001882~nucleoside binding	18	0.984852	PRPF4B, LIMK2, BLM, PRKAG2, STK35, DGUOK, PRKCE, IARS, PAPOLB, SLFN12, LMTK2, MOS, UBE2W, NAT10, JAK2, MAP2K7, INSR, SMARCA2	1	1	100
Annotation Cluster 99	Enrichment Score: 0.1244326686654277															Annotation Cluster 108	Enrichment Score: 0.16371936866363193
Category	Term	Count	PValue	Genes	Bonferroni	Benjamini	FDR									Category	Term	Count	PValue	Genes	Bonferroni	Benjamini	FDR
INTERPRO	IPR013783:Immunoglobulin-like fold	6	0.584592	ICAM1, BTNL9, FGFRL1, LRRN1, ROR2, NFATC1	1	0.999972	99.9997									GOTERM_BP_FAT	GO:0019318~hexose metabolic process	4	0.623574	ATF3, PRKAG2, POFUT2, SERP1	1	0.996158	100
INTERPRO	IPR013098:Immunoglobulin I-set	3	0.629961	FGFRL1, LRRN1, ROR2	1	0.999991	99.9999									GOTERM_BP_FAT	GO:0006006~glucose metabolic process	3	0.7114	ATF3, PRKAG2, SERP1	1	0.998481	100
SP_PIR_KEYWORDS	Immunoglobulin domain	5	0.669158	ICAM1, BTNL9, FGFRL1, LRRN1, ROR2	1	0.982159	100									GOTERM_BP_FAT	GO:0005996~monosaccharide metabolic process	4	0.727512	ATF3, PRKAG2, POFUT2, SERP1	1	0.998739	100
INTERPRO	IPR003598:Immunoglobulin subtype 2	3	0.740274	FGFRL1, LRRN1, ROR2	1	0.999999	100
SMART	SM00408:IGc2	3	0.835323	FGFRL1, LRRN1, ROR2	1	0.999956	100									Annotation Cluster 109	Enrichment Score: 0.15440294889610126
INTERPRO	IPR003599:Immunoglobulin subtype	3	0.847298	ICAM1, BTNL9, FGFRL1	1	1	100									Category	Term	Count	PValue	Genes	Bonferroni	Benjamini	FDR
INTERPRO	IPR007110:Immunoglobulin-like	4	0.853074	BTNL9, FGFRL1, LRRN1, ROR2	1	1	100									GOTERM_CC_FAT	GO:0042175~nuclear envelope-endoplasmic reticulum network	5	0.529986	SEC11C, RAB14, PIGC, ELOVL6, CYP2E1	1	0.984493	99.9958
SMART	SM00409:IG	3	0.917432	ICAM1, BTNL9, FGFRL1	1	0.999997	100									GOTERM_CC_FAT	GO:0005783~endoplasmic reticulum	14	0.589099	SEC11C, CYP2E1, GPRC5A, KCNIP3, LRAT, ANK1, RAB14, PIGC, POFUT2, CTSC, ELOVL6, APEX1, AGPAT3, SERP1	1	0.984098	99.9993
																GOTERM_CC_FAT	GO:0012505~endomembrane system	11	0.698608	CTTNBP2, CLTB, SEC11C, LEMD2, RAB14, CENPF, PIGC, GNAS, ELOVL6, CYP2E1, COPE	1	0.993015	100
Annotation Cluster 100	Enrichment Score: 0.10948777082875973															GOTERM_CC_FAT	GO:0005789~endoplasmic reticulum membrane	4	0.703135	SEC11C, PIGC, ELOVL6, CYP2E1	1	0.992484	100
Category	Term	Count	PValue	Genes	Bonferroni	Benjamini	FDR									GOTERM_CC_FAT	GO:0044432~endoplasmic reticulum part	4	0.852019	SEC11C, PIGC, ELOVL6, CYP2E1	1	0.998862	100
GOTERM_BP_FAT	GO:0006006~glucose metabolic process	3	0.674041	IRS2, PPP1CC, MYC	1	0.995858	100									SP_PIR_KEYWORDS	endoplasmic reticulum	8	0.906583	LRAT, SEC11C, PIGC, POFUT2, ELOVL6, CYP2E1, KCNIP3, SERP1	1	0.999698	100
GOTERM_BP_FAT	GO:0019318~hexose metabolic process	3	0.802517	IRS2, PPP1CC, MYC	1	0.999426	100
GOTERM_BP_FAT	GO:0005996~monosaccharide metabolic process	3	0.867753	IRS2, PPP1CC, MYC	1	0.999859	100									Annotation Cluster 110	Enrichment Score: 0.139772649123399
																Category	Term	Count	PValue	Genes	Bonferroni	Benjamini	FDR
Annotation Cluster 101	Enrichment Score: 0.09990746633241035															SP_PIR_KEYWORDS	receptor	15	0.488963	PTPRK, TRPM8, PTPRG, CD247, GRIN1, NR4A2, ITGB5, NPR3, GPRC5A, AGTR1, IGSF11, GHSR, NR2F2, ERRFI1, INSR	1	0.992185	99.9883
Category	Term	Count	PValue	Genes	Bonferroni	Benjamini	FDR									SP_PIR_KEYWORDS	transmembrane protein	8	0.609705	AGTR1, PTPRG, GRIN1, CD247, ITGB5, CYP2E1, NPR3, INSR	1	0.994747	99.9997
GOTERM_MF_FAT	GO:0000166~nucleotide binding	39	0.524735	NARS, RP2, U2AF2, RBM15B, FKBP4, RBM4, TUBB2C, IGF2BP3, DAZAP1, IARS, MAP3K5, SFRS5, RAB28, LACE1, MAP3K8, LMTK2, ABCD4, HSPA5, DYNC1H1, AKT3, RAP2B, SHPRH, CSTF2, MAT2A, SF3B14, DOCK9, SACS, SSB, RASL12, MCM6, ATP2C2, NAV1, BAZ1B, RAP1A, ROR2, RNPC3, EP400, ATP7B, MAP3K11	1	0.996278	99.9968									GOTERM_CC_FAT	GO:0005887~integral to plasma membrane	10	0.958323	PTPRK, AGTR1, KCND2, PTPRG, KCNA2, GRIN1, ITGB5, INSR, GPRC5A, HS3ST3B1	1	0.999976	100
SP_PIR_KEYWORDS	nucleotide-binding	24	0.716168	RAP2B, SHPRH, NARS, MAT2A, TUBB2C, RASL12, MCM6, IARS, MAP3K5, ATP2C2, BAZ1B, LACE1, RAB28, MAP3K8, LMTK2, ROR2, RAP1A, ABCD4, HSPA5, DYNC1H1, AKT3, EP400, ATP7B, MAP3K11	1	0.987818	100									GOTERM_CC_FAT	GO:0031226~intrinsic to plasma membrane	10	0.966054	PTPRK, AGTR1, KCND2, PTPRG, KCNA2, GRIN1, ITGB5, INSR, GPRC5A, HS3ST3B1	1	0.999985	100
SP_PIR_KEYWORDS	atp-binding	19	0.717637	SHPRH, NARS, MAT2A, MCM6, IARS, MAP3K5, ATP2C2, BAZ1B, LACE1, MAP3K8, LMTK2, ROR2, ABCD4, HSPA5, DYNC1H1, AKT3, EP400, ATP7B, MAP3K11	1	0.987348	100
UP_SEQ_FEATURE	binding site:ATP	8	0.741899	IARS, MAP3K5, MAT2A, MAP3K8, LMTK2, ROR2, AKT3, MAP3K11	1	1	100									Annotation Cluster 111	Enrichment Score: 0.1344829133879186
GOTERM_MF_FAT	GO:0032555~purine ribonucleotide binding	28	0.804815	NARS, RP2, FKBP4, TUBB2C, IARS, MAP3K5, RAB28, LACE1, MAP3K8, LMTK2, ABCD4, HSPA5, DYNC1H1, AKT3, RAP2B, SHPRH, MAT2A, DOCK9, SACS, RASL12, MCM6, ATP2C2, BAZ1B, RAP1A, ROR2, EP400, ATP7B, MAP3K11	1	0.999546	100									Category	Term	Count	PValue	Genes	Bonferroni	Benjamini	FDR
GOTERM_MF_FAT	GO:0032553~ribonucleotide binding	28	0.804815	NARS, RP2, FKBP4, TUBB2C, IARS, MAP3K5, RAB28, LACE1, MAP3K8, LMTK2, ABCD4, HSPA5, DYNC1H1, AKT3, RAP2B, SHPRH, MAT2A, DOCK9, SACS, RASL12, MCM6, ATP2C2, BAZ1B, RAP1A, ROR2, EP400, ATP7B, MAP3K11	1	0.999546	100									GOTERM_BP_FAT	GO:0045321~leukocyte activation	4	0.663519	CPLX2, BLM, MALT1, IMPDH1	1	0.997555	100
UP_SEQ_FEATURE	nucleotide phosphate-binding region:ATP	13	0.810049	SHPRH, MAT2A, MCM6, MAP3K5, LACE1, MAP3K8, LMTK2, ROR2, ABCD4, DYNC1H1, EP400, AKT3, MAP3K11	1	1	100									GOTERM_BP_FAT	GO:0001775~cell activation	4	0.752746	CPLX2, BLM, MALT1, IMPDH1	1	0.999104	100
GOTERM_MF_FAT	GO:0005524~ATP binding	22	0.837914	SHPRH, NARS, MAT2A, FKBP4, RP2, SACS, MCM6, IARS, MAP3K5, ATP2C2, BAZ1B, LACE1, MAP3K8, LMTK2, ROR2, ABCD4, HSPA5, DYNC1H1, AKT3, EP400, ATP7B, MAP3K11	1	0.999719	100									GOTERM_BP_FAT	GO:0046649~lymphocyte activation	3	0.790768	BLM, MALT1, IMPDH1	1	0.999512	100
GOTERM_MF_FAT	GO:0032559~adenyl ribonucleotide binding	22	0.856326	SHPRH, NARS, MAT2A, FKBP4, RP2, SACS, MCM6, IARS, MAP3K5, ATP2C2, BAZ1B, LACE1, MAP3K8, LMTK2, ROR2, ABCD4, HSPA5, DYNC1H1, AKT3, EP400, ATP7B, MAP3K11	1	0.999801	100
GOTERM_MF_FAT	GO:0017076~purine nucleotide binding	28	0.866783	NARS, RP2, FKBP4, TUBB2C, IARS, MAP3K5, RAB28, LACE1, MAP3K8, LMTK2, ABCD4, HSPA5, DYNC1H1, AKT3, RAP2B, SHPRH, MAT2A, DOCK9, SACS, RASL12, MCM6, ATP2C2, BAZ1B, RAP1A, ROR2, EP400, ATP7B, MAP3K11	1	0.99981	100									Annotation Cluster 112	Enrichment Score: 0.13337900696248592
GOTERM_MF_FAT	GO:0030554~adenyl nucleotide binding	22	0.907616	SHPRH, NARS, MAT2A, FKBP4, RP2, SACS, MCM6, IARS, MAP3K5, ATP2C2, BAZ1B, LACE1, MAP3K8, LMTK2, ROR2, ABCD4, HSPA5, DYNC1H1, AKT3, EP400, ATP7B, MAP3K11	1	0.999939	100									Category	Term	Count	PValue	Genes	Bonferroni	Benjamini	FDR
GOTERM_MF_FAT	GO:0001883~purine nucleoside binding	22	0.918886	SHPRH, NARS, MAT2A, FKBP4, RP2, SACS, MCM6, IARS, MAP3K5, ATP2C2, BAZ1B, LACE1, MAP3K8, LMTK2, ROR2, ABCD4, HSPA5, DYNC1H1, AKT3, EP400, ATP7B, MAP3K11	1	0.99996	100									GOTERM_BP_FAT	GO:0034504~protein localization in nucleus	3	0.486559	JUN, SUPT7L, JAK2	1	0.985632	99.9988
GOTERM_MF_FAT	GO:0001882~nucleoside binding	22	0.922957	SHPRH, NARS, MAT2A, FKBP4, RP2, SACS, MCM6, IARS, MAP3K5, ATP2C2, BAZ1B, LACE1, MAP3K8, LMTK2, ROR2, ABCD4, HSPA5, DYNC1H1, AKT3, EP400, ATP7B, MAP3K11	1	0.999964	100									GOTERM_BP_FAT	GO:0008104~protein localization	15	0.690914	PTPRK, ARFGAP3, CLTB, CENPF, ATG3, JUN, YWHAQ, RAB14, RAB12, SUPT7L, JAK2, GNAS, PCSK5, COPE, SERP1	1	0.998151	100
																GOTERM_BP_FAT	GO:0015031~protein transport	13	0.69511	ARFGAP3, CLTB, CENPF, ATG3, JUN, RAB14, YWHAQ, RAB12, JAK2, GNAS, PCSK5, COPE, SERP1	1	0.998217	100
Annotation Cluster 102	Enrichment Score: 0.0877706976071566															GOTERM_BP_FAT	GO:0045184~establishment of protein localization	13	0.706517	ARFGAP3, CLTB, CENPF, ATG3, JUN, RAB14, YWHAQ, RAB12, JAK2, GNAS, PCSK5, COPE, SERP1	1	0.998431	100
Category	Term	Count	PValue	Genes	Bonferroni	Benjamini	FDR									GOTERM_BP_FAT	GO:0033365~protein localization in organelle	3	0.719539	JUN, SUPT7L, JAK2	1	0.998642	100
UP_SEQ_FEATURE	topological domain:Extracellular	29	0.501917	FGFRL1, GABBR2, GPR88, TTYH3, TSPAN33, ADRA2A, FAS, ICAM1, BTNL9, VANGL1, PTPRZ1, GPR135, ITGA2, C18ORF1, GJB2, NOTCH1, ATP2C2, SEMA6C, LAYN, PLXDC2, LRRN1, ROR2, CHRNB2, ANTXR1, BAMBI, ADAM12, CACNA1D, ATP7B, ITGA2B	1	1	99.9981									GOTERM_BP_FAT	GO:0046907~intracellular transport	11	0.735053	ANKRD27, ARFGAP3, CLTB, JUN, YWHAQ, RAB14, MALT1, GNAS, JAK2, TPM1, COPE	1	0.998887	100
SP_PIR_KEYWORDS	disulfide bond	26	0.699727	FGFRL1, GDNF, MMRN2, TSPAN33, ADRA2A, PCSK9, FAS, FN1, RECK, ICAM1, BTNL9, PNLIPRP2, ITGA2, PPP1CC, C18ORF1, CBLN4, NOTCH1, SEMA6C, LAYN, LRRN1, ROR2, CHRNB2, ADAM12, CACNA1D, HS3ST3B1, ITGA2B	1	0.98672	100									GOTERM_BP_FAT	GO:0034613~cellular protein localization	7	0.735566	PTPRK, ARFGAP3, CLTB, JUN, YWHAQ, SUPT7L, JAK2	1	0.998877	100
UP_SEQ_FEATURE	topological domain:Cytoplasmic	35	0.758563	VAPA, FGFRL1, GABBR2, GPR88, TTYH3, TSPAN33, B3GNT5, ADRA2A, FAS, ICAM1, BTNL9, VANGL1, PTPRZ1, GPR135, ITGA2, SFT2D3, C18ORF1, GJB2, ATP2C2, NOTCH1, SEMA6C, LAYN, FAAH, PLXDC2, LRRN1, KCNF1, ROR2, CHRNB2, ANTXR1, BAMBI, ADAM12, CACNA1D, HS3ST3B1, ATP7B, ITGA2B	1	1	100									GOTERM_BP_FAT	GO:0070727~cellular macromolecule localization	7	0.742604	PTPRK, ARFGAP3, CLTB, JUN, YWHAQ, SUPT7L, JAK2	1	0.998983	100
SP_PIR_KEYWORDS	glycoprotein	44	0.759403	KIAA0195, NXPH2, SLC22A16, FGFRL1, TMEM63A, CTNND2, GABBR2, GPR88, GDNF, MMRN2, STT3B, TTYH3, MLL5, TSPAN33, B3GNT5, LMTK2, ADRA2A, PCSK9, COL6A1, LETMD1, FAS, MYC, FN1, RECK, ICAM1, PNLIPRP2, BTNL9, EPB41, PTPRZ1, ITGA2, CBLN4, NOTCH1, SEMA6C, LAYN, PLXDC2, LRRN1, ROR2, CHRNB2, ANTXR1, BAMBI, ADAM12, CACNA1D, HS3ST3B1, ITGA2B	1	0.991783	100									SP_PIR_KEYWORDS	protein transport	6	0.891501	ARFGAP3, RAB14, RAB12, ATG3, COPE, SERP1	1	0.999673	100
UP_SEQ_FEATURE	disulfide bond	23	0.82312	RECK, ICAM1, PNLIPRP2, BTNL9, FGFRL1, ITGA2, GDNF, C18ORF1, MMRN2, CBLN4, NOTCH1, SEMA6C, LAYN, LRRN1, ADRA2A, PCSK9, ROR2, CHRNB2, FAS, ADAM12, HS3ST3B1, ITGA2B, FN1	1	1	100									GOTERM_BP_FAT	GO:0006605~protein targeting	3	0.892388	JUN, YWHAQ, JAK2	1	0.999972	100
UP_SEQ_FEATURE	glycosylation site:N-linked (GlcNAc...)	40	0.842003	KIAA0195, NXPH2, SLC22A16, FGFRL1, TMEM63A, GABBR2, GPR88, GDNF, MMRN2, STT3B, TTYH3, TSPAN33, B3GNT5, LMTK2, ADRA2A, PCSK9, COL6A1, LETMD1, FAS, FN1, RECK, ICAM1, PNLIPRP2, BTNL9, PTPRZ1, ITGA2, CBLN4, NOTCH1, SEMA6C, LAYN, PLXDC2, LRRN1, ROR2, CHRNB2, ANTXR1, BAMBI, ADAM12, CACNA1D, HS3ST3B1, ITGA2B	1	1	100									GOTERM_BP_FAT	GO:0006886~intracellular protein transport	5	0.898811	ARFGAP3, CLTB, JUN, YWHAQ, JAK2	1	0.999977	100
SP_PIR_KEYWORDS	signal	31	0.868322	NXPH2, FGFRL1, GABBR2, GDNF, MMRN2, LMTK2, COL6A1, PCSK9, HTRA4, HSPA5, FAS, NENF, FN1, RECK, ICAM1, BTNL9, PNLIPRP2, PTPRZ1, ITGA2, CBLN4, NOTCH1, SEMA6C, LAYN, PLXDC2, LRRN1, ROR2, CHRNB2, ANTXR1, BAMBI, ADAM12, ITGA2B	1	0.99705	100
GOTERM_CC_FAT	GO:0016021~integral to membrane	53	0.869151	SLC22A16, TSPO, VAPA, TOLLIP, FGFRL1, GABBR2, GPR88, FAS, MCOLN2, ICAM1, BTNL9, VANGL1, GPR135, ATP2C2, PLXDC2, ROR2, NUP107, ADAM12, CLN8, HS3ST3B1, ITGA2B, KIAA0195, CCDC90B, TMEM63A, STT3B, TTYH3, TSPAN33, B3GNT5, BCL2, LMTK2, ADRA2A, ABCD4, LETMD1, HSPA5, TNPO1, CNNM2, PTPRZ1, ITGA2, SFT2D3, C18ORF1, GJB2, NOTCH1, SEMA6C, LAYN, FAAH, LRRN1, KCNF1, KCTD15, CHRNB2, ANTXR1, BAMBI, CACNA1D, ATP7B	1	0.998508	100									Annotation Cluster 113	Enrichment Score: 0.124557532462086
UP_SEQ_FEATURE	signal peptide	31	0.869542	NXPH2, FGFRL1, GABBR2, GDNF, MMRN2, LMTK2, COL6A1, PCSK9, HTRA4, HSPA5, FAS, NENF, FN1, RECK, ICAM1, BTNL9, PNLIPRP2, PTPRZ1, ITGA2, CBLN4, NOTCH1, SEMA6C, LAYN, PLXDC2, LRRN1, ROR2, CHRNB2, ANTXR1, BAMBI, ADAM12, ITGA2B	1	1	100									Category	Term	Count	PValue	Genes	Bonferroni	Benjamini	FDR
GOTERM_CC_FAT	GO:0031224~intrinsic to membrane	55	0.8805	SLC22A16, TSPO, VAPA, TOLLIP, FGFRL1, GABBR2, GPR88, FAS, MCOLN2, RECK, ICAM1, BTNL9, VANGL1, GPR135, ATP2C2, PLXDC2, ROR2, NUP107, ADAM12, CLN8, HS3ST3B1, ITGA2B, KIAA0195, CCDC90B, TMEM63A, STT3B, TTYH3, TSPAN33, B3GNT5, BCL2, LMTK2, ADRA2A, ABCD4, LETMD1, HSPA5, TNPO1, CNNM2, PTPRZ1, ITGA2, SFT2D3, C18ORF1, GJB2, NOTCH1, SEMA6C, LAYN, FAAH, LRRN1, RAP1A, KCNF1, KCTD15, CHRNB2, ANTXR1, BAMBI, C…	1	0.998792	100									SP_PIR_KEYWORDS	isopeptide bond	6	0.563769	HIST1H1C, ATG12, SMAD7, MAFB, GNAS, TPM1	1	0.993109	99.9986
UP_SEQ_FEATURE	transmembrane region	48	0.960582	KIAA0195, SLC22A16, TSPO, CCDC90B, VAPA, FGFRL1, TMEM63A, GABBR2, GPR88, STT3B, TTYH3, TSPAN33, B3GNT5, BCL2, LMTK2, ADRA2A, ABCD4, LETMD1, MCOLN2, FAS, CNNM2, ICAM1, BTNL9, VANGL1, PTPRZ1, GPR135, ITGA2, SFT2D3, C18ORF1, GJB2, ATP2C2, NOTCH1, SEMA6C, LAYN, FAAH, PLXDC2, LRRN1, ROR2, KCNF1, CHRNB2, ANTXR1, BAMBI, ADAM12, CLN8, CACNA1D, HS3ST3B1, ATP7B, ITGA2B	1	1	100									UP_SEQ_FEATURE	cross-link:Glycyl lysine isopeptide (Lys-Gly) (interchain with G-Cter in ubiquitin)	3	0.828893	HIST1H1C, GNAS, TPM1	1	1	100
SP_PIR_KEYWORDS	transmembrane	48	0.9631	KIAA0195, SLC22A16, TSPO, CCDC90B, VAPA, FGFRL1, TMEM63A, GABBR2, GPR88, STT3B, TTYH3, TSPAN33, B3GNT5, BCL2, LMTK2, ADRA2A, ABCD4, LETMD1, MCOLN2, FAS, CNNM2, ICAM1, BTNL9, VANGL1, PTPRZ1, GPR135, ITGA2, SFT2D3, C18ORF1, GJB2, ATP2C2, NOTCH1, SEMA6C, LAYN, FAAH, PLXDC2, LRRN1, ROR2, KCNF1, CHRNB2, ANTXR1, BAMBI, ADAM12, CLN8, CACNA1D, HS3ST3B1, ATP7B, ITGA2B	1	0.999888	100									SP_PIR_KEYWORDS	ubl conjugation	7	0.905165	CDKN1B, HIST1H1C, SMAD7, MAFB, GNAS, SUPT7L, TPM1	1	0.999734	100
SP_PIR_KEYWORDS	membrane	66	0.964224	SLC22A16, TSPO, UQCRC1, VAPA, RP2, FGFRL1, GABBR2, GPR88, ARHGAP21, SPRY2, GAB2, RAB28, FAS, MCOLN2, AKT3, RAP2B, IRS4, RECK, ICAM1, BTNL9, VANGL1, ANKRA2, GPR135, LPIN1, ATP2C2, PLXDC2, ROR2, ADAM12, CLN8, HS3ST3B1, ITGA2B, KIAA0195, CCDC90B, TMEM63A, STT3B, TTYH3, TSPAN33, B3GNT5, BCL2, LMTK2, ADRA2A, LETMD1, ABCD4, CNNM2, PTPRZ1, DOCK9, BFSP1, ITGA2, GAS2, SFT2D3, C18ORF1, GJB2, NOTCH1, SEMA6C…	1	0.999887	100
																Annotation Cluster 114	Enrichment Score: 0.1104663254966173
Annotation Cluster 103	Enrichment Score: 0.08371234238100107															Category	Term	Count	PValue	Genes	Bonferroni	Benjamini	FDR
Category	Term	Count	PValue	Genes	Bonferroni	Benjamini	FDR									SP_PIR_KEYWORDS	cell adhesion	6	0.669106	LAMA2, IGSF11, CDH13, PCDHGA8, ITGB5, PCDHGA2	1	0.994748	100
SP_PIR_KEYWORDS	transducer	6	0.58795	IRS4, IRS2, GPR135, ADRA2A, GABBR2, GPR88	1	0.971546	99.9992									GOTERM_BP_FAT	GO:0022610~biological adhesion	9	0.834744	SEMA5A, LAMA2, PTPRK, IGSF11, CDH13, C21ORF29, PCDHGA8, ITGB5, PCDHGA2	1	0.999819	100
SP_PIR_KEYWORDS	g-protein coupled receptor	4	0.811946	GPR135, ADRA2A, GABBR2, GPR88	1	0.994719	100									GOTERM_BP_FAT	GO:0007155~cell adhesion	9	0.834744	SEMA5A, LAMA2, PTPRK, IGSF11, CDH13, C21ORF29, PCDHGA8, ITGB5, PCDHGA2	1	0.999819	100
INTERPRO	IPR017452:GPCR, rhodopsin-like superfamily	3	0.867893	GPR135, ADRA2A, GPR88	1	1	100
INTERPRO	IPR000276:7TM GPCR, rhodopsin-like	3	0.875396	GPR135, ADRA2A, GPR88	1	1	100									Annotation Cluster 115	Enrichment Score: 0.0851029015403758
PIR_SUPERFAMILY	PIRSF800006:rhodopsin-like G protein-coupled receptors	3	0.896965	GPR135, ADRA2A, GPR88	1	1	100									Category	Term	Count	PValue	Genes	Bonferroni	Benjamini	FDR
GOTERM_BP_FAT	GO:0007186~G-protein coupled receptor protein signaling pathway	5	0.966968	NXPH2, GPR135, ADRA2A, GABBR2, GPR88	1	0.999999	100									SP_PIR_KEYWORDS	ligase	6	0.519899	IARS, BTRC, UBE2W, SH3RF2, RNF149, RNF111	1	0.992258	99.9949
																INTERPRO	IPR018957:Zinc finger, C3HC4 RING-type	3	0.855408	SH3RF2, RNF149, RNF111	1	1	100
Annotation Cluster 104	Enrichment Score: 0.08038862463314815															INTERPRO	IPR017907:Zinc finger, RING-type, conserved site	3	0.922746	SH3RF2, RNF149, RNF111	1	1	100
Category	Term	Count	PValue	Genes	Bonferroni	Benjamini	FDR									INTERPRO	IPR001841:Zinc finger, RING-type	3	0.939238	SH3RF2, RNF149, RNF111	1	1	100
GOTERM_CC_FAT	GO:0045202~synapse	5	0.720361	CBLN4, CHRNB2, GABBR2, PPP1CC, APBA1	1	0.996266	100									SMART	SM00184:RING	3	0.973947	SH3RF2, RNF149, RNF111	1	1	100
GOTERM_BP_FAT	GO:0007268~synaptic transmission	4	0.849242	CHRNB2, GABBR2, CLN8, APBA1	1	0.999775	100
GOTERM_CC_FAT	GO:0044456~synapse part	3	0.850551	CHRNB2, GABBR2, APBA1	1	0.998173	100									Annotation Cluster 116	Enrichment Score: 0.08021526881307792
GOTERM_BP_FAT	GO:0019226~transmission of nerve impulse	4	0.916565	CHRNB2, GABBR2, CLN8, APBA1	1	0.999977	100									Category	Term	Count	PValue	Genes	Bonferroni	Benjamini	FDR
																INTERPRO	IPR011333:BTB/POZ fold	3	0.80593	KCND2, KCNA2, ZNF295	1	0.999999	100
Annotation Cluster 105	Enrichment Score: 0.07610812250327241															INTERPRO	IPR000210:BTB/POZ-like	3	0.80593	KCND2, KCNA2, ZNF295	1	0.999999	100
Category	Term	Count	PValue	Genes	Bonferroni	Benjamini	FDR									SMART	SM00225:BTB	3	0.884626	KCND2, KCNA2, ZNF295	1	0.999994	100
INTERPRO	IPR011333:BTB/POZ fold	3	0.813583	BCL6B, KCNF1, KCTD15	1	1	100
INTERPRO	IPR000210:BTB/POZ-like	3	0.813583	BCL6B, KCNF1, KCTD15	1	1	100									Annotation Cluster 117	Enrichment Score: 0.07402805710405293
SMART	SM00225:BTB	3	0.893041	BCL6B, KCNF1, KCTD15	1	0.999993	100									Category	Term	Count	PValue	Genes	Bonferroni	Benjamini	FDR
																INTERPRO	IPR001611:Leucine-rich repeat	3	0.745431	ANP32E, LRFN5, SLITRK5	1	0.999996	100
Annotation Cluster 106	Enrichment Score: 0.07230194430488351															UP_SEQ_FEATURE	repeat:LRR 4	3	0.812184	ANP32E, LRFN5, SLITRK5	1	1	100
Category	Term	Count	PValue	Genes	Bonferroni	Benjamini	FDR									UP_SEQ_FEATURE	repeat:LRR 3	3	0.856421	ANP32E, LRFN5, SLITRK5	1	1	100
UP_SEQ_FEATURE	repeat:WD 3	4	0.803806	RBBP4, WDR73, WDR5B, BCAS3	1	1	100									UP_SEQ_FEATURE	repeat:LRR 1	3	0.884745	ANP32E, LRFN5, SLITRK5	1	1	100
UP_SEQ_FEATURE	repeat:WD 1	4	0.820732	RBBP4, WDR73, WDR5B, BCAS3	1	1	100									UP_SEQ_FEATURE	repeat:LRR 2	3	0.884745	ANP32E, LRFN5, SLITRK5	1	1	100
UP_SEQ_FEATURE	repeat:WD 2	4	0.820732	RBBP4, WDR73, WDR5B, BCAS3	1	1	100									SP_PIR_KEYWORDS	leucine-rich repeat	3	0.886025	ANP32E, LRFN5, SLITRK5	1	0.999675	100
SP_PIR_KEYWORDS	wd repeat	4	0.824298	RBBP4, WDR73, WDR5B, BCAS3	1	0.994881	100
INTERPRO	IPR001680:WD40 repeat	4	0.839795	RBBP4, WDR73, WDR5B, BCAS3	1	1	100									Annotation Cluster 118	Enrichment Score: 0.051705801361215144
INTERPRO	IPR019775:WD40 repeat, conserved site	4	0.856688	RBBP4, WDR73, WDR5B, BCAS3	1	1	100									Category	Term	Count	PValue	Genes	Bonferroni	Benjamini	FDR
INTERPRO	IPR015943:WD40/YVTN repeat-like	4	0.890186	RBBP4, SEMA6C, WDR73, WDR5B	1	1	100									SP_PIR_KEYWORDS	signal	34	0.70873	WNT5A, TF, FGF8, C21ORF29, MMP9, CD247, PCDHGA8, ITGB5, PCDHGA2, SEMA5A, IGSF11, LMTK2, RNF149, LRFN5, PCSK5, INSR, VWA2, PTPRK, ATRNL1, PTPRG, GRIN1, CRTAP, F7, NPR3, LAMA2, TSLP, CDH13, SEMA6B, CRH, POFUT2, CTSC, WNT11, SLITRK5, LHB	1	0.996316	100
SMART	SM00320:WD40	4	0.923568	RBBP4, WDR73, WDR5B, BCAS3	1	0.999997	100									UP_SEQ_FEATURE	signal peptide	34	0.710719	WNT5A, TF, FGF8, C21ORF29, MMP9, CD247, PCDHGA8, ITGB5, PCDHGA2, SEMA5A, IGSF11, LMTK2, RNF149, LRFN5, PCSK5, INSR, VWA2, PTPRK, ATRNL1, PTPRG, GRIN1, CRTAP, F7, NPR3, LAMA2, TSLP, CDH13, SEMA6B, CRH, POFUT2, CTSC, WNT11, SLITRK5, LHB	1	1	100
																UP_SEQ_FEATURE	topological domain:Extracellular	25	0.798812	SLC16A14, IER3, CD247, PCDHGA8, ITGB5, GPRC5A, PCDHGA2, GJA3, SEMA5A, AGTR1, IGSF11, LRFN5, INSR, PTPRK, ATRNL1, TRPM8, PTPRG, GRIN1, NIPA1, NPR3, LIM2, SEMA6B, GHSR, SLITRK5, SERP1	1	1	100
Annotation Cluster 107	Enrichment Score: 0.06778638164622822															UP_SEQ_FEATURE	glycosylation site:N-linked (GlcNAc...)	40	0.842003	WNT5A, TF, IER3, FGF8, C21ORF29, MMP9, KCNA2, PCDHGA8, ITGB5, GPRC5A, PCDHGA2, SEMA5A, IGSF11, AGTR1, TMEM145, LMTK2, RNF149, LRFN5, PCSK5, INSR, VWA2, PTPRK, ATRNL1, PTPRG, GRIN1, CRTAP, F7, LIM2, LAMA2, TSLP, CDH13, SEMA6B, BVES, POFUT2, CTSC, WNT11, GHSR, SLITRK5, LHB, HS3ST3B1	1	1	100
Category	Term	Count	PValue	Genes	Bonferroni	Benjamini	FDR									SP_PIR_KEYWORDS	glycoprotein	42	0.851215	WNT5A, TF, IER3, FGF8, C21ORF29, MMP9, KCNA2, PCDHGA8, ITGB5, GPRC5A, PCDHGA2, SEMA5A, IGSF11, AGTR1, TMEM145, LMTK2, RNF149, LRFN5, PCSK5, INSR, VWA2, PTPRK, ATRNL1, PTPRG, CRTAP, GRIN1, F7, NPR3, LIM2, LAMA2, TSLP, CDH13, SEMA6B, BVES, POFUT2, CTSC, WNT11, GNAS, GHSR, SLITRK5, LHB, HS3ST3B1	1	0.999382	100
GOTERM_CC_FAT	GO:0005789~endoplasmic reticulum membrane	4	0.686511	STT3B, VAPA, BCL2, HSPA5	1	0.99566	100									UP_SEQ_FEATURE	disulfide bond	22	0.874835	PTPRK, TF, CLTB, ATRNL1, MMP9, GRIN1, CD247, ITGB5, MALT1, NPR3, F7, SEMA5A, LAMA2, AGTR1, IGSF11, SEMA6B, CTSC, GHSR, INSR, LHB, HS3ST3B1, VWA2	1	1	100
GOTERM_CC_FAT	GO:0042175~nuclear envelope-endoplasmic reticulum network	4	0.721146	STT3B, VAPA, BCL2, HSPA5	1	0.995969	100									SP_PIR_KEYWORDS	disulfide bond	23	0.878712	PTPRK, TF, CLTB, ATRNL1, MMP9, GRIN1, CD247, ITGB5, MALT1, NPR3, F7, LIM2, SEMA5A, LAMA2, AGTR1, IGSF11, SEMA6B, CTSC, GHSR, INSR, LHB, HS3ST3B1, VWA2	1	0.99966	100
GOTERM_CC_FAT	GO:0044432~endoplasmic reticulum part	4	0.839653	STT3B, VAPA, BCL2, HSPA5	1	0.998018	100									UP_SEQ_FEATURE	topological domain:Cytoplasmic	28	0.978893	SLC16A14, IER3, CD247, PCDHGA8, ITGB5, GPRC5A, PCDHGA2, GJA3, SEMA5A, AGTR1, IGSF11, LRFN5, INSR, PTPRK, KCND2, TRPM8, SEC11C, ATRNL1, PTPRG, GRIN1, NIPA1, NPR3, LIM2, SEMA6B, GHSR, SLITRK5, HS3ST3B1, SERP1	1	1	100
GOTERM_CC_FAT	GO:0012505~endomembrane system	9	0.86727	STT3B, VAPA, BCL2, DOCK9, NUP107, HSPA5, TNPO1, ITGA2B, GJB2	1	0.998554	100									SP_PIR_KEYWORDS	membrane	62	0.991292	IER3, SLC16A14, CLTB, PCDHGA8, LEMD2, MCF2L, PCDHGA2, GJA3, KCNIP3, ARHGAP21, AGTR1, TMEM145, ANK1, SLC25A24, PIGC, ELOVL6, RNF149, ATP5H, AGPAT3, INSR, PTPRK, OSBP2, KCND2, TRPM8, ATRNL1, PTPRG, CYP2E1, BVES, LRAT, TMEM69, RAB14, RAB12, GNAS, SLITRK5, HS3ST3B1, COPE, SERP1, ARFGAP3, KCNA2, CD247, ITGB5, GPRC5A, FAM19A5, SEMA5A, IGSF11, SLC35B4, LMTK2, LRFN5, INPP5A, PHLDA2, SEC11C, GRIN1, NIPA1,…	1	1	100
GOTERM_CC_FAT	GO:0031090~organelle membrane	11	0.942963	STT3B, TSPO, UQCRC1, VAPA, BCL2, FAAH, HSPA5, PPP1CC, ACAT1, ITGA2B, GJB2	1	0.999826	100									GOTERM_CC_FAT	GO:0031224~intrinsic to membrane	48	0.995466	IER3, SLC16A14, KCNA2, CD247, LEMD2, PCDHGA8, ITGB5, GPRC5A, PCDHGA2, GJA3, FAM19A5, KCNIP3, SEMA5A, IGSF11, AGTR1, TMEM145, SLC25A24, SLC35B4, LMTK2, PIGC, ELOVL6, RNF149, LRFN5, AGPAT3, INSR, INPP5A, PTPRK, KCND2, TRPM8, ATRNL1, SEC11C, PTPRG, GRIN1, NIPA1, CYP2E1, NPR3, LIM2, CDH13, SEMA6B, BVES, LRAT, TMEM69, RAB12, GNAS, GHSR, SLITRK5, HS3ST3B1, SERP1	1	1	100
GOTERM_CC_FAT	GO:0005783~endoplasmic reticulum	7	0.992297	STT3B, VAPA, BCL2, PCSK9, HSPA5, CLN8, APEX1	1	0.999999	100									UP_SEQ_FEATURE	transmembrane region	42	0.996824	IER3, SLC16A14, KCNA2, CD247, LEMD2, PCDHGA8, ITGB5, GPRC5A, PCDHGA2, GJA3, FAM19A5, SEMA5A, IGSF11, AGTR1, TMEM145, SLC25A24, SLC35B4, LMTK2, PIGC, ELOVL6, RNF149, LRFN5, AGPAT3, INSR, PTPRK, KCND2, TRPM8, ATRNL1, SEC11C, PTPRG, GRIN1, NIPA1, NPR3, LIM2, SEMA6B, BVES, LRAT, TMEM69, GHSR, SLITRK5, HS3ST3B1, SERP1	1	1	100
SP_PIR_KEYWORDS	endoplasmic reticulum	5	0.994108	STT3B, BCL2, HSPA5, CLN8, LPIN1	1	0.999998	100									SP_PIR_KEYWORDS	transmembrane	42	0.9971	IER3, SLC16A14, KCNA2, CD247, LEMD2, PCDHGA8, ITGB5, GPRC5A, PCDHGA2, GJA3, FAM19A5, SEMA5A, IGSF11, AGTR1, TMEM145, SLC25A24, SLC35B4, LMTK2, PIGC, ELOVL6, RNF149, LRFN5, AGPAT3, INSR, PTPRK, KCND2, TRPM8, ATRNL1, SEC11C, PTPRG, GRIN1, NIPA1, NPR3, LIM2, SEMA6B, BVES, LRAT, TMEM69, GHSR, SLITRK5, HS3ST3B1, SERP1	1	1	100
																GOTERM_CC_FAT	GO:0016021~integral to membrane	42	0.999437	IER3, SLC16A14, KCNA2, CD247, LEMD2, PCDHGA8, ITGB5, GPRC5A, PCDHGA2, GJA3, FAM19A5, SEMA5A, IGSF11, AGTR1, TMEM145, SLC25A24, SLC35B4, LMTK2, PIGC, ELOVL6, RNF149, LRFN5, AGPAT3, INSR, PTPRK, KCND2, TRPM8, ATRNL1, SEC11C, PTPRG, GRIN1, NIPA1, NPR3, LIM2, SEMA6B, BVES, LRAT, TMEM69, GHSR, SLITRK5, HS3ST3B1, SERP1	1	1	100
Annotation Cluster 108	Enrichment Score: 0.046781903830713706
Category	Term	Count	PValue	Genes	Bonferroni	Benjamini	FDR									Annotation Cluster 119	Enrichment Score: 0.04628853114666028
GOTERM_MF_FAT	GO:0004175~endopeptidase activity	5	0.687222	CFLAR, UQCRC1, PCSK9, HTRA4, ADAM12	1	0.998185	100									Category	Term	Count	PValue	Genes	Bonferroni	Benjamini	FDR
GOTERM_MF_FAT	GO:0070011~peptidase activity, acting on L-amino acid peptides	5	0.940728	CFLAR, UQCRC1, PCSK9, HTRA4, ADAM12	1	0.999986	100									GOTERM_BP_FAT	GO:0032504~multicellular organism reproduction	7	0.790151	CTTNBP2, CDYL, BCAT2, LIMK2, CRTAP, GRIN1, DND1	1	0.999515	100
GOTERM_MF_FAT	GO:0008233~peptidase activity	5	0.954829	CFLAR, UQCRC1, PCSK9, HTRA4, ADAM12	1	0.999994	100									GOTERM_BP_FAT	GO:0048609~reproductive process in a multicellular organism	7	0.790151	CTTNBP2, CDYL, BCAT2, LIMK2, CRTAP, GRIN1, DND1	1	0.999515	100
GOTERM_BP_FAT	GO:0006508~proteolysis	10	0.964815	ARIH1, CFLAR, SHPRH, UQCRC1, ZC3HC1, WDR5B, PCSK9, HTRA4, ADAM12, CD2AP	1	0.999999	100									GOTERM_BP_FAT	GO:0007276~gamete generation	4	0.953106	CDYL, LIMK2, CRTAP, DND1	1	0.999999	100
SP_PIR_KEYWORDS	Protease	3	0.979849	PCSK9, HTRA4, ADAM12	1	0.999971	100									GOTERM_BP_FAT	GO:0048232~male gamete generation	3	0.954823	CDYL, LIMK2, CRTAP	1	0.999999	100
																GOTERM_BP_FAT	GO:0007283~spermatogenesis	3	0.954823	CDYL, LIMK2, CRTAP	1	0.999999	100
Annotation Cluster 109	Enrichment Score: 0.03070911898899548															GOTERM_BP_FAT	GO:0019953~sexual reproduction	4	0.972438	CDYL, LIMK2, CRTAP, DND1	1	1	100
Category	Term	Count	PValue	Genes	Bonferroni	Benjamini	FDR
GOTERM_CC_FAT	GO:0005615~extracellular space	5	0.883943	ICAM1, PCSK9, NENF, MMRN2, FN1	1	0.998809	100									Annotation Cluster 120	Enrichment Score: 0.012980545767958927
GOTERM_CC_FAT	GO:0044421~extracellular region part	7	0.929746	ICAM1, PTPRZ1, PCSK9, COL6A1, NENF, MMRN2, FN1	1	0.999728	100									Category	Term	Count	PValue	Genes	Bonferroni	Benjamini	FDR
GOTERM_CC_FAT	GO:0005576~extracellular region	14	0.944528	ICAM1, NXPH2, PNLIPRP2, PTPRZ1, GDNF, MMRN2, CBLN4, COL6A1, PCSK9, HTRA4, FAS, NENF, ADAM12, FN1	1	0.999824	100									SP_PIR_KEYWORDS	transit peptide	5	0.944952	GFM2, BCAT2, DGUOK, LIPT1, ACAA1	1	0.999918	100
SP_PIR_KEYWORDS	Secreted	11	0.970868	NXPH2, CBLN4, PNLIPRP2, PCSK9, COL6A1, FAS, ADAM12, NENF, GDNF, MMRN2, FN1	1	0.999929	100									UP_SEQ_FEATURE	transit peptide:Mitochondrion	4	0.979428	GFM2, BCAT2, DGUOK, LIPT1	1	1	100
																SP_PIR_KEYWORDS	mitochondrion	7	0.987816	GFM2, BCAT2, SLC25A24, ELOVL6, DGUOK, LIPT1, ATP5H	1	0.999999	100
Annotation Cluster 110	Enrichment Score: 0.030406327321845915
Category	Term	Count	PValue	Genes	Bonferroni	Benjamini	FDR									Annotation Cluster 121	Enrichment Score: 0.009963391960909796
GOTERM_BP_FAT	GO:0044265~cellular macromolecule catabolic process	10	0.834394	ZFP36L1, ARIH1, SHPRH, ZC3HC1, WDR5B, GTF2H4, PCSK9, CD2AP, CLN8, MYC	1	0.999672	100									Category	Term	Count	PValue	Genes	Bonferroni	Benjamini	FDR
GOTERM_BP_FAT	GO:0009057~macromolecule catabolic process	10	0.880168	ZFP36L1, ARIH1, SHPRH, ZC3HC1, WDR5B, GTF2H4, PCSK9, CD2AP, CLN8, MYC	1	0.9999	100									GOTERM_CC_FAT	GO:0019866~organelle inner membrane	3	0.945074	SLC25A24, LEMD2, ATP5H	1	0.999946	100
SP_PIR_KEYWORDS	ubl conjugation pathway	6	0.892591	ARIH1, SHPRH, ZC3HC1, WDR5B, TRIM41, MKRN2	1	0.998244	100									GOTERM_CC_FAT	GO:0031967~organelle envelope	4	0.993766	SLC25A24, LEMD2, CENPF, ATP5H	1	1	100
GOTERM_BP_FAT	GO:0044257~cellular protein catabolic process	7	0.930012	ARIH1, SHPRH, ZC3HC1, WDR5B, PCSK9, CD2AP, CLN8	1	0.999989	100									GOTERM_CC_FAT	GO:0031975~envelope	4	0.993939	SLC25A24, LEMD2, CENPF, ATP5H	1	1	100
GOTERM_BP_FAT	GO:0030163~protein catabolic process	7	0.941832	ARIH1, SHPRH, ZC3HC1, WDR5B, PCSK9, CD2AP, CLN8	1	0.999995	100
GOTERM_BP_FAT	GO:0006508~proteolysis	10	0.964815	ARIH1, CFLAR, SHPRH, UQCRC1, ZC3HC1, WDR5B, PCSK9, HTRA4, ADAM12, CD2AP	1	0.999999	100
GOTERM_BP_FAT	GO:0019941~modification-dependent protein catabolic process	5	0.985711	ARIH1, SHPRH, ZC3HC1, WDR5B, CD2AP	1	1	100
GOTERM_BP_FAT	GO:0043632~modification-dependent macromolecule catabolic process	5	0.985711	ARIH1, SHPRH, ZC3HC1, WDR5B, CD2AP	1	1	100
GOTERM_BP_FAT	GO:0051603~proteolysis involved in cellular protein catabolic process	5	0.989346	ARIH1, SHPRH, ZC3HC1, WDR5B, CD2AP	1	1	100
Annotation Cluster 111	Enrichment Score: 0.029287300313867386
Category	Term	Count	PValue	Genes	Bonferroni	Benjamini	FDR
GOTERM_CC_FAT	GO:0000267~cell fraction	12	0.842739	IARS, RECK, NARS, ANKRA2, VAPA, RASGRF1, BCL2, FAS, GCLM, ATP7B, MAP3K11, DUSP6	1	0.997994	100
GOTERM_CC_FAT	GO:0005624~membrane fraction	6	0.982366	RECK, ANKRA2, VAPA, RASGRF1, BCL2, ATP7B	1	0.999992	100
GOTERM_CC_FAT	GO:0005626~insoluble fraction	6	0.98667	RECK, ANKRA2, VAPA, RASGRF1, BCL2, ATP7B	1	0.999996	100
Annotation Cluster 112	Enrichment Score: 0.003047631311215961
Category	Term	Count	PValue	Genes	Bonferroni	Benjamini	FDR
SP_PIR_KEYWORDS	mitochondrion	7	0.987816	TSPO, UQCRC1, CCDC90B, BCL2, BZRAP1, ACAT1, ATP7B	1	0.999989	100
UP_SEQ_FEATURE	transit peptide:Mitochondrion	3	0.995315	UQCRC1, CCDC90B, ACAT1	1	1	100
SP_PIR_KEYWORDS	transit peptide	3	0.99591	UQCRC1, CCDC90B, ACAT1	1	0.999999	100
